# Supplementary material for: The transcriptional landscape underlying larval development and metamorphosis in the Malabar grouper (Epinephelus malabaricus)
Source: eLife. 2024 Aug 9;13:RP94573. doi: 10.7554/eLife.94573 (PMC11315451; doi:10.7554/eLife.94573)
Supplement: Figure 3—source data 1. [file elife-94573-fig3-data1.xlsx]

## Sheet: Hormone_measurements
Name	T4		T3		Cortisol
	ng/g		ng/g		ng/g
D1-A	0.1	*	0.04		0.28	*
D1-B	0.1	*	0.06		0.27	*
D1-C	0.14	*	0.09		0.27	*
D3-A	1.2		0.04		8.03
D3-B	1.01		0.13		7.09
D3-C	1.49		0.06		3.14
D6-A	0.9		0.06		6.61
D6-B	0.86		0.02	*	11.19
D6-C	1.1		0	*	11.56
D10-A	0.36		0.01	*	33.2
D10-B	0.36		0	*	40.19
D10-C	0.49		0	*	36.37
* Reference value as it is below the lower limit of quantification
Lower Limit of Determination：T4 ； 4, T3 ； 0.5 (pg/assay)
Lower Limit of Determination： Cortisol 10 (pg/assay)
