# Supplementary material for: The transcriptional landscape underlying larval development and metamorphosis in the Malabar grouper (Epinephelus malabaricus)
Source: eLife. 2024 Aug 9;13:RP94573. doi: 10.7554/eLife.94573 (PMC11315451; doi:10.7554/eLife.94573)
Supplement: Source data 1. [file elife-94573-data1.xlsx]

## Sheet: Gene_count_data
Sample	REMD01_1_S1	REMD01_2_S2	REMD01_3_S3	REMD03_1_S4	REMD03_2_S5	REMD03_3_S6	REMD06_1_S301	REMD06_2_S302	REMD06_3_S303	REMD10_1_S7	REMD10_2_S8	REMD10_3_S9	REMD13_1_S10	REMD13_2_S11	REMD13_3_S12	REMD18_1_S13	REMD18_2_S14	REMD18_3_S15	REMD32_1_S16	REMD32_2_S17	REMD32_3_S18	REMD60_1_S19	REMD60_2_S20	REMD60_3_S21	REMD60J_1_S22	REMD60J_2_S23	REMD60J_3_S24
jg3138	567	568	606	722	669	606	282	393	377	515	975	851	710	584	611	621	582	559	782	641	700	486	558	797	455	679	496
jg3139	1352	1587	1531	1785	1900	1497	441	581	509	1090	1473	1025	956	1013	997	725	1001	938	2579	933	2275	866	1352	1066	818	746	820
jg3140	272	326	299	2267	1905	2096	459	617	652	758	1118	1194	1165	1236	1375	837	1232	1161	1805	1201	1473	633	943	1127	421	499	485
jg3141	0	3	4	6	2	3	1	3	7	1	5	7	2	2	3	6	13	1	10	2	5	5	2	4	11	4	8
jg3142	83	92	114	69	52	75	43	59	46	46	82	97	74	65	79	56	73	54	67	79	101	77	51	44	59	53	84
jg3143	298	310	323	626	576	546	308	283	426	496	625	484	498	517	454	469	592	368	494	482	684	368	443	404	397	300	347
jg3144	203	154	133	125	110	66	13	11	20	46	37	51	72	55	52	46	41	48	101	59	104	55	57	45	30	46	53
jg3145	133	202	117	53	52	40	15	18	10	28	50	31	34	49	50	35	43	38	919	157	1151	88	440	287	53	51	70
jg3146	2347	2088	1866	1602	1519	1500	396	458	541	857	1341	1906	824	1216	881	1019	1202	996	61058	4539	31517	5866	10122	12750	1826	1614	2544
jg3147	32	57	42	277	282	220	85	105	81	248	253	347	200	234	283	117	152	140	479	124	305	69	103	179	83	49	76
jg3148	728	629	601	540	645	483	183	196	251	343	466	328	227	168	208	67	108	81	53	10	47	39	35	33	20	12	22
jg3149	32	23	25	459	421	338	115	179	127	196	166	235	175	196	180	181	267	194	250	250	251	73	148	260	119	101	78
jg3150	249	264	259	162	172	143	90	106	121	122	210	197	202	223	174	220	198	214	105	155	141	242	262	119	230	298	158
jg3151	40	36	31	53	81	64	28	37	14	28	60	42	43	35	38	32	17	37	28	12	19	52	28	22	30	47	46
jg3152	2734	3150	2921	931	1033	901	1013	984	1201	2332	2642	2124	1790	1913	1515	1783	2216	1435	878	879	869	748	831	1045	961	993	738
jg3153	7206	8768	9879	3904	4186	3890	2534	3275	3117	7439	6565	5584	4655	5478	6703	5391	6034	4504	2837	3344	3905	7543	6297	2522	10978	9218	7798
jg3154	642	1054	844	424	487	442	348	443	479	948	895	1063	924	974	990	1236	1007	620	183	527	426	1077	687	332	1112	1006	986
jg3155	32	53	57	147	147	106	73	83	78	294	276	264	343	384	390	538	541	443	500	422	694	911	784	441	1188	1097	771
jg3157	3098	3856	3760	2397	2658	2215	1861	2095	2137	5531	4896	5014	7445	7555	9885	9449	8341	7832	1658	4095	2190	13324	7296	2522	23841	17410	15659
jg3158	1129	1367	1707	2717	2642	2125	821	1047	940	1738	1895	1862	1212	1701	1614	1537	1424	1340	3446	1485	1752	2765	3820	1203	2368	1700	1352
jg3159	365	435	467	898	806	627	173	227	211	435	409	383	376	334	317	402	436	370	746	441	832	425	531	892	1003	948	830
jg3160	1	2	0	1	7	1	0	2	1	5	1	13	4	1	1	5	2	1	3	5	0	0	1	3	2	1	1
jg3161	2	4	5	2	3	1	0	5	0	0	5	3	3	3	3	1	0	2	2	1	2	1	2	2	0	3	2
jg3162	232	268	256	297	263	248	132	138	156	439	365	359	428	599	738	531	759	741	1443	935	1183	1161	1741	1165	1618	1110	1176
jg3163	104	145	122	183	221	174	77	56	68	272	194	221	218	415	412	321	464	462	949	617	531	795	1151	747	960	576	695
jg3164	8	11	10	37	45	32	6	6	1	17	12	7	8	7	9	7	13	14	0	4	27	10	8	3	13	0	10
jg3165	70	41	64	255	233	188	39	58	52	62	170	93	46	53	74	33	45	32	14	24	26	28	13	33	3	8	7
jg3166	198	175	189	1463	1420	1117	273	341	339	335	515	382	233	226	227	119	191	167	449	352	473	131	152	297	29	29	33
jg3167	1012	1201	1196	752	848	752	454	556	571	1030	1312	869	858	817	789	714	780	598	541	522	590	373	414	457	382	897	650
jg3168	1533	1655	1741	3924	3691	3394	1839	2168	2373	2493	3264	3612	2084	2276	2684	2069	2252	1815	2394	2195	2102	1552	2144	2061	934	1073	824
jg3169	261	324	263	3446	3613	3106	678	831	903	1420	1631	1431	845	871	1156	669	454	815	1126	514	268	785	1399	287	263	370	335
jg3170	8506	11493	10182	5319	5456	4937	5977	5284	6973	11141	10513	13244	9331	9214	10141	12803	10787	7089	11772	11037	13396	7128	11118	12702	5961	5919	5464
jg3171	973	1223	1033	1086	1334	1106	613	645	845	1691	1553	1366	905	884	872	979	1090	700	1070	1122	1287	555	673	963	645	551	401
jg3172	993	1053	1286	1220	1392	1137	184	296	270	529	789	489	766	721	842	737	790	753	689	617	606	1122	1228	635	1154	1181	1151
jg3173	156	134	175	537	590	454	30	52	51	96	92	92	92	178	210	109	121	110	1051	175	1079	294	592	294	275	247	388
jg3174	518	561	479	390	434	393	230	253	368	566	788	609	496	448	632	632	566	589	758	692	780	692	779	1089	818	955	892
jg3175	8	3	13	13	23	10	11	7	6	31	28	31	41	31	56	28	27	34	44	34	43	65	63	73	50	88	90
jg3176	96	85	122	959	928	725	267	332	380	399	474	536	451	505	580	610	552	620	2141	1269	1454	740	1038	1233	1092	977	879
jg3177	1269	1653	1353	1111	1181	1006	524	638	632	1269	1298	1198	1184	1132	1279	996	1076	928	529	537	564	427	457	502	364	344	339
jg3178	931	1017	933	1087	1143	887	264	314	265	663	878	589	697	712	635	588	631	618	1361	484	1501	439	774	482	521	569	550
jg3179	6	10	8	9	6	1	8	10	5	19	34	6	8	45	37	70	114	44	11	57	75	86	219	105	127	0	96
jg3180	4	9	10	7	4	4	10	6	4	8	16	10	8	25	10	30	54	7	10	38	38	39	104	55	78	0	14
jg3181	0	0	0	0	0	0	0	0	0	0	0	1	2	2	0	1	4	0	0	2	0	3	3	0	1	0	0
jg3182	10	15	11	20	36	21	7	13	16	10	12	12	12	14	13	10	1	13	32	3	8	3	2	8	11	21	3
jg3183	17	7	9	14	11	17	12	15	19	15	28	34	47	27	78	38	14	79	46	46	61	49	17	55	77	165	94
jg3184	15	12	5	12	6	14	1	1	12	8	10	25	30	35	50	18	4	34	31	24	36	38	9	30	25	103	92
jg3185	7	7	6	9	8	4	11	3	1	2	7	16	7	3	14	13	7	8	7	6	13	10	3	5	12	8	23
jg3186	78	85	104	118	98	92	62	48	77	248	176	163	157	252	291	289	368	390	860	516	754	824	1113	546	856	492	693
jg3187	3	0	3	6	10	6	2	0	1	5	5	16	10	11	9	3	19	18	9	33	13	4	21	17	18	19	20
jg3188	1125	1142	1150	2723	5778	2554	3255	2637	1718	32143	56855	38381	155525	232284	189017	108561	170884	166574	92536	63649	77076	81605	64341	50957	50	23	71
jg3190	19	34	48	333	314	252	145	186	207	196	253	251	194	182	221	196	155	166	125	221	161	147	150	196	85	105	77
jg3191	937	1077	1125	3435	3309	2696	1339	1618	1735	2114	2479	2385	1867	2368	2555	1982	2440	1724	2164	1950	1956	1117	1471	1547	507	486	392
jg3192	90	102	130	421	431	358	232	276	249	692	687	610	567	560	468	763	713	432	75	148	64	543	508	142	777	901	480
jg3193	3067	3514	3204	3566	3719	3016	1008	1255	1327	2531	3179	2445	2375	2355	2521	2275	2524	2360	8195	3340	8602	2596	3626	4371	2710	2501	2522
jg3194	2808	2991	2699	3775	4012	3081	1016	1248	937	3224	4994	3299	4588	4237	4105	4224	4877	3799	1535	1926	1492	3509	2866	1596	3981	3136	3406
jg3195	72	49	46	78	105	89	145	111	150	528	700	463	387	953	281	814	1104	610	58	328	93	574	560	37	397	1563	684
jg3196	64	76	62	94	98	95	79	92	110	200	196	172	128	213	111	156	209	106	77	207	121	168	236	199	227	466	300
jg3197	28772	31637	29930	63685	73435	62494	21147	27489	25732	69976	63354	47925	36318	43998	47198	28045	42720	39420	55069	39760	48136	38766	42465	39410	40231	37914	40036
jg3198	1016	1048	1156	705	770	702	436	504	472	956	1172	1718	909	872	974	768	964	784	1200	646	1349	525	754	790	632	699	607
jg3199	12	26	39	33	12	25	7	11	8	17	19	80	13	25	21	18	35	9	19	8	20	15	17	19	10	16	27
jg3200	36	34	20	146	185	123	80	92	110	306	261	204	154	197	238	207	195	249	1487	1484	1165	2197	2922	4206	3975	4484	4702
jg3201	1300	1388	1490	1769	2038	1646	334	415	417	1044	1369	963	945	883	851	839	1029	771	1231	984	1151	752	858	917	961	721	772
jg3203	163	200	192	212	232	162	70	88	85	174	189	133	178	139	144	166	190	146	149	143	131	126	131	143	130	88	121
jg3204	2535	3145	2902	5647	5381	4400	1400	2147	1873	4535	3155	2999	1588	1953	2683	1719	1636	1337	1000	1923	1118	4093	3782	939	2397	1654	1641
jg3205	5	3	3	99	104	101	25	31	23	58	102	44	35	44	22	59	29	40	1412	214	195	820	1082	215	410	541	625
jg3208	667	758	697	2438	2641	2032	841	806	865	1907	2413	2372	2686	2813	2293	2317	3045	2562	2521	1272	2066	1684	1611	907	1426	873	1695
jg3209	2	1	0	8	1	1	0	0	4	1	2	2	1	0	0	5	3	0	2	3	2	0	0	0	0	0	0
jg3212	70	73	80	1348	1242	1084	368	510	473	460	565	539	429	521	514	448	458	510	1814	623	1144	944	1650	802	717	920	688
jg3213	1246	1187	1255	980	924	956	386	446	449	1028	1480	1183	859	892	886	701	1009	760	757	606	898	508	597	523	629	702	637
jg3214	73	107	92	157	142	168	51	70	81	170	205	273	166	292	332	247	407	368	928	526	691	729	1038	693	810	570	607
jg3215	29	26	31	175	164	164	37	44	63	192	274	199	279	305	227	254	358	280	142	173	116	168	172	144	235	211	188
jg3216	39	51	45	173	185	148	24	45	40	80	91	135	61	77	68	45	69	54	289	88	188	47	64	117	55	35	33
jg3217	238	305	276	162	156	135	98	150	177	321	281	177	214	200	200	209	212	160	173	188	272	132	212	208	134	172	218
jg3219	27	33	20	42	39	47	7	14	17	40	72	24	44	45	45	38	43	41	39	40	36	63	44	33	94	70	101
jg3221	91	145	166	214	236	165	84	100	108	377	261	269	258	533	540	551	694	647	1592	978	925	1723	2244	1118	1897	1515	1482
jg3222	59	49	61	63	75	49	28	22	34	68	75	65	53	57	98	80	106	130	420	190	188	251	380	198	390	250	349
jg3223	12	10	31	37	35	32	14	27	16	23	22	31	30	21	15	21	11	23	15	27	25	7	23	11	31	38	9
jg3225	467	489	502	656	684	530	126	184	140	267	298	243	274	265	289	173	275	206	141	117	146	62	68	116	34	32	50
jg3226	645	753	813	916	911	806	448	469	488	726	941	1246	909	1016	954	930	1117	930	1040	954	931	639	817	800	504	476	503
jg3230	70	96	146	243	235	156	94	78	78	162	150	201	195	191	206	178	185	146	196	179	184	121	145	151	119	50	97
jg3234	29	60	61	36	44	33	17	41	23	50	31	51	40	67	58	27	61	48	75	64	47	26	43	58	39	30	27
jg3235	2	9	5	77	66	56	18	14	42	122	65	133	37	52	53	70	130	52	151	302	158	38	83	286	120	79	87
jg3236	5	5	5	6	16	1	0	2	10	5	5	6	3	7	8	11	9	4	8	10	5	7	4	12	2	4	4
jg3237	970	1118	1151	1066	1177	938	388	447	512	1035	1371	1009	1046	997	1012	1045	1250	921	727	760	793	777	885	651	1055	908	959
jg3238	47	76	109	150	167	101	28	70	51	123	154	153	155	161	108	99	151	111	110	66	112	105	75	86	129	73	80
jg3239	63	100	108	302	349	251	99	113	137	274	396	268	354	349	229	209	271	216	240	123	216	198	178	143	169	129	145
jg3248	935	1042	1079	398	373	365	131	134	184	409	578	605	396	432	374	286	378	400	94	166	116	103	85	100	106	78	132
jg3250	810	1005	935	1134	1133	939	571	583	655	990	1295	1568	1249	1319	1153	1116	1409	975	1405	1307	1273	986	1214	1167	1014	915	887
jg3251	368	417	335	1392	1510	1421	622	737	751	1723	1390	1237	697	977	965	722	687	634	509	468	429	912	933	261	623	643	431
jg3252	2026	2631	2010	1884	2202	1686	766	824	880	1324	1849	1644	1123	988	1069	560	782	819	220	251	207	274	314	252	567	486	573
jg3253	242	184	131	381	332	304	91	130	95	131	163	110	125	167	124	72	143	144	70	79	58	222	95	52	252	173	168
jg3254	9971	13725	11965	6613	7107	5442	2858	2726	3450	8375	9916	8326	7786	7348	7158	8815	9024	6725	12122	4839	9623	5669	7591	4872	6189	5174	5171
jg3255	323	417	339	1761	2221	1381	272	399	287	874	811	440	349	434	410	287	397	378	1299	1201	853	3509	3466	1070	6041	4722	4978
jg3256	6	14	12	3	25	8	1	6	5	55	282	114	6296	9584	4037	8285	13024	6287	25630	8694	16899	12372	8957	513	10	5	1
jg3257	3	6	4	50	44	37	38	38	33	50	42	52	97	65	54	43	40	40	66	48	58	32	60	59	24	42	42
jg3259	175	216	175	179	176	138	78	84	105	164	154	183	95	131	160	87	128	86	224	108	137	85	108	155	46	71	70
jg3260	58	50	46	56	52	35	35	49	41	18	42	39	33	22	22	41	29	25	63	33	40	23	34	38	30	30	16
jg3261	4	2	0	1	0	1	1	0	0	0	0	0	0	0	3	0	0	0	0	0	1	2	0	1	1	0	0
jg3262	3	4	8	12	13	10	11	13	11	54	91	61	68	64	56	144	121	101	72	180	58	412	318	345	713	662	708
jg3263	59	36	49	47	69	44	11	29	21	46	52	49	70	70	85	76	79	98	42	45	26	78	45	16	61	36	62
jg3265	200	173	298	585	569	465	305	312	334	406	817	825	1020	1068	737	1031	1325	1124	1190	769	783	804	806	644	831	711	675
jg3266	178	262	246	469	438	344	146	163	157	214	272	329	223	208	232	183	240	267	277	267	272	178	236	259	232	159	155
jg3267	34	54	59	109	135	103	29	21	26	48	44	62	42	31	41	33	46	49	43	45	56	28	42	43	22	37	33
jg3269	39	47	41	343	383	302	100	122	173	265	217	185	88	118	122	82	140	129	270	196	191	89	122	151	45	60	49
jg3270	2301	2670	3063	1466	1496	1274	686	703	749	1354	2192	1776	2032	2062	1873	2440	2414	2609	1390	1873	1935	3418	3135	1752	3036	3039	2400
jg3272	0	0	0	1	2	0	0	0	0	0	0	1	0	0	11	1	2	2	1	2	5	1	5	2	0	5	0
jg3274	125	181	192	171	207	149	62	92	102	142	237	233	272	378	386	299	425	294	275	394	345	463	497	576	371	301	340
jg3276	613	703	654	1332	1258	1122	445	508	485	692	1054	1167	875	916	1059	933	1058	907	908	879	817	690	900	944	610	595	627
jg3277	974	972	900	1239	1377	1233	601	629	660	1604	1642	1409	1942	12800	32663	3737	8579	3551	6036	7018	8173	5935	7944	5524	9098	5229	4967
jg3278	0	0	0	1	0	0	0	0	1	1	1	0	0	3	5	1	1	2	30	15	4	16	24	19	22	26	48
jg3279	0	0	1	3	4	3	2	0	3	14	7	1	1	5	3	38	27	15	82	158	222	541	850	947	5271	3807	4010
jg3280	0	0	0	4	7	2	3	1	0	32	9	2	9	6	12	29	34	12	12	17	18	28	39	24	69	78	74
jg3281	5	3	1	3	3	5	7	7	5	21	13	3	10	8	14	38	61	23	16	35	35	49	61	34	135	159	137
jg3282	1230	1717	1703	2302	2214	2206	2092	2343	2639	5032	5948	4936	2430	1934	2903	3968	3125	2196	939	2070	1585	2841	3122	1910	3349	3442	2322
jg3283	23	10	2	19	35	41	15	15	37	14	14	114	68	57	118	10	3	85	24	44	6	10	1	43	15	31	52
jg3284	9	10	23	24	9	9	4	8	2	6	8	29	6	10	15	11	14	15	58	74	47	31	42	21	104	114	180
jg3285	779	917	923	412	413	331	185	167	212	436	465	355	364	362	429	293	384	446	602	279	550	281	410	266	446	409	457
jg3286	75	89	87	46	46	48	24	19	17	48	41	34	46	38	50	41	30	62	81	33	75	44	57	39	38	49	31
jg3287	44	41	44	359	361	266	61	99	92	129	63	135	132	120	175	92	136	69	186	93	179	148	136	74	99	95	83
jg3288	1135	1137	1224	4038	3293	3559	754	886	1042	1467	1767	1781	1927	2099	1823	2089	2502	1853	43650	16788	44574	8121	24571	39983	2445	2152	3461
jg3289	30	60	37	228	244	190	107	107	148	191	216	277	191	212	196	152	192	174	218	109	151	92	143	124	111	94	110
jg3291	269	361	367	405	419	432	61	67	84	153	305	147	524	1408	697	854	1258	940	962	908	930	1604	953	445	1229	1256	1218
jg3292	0	0	0	2	5	1	0	0	0	3	3	2	0	1	2	3	4	3	7	10	6	5	6	9	6	11	17
jg3295	0	0	0	0	3	2	0	1	0	1	0	0	0	2	2	0	2	0	3	0	6	0	0	0	3	1	2
jg3296	0	0	0	0	1	0	0	0	0	0	1	0	3	0	0	0	0	1	2	3	1	1	1	1	0	0	0
jg3306	4869	5796	5410	4118	4201	3424	1313	1421	1483	2748	3855	4474	4010	4145	4349	3848	5044	4469	3230	3088	3047	2794	2871	2703	2450	2086	2276
jg3307	73	73	80	88	81	78	29	31	27	80	60	46	65	76	66	77	65	75	65	74	73	57	60	70	42	53	59
jg3325	568	602	691	1263	1210	978	297	383	355	512	788	829	827	893	755	860	947	841	861	854	840	555	684	750	535	536	516
jg3326	1301	1521	1393	269	345	349	474	426	603	1230	1337	1100	860	709	640	804	789	498	330	208	201	274	162	212	217	203	136
jg3327	26	45	38	36	40	20	21	22	27	21	29	46	35	39	40	46	50	16	17	27	14	13	26	7	24	13	4
jg3328	721	833	903	733	720	576	258	267	340	492	553	854	693	685	668	684	741	674	412	553	407	335	460	420	463	369	267
jg3330	372	326	394	1790	1691	1398	676	774	822	1049	1317	1411	909	1068	1191	897	1033	873	2500	1773	2052	1066	1540	2053	763	915	817
jg3331	202	209	222	918	1010	782	348	360	460	552	696	722	572	591	614	507	603	520	650	733	622	520	670	830	387	356	292
jg3333	2008	2572	2311	1894	2200	1615	906	920	1022	1410	2057	1774	1852	1786	1981	1653	1778	1606	894	906	901	865	1035	902	768	701	550
jg3334	15	3	4	1119	1199	982	161	231	217	585	667	423	702	613	664	748	668	509	466	380	351	391	360	142	131	161	108
jg3335	241	350	284	264	359	208	34	63	67	200	305	116	252	245	198	236	259	247	378	265	267	280	312	225	413	550	442
jg3336	60	96	88	234	231	188	38	68	98	163	242	107	179	242	194	238	310	221	280	313	386	276	384	360	527	259	412
jg3337	2996	3005	3128	2957	3005	2248	1610	1498	1604	3482	6278	6564	9414	8380	5541	10003	10705	7681	386	1621	401	4471	2192	1056	9253	4743	6246
jg3338	22	26	13	4	2	1	1	1	3	0	0	5	5	4	9	13	8	3	72	25	55	16	29	105	31	26	51
jg3339	2214	2578	2340	2425	2455	2085	834	894	1058	1644	2119	1761	1633	1613	1464	1451	1698	1455	2138	1661	2039	1252	1776	1671	1341	1363	1253
jg3340	1490	1721	1630	1296	1428	1101	761	831	984	2062	2218	2028	1712	1655	1621	1846	2049	1388	997	834	883	1426	1273	748	1414	1382	1228
jg3341	841	971	890	939	1165	886	354	455	477	782	948	492	542	577	555	525	568	500	566	442	621	363	456	481	443	386	382
jg3342	10	11	10	1187	1212	953	269	325	384	478	384	477	210	238	315	207	273	179	277	461	371	176	244	459	176	169	159
jg3343	1063	1133	1261	1543	1508	1144	362	549	503	749	1434	1177	1945	1435	1394	1624	1672	1465	7409	2271	6794	1824	2549	3268	1116	990	936
jg3344	0	1	0	12	12	10	3	8	8	7	4	12	12	18	16	20	28	10	37	45	42	20	37	40	25	22	10
jg3345	0	0	0	2	1	0	3	0	1	12	17	20	34	45	22	47	29	11	44	25	70	27	35	12	20	25	29
jg3346	334	295	293	514	501	435	136	230	226	382	530	497	615	592	513	633	737	722	723	539	752	770	811	617	1088	1060	959
jg3347	760	923	925	689	802	643	324	274	365	577	645	581	295	358	492	282	361	350	359	386	255	234	367	260	440	604	402
jg3349	50	27	20	638	708	474	179	236	218	255	353	322	254	316	291	225	262	279	637	489	556	313	431	617	200	152	161
jg3350	17845	21455	21212	6228	6640	5907	6851	6685	8439	16152	22590	20193	13497	13925	11451	15496	17784	11369	9605	10845	11067	8518	10042	10714	12641	10409	7583
jg3351	1660	1911	1932	176	206	157	300	294	303	638	944	673	631	446	416	581	620	424	40	108	56	124	113	51	189	176	110
jg3352	55	71	82	120	102	100	37	27	43	44	72	111	77	105	135	76	185	133	486	155	396	82	169	162	166	110	129
jg3354	0	5	8	45	56	17	11	34	28	29	26	13	11	11	4	6	3	6	15	14	14	11	30	14	11	5	7
jg3355	292	398	209	122	112	70	49	73	57	69	113	69	30	31	43	21	45	31	13	6	8	9	5	28	8	4	4
jg3356	115	113	125	946	851	695	339	436	408	422	481	473	337	285	329	319	329	260	230	298	265	165	192	445	169	120	114
jg3357	1228	1462	1499	1134	1184	1035	376	438	481	1120	1379	1298	1199	1187	1323	1299	1884	1750	1057	1036	933	1214	1201	947	1089	1084	1387
jg3358	13	24	14	58	65	41	18	13	32	39	100	129	198	144	250	284	271	213	17	20	7	186	83	25	91	30	39
jg3359	130	105	120	187	165	154	66	94	112	268	337	451	368	321	384	220	274	257	56	52	81	158	96	39	108	63	121
jg3360	717	979	854	644	706	572	324	318	457	938	991	650	745	739	641	779	774	694	1263	870	1316	567	974	1045	699	572	537
jg3361	346	421	511	754	848	450	170	300	246	531	408	245	247	219	238	254	369	181	551	402	767	411	447	452	207	257	205
jg3362	796	958	805	974	1108	932	257	288	360	669	776	614	548	588	562	564	641	568	1843	1033	2264	606	1108	1218	452	414	444
jg3364	173	178	144	870	869	681	172	270	242	396	416	384	326	400	447	303	296	321	571	450	541	286	405	511	189	238	208
jg3365	976	1232	1108	592	712	456	253	344	395	778	952	534	640	563	512	465	530	374	245	311	352	246	311	289	350	393	297
jg3366	288	353	309	267	319	238	96	132	155	264	283	257	236	229	264	213	307	188	159	205	227	188	327	327	296	342	299
jg3367	297	346	291	443	483	490	319	293	345	597	456	649	356	316	239	364	316	176	72	101	76	122	151	140	152	110	116
jg3368	293	390	338	276	252	282	180	201	210	331	324	481	330	299	345	279	340	326	158	184	223	154	182	169	162	138	124
jg3369	8	7	12	23	15	21	5	10	6	10	17	13	84	104	61	110	150	145	474	568	520	318	752	836	726	704	676
jg3370	2484	2781	2778	2213	2143	1843	736	940	809	1834	2490	2048	2636	2454	2478	2254	2928	2225	2068	1840	2231	2634	2559	1969	2893	3132	3315
jg3371	11	10	24	2809	3095	2594	470	711	750	482	435	167	59	61	61	92	61	39	16380	4601	10048	166	1428	15617	207	434	278
jg3372	968	1272	1139	791	672	642	481	443	493	739	794	842	1225	1031	788	1512	1512	1258	35	97	31	376	148	68	927	390	617
jg3374	1038	1162	1092	769	753	665	252	260	334	665	967	616	822	823	741	815	985	831	473	437	484	493	572	405	788	649	721
jg3376	52	77	76	639	619	489	223	205	228	353	425	417	296	380	302	305	314	339	536	543	505	291	492	575	246	231	158
jg3377	4	6	4	55	59	56	20	38	33	20	29	46	34	28	25	39	33	21	42	62	50	24	43	51	25	14	11
jg3380	1117	1453	1118	989	1129	879	777	730	998	1591	2057	1556	1485	1469	1327	1633	1867	1295	589	859	800	960	824	675	1006	951	637
jg3381	374	416	361	302	278	204	105	109	129	303	330	244	283	267	219	238	279	243	827	213	1447	293	458	201	171	231	294
jg3382	0	1	0	0	0	0	0	0	0	0	0	0	0	0	0	0	0	0	0	1	0	0	0	0	0	0	0
jg3383	17	6	13	270	288	211	43	76	67	118	120	144	123	124	161	125	157	114	152	166	149	133	183	175	109	61	70
jg3384	3958	4202	3981	1017	958	918	331	363	396	607	628	484	328	331	472	296	322	271	537	477	647	508	488	612	1020	1019	1288
jg3385	944	1094	1015	630	611	533	484	463	572	945	960	752	844	758	698	812	758	669	416	660	555	406	479	494	515	539	437
jg3386	64	74	145	84	76	59	53	70	60	80	126	82	69	102	71	71	153	79	26	83	53	21	49	53	36	70	33
jg3387	6	4	11	31	26	22	11	13	15	8	21	20	24	38	17	36	11	20	73	67	45	22	32	51	15	22	24
jg3388	83	121	134	534	527	350	338	334	371	1555	2148	1368	2237	1500	1476	1890	1861	1258	286	452	287	505	412	386	1263	589	1076
jg3389	797	983	922	1003	1054	816	510	550	595	952	1014	945	1062	946	820	1015	1001	1034	877	834	757	956	1132	872	1158	1042	1023
jg3391	7	12	14	21	21	14	7	6	15	13	14	12	10	6	6	6	11	14	11	10	13	8	10	20	20	5	18
jg3392	0	6	6	7	4	1	2	0	0	1	3	5	3	0	0	1	2	0	1	5	0	0	0	1	1	4	0
jg3393	5	10	6	353	327	184	374	574	680	1438	877	996	207	339	315	258	352	340	10648	8801	11406	5776	7742	9665	3819	4722	3549
jg3394	122	147	98	62	47	49	43	24	35	76	88	142	98	92	84	60	87	82	28	28	21	53	40	37	42	57	26
jg3395	1866	2234	1927	488	563	496	485	511	519	1149	1497	1496	1207	1086	958	1226	1270	878	245	323	266	418	404	343	572	490	391
jg3396	989	999	950	256	290	242	247	261	309	593	801	595	443	379	429	601	524	470	53	204	127	187	246	131	512	508	444
jg3397	78	140	66	60	67	60	30	22	23	10	11	16	15	44	19	5	20	40	4	1	3	2	3	4	6	5	2
jg3398	1777	2183	1935	1237	1228	1044	797	790	933	1423	1798	1595	1698	1549	1377	1784	1638	1374	1887	1319	2163	1143	1473	1445	1307	1117	921
jg3399	148	148	145	1422	1646	1277	484	619	705	672	742	660	496	453	498	299	380	276	810	493	729	151	252	376	113	150	69
jg3400	9573	11426	9986	9675	10497	9049	5120	4890	5985	10328	11958	11185	9910	11153	8538	10405	10764	9392	16000	12758	11294	25800	28565	9423	18087	21726	12350
jg3402	2247	2772	2392	2039	2078	1771	1802	1686	2233	3463	3364	3261	3095	2617	3167	3395	3054	2301	2652	2135	2955	2067	2316	2342	2483	2440	1756
jg3403	754	905	909	642	695	549	401	405	581	907	912	823	687	665	642	934	883	613	669	656	629	664	775	528	732	744	524
jg3404	1688	1971	1696	2575	2807	2241	894	960	1103	1893	2400	1844	1714	1708	1805	1757	1873	1588	4727	2075	4750	1688	2440	2172	1688	1497	1517
jg3405	95	172	123	97	112	95	94	96	129	136	181	143	171	128	152	201	148	81	157	114	142	117	137	154	140	104	90
jg3406	250	320	350	140	122	116	108	104	115	281	304	221	262	250	289	345	323	276	124	232	154	260	270	171	294	388	301
jg3407	786	807	835	1040	1121	800	375	366	383	547	896	927	953	1026	856	855	1005	837	979	795	795	842	970	772	1028	878	883
jg3408	631	674	657	593	633	542	191	229	232	435	558	468	534	496	474	462	542	509	585	404	522	438	467	432	588	549	524
jg3409	780	825	894	620	667	514	266	286	313	364	563	383	369	378	357	326	344	350	868	438	819	296	457	420	370	460	338
jg3410	1024	1154	1010	1019	1145	960	487	567	558	966	1239	1248	1343	1297	1328	1313	1387	1495	1316	1128	1090	1194	1370	1139	864	932	826
jg3411	790	1093	1042	1785	1747	1358	495	578	628	650	981	932	811	831	901	846	838	762	666	830	686	940	796	756	1025	814	749
jg3412	11	3	2	1	1	1	0	0	0	1	0	3	5	2	0	2	2	3	8	2	5	7	5	3	6	6	19
jg3413	2599	3247	2734	985	983	885	908	947	1006	1804	2377	1984	2491	2056	1974	2180	2069	1727	871	1155	1005	875	1123	1213	1619	1427	1468
jg3414	7	1	6	24	25	15	8	19	16	76	84	31	56	99	73	151	491	199	2376	12171	3483	23217	24571	16972	11973	41702	73854
jg3415	1864	1852	2059	644	639	495	256	264	319	456	732	897	565	627	605	455	672	639	506	260	335	273	336	296	206	180	182
jg3418	7241	7902	7983	5393	5465	4435	2123	2241	2339	4328	6326	5957	5719	5189	5286	5480	6085	5294	2496	3244	2977	2680	3053	3043	2631	2211	2215
jg3419	982	1153	1101	965	980	833	434	509	642	1037	1152	1136	886	876	819	797	874	717	1117	825	1195	681	909	819	566	605	524
jg3420	4074	4696	4325	4453	4882	3859	2460	3132	3247	5606	5001	4275	3862	3447	4316	3784	3977	3294	3993	3545	4040	3754	4015	3658	3387	3231	3397
jg3421	6917	8444	7691	3102	3190	2784	2518	2627	2992	4827	5195	5652	4977	4501	4508	5700	5066	4202	3940	4480	4476	2972	3686	4516	3201	3255	2512
jg3422	7409	10399	10090	2981	3169	2763	1679	2440	2148	5724	5641	4357	4888	4760	5994	5262	5335	4199	1507	2118	1922	10405	6597	1419	13668	10741	11226
jg3423	780	809	852	678	764	579	223	300	301	581	829	425	482	543	428	479	493	520	465	402	517	416	419	418	503	491	449
jg3424	1	6	7	64	58	64	3	9	4	12	28	39	92	66	69	324	153	60	25	5	8	170	109	153	12712	3732	3907
jg3425	3338	3663	3515	2996	2832	2484	964	1100	1039	1907	2546	3468	2804	2809	2786	2487	2977	3071	3117	1779	1999	1672	1882	1973	1638	1260	1372
jg3426	97	94	80	67	84	68	44	49	26	48	51	98	64	62	84	62	83	61	48	33	61	45	47	40	40	33	26
jg3427	48	48	69	107	151	110	26	58	35	103	132	87	101	103	96	143	144	163	703	334	296	334	360	299	518	414	554
jg3428	1255	1469	1317	547	561	523	535	431	640	1080	1065	956	882	713	722	903	867	615	744	641	896	522	755	533	591	528	436
jg3429	70	110	83	32	36	16	10	11	8	16	22	42	34	14	20	30	26	23	24	16	18	12	16	16	16	33	30
jg3430	1642	1846	1758	3955	3869	3189	678	920	927	1301	2194	1687	1558	1743	1663	1309	1833	1809	8759	1648	8060	1979	3962	1933	1911	1597	1899
jg3431	318	263	292	204	214	140	87	112	109	143	220	91	183	154	151	115	139	132	110	105	119	85	64	48	226	110	87
jg3432	1857	2159	2178	2602	2907	2538	638	744	802	2042	3186	1908	2108	2210	2044	2110	2667	2723	14041	3611	17657	3173	7381	4379	2062	1693	2022
jg3433	1901	2190	1828	882	869	808	467	491	555	861	1133	1163	781	741	814	717	817	707	1649	700	976	1044	1165	910	1367	1316	1180
jg3434	0	0	1	1	0	2	1	1	0	0	0	5	0	4	0	0	0	0	0	0	2	0	0	0	1	0	0
jg3436	2225	2477	2231	3465	3399	2801	1083	1252	1339	2327	3031	3099	3038	3099	2863	2790	3485	2952	2045	2032	1775	1743	1807	1531	1658	1196	1418
jg3438	2	0	4	3	3	0	3	0	0	0	2	0	3	3	0	0	3	5	1	0	1	0	0	3	2	3	11
jg3439	197	206	168	377	397	333	102	118	102	186	210	168	136	146	163	150	204	213	349	244	234	216	300	210	257	287	271
jg3440	469	455	531	873	839	735	241	316	294	423	532	464	474	502	456	350	532	536	764	480	626	569	689	563	535	526	520
jg3441	15	19	18	19	29	12	6	7	9	26	25	19	30	28	11	26	24	21	17	22	22	16	10	31	9	12	7
jg3443	299	262	319	531	541	425	195	199	219	433	550	571	666	629	607	676	782	768	526	778	623	732	833	742	996	738	782
jg3444	118	173	151	254	302	224	92	91	151	337	362	226	391	326	314	452	470	321	154	220	145	207	207	165	264	200	249
jg3445	2628	3360	2868	2252	2288	2043	1204	1210	1647	2610	2852	2476	1771	1917	1975	1725	2061	1595	1836	1711	1907	1247	2026	1829	1470	1627	1436
jg3447	379	367	373	711	810	565	264	299	321	669	834	697	826	777	767	732	979	835	724	842	1036	613	655	633	761	612	677
jg3448	5112	5512	5379	6776	7191	6056	2144	2187	2464	5257	5668	4579	4112	3935	3880	3896	4655	3734	3228	3012	3248	3465	3874	3451	5271	4332	3560
jg3449	8358	8532	7741	9861	10259	8006	3142	3345	3281	5940	7629	7121	7255	7461	7767	6910	7824	7074	8533	7901	8325	7167	8572	8657	7432	7517	7122
jg3450	1114	1417	1106	125	129	94	90	89	131	287	375	381	280	265	240	217	279	151	26	22	16	54	35	25	68	62	43
jg3451	729	900	913	1218	1190	830	518	486	547	1277	1294	3174	1280	1573	1353	1720	3565	1326	259	1146	454	999	991	640	1408	1277	1226
jg3452	1	0	0	5	1	1	0	0	2	0	0	12	0	2	2	1	3	0	0	0	0	0	0	0	1	1	5
jg3453	189	241	218	907	912	654	200	234	235	548	859	946	1183	1292	857	989	1324	1213	1117	840	826	506	609	549	695	431	670
jg3454	371	543	476	403	355	364	229	235	281	352	550	541	501	474	401	397	465	448	405	281	262	385	453	315	522	435	460
jg3461	1	0	0	2	1	0	0	0	3	2	0	0	0	1	0	2	0	0	2	0	6	0	0	3	4	2	1
jg3463	2959	3367	3472	3740	3650	3125	1138	1333	1459	2291	2822	3007	2543	2369	2541	2274	2373	2367	2552	2142	2193	1656	2241	1914	1960	1893	1801
jg3464	3711	4010	4061	3874	4014	3195	1273	1491	1690	2172	2716	1941	1918	1806	2082	1494	1863	1535	2202	1478	2334	1320	1570	1857	1242	1139	1173
jg3465	2	1	4	0	0	1	1	2	0	0	5	6	0	4	0	2	0	0	0	0	0	0	0	0	2	2	0
jg3466	951	1088	977	134	132	109	139	152	163	333	731	392	422	334	253	406	399	328	25	61	27	130	67	46	256	177	153
jg3468	340	358	336	485	473	344	210	225	239	388	486	437	388	413	429	332	438	336	229	217	170	181	208	215	166	156	136
jg3470	10	14	16	102	102	101	20	22	26	77	82	90	102	119	110	162	220	135	181	213	185	206	266	158	399	291	326
jg3471	1632	1898	1865	2680	2652	2211	1034	1181	1299	2191	2703	2209	2064	1890	1980	1905	2268	1725	1307	1523	1150	1050	1234	1307	853	914	716
jg3472	7	5	4	26	23	10	10	10	8	12	9	12	15	20	5	22	8	11	21	15	10	46	23	23	51	14	22
jg3473	44	43	42	563	563	400	125	177	178	268	312	238	249	259	246	228	244	272	311	319	262	172	287	285	160	122	147
jg3474	1	0	0	2	17	15	7	0	0	6	8	0	12	0	9	0	3	5	9	0	0	0	8	19	12	19	27
jg3475	0	0	0	1	0	0	0	0	0	0	1	4	2	3	0	0	1	0	0	0	1	0	0	1	0	0	0
jg3476	1334	1633	1426	149	191	129	138	130	162	346	369	180	365	211	280	291	260	197	36	50	47	58	47	41	110	95	81
jg3478	174	203	199	1320	1174	1018	446	581	541	627	653	833	433	507	577	388	492	467	706	776	677	328	553	663	238	185	143
jg3480	2005	2283	2141	1663	1778	1431	543	694	686	1133	1832	1359	1540	1548	1465	1458	1633	1368	1943	1178	1546	1109	1346	1221	1237	893	1068
jg3481	3	1	1	9	8	7	2	6	3	7	11	24	15	6	17	11	7	19	10	9	11	10	12	12	29	18	15
jg3482	349	397	357	475	459	373	178	199	228	271	436	520	450	440	357	370	576	342	387	346	363	292	340	326	409	350	420
jg3483	339	350	321	1543	1684	1235	396	438	532	691	788	807	745	761	732	912	1147	862	989	1027	1061	660	1047	1292	741	627	662
jg3486	99	135	119	1271	1310	1103	323	387	382	571	647	651	581	595	602	555	542	498	872	805	761	451	588	816	287	260	202
jg3488	345	376	386	1010	1162	879	232	238	276	482	654	568	455	483	432	415	501	407	629	445	503	335	430	398	362	349	214
jg3489	3	5	6	11	5	8	0	5	4	4	8	2	1	1	2	0	2	2	0	0	1	1	0	0	1	3	0
jg3490	3	0	0	5	1	2	0	0	0	0	0	1	0	1	0	1	0	0	0	0	0	0	0	0	1	0	0
jg3491	167	196	170	2101	2228	1665	532	708	677	882	1049	767	771	917	939	711	813	804	1563	1305	1389	732	894	1269	445	475	336
jg3492	1059	1220	1188	1485	1566	1196	301	397	461	757	1036	617	552	574	568	426	531	491	696	691	737	508	600	502	659	687	591
jg3493	1122	1240	1332	1534	1643	1178	397	404	421	823	1279	1044	1127	1252	1114	1152	1444	1432	1777	1140	1406	1628	1641	1418	1866	1763	1747
jg3494	107	96	92	962	1019	651	209	313	250	293	410	368	216	252	223	180	214	163	437	359	334	195	266	393	130	104	129
jg3495	106	84	89	424	426	292	144	193	181	181	240	188	260	254	259	238	237	221	229	227	195	154	167	218	90	102	55
jg3496	1	0	2	17	11	10	2	2	12	2	6	6	5	10	9	4	6	7	17	15	11	5	7	13	4	4	7
jg3497	7	12	12	57	72	54	15	17	13	17	34	49	41	24	34	30	36	22	67	35	39	25	44	50	24	16	19
jg3498	238	314	237	83	75	59	20	27	21	55	59	99	62	82	49	46	54	67	76	51	31	72	42	39	43	136	48
jg3499	0	3	6	46	42	42	19	9	27	43	55	40	33	50	44	51	67	69	55	122	50	117	79	61	94	251	56
jg3500	846	933	1102	337	412	363	215	235	325	334	493	411	337	271	396	280	303	202	141	242	227	384	300	275	395	514	468
jg3501	367	433	407	188	171	177	137	122	155	304	289	244	251	275	277	276	329	258	192	293	215	251	379	427	535	536	368
jg3502	0	0	1	5	8	8	2	5	2	3	12	4	9	8	7	7	5	8	10	6	3	13	9	12	13	2	4
jg3503	23	9	30	229	199	187	47	61	67	93	123	98	60	67	75	68	94	99	102	130	102	85	120	134	67	76	58
jg3504	1052	920	831	851	853	630	172	211	214	388	522	275	425	435	391	295	367	366	632	212	568	132	223	176	175	173	188
jg3506	98	145	143	165	151	158	72	65	93	107	120	83	107	93	116	54	84	81	428	143	236	127	151	111	113	114	61
jg3507	4	11	11	20	22	22	13	3	1	16	14	9	4	2	1	6	5	7	7	9	6	6	22	5	3	16	5
jg3508	22	30	40	2794	2720	2165	782	1115	1227	1312	1104	1451	811	798	953	858	1036	913	2930	1922	2490	718	1014	2294	422	498	436
jg3509	21	22	12	185	236	167	198	208	174	511	434	369	278	256	275	288	217	228	109	229	136	278	401	187	294	409	320
jg3511	131	149	146	634	662	487	178	241	226	189	347	262	213	262	225	179	157	140	122	174	145	97	121	167	52	113	60
jg3512	305	358	318	203	178	154	103	98	113	267	423	237	405	525	592	443	588	533	332	474	414	484	568	421	779	851	689
jg3513	317	331	532	415	521	338	331	302	289	587	802	652	704	717	1140	789	560	602	1400	1014	779	2790	3649	1489	2888	1936	1568
jg3514	34	43	47	72	75	65	17	26	31	29	55	63	55	38	61	39	76	80	93	51	68	72	71	63	65	63	79
jg3515	624	795	697	1037	1166	923	324	374	427	557	872	812	849	822	938	906	926	980	1320	910	1047	1106	1249	799	930	1194	808
jg3516	203	255	155	191	241	190	49	65	87	85	115	105	95	105	110	88	111	114	104	79	99	107	86	87	60	55	54
jg3517	3058	3669	3467	1160	1289	1001	757	843	1061	1724	1813	1400	1758	1712	1644	1461	1284	1259	1277	1095	1253	845	1273	1194	1049	1014	964
jg3518	673	868	682	459	513	438	244	248	257	470	757	533	547	528	405	547	607	469	314	327	415	317	390	365	424	369	407
jg3519	65	93	81	205	216	218	50	69	77	112	127	146	133	133	134	130	135	157	230	186	215	125	164	250	82	66	101
jg3520	2890	3472	3178	8665	8967	7584	2241	2580	2758	4127	4745	5024	3852	4498	4595	3972	4772	4595	7661	6934	7740	4483	6282	7217	2789	2603	2779
jg3521	49	77	51	43	52	43	18	15	27	60	80	147	50	64	82	48	121	106	39	65	65	50	76	58	115	114	108
jg3522	950	1141	1067	1394	1350	1259	374	419	417	747	1209	1947	1167	1171	1165	1103	1504	1062	1247	658	713	489	577	742	437	331	386
jg3523	893	957	817	1220	1281	1110	347	351	435	916	1538	839	1083	1019	851	859	1294	1132	6731	854	6817	997	1810	953	585	500	775
jg3524	229	183	202	337	414	321	54	88	69	139	160	114	99	75	94	39	58	54	34	51	41	27	29	29	43	23	25
jg3525	2193	2647	2328	897	992	774	617	570	684	1266	1873	1588	1359	1084	1117	1397	1311	932	235	443	362	433	455	393	439	382	339
jg3526	405	487	465	364	300	335	180	212	222	332	314	505	307	341	275	291	340	245	602	524	536	318	545	649	360	389	408
jg3527	1211	1660	1452	882	1003	829	768	789	908	1292	1353	1277	924	837	834	1029	939	742	1033	1015	1349	1030	1318	809	1078	1111	765
jg3528	4	4	3	934	882	1183	1128	1368	1239	7811	9507	6209	8568	9948	7666	7545	7284	8258	8574	1020	1475	2507	2807	2293	2107	1086	1000
jg3529	1226	1252	1252	1997	1993	1830	641	719	758	995	1475	1583	1577	1810	1548	1674	2027	1783	2191	1989	1982	1540	2107	1975	1870	2097	1492
jg3530	378	406	418	656	717	489	152	185	215	358	504	381	348	373	362	305	390	359	597	439	501	333	405	385	326	328	301
jg3531	2034	2302	2249	2359	2350	1983	859	882	950	1933	2758	2464	2463	2750	2684	2381	3018	2488	2307	1706	1788	1705	1954	1751	1943	1635	1584
jg3532	151	175	158	239	232	204	142	195	225	263	289	339	246	237	240	150	205	149	258	208	207	109	287	272	185	277	282
jg3533	174	205	184	139	134	137	65	113	125	205	198	179	143	174	99	131	155	113	96	110	133	67	74	109	75	92	94
jg3534	33	23	46	2179	2692	1864	605	949	865	2270	2446	1537	1569	1574	1690	916	1209	895	4430	770	1484	433	1007	551	171	302	210
jg3535	189	230	204	222	204	185	74	97	108	86	173	212	113	154	161	96	180	173	144	96	64	70	61	63	82	66	17
jg3536	181	186	163	334	316	332	145	168	198	239	298	274	204	209	234	169	189	163	170	223	200	119	162	184	97	101	62
jg3538	1096	1522	1329	577	585	482	372	402	443	787	989	807	931	863	661	1048	916	666	584	706	755	521	702	600	769	686	462
jg3539	166	138	143	1294	1254	1086	177	220	200	490	947	1117	406	499	387	383	671	909	2915	740	1393	1608	970	747	608	505	715
jg3540	491	321	373	3426	3098	2628	372	466	511	1166	2790	2738	1042	1330	1033	1054	2217	2523	7668	2010	3797	4358	2434	1968	1517	1392	1886
jg3541	1943	2692	2453	693	717	575	450	464	449	992	1061	942	851	774	701	909	972	767	440	606	428	585	689	601	836	734	657
jg3542	211	206	255	1216	1145	866	67	65	59	220	545	209	178	204	167	153	294	401	800	341	418	615	536	289	647	471	459
jg3543	1819	1765	1927	1077	1093	930	164	197	199	563	986	439	772	560	560	475	664	587	984	498	695	414	638	393	508	465	453
jg3544	109	139	95	159	173	156	43	58	47	86	166	126	170	121	156	136	175	138	174	168	139	154	193	191	175	167	174
jg3545	4729	6277	4885	10481	10672	8941	2875	3087	2743	5201	8746	8573	7705	6796	5191	5929	6507	6025	546	962	470	1527	1046	492	2082	1328	1688
jg3546	1281	1579	1492	583	619	461	532	451	620	1290	1305	1056	1106	996	877	1387	1183	827	678	709	849	720	749	732	843	685	702
jg3547	2747	3497	3057	816	889	769	694	743	893	1810	2132	1527	1587	1423	1307	1425	1684	1184	684	782	629	648	735	771	994	872	750
jg3548	10	14	5	14	17	13	18	2	12	30	37	25	60	59	37	68	56	63	17	26	17	37	35	23	34	50	43
jg3549	11	9	10	17	30	20	3	21	9	24	27	25	8	21	5	20	23	17	106	94	158	102	138	145	41	51	47
jg3550	5091	6568	8313	1756	2289	1924	3724	3904	5066	12641	15170	11587	19347	22238	22154	34773	31540	27028	2791	2852	3334	38979	14628	168	62029	37184	27232
jg3551	1202	1833	1858	364	391	347	87	82	103	229	209	181	110	110	75	95	132	120	38	52	23	25	45	35	45	44	23
jg3552	0	2	1	1	0	0	2	0	0	2	0	0	1	0	0	0	0	0	1	0	0	0	0	0	0	0	0
jg3553	0	0	2	0	1	0	0	0	0	0	0	0	0	1	0	1	0	1	1	2	2	1	2	1	0	7	3
jg3555	735	760	903	335	343	271	95	132	100	271	306	169	322	268	321	175	265	204	118	100	87	85	93	98	41	49	53
jg3556	59	76	84	76	70	73	36	19	34	65	75	78	67	63	52	82	63	54	70	67	57	41	67	59	54	36	55
jg3557	507	613	512	549	534	430	190	182	219	463	626	496	516	493	429	440	499	433	497	422	485	353	415	463	396	410	339
jg3558	3	0	1	1	12	5	7	6	6	10	11	10	22	20	27	57	54	30	145	118	131	89	129	147	74	55	96
jg3559	1866	2549	2220	246	286	201	335	365	407	697	933	728	766	630	502	797	676	472	108	247	175	207	184	279	444	321	257
jg3560	945	1211	1102	932	976	883	648	694	855	1345	1469	1316	1267	968	1019	1352	1090	957	1697	1141	1642	936	1024	1393	700	553	435
jg3561	1501	1471	1682	5344	5093	4426	1360	1733	1677	2704	2443	2385	1536	1490	1600	1394	1419	1250	1349	1108	1022	1324	1615	1080	1774	1849	1747
jg3562	3166	3633	3766	2041	2070	1889	694	776	894	1499	2293	2104	1932	1828	1679	1719	1812	1603	2822	1593	2551	2585	2652	1658	1854	2405	2054
jg3563	60	42	61	23	37	21	0	13	5	10	14	13	6	2	1	2	0	1	8	1	1	3	2	4	0	0	4
jg3565	88	83	91	53	63	38	18	24	24	62	73	51	77	70	54	43	73	48	62	23	41	73	59	33	62	35	51
jg3566	40	52	78	46	15	23	10	30	15	39	36	18	26	41	12	22	28	23	13	18	26	24	39	11	41	27	36
jg3567	65	76	106	63	66	68	49	31	44	95	111	61	114	110	79	83	90	109	52	62	59	95	67	51	58	45	46
jg3568	1381	1513	1471	1236	1240	1157	387	466	418	940	1307	860	1133	1190	1091	1110	1286	1131	525	560	517	559	707	472	518	330	459
jg3569	263	293	248	185	171	129	81	86	90	188	260	170	225	214	182	217	219	198	92	113	85	100	120	91	75	56	68
jg3570	1	6	4	25	24	20	13	17	7	16	11	14	10	10	13	22	20	16	12	19	20	13	25	15	9	20	15
jg3571	50	57	55	254	271	253	72	78	110	208	194	182	174	164	202	229	254	196	155	220	224	145	219	237	184	241	207
jg3572	36	44	52	15	18	14	3	11	14	40	28	161	80	148	116	154	154	108	53	72	79	85	121	53	45	29	32
jg3573	5039	5036	4972	11667	11911	10125	3336	4171	4114	8114	8407	8398	8423	8799	9274	9944	10303	8725	28579	30737	27191	17339	18817	35052	10155	11027	10417
jg3574	282	221	238	827	805	634	528	501	467	2581	4000	4659	7624	6438	5395	7014	7673	6515	263	1499	343	2204	1475	1144	2770	2207	2266
jg3575	89618	99744	87432	134855	138277	122715	51347	55282	58774	134360	161978	126773	110849	103771	105303	107697	124071	93462	48144	59339	45070	85199	75223	53560	93320	63208	53759
jg3576	2104	1750	2725	12274	13164	11728	3078	3708	2090	12480	10005	7178	6598	5717	7157	4450	6750	5165	9308	3617	4657	4300	9300	5386	6094	4096	3552
jg3577	11	6	16	1244	1275	1309	1183	1477	723	2073	1425	1900	1622	1407	3060	563	1348	1429	108	194	367	358	381	408	846	791	461
jg3578	42	53	51	253	238	238	52	90	82	125	172	138	114	121	115	99	119	85	117	114	78	75	71	108	53	42	31
jg3579	30	23	20	72	96	88	29	19	36	48	67	51	41	47	41	49	49	25	48	42	42	29	35	33	21	17	9
jg3580	7008	6036	6811	5216	4832	4797	3573	3221	3996	4923	6047	7940	7404	6899	6847	10846	10212	6523	32373	15382	24546	6074	9364	21768	6103	6427	5020
jg3581	21	5	18	17	22	20	8	4	9	10	32	39	62	68	50	56	103	57	98	45	92	50	67	75	74	74	72
jg3582	0	1	1	1	0	0	0	0	0	0	0	0	1	2	2	1	3	0	1	0	0	0	1	0	5	0	1
jg3583	173	187	198	900	1058	773	251	308	323	427	412	486	280	310	360	210	290	276	277	224	306	123	190	236	73	106	65
jg3584	480	548	562	2540	2710	2099	657	787	797	859	1306	1314	962	1184	1146	912	1050	910	1781	1336	1476	895	1199	1434	479	449	424
jg3585	1223	1126	891	932	933	662	215	307	322	479	590	516	414	366	524	258	366	332	358	287	346	203	200	218	195	192	170
jg3586	134	181	164	566	526	417	131	161	150	213	258	260	225	258	271	165	197	199	204	179	150	93	134	139	52	36	65
jg3588	568	573	601	1604	1552	1195	314	458	441	465	574	613	496	527	589	343	461	463	670	531	522	297	389	514	213	195	147
jg3589	4762	5063	5392	3416	3622	2973	1637	1870	2109	3655	4412	3846	3287	3190	3073	3414	3827	2922	1959	2637	2618	2876	2647	2157	3827	4049	3178
jg3590	214	225	200	3125	3205	2907	1751	1744	1901	3620	4101	3893	3519	4062	3088	5057	3806	3461	2754	3412	2313	6989	7841	2656	5542	5957	4670
jg3591	25	58	23	426	536	385	164	181	262	320	413	406	473	384	515	717	882	632	435	963	617	835	881	489	1637	2488	1955
jg3592	110	108	103	968	1065	753	473	511	603	507	702	729	501	506	600	497	533	406	678	522	564	379	487	610	250	305	255
jg3593	987	1147	994	933	996	876	395	382	490	777	998	832	844	820	803	730	951	827	810	687	738	686	864	684	819	745	648
jg3594	22	28	21	445	448	431	125	163	153	417	382	227	257	148	181	191	136	146	895	148	196	289	350	278	146	362	234
jg3595	19	64	8	13959	14709	10949	1759	2382	2211	4342	6340	5430	3696	4719	4555	4783	3165	6502	27877	5756	3271	8058	11226	3720	5451	2425	3004
jg3596	244	279	223	1005	909	705	334	408	394	723	1164	1120	1266	1267	1247	1202	1573	1299	1378	1139	988	1304	1576	1508	1347	1113	1344
jg3598	2017	2047	2342	2432	2452	2052	840	1040	976	2114	2776	2785	3070	2944	2689	2892	3432	2795	2453	2412	2336	2183	2415	2290	2326	2038	1803
jg3599	53	38	36	393	430	316	113	87	114	73	121	128	99	114	164	91	122	132	208	151	159	102	117	144	72	71	37
jg3600	202	206	223	1593	1651	1173	229	327	296	442	603	554	380	587	524	394	473	571	867	553	675	406	540	545	252	315	231
jg3601	651	745	773	883	829	686	251	370	308	486	743	656	582	556	472	502	552	490	561	457	502	434	632	451	558	601	472
jg3602	2053	2857	2317	825	979	792	765	716	1240	1860	1673	1480	1221	1081	1249	1230	1149	710	1321	811	1444	648	1055	816	753	856	687
jg3603	9333	14478	11521	3906	4749	3797	4618	4333	6618	9370	8595	8069	6510	5864	6384	7465	6021	3817	4523	4685	5375	3679	5434	4368	3674	3731	3279
jg3604	342	513	386	208	232	181	153	146	206	299	316	196	255	190	224	178	180	155	189	176	239	130	202	200	175	209	178
jg3605	173	215	164	144	106	114	32	31	42	67	86	50	80	52	55	60	83	74	65	81	64	59	55	68	92	71	67
jg3606	1	1	1	2	3	0	0	3	2	4	1	0	2	4	0	5	2	5	0	5	8	2	7	4	1	4	1
jg3607	1	5	7	80	60	45	10	9	13	25	40	39	32	23	16	30	37	41	54	19	20	17	22	43	16	17	17
jg3608	3433	3544	3735	5478	5240	4312	1876	2364	2366	2929	4069	3847	3563	3951	4028	3641	4469	4044	16797	9623	11963	6940	10436	10613	5086	4200	5239
jg3609	4	4	4	11	5	9	5	2	2	3	5	20	1	4	1	5	2	4	6	4	3	5	4	15	6	9	6
jg3610	505	532	528	311	284	238	175	204	172	316	421	370	298	354	326	282	422	351	616	262	559	239	357	222	323	315	284
jg3611	1312	1483	1331	1325	1378	1068	311	347	321	538	869	881	734	889	835	590	895	861	917	708	784	510	636	566	625	529	462
jg3612	6	4	4	45	54	35	28	23	35	17	37	48	29	31	29	35	36	23	24	52	38	25	36	40	22	29	14
jg3613	27	25	25	146	167	112	56	74	59	88	130	106	100	117	151	74	130	64	99	115	85	60	70	115	51	57	27
jg3615	2446	2832	2665	1420	1608	1270	950	1148	1077	1800	2656	2460	2074	1897	1688	1819	2018	1623	900	1173	946	1274	1304	1137	1250	1100	924
jg3616	318	411	358	1062	1083	832	399	510	526	661	753	789	671	646	754	571	714	615	898	941	799	615	812	997	607	725	656
jg3617	523	565	565	728	729	513	184	179	221	382	454	221	301	291	312	232	295	246	316	302	345	164	256	280	119	139	117
jg3618	46	70	65	39	47	33	13	20	10	20	23	18	9	25	23	36	26	6	172	99	113	113	125	229	100	148	87
jg3620	2	3	0	6	3	13	0	1	3	1	3	7	1	4	7	0	0	4	5	6	6	14	7	1	1	0	5
jg3621	408	391	358	1579	1580	1232	270	381	397	510	719	664	510	606	627	518	629	540	1086	608	705	796	764	615	592	673	620
jg3622	98	109	78	140	145	142	47	67	60	144	102	131	178	223	233	265	403	431	704	598	627	746	774	590	1118	1071	1056
jg3623	4716	4588	4790	4283	5892	4506	3095	3319	2986	14287	15807	13896	22732	23876	20891	19599	23951	20920	2808	5613	2058	19650	13367	7324	9211	8225	6190
jg3624	322	349	420	106	150	64	61	88	103	146	249	289	215	377	237	584	351	334	56	227	83	570	234	108	838	1039	761
jg3625	0	2	2	6	13	6	3	0	1	1	1	1	3	6	16	2	4	15	3	8	3	7	10	5	9	1	3
jg3626	43	61	50	17	19	15	16	21	15	18	44	64	26	43	38	111	16	51	9	18	12	81	6	16	145	178	102
jg3627	819	862	951	493	496	426	666	469	885	635	779	789	652	423	517	768	697	385	179	169	139	143	93	194	275	199	227
jg3628	466	665	574	146	169	159	144	181	178	401	406	472	400	380	335	487	389	280	121	141	213	172	160	167	229	176	118
jg3629	326	354	329	281	299	205	160	187	234	623	558	477	627	533	430	510	591	431	361	263	409	294	292	261	420	419	359
jg3630	579	609	758	379	389	247	458	442	529	543	737	859	1092	981	771	955	980	883	627	641	612	635	720	692	572	586	468
jg3631	484	544	730	679	697	552	303	244	275	409	507	392	385	546	400	383	580	351	426	297	178	388	532	169	155	167	92
jg3632	233	262	297	460	455	345	273	264	297	427	637	532	753	908	552	684	864	471	722	359	251	756	785	582	165	151	79
jg3634	1186	1324	1449	991	908	739	604	509	588	895	1303	1378	1451	1307	1225	1696	1572	1262	676	912	767	1070	1246	991	1328	1189	1047
jg3635	0	0	0	9	27	12	8	9	5	17	11	18	44	75	55	68	97	99	244	190	138	288	431	251	634	557	692
jg3636	84	78	97	222	219	202	35	55	37	102	147	101	230	179	159	141	246	218	388	223	238	317	335	270	369	337	380
jg3637	118	106	90	1508	1448	1045	395	450	444	589	601	696	458	561	634	449	518	364	1448	719	1025	440	580	647	206	230	204
jg3638	2	0	1	37	42	30	8	11	7	14	16	10	7	12	17	5	7	20	23	9	13	8	5	6	3	5	4
jg3639	17	14	10	494	479	457	95	156	158	222	273	212	150	186	207	92	160	123	292	228	205	147	186	215	82	88	74
jg3640	0	0	2	8	7	10	2	5	3	6	1	3	5	9	6	7	5	9	9	10	10	16	35	11	22	33	49
jg3641	11	19	19	151	132	92	29	49	35	201	162	291	535	539	370	437	623	452	273	210	206	282	331	163	298	200	269
jg3642	0	0	0	2	2	1	1	2	2	2	1	0	1	1	0	0	0	0	4	1	0	0	3	0	0	0	0
jg3643	0	0	1	24	32	11	5	1	5	9	11	9	16	23	31	52	51	36	3661	2956	3591	3196	4558	6286	3085	5232	2835
jg3644	1936	1725	2455	5710	5959	4078	1670	2321	2803	4366	4334	3121	1960	2382	2148	2153	2490	1814	8004	6987	9697	5850	6376	7800	3622	5802	3700
jg3645	0	0	0	0	3	0	0	0	0	0	0	0	0	0	2	3	0	1	280	203	131	573	763	838	890	1003	897
jg3646	2	1	0	5	5	14	0	0	0	2	0	4	21	23	12	121	104	41	3143	2118	3132	2111	2972	3634	2542	3690	2843
jg3647	2	1	2	1	5	0	0	2	0	6	10	2	11	14	3	88	58	28	5460	3894	5396	5376	7778	11121	8981	15052	10944
jg3648	1	2	2	2	1	1	0	0	0	0	0	0	1	3	8	3	2	0	3	0	7	2	4	0	13	12	33
jg3649	0	0	0	5	1	8	0	0	1	2	3	1	2	2	0	0	7	1	1	4	0	1	4	2	7	7	12
jg3650	0	0	0	2	0	0	0	1	0	0	0	0	7	0	0	0	2	0	1	6	0	1	0	5	49	55	133
jg3651	1452	1824	1535	1571	1596	1372	582	621	623	1243	1899	1514	1287	1432	1296	1149	1627	1387	1799	884	1348	1250	1137	972	1006	1257	1008
jg3652	69	68	59	121	125	91	21	40	48	56	46	41	20	28	28	13	24	19	16	35	37	11	21	6	19	8	10
jg3653	232	280	248	1363	1530	1224	339	472	464	474	622	652	485	563	522	464	537	498	846	650	675	382	608	693	278	298	219
jg3654	284	309	281	768	766	858	236	236	148	450	684	1037	1062	893	943	547	718	682	224	215	134	210	230	179	104	92	91
jg3655	2	6	3	5	5	5	1	2	0	2	3	15	10	6	8	6	4	3	4	4	0	2	4	3	2	0	2
jg3656	9769	13450	11131	7827	8393	7325	3915	3652	5020	10040	10620	10301	7566	7869	7497	8719	7923	5785	19584	13958	20580	6914	10474	16993	4011	5312	4929
jg3657	881	889	948	1929	2116	1569	306	454	382	784	1226	689	803	922	889	706	977	1046	5267	1095	7103	1144	2477	1418	1055	934	904
jg3658	227	193	180	552	571	389	40	71	56	96	283	123	124	168	169	102	184	222	1120	254	1226	304	539	264	249	168	206
jg3659	149	154	123	159	165	147	105	108	96	195	282	327	438	389	306	451	531	396	60	63	60	321	234	83	358	237	318
jg3660	10	10	8	52	59	41	15	16	10	37	48	25	25	17	16	13	20	18	11	10	2	19	15	22	41	44	54
jg3661	13891	15178	13900	18164	18411	16307	6784	7389	8068	15951	18364	15676	12465	12194	12445	12003	13983	11224	12935	10799	12307	10545	13483	11946	13070	10049	7904
jg3662	713	836	876	644	717	529	292	333	476	712	865	536	630	571	562	700	792	608	773	513	785	562	661	609	719	758	659
jg3663	3856	5245	3961	2062	2537	2086	758	842	848	1578	2618	1388	1719	1376	1320	915	1366	872	340	479	330	489	666	426	908	1393	942
jg3664	3	5	0	0	1	1	0	0	0	1	4	0	4	0	0	0	2	6	0	0	0	0	1	0	2	1	5
jg3665	0	0	0	0	0	0	0	0	0	0	0	0	0	2	1	0	2	0	0	1	0	0	2	0	0	2	0
jg3666	0	0	1	0	0	0	0	0	0	0	0	0	0	2	1	0	2	2	0	2	0	0	4	0	0	2	3
jg3667	0	0	1	0	0	0	0	0	0	0	0	0	0	2	0	0	0	0	0	1	0	0	2	0	0	0	0
jg3668	40	38	13	45	43	49	4	3	5	26	16	18	19	7	18	7	16	37	27	5	3	8	24	8	50	22	14
jg3669	20	26	37	15	15	20	6	9	4	25	35	13	30	29	30	28	49	19	44	40	12	37	35	34	64	60	69
jg3670	182	176	154	218	224	183	74	53	81	171	197	182	248	206	282	189	188	202	250	237	211	307	286	298	322	384	465
jg3671	0	0	0	0	0	0	1	0	3	2	2	1	6	8	2	0	14	13	33	17	19	3	10	9	5	26	12
jg3672	0	0	0	1	0	0	0	0	0	0	0	1	0	4	4	2	4	4	13	5	12	1	4	6	8	2	0
jg3673	0	0	0	1	3	0	1	0	0	1	1	0	0	0	3	1	0	0	6	7	4	8	4	5	4	12	9
jg3674	1	3	4	4	2	2	2	1	6	3	1	7	7	7	15	10	30	25	52	40	46	61	71	60	128	174	195
jg3675	2838	3406	3108	684	760	603	607	687	845	1870	2195	1686	1664	1500	1445	1624	1708	1118	503	706	612	700	672	743	886	967	754
jg3676	2577	3466	3096	972	1088	999	539	644	712	1157	1734	1398	1598	1957	3002	1406	1842	1622	7519	2190	5681	4216	6079	2596	4652	4388	3123
jg3677	1890	2358	2309	2002	2089	1668	651	818	764	1442	1812	1852	1719	1712	1805	1597	1832	1654	2384	1197	1780	1466	1798	1227	1445	1420	1318
jg3678	81	108	97	113	105	95	52	61	65	168	165	173	198	338	309	247	268	218	188	261	208	217	227	200	242	287	177
jg3679	87	128	86	220	238	192	72	114	121	228	273	125	208	213	171	162	250	180	197	169	199	131	248	193	164	137	139
jg3680	109	106	102	36	32	26	19	16	10	74	82	57	63	29	62	46	66	52	23	35	3	64	55	38	176	142	84
jg3681	44	85	53	94	119	106	26	53	43	133	162	54	79	102	122	28	141	142	93	127	130	25	203	126	244	346	293
jg3682	53	24	48	33	23	21	9	11	34	72	93	69	40	51	44	33	49	49	35	46	62	36	62	33	72	174	169
jg3683	254	223	302	57	79	46	54	32	60	160	205	149	150	136	110	191	170	120	102	119	93	185	152	65	290	349	265
jg3684	0	0	0	4	1	2	1	3	0	14	26	2	34	176	200	34	69	81	56	86	136	189	156	125	336	355	342
jg3685	0	0	0	1	3	5	0	1	1	6	3	1	12	20	9	5	9	15	9	19	11	62	22	12	88	47	61
jg3686	0	0	0	1	0	5	0	0	6	5	5	2	5	9	4	7	13	14	1	7	8	38	17	17	62	2	1
jg3687	3	0	0	4	4	6	3	0	1	4	4	2	0	1	0	2	4	4	10	8	11	14	25	9	20	17	18
jg3688	0	0	0	0	2	1	0	2	0	3	1	3	4	5	5	6	5	13	3	9	3	14	13	1	24	21	20
jg3689	8	7	9	5	3	5	3	3	0	6	6	7	1	4	5	4	6	2	5	10	8	29	14	10	13	12	26
jg3690	17	1	13	4	3	4	0	0	5	0	2	4	2	0	3	4	2	2	2	1	0	3	1	4	2	9	1
jg3691	173	138	101	14	5	9	1	0	0	11	6	15	14	4	11	3	3	7	2	3	5	0	1	4	5	16	25
jg3692	380	442	381	146	161	138	144	165	164	293	286	208	301	256	187	253	222	162	147	208	243	128	178	190	248	250	189
jg3694	391	443	394	2426	2526	1804	707	842	793	1268	1625	1513	1305	1481	1392	1183	1479	1502	1871	1505	1557	1189	1589	1742	744	687	661
jg3696	239	324	255	261	321	250	138	125	166	273	306	256	273	286	199	282	288	217	176	176	125	279	384	166	218	318	225
jg3697	134	85	208	150	161	85	63	55	63	175	186	111	155	154	140	127	158	158	140	126	101	120	128	99	171	127	137
jg3698	11834	15154	13773	8030	9371	7388	4865	4974	5878	16614	20608	15035	18059	20216	17591	22593	26305	20287	7820	14076	9994	12920	12949	9123	15826	16191	13054
jg3699	3190	4288	3964	2011	2533	1937	1277	1289	1449	4150	5479	4358	5166	5859	4713	6280	7465	6859	2603	4056	3227	3851	3957	3065	5549	5384	4036
jg3700	7492	9665	7297	7122	8099	6510	1898	2192	2447	4488	5991	4625	4079	4422	4560	3652	4794	4094	13616	4606	9836	4733	7334	4487	3059	2945	3062
jg3701	353	450	487	579	613	496	122	178	141	258	455	653	367	495	476	363	589	451	590	353	411	318	367	430	279	232	220
jg3702	0	0	0	1	6	11	0	0	1	1	0	2	0	1	0	2	2	2	3	2	1	1	3	4	3	0	0
jg3703	0	0	0	0	0	0	0	0	0	0	0	0	0	0	0	0	0	0	0	0	0	0	0	0	0	0	0
jg3704	0	0	0	0	0	0	0	0	0	0	0	0	0	0	0	0	0	0	0	0	0	0	0	0	0	0	0
jg3705	0	0	0	0	0	0	0	0	0	0	0	0	0	0	1	0	0	0	0	0	0	0	0	0	0	0	0
jg3706	0	0	0	0	1	0	0	0	0	0	0	0	0	0	0	0	1	0	0	0	0	0	0	0	0	0	0
jg3707	0	0	0	0	0	0	0	0	0	0	0	0	0	0	0	0	0	0	0	0	1	2	5	1	0	0	0
jg3708	1281	1681	1459	1627	1505	1259	990	1065	1439	1967	1868	1734	1531	1446	1618	1829	1646	1139	4971	2622	5828	1628	3218	2941	1086	1241	1080
jg3709	13	14	24	46	25	25	14	10	12	22	35	62	22	17	18	25	34	24	17	17	18	11	8	13	8	9	8
jg3710	1190	931	1148	4766	6486	4100	1113	1671	1716	2314	2267	1413	1053	1715	1203	408	783	621	747	583	489	194	198	163	51	53	63
jg3711	1172	854	1069	4605	6056	3997	1184	1618	1577	2669	2486	1948	1267	1803	1477	480	835	719	886	710	607	212	206	123	37	68	46
jg3712	9131	10638	9843	5573	6282	4936	3358	3579	4062	9037	10913	8914	8630	8180	8373	9871	10468	8755	6219	7072	5923	7265	7369	5948	9062	8303	7478
jg3713	8	6	14	4	5	3	0	0	0	14	15	14	4	4	5	5	11	27	10	11	11	14	9	12	21	23	15
jg3714	88	98	95	86	73	63	25	29	29	46	68	67	54	82	56	69	78	60	135	98	112	86	86	110	50	78	156
jg3715	2024	2417	2044	1476	1465	1159	383	411	606	679	994	906	773	839	641	887	778	758	1677	553	1232	812	932	587	790	818	645
jg3716	170	164	165	288	355	272	116	127	160	380	459	315	483	505	563	494	655	665	317	422	317	427	479	341	762	741	711
jg3717	29	25	19	73	76	78	8	19	20	26	23	44	29	12	50	33	35	19	144	50	78	29	50	58	80	79	85
jg3718	29	22	19	63	72	57	16	5	14	11	28	19	10	7	23	4	8	11	53	5	20	2	10	14	1	2	0
jg3719	793	927	919	4236	4082	3559	1616	1959	2122	1790	2387	2671	1516	2041	2127	1476	1683	1628	3989	3213	3304	1896	2740	3616	1017	1055	948
jg3720	1411	1655	1396	1807	1893	1448	667	732	785	1627	2356	1929	2108	1869	2026	2001	2379	2011	1542	1593	1354	1307	1717	1800	1023	1029	806
jg3722	24	29	39	20	35	21	6	6	6	23	39	44	33	35	25	26	35	49	28	30	25	17	24	50	28	25	9
jg3723	1332	1576	1637	623	714	806	655	634	696	1631	1964	1462	1772	1263	1938	1510	1875	1704	1285	1143	1268	1243	1657	1492	2095	2373	1689
jg3724	166236	141860	127420	268178	255712	237003	100690	116118	121269	259153	243276	214396	216065	222824	239539	253706	322663	254467	159820	195515	150573	435838	373110	95748	388885	256340	381128
jg3725	1187	1311	1223	1674	1705	1306	549	758	768	1438	1577	1172	1076	1066	1031	889	1113	985	1904	1735	1877	1467	1794	1766	1797	1862	1764
jg3727	350	344	451	582	474	471	238	303	270	264	329	382	387	387	373	350	431	362	683	363	564	252	286	324	199	156	159
jg3729	1225	940	1013	1883	2042	1838	473	582	570	1097	1097	919	672	612	706	500	587	514	628	595	500	441	408	672	529	376	546
jg3730	20	7	11	3	1	0	4	4	10	2	7	20	3	5	2	5	4	3	1	4	2	1	1	1	2	2	3
jg3731	767	897	1284	52	58	27	25	11	26	34	21	25	151	120	114	102	159	75	44	17	19	22	20	16	6	4	3
jg3732	98	137	93	261	275	207	95	134	134	162	194	225	166	208	215	171	190	168	166	172	117	115	124	148	48	37	45
jg3739	0	0	0	3	1	0	0	0	0	0	0	0	0	0	0	0	0	2	1	0	0	0	0	1	0	0	0
jg3741	3368	3530	3133	1735	1953	1575	663	735	731	1554	2422	1943	1748	1540	1503	1368	1835	1473	826	873	911	770	752	691	801	779	631
jg3742	473	633	552	292	325	230	185	176	246	584	497	417	439	422	424	422	425	329	265	242	226	214	294	252	297	357	203
jg3743	450	525	478	310	390	251	190	151	214	507	503	422	424	341	380	404	385	283	194	259	213	176	207	225	291	206	180
jg3744	1	3	0	2	1	0	0	0	0	1	1	9	1	1	0	3	4	1	0	1	0	0	0	1	2	0	1
jg3745	1650	1456	1827	3579	3392	2827	1312	1505	1531	2028	2816	2832	2444	2602	2295	2158	2908	2591	6951	4227	6798	3331	5313	4998	3570	3574	3549
jg3746	128	205	160	245	280	196	180	174	176	264	390	386	439	437	283	590	550	334	407	619	443	188	424	480	298	269	288
jg3747	1008	1178	1239	1167	1407	1175	483	575	480	1494	2013	1574	1586	1332	1339	1001	1263	1187	144	422	195	540	655	277	1037	767	596
jg3748	596	720	684	849	847	680	158	198	203	367	608	470	549	600	575	540	669	581	1329	427	888	622	779	593	899	824	740
jg3749	5120	6186	5186	2514	2702	2212	773	700	901	1827	2951	2162	1959	1754	1663	1438	2175	1638	1282	614	1007	826	734	935	738	512	891
jg3750	3	6	2	9	7	1	0	0	1	1	0	3	0	0	0	5	1	2	5	1	4	2	0	2	0	0	2
jg3751	15073	14360	24500	7449	9542	6740	4782	4524	4031	13617	25004	15070	15120	12832	15543	8853	11823	9887	666	673	478	878	948	753	383	10	9
jg3753	2	6	2	4	0	1	0	0	0	0	3	1	6	2	0	1	1	1	3	2	2	14	12	6	143	182	283
jg3754	139	163	119	254	243	209	55	88	106	104	134	96	74	49	44	46	53	32	58	46	46	45	73	33	33	24	33
jg3755	4186	4192	4837	3342	3226	2706	697	929	872	1242	1908	1568	1406	1304	1193	996	1440	1240	1111	1166	983	1224	1463	969	1437	1350	1157
jg3756	35	24	11	242	199	184	38	44	51	86	77	65	44	62	73	55	48	38	118	87	109	65	100	126	32	43	29
jg3757	27	22	35	2185	2203	1528	687	815	859	1084	1068	1143	841	925	906	761	941	844	1308	1213	1197	817	1181	1302	434	516	358
jg3758	1	2	2	7	5	3	1	0	1	2	3	3	3	1	0	2	2	3	0	1	2	2	0	1	0	0	0
jg3759	2	7	8	6	9	8	0	4	2	5	7	1	5	2	6	4	3	3	11	2	1	4	9	5	1	0	1
jg3760	562	852	775	609	549	481	307	376	407	597	657	707	358	448	391	509	415	352	628	445	295	812	1408	438	1415	1556	1974
jg3761	3582	4465	4055	466	608	515	801	831	1017	2037	2455	2019	1977	1453	1410	1715	1630	1141	267	540	384	524	573	573	630	709	581
jg3762	2416	3629	2741	1357	1485	1125	1662	1696	2666	2686	2754	2990	1836	1873	1988	2356	2113	1266	2720	2098	3390	1189	1446	1696	1207	1181	875
jg3763	28	32	21	25	23	19	0	11	10	10	9	7	6	13	5	5	10	5	3	2	2	2	3	4	0	6	5
jg3764	9	3	19	975	1000	814	318	306	267	3014	2569	5580	33064	33272	30446	36432	44479	34422	192	669	130	10060	3480	246	19633	5426	13456
jg3765	80	62	76	111	164	122	58	73	86	130	155	117	170	123	121	131	178	142	154	91	179	164	197	137	195	179	209
jg3766	13	20	29	4	9	4	1	6	10	5	14	5	4	6	3	8	8	2	0	3	4	1	4	0	3	0	1
jg3767	390	459	572	1143	1264	806	332	403	428	505	776	668	751	739	791	605	707	657	562	521	549	368	457	446	167	174	194
jg3768	91	90	122	85	105	65	32	48	62	81	127	57	70	58	58	48	47	44	91	69	108	52	79	64	87	88	92
jg3769	3	6	15	3	4	4	1	2	8	0	0	3	1	3	0	1	1	0	1	1	1	1	0	2	2	0	0
jg3770	2	7	0	1	3	1	0	1	0	1	0	5	4	2	8	1	8	4	1	0	2	2	1	7	20	37	24
jg3771	10	1	5	2	5	0	3	4	0	4	2	24	38	71	25	85	53	33	93	59	97	88	46	17	27	14	22
jg3772	13	18	14	7	10	0	1	1	3	0	0	0	0	1	1	0	0	0	0	0	0	0	0	0	3	4	1
jg3773	1050	1211	1129	1083	932	749	397	437	422	756	1002	1003	1125	1077	996	1217	1178	991	1143	927	1242	1083	1186	928	1136	1048	965
jg3774	4266	5233	4659	1752	2082	1752	1295	1495	1576	3524	4702	3529	3378	3396	2635	3439	3557	2789	1149	1990	1292	2359	1883	1195	3034	2300	1853
jg3775	6	10	12	4	4	9	1	0	1	3	8	1	3	3	3	4	7	3	3	8	3	7	8	4	5	7	0
jg3776	0	0	0	1	1	2	0	0	0	1	2	5	3	3	2	2	2	2	2	5	3	0	4	1	0	0	6
jg3777	2747	2942	3066	2703	2816	2211	778	881	925	1240	1594	1716	1471	1506	1491	1385	1898	1651	1656	2079	1660	1171	1751	2027	1293	991	957
jg3779	40	65	36	231	236	211	55	83	53	97	94	80	69	92	86	66	68	84	195	130	161	79	119	156	54	45	53
jg3780	4855	6200	5874	2451	2627	2268	2191	2239	2705	4532	5731	4613	4594	4363	4336	5619	5541	4152	1947	3622	2669	4150	4109	3034	5227	4970	3813
jg3781	0	2	0	100	93	87	22	34	25	47	69	49	72	59	83	58	74	70	189	66	119	53	76	17	103	53	153
jg3793	8	10	26	0	1	0	0	0	0	0	0	0	0	1	1	0	1	0	0	0	0	0	0	0	0	0	0
jg3794	78	93	140	50	51	39	32	29	26	25	43	34	43	30	35	16	30	24	46	38	30	16	24	34	10	6	9
jg3795	4615	4440	4761	2479	2535	1955	446	536	540	1217	1417	990	1042	1007	962	628	857	879	534	463	491	260	346	386	178	163	156
jg3797	1689	2036	1746	1511	1555	1293	851	874	1107	1662	1875	1549	1238	1115	1256	1214	1307	863	1842	1170	1854	969	1528	1164	924	852	853
jg3798	36	60	71	347	385	316	191	188	223	333	344	402	226	279	284	220	266	274	433	476	326	293	462	671	290	309	352
jg3799	234	309	322	180	174	136	101	111	129	225	218	212	187	166	191	174	179	142	204	159	223	123	203	178	152	187	140
jg3801	262	298	330	328	421	298	105	114	94	231	262	232	244	247	251	185	252	232	328	165	199	208	246	184	201	210	225
jg3802	3931	5864	3638	962	1088	874	929	786	982	1859	2234	2104	1698	1604	1518	1724	1557	981	346	764	388	587	716	490	808	813	545
jg3803	932	1031	971	1158	1216	1020	405	421	449	1282	1414	922	952	907	875	814	1066	832	1273	1026	1214	913	886	1174	967	895	813
jg3804	2	0	4	2	1	0	0	0	0	0	1	0	0	2	0	0	0	1	2	2	0	1	2	5	1	0	1
jg3805	11	13	12	144	155	137	42	33	33	77	70	73	59	76	69	51	70	62	116	87	83	46	53	68	21	31	14
jg3806	40	36	33	635	609	484	144	164	164	252	325	299	242	275	342	240	278	310	524	378	302	240	293	341	163	113	102
jg3812	0	2	1	12	10	7	1	0	0	1	2	2	2	2	2	4	6	7	4	4	7	3	2	3	3	1	1
jg3814	973	895	954	1026	1117	823	290	406	365	617	773	660	701	665	665	650	742	639	1010	488	703	414	534	534	482	428	491
jg3815	241	268	304	143	154	142	108	99	118	284	316	261	341	279	242	349	364	273	212	238	282	336	382	217	360	525	416
jg3816	1	3	0	0	2	0	0	3	0	0	1	6	5	11	4	9	13	7	45	22	244	47	80	352	589	1008	1148
jg3817	824	924	872	1236	1165	1034	442	522	544	1166	1405	1463	1286	1217	1243	1204	1383	1245	987	910	909	888	965	749	1012	900	874
jg3818	772	916	903	1240	1231	960	536	584	674	850	1253	1270	1229	1216	1106	981	1257	1183	1074	906	867	749	898	839	739	658	630
jg3819	21	23	16	35	36	28	14	16	42	26	45	34	56	41	42	31	58	40	28	22	45	16	47	19	40	29	28
jg3820	485	569	470	403	387	339	117	148	144	231	304	291	286	286	285	230	274	242	261	196	184	94	200	220	147	129	146
jg3821	5	4	7	3	1	6	0	1	0	2	0	5	1	2	5	0	0	0	0	0	0	1	0	0	0	1	0
jg3822	0	0	1	0	0	1	0	0	0	0	0	0	0	0	0	0	0	0	0	0	0	0	0	0	0	0	0
jg3827	1	1	2	0	0	1	5	5	1	0	1	2	0	0	0	1	0	0	0	0	0	0	0	0	0	1	3
jg3828	1	1	1	1	0	3	2	0	1	0	1	0	1	0	0	0	1	0	0	1	2	2	0	2	1	4	9
jg3829	0	7	0	0	2	6	3	1	4	0	4	1	5	4	0	2	1	1	0	1	2	0	3	0	0	2	3
jg3830	0	2	0	0	1	1	0	0	0	0	3	4	0	1	1	0	7	0	0	0	2	0	0	1	1	5	2
jg3831	1	2	0	4	10	6	8	2	3	0	3	1	0	1	1	0	2	1	0	5	4	0	1	0	0	9	4
jg3832	1	10	0	4	17	20	2	4	7	3	5	0	2	0	3	0	0	1	1	1	3	0	6	2	0	4	10
jg3833	0	0	0	0	0	0	1	0	0	0	0	0	0	0	0	0	0	0	0	0	0	0	0	0	0	0	0
jg3834	8	18	7	3	20	9	1	1	5	3	8	4	1	4	2	11	1	4	6	0	1	2	2	3	0	4	2
jg3835	6	16	5	13	17	18	0	5	3	8	9	0	3	2	1	11	4	3	5	8	1	6	1	11	6	6	9
jg3836	0	1	0	0	5	1	0	0	0	3	2	0	0	0	0	0	5	0	2	0	0	0	2	1	4	1	0
jg3837	5	4	3	2	3	3	0	2	2	1	1	1	1	3	2	0	9	0	0	2	3	0	4	3	2	0	0
jg3838	3	2	2	0	0	0	0	0	0	0	0	0	1	1	0	0	0	0	0	0	0	0	0	0	0	0	0
jg3840	0	0	1	5	4	2	0	0	0	0	4	1	0	0	0	2	1	2	1	1	1	0	0	2	1	0	0
jg3841	1	1	0	8	20	7	1	6	7	0	4	1	4	1	1	2	0	0	0	0	0	0	0	0	0	0	0
jg3842	3	15	21	3	6	5	3	2	5	0	1	6	9	9	2	6	4	0	14	9	2	32	32	14	0	5	4
jg3843	0	0	1	0	0	0	0	0	0	0	0	0	0	0	0	0	0	0	0	0	0	0	0	0	0	0	0
jg3845	2	4	2	7	10	9	0	1	7	0	3	0	1	1	0	0	0	0	0	2	2	0	0	0	0	5	5
jg3847	0	0	0	0	0	0	0	0	0	0	0	0	0	0	0	0	0	0	0	0	0	0	0	0	0	0	0
jg3848	0	0	3	0	6	0	2	0	0	1	1	0	0	1	0	0	2	0	0	0	0	0	0	0	0	0	0
jg3849	1	1	7	20	24	18	8	5	12	7	20	17	12	8	13	3	10	6	7	9	13	6	7	8	7	24	7
jg3850	1	1	1	0	5	1	1	0	1	2	1	0	0	0	2	0	0	0	1	0	0	0	0	2	0	2	0
jg3851	20	34	35	47	64	35	30	35	37	46	69	26	36	44	29	26	37	27	27	48	42	27	59	33	62	105	78
jg3852	13	14	14	16	9	6	10	8	11	8	12	5	4	1	1	7	0	3	6	18	9	5	10	8	3	11	7
jg3853	1	14	7	9	2	12	10	11	7	9	8	12	3	2	6	5	2	10	3	1	8	2	11	1	5	14	4
jg3854	3	0	0	1	3	0	0	0	0	0	1	0	0	0	0	0	0	0	0	0	0	0	0	0	0	2	0
jg3855	0	0	2	0	0	1	3	0	0	0	0	1	0	0	1	0	0	0	0	0	0	0	0	0	0	3	0
jg3856	2	0	1	5	8	6	9	7	3	6	0	7	17	11	1	33	10	1	24	7	23	26	11	35	13	35	13
jg3857	2	0	3	1	0	3	0	2	1	0	1	10	0	3	2	3	0	0	1	3	5	2	0	2	0	0	0
jg3858	0	0	0	0	0	0	0	0	0	0	0	0	0	1	0	0	0	0	0	1	2	0	0	1	0	0	0
jg3859	9	0	9	0	1	3	0	1	1	0	2	5	1	1	1	0	0	0	0	3	0	1	0	0	0	1	0
jg3860	0	0	1	1	2	0	2	0	5	0	1	3	0	0	0	1	0	0	1	1	0	0	0	0	0	0	0
jg3861	6	5	9	4	3	7	1	2	2	5	2	1	2	2	6	1	0	0	3	0	2	2	0	1	2	0	0
jg3862	0	0	1	1	5	6	1	0	3	0	4	0	0	0	0	0	0	0	0	0	1	0	0	0	0	0	0
jg3863	2	0	0	5	14	17	1	3	3	2	4	1	4	1	2	2	0	0	0	2	1	0	0	0	0	1	2
jg3864	8	13	0	26	53	41	9	7	14	1	9	3	5	0	7	7	2	0	10	0	11	0	2	0	0	6	7
jg3865	28	7	0	29	28	40	2	7	1	13	10	1	2	2	3	1	7	2	0	0	1	0	1	1	3	6	1
jg3867	6	3	0	4	3	8	5	2	0	1	6	0	3	0	6	2	1	0	5	2	0	1	2	0	1	10	7
jg3868	1	2	1	4	0	1	0	0	0	0	3	0	4	0	1	2	0	0	3	0	1	0	0	0	0	2	0
jg3869	0	1	0	0	1	4	0	0	1	0	3	0	7	1	0	0	3	2	6	1	3	0	1	2	2	2	4
jg3870	1	0	0	0	2	1	1	0	0	0	0	0	0	0	0	0	0	0	0	0	0	0	0	0	0	0	0
jg3871	10	5	18	32	21	4	21	15	16	35	3	33	2	0	1	1	2	0	0	3	3	0	4	6	10	1	0
jg3873	0	3	0	0	0	0	0	0	0	0	0	0	0	0	0	0	0	0	0	0	0	0	0	0	0	0	0
jg3875	0	0	0	0	1	0	0	0	0	0	0	0	0	0	2	0	0	0	2	1	0	0	0	0	0	4	0
jg3876	1	0	0	1	1	1	0	0	0	0	0	0	0	0	0	0	0	0	2	0	0	0	0	0	0	0	0
jg3887	1	0	4	10	9	13	0	0	2	1	3	2	2	7	19	0	2	4	0	1	0	0	2	0	0	0	0
jg3890	4	8	0	18	22	11	4	0	4	0	1	6	8	16	2	4	12	15	8	10	15	13	6	11	12	34	17
jg3894	1	2	2	1	1	2	1	0	0	0	5	0	2	3	0	0	1	0	0	0	0	0	3	0	0	0	0
jg3902	17	6	11	23	23	13	1	3	4	2	1	6	4	4	4	2	5	6	1	4	9	1	1	3	5	3	4
jg3903	2	2	2	4	5	5	0	4	6	0	2	0	3	1	3	2	0	1	2	0	2	2	0	3	0	1	0
jg3907	0	1	2	1	4	0	0	0	0	2	0	0	2	0	2	0	0	3	0	4	2	0	1	0	0	0	0
jg3913	1	2	1	6	4	12	0	1	1	3	11	0	0	4	0	1	0	0	2	0	2	0	2	1	3	5	0
jg3914	1	1	2	0	1	0	0	0	0	0	2	1	0	0	2	0	2	0	2	0	2	1	2	0	0	0	0
jg3915	2	0	2	0	0	0	0	0	0	1	0	1	0	0	0	0	0	0	0	0	0	0	0	0	0	1	0
jg3916	2	1	2	1	2	0	0	1	0	0	0	1	3	1	1	0	1	0	0	0	0	0	0	0	0	1	0
jg3917	259	273	356	378	339	298	96	120	121	267	327	368	328	298	277	293	400	380	630	276	427	375	479	372	304	262	272
jg3918	489	524	653	1553	1908	1288	480	634	780	1388	1491	937	1370	1237	1041	1157	1507	1378	1916	1318	1990	1133	1118	1480	533	482	525
jg3920	1	0	0	0	0	0	0	0	0	0	0	0	0	1	0	0	0	1	2	1	0	1	2	2	1	0	0
jg3921	316	341	363	329	332	269	170	139	202	360	367	294	335	262	241	233	266	203	163	252	194	211	231	243	231	230	243
jg3922	1023	1108	1163	380	380	307	296	349	349	586	728	547	613	589	550	545	589	503	472	427	560	449	514	468	1047	798	925
jg3923	166	146	152	79	58	42	27	34	40	66	13	107	21	17	18	60	14	11	43	2	15	37	8	38	28	28	39
jg3925	2	2	0	0	0	2	0	3	3	0	3	1	0	0	1	0	1	0	0	0	0	2	1	1	0	1	0
jg3926	57	74	81	52	45	14	9	26	8	5	7	22	2	11	12	3	0	2	7	5	4	0	0	0	0	1	2
jg3928	10	16	9	5	8	0	4	2	2	5	2	3	0	1	0	1	3	2	0	3	0	3	1	0	0	3	0
jg3929	11	3	6	7	10	0	0	2	0	2	2	0	0	4	2	2	0	1	0	1	0	0	0	0	0	0	0
jg3930	20	13	25	21	13	4	3	8	2	11	3	8	0	1	3	1	3	0	0	2	3	0	3	1	2	3	0
jg3931	34	29	50	45	45	32	5	3	4	11	14	9	4	5	5	10	5	2	11	3	2	10	6	9	4	8	14
jg3932	0	0	0	0	0	0	0	0	0	0	2	0	0	0	0	0	0	0	0	0	0	0	0	0	0	0	0
jg3933	0	2	0	3	6	5	0	1	1	0	5	0	0	0	0	1	0	0	3	0	0	0	0	0	2	7	6
jg3934	0	8	0	4	5	6	5	6	2	1	15	0	3	6	2	5	5	0	2	1	3	8	1	2	0	0	1
jg3935	5	6	6	22	29	17	14	19	14	7	28	6	24	19	45	4	21	40	44	16	15	7	38	34	8	0	3
jg933	1	0	1	3	9	6	0	5	2	4	4	3	5	9	6	4	5	2	10	12	9	13	7	4	4	4	3
jg934	0	0	0	2	1	0	0	0	0	0	0	0	0	0	1	0	0	1	0	0	1	0	1	0	0	0	0
jg935	1	0	1	24	14	11	4	3	10	11	16	9	7	12	8	5	14	15	15	16	9	8	17	26	23	9	6
jg936	1	4	4	3	5	3	2	4	1	5	3	11	12	14	5	8	3	4	13	12	7	10	16	20	2	0	4
jg937	1	2	0	1	0	0	0	0	0	2	0	0	0	0	3	1	0	0	1	0	0	2	0	3	0	2	0
jg939	0	0	0	0	2	0	0	0	0	1	1	0	0	0	0	0	2	1	1	0	0	1	0	0	4	0	0
jg940	0	0	3	5	4	2	7	3	0	4	5	5	2	5	4	0	2	0	1	5	0	1	2	1	1	2	2
jg943	1	0	0	1	3	4	1	1	0	1	0	1	0	0	1	0	0	0	2	0	0	0	0	1	0	1	0
jg942	0	2	0	1	3	3	0	0	0	1	0	0	1	0	2	2	0	0	1	0	1	0	1	0	0	0	0
jg946	14	7	12	20	38	11	11	13	18	16	5	9	9	6	8	19	11	6	12	5	3	4	3	12	2	1	9
jg947	3	2	6	3	1	4	0	0	0	0	1	0	0	1	0	2	0	0	1	0	0	0	1	1	0	1	0
jg948	207	127	224	30	41	22	22	28	22	66	50	85	63	53	68	46	46	51	6	11	9	7	16	6	6	9	11
jg950	17	7	7	13	18	13	6	5	8	12	18	13	14	9	11	7	12	1	3	3	1	3	0	1	7	3	8
jg957	10	6	11	61	48	49	6	13	10	43	40	51	31	31	35	24	41	36	53	47	27	25	47	35	35	23	33
jg958	0	1	0	17	9	4	4	4	4	7	9	2	3	9	6	4	4	1	32	26	18	18	23	22	15	5	5
jg959	3964	5049	4508	3175	3561	3022	2439	2545	3346	4561	4724	3888	3667	3370	3504	4016	3446	2328	2861	2473	3173	1876	2148	2342	1618	1741	1295
jg960	455	544	495	500	589	403	182	169	180	307	427	246	414	398	321	312	357	298	331	274	340	186	267	191	268	204	205
jg961	125	99	102	198	187	108	44	36	36	74	111	73	81	85	92	57	69	64	150	72	124	50	100	88	52	58	29
jg963	1	6	1	1	4	2	0	3	2	2	3	5	1	0	2	5	0	0	0	0	0	0	0	0	1	0	0
jg964	458	503	485	455	489	331	197	247	209	387	575	398	612	578	525	533	613	562	447	298	266	327	296	237	331	255	281
jg965	2	2	2	6	0	2	3	0	0	3	1	6	0	5	4	2	1	1	2	3	10	6	0	10	3	3	6
jg967	480	425	417	596	621	487	186	166	181	367	466	416	433	369	380	363	446	416	1365	556	936	550	705	727	376	254	276
jg968	772	720	732	858	905	783	279	369	352	649	843	724	736	755	734	677	837	742	2558	1016	1896	895	1194	1330	559	397	454
jg970	20	26	37	31	39	25	5	9	17	24	18	16	23	21	33	20	31	16	15	31	14	27	21	17	27	20	19
jg971	281	363	401	333	398	330	192	262	332	372	403	367	290	280	211	256	316	223	490	312	571	164	230	319	213	188	161
jg972	273	327	375	187	245	187	41	59	34	71	103	89	127	128	95	107	119	125	39	46	36	97	99	23	247	227	153
jg973	531	669	685	401	445	358	195	191	267	427	440	404	305	322	272	288	284	287	600	361	693	224	294	264	267	272	191
jg975	48	45	40	116	87	68	57	65	39	89	112	108	106	149	110	99	157	112	110	84	69	157	147	55	157	148	122
jg976	52	55	40	142	181	100	54	68	69	99	180	150	141	165	140	99	149	106	173	130	94	149	199	91	175	164	180
jg977	2558	2792	2624	260	313	274	262	309	247	921	1588	1068	1190	908	602	964	1152	831	54	118	33	205	127	69	488	342	261
jg979	2179	2784	2511	1402	1513	1157	730	733	901	1551	2121	1944	1693	1690	1711	2132	2100	1423	930	1343	1025	1841	1889	1251	2585	2396	1691
jg980	2236	2079	2321	9816	9261	6990	2194	2535	2483	2793	4090	4623	3824	3817	3993	3562	3568	3414	5109	3878	3943	2738	3548	3565	2099	1726	1871
jg983	21	19	28	18	24	30	2	5	7	7	5	16	8	11	16	11	3	10	4	12	3	13	6	12	5	16	16
jg984	1	11	2	4	5	4	2	0	1	0	0	0	1	0	2	4	1	0	5	0	2	1	1	0	0	0	4
jg985	50	47	45	10	15	16	1	8	10	10	38	10	11	9	5	7	10	8	10	5	8	10	11	8	12	11	17
jg986	110	97	85	287	243	216	80	95	83	138	166	129	192	171	174	165	188	164	239	261	179	182	210	342	463	1126	1119
jg987	1623	1922	1598	2300	2220	1695	1224	1227	1500	2068	2930	2512	2254	2093	2016	2532	2667	1949	1898	1926	1765	1879	1998	2066	1453	1414	1148
jg988	705	708	760	672	728	576	288	326	324	476	580	463	500	523	501	487	578	485	356	390	350	281	344	380	258	261	217
jg989	0	4	1	6	9	6	3	1	3	7	2	4	5	2	4	5	3	1	2	4	3	7	3	4	1	1	3
jg990	1355	2068	1331	950	1000	672	221	273	242	455	685	566	565	631	515	444	614	613	406	382	305	419	377	356	509	399	464
jg991	45	65	27	230	252	211	59	63	44	148	146	123	78	102	77	73	93	82	120	103	104	68	136	98	43	31	24
jg992	12	12	0	4	8	4	1	6	8	5	1	1	8	8	5	1	1	0	1	1	5	3	4	3	0	2	0
jg993	104	133	116	97	78	89	66	87	76	57	69	69	69	74	65	79	46	43	15	43	34	30	50	44	44	27	22
jg994	302	386	361	237	278	222	162	182	179	210	197	212	183	152	141	194	147	144	69	166	83	105	142	130	96	78	83
jg995	1783	2351	2068	1706	1782	1435	1870	1918	2145	2749	3009	3403	2464	2723	2238	3327	2713	2245	1130	1641	1245	1701	1886	1245	1290	1414	914
jg996	547	764	711	244	309	252	305	316	410	727	726	585	578	529	522	567	520	413	242	373	426	240	277	275	325	349	272
jg997	124	142	142	100	150	116	88	97	118	206	225	142	205	139	174	198	191	182	179	183	221	213	280	259	312	289	322
jg998	49	28	35	2893	3367	3658	2096	3358	3432	4451	4514	4693	2415	2599	3082	4303	3525	4735	1611	4524	4344	7434	9611	8972	8042	7709	6891
jg999	38	13	20	739	852	909	445	657	679	1104	1082	1150	580	609	705	1046	971	1244	526	1214	1203	1913	2336	2591	2122	2037	1774
jg1000	0	0	0	0	0	0	0	0	0	0	0	0	0	0	0	0	0	0	0	0	1	0	0	0	0	0	0
jg1001	4	11	1	6	10	21	7	2	8	2	11	7	0	0	1	0	0	0	0	0	0	0	1	0	2	2	8
jg1002	0	0	1	1	1	5	10	1	0	2	4	11	3	4	6	3	1	2	0	1	8	3	6	2	10	4	1
jg1003	371	431	456	400	313	259	191	226	274	249	455	506	456	412	424	413	467	315	148	235	189	153	234	199	158	211	185
jg1004	167	176	237	187	179	142	50	48	51	101	168	102	117	165	106	156	158	162	147	125	124	175	182	98	207	186	146
jg1005	99	120	51	6700	6411	7646	4688	4907	4356	13230	18225	14492	13568	14055	14842	13992	12660	18994	8884	7138	7167	9910	14395	9861	1298	3751	2168
jg1006	537	773	963	1888	1435	2041	267	250	299	893	1242	3287	861	1453	1679	1447	2739	2030	1682	900	1463	1208	855	1912	677	632	1688
jg1007	425	534	522	326	366	299	269	236	288	316	552	458	433	400	369	528	456	409	265	355	292	414	442	325	532	494	361
jg1008	92	91	96	669	630	535	211	255	292	217	441	537	210	203	318	191	203	204	402	357	388	218	293	532	115	198	113
jg1009	558	721	675	667	603	587	325	367	482	799	791	877	685	632	717	712	800	624	962	696	1316	586	777	681	565	601	433
jg1010	0	1	0	0	2	0	0	0	0	0	0	0	1	2	2	2	3	0	0	1	2	2	2	3	7	14	13
jg1011	5	4	7	1	5	4	3	5	4	9	8	3	38	39	60	95	76	82	23	25	40	32	47	103	49	140	157
jg1012	1	2	1	134	177	170	163	112	136	593	455	654	648	788	1275	1222	909	1079	501	1331	1418	1566	2550	1269	1889	2378	2278
jg1013	51	48	27	135	135	98	47	48	63	63	102	104	82	87	86	80	100	82	181	105	192	94	153	125	74	83	40
jg1015	619	597	726	2138	2038	1673	611	771	681	1080	1465	1394	1183	1271	1161	1041	1209	1094	2610	1982	2787	1416	2260	2022	937	917	709
jg1017	570	590	575	269	278	230	155	133	160	253	567	474	665	471	446	451	574	448	120	150	110	200	155	109	255	261	169
jg1018	15	11	17	57	44	50	13	12	11	23	18	31	5	13	8	14	21	6	22	14	22	10	13	10	21	28	3
jg1019	414	491	440	209	215	169	128	187	186	335	384	374	397	350	293	335	405	303	109	190	190	181	185	141	192	199	138
jg1020	93	123	125	385	388	389	164	187	186	364	395	434	237	283	241	485	339	280	497	553	447	733	878	328	863	1372	795
jg1021	753	843	767	266	259	199	98	74	118	198	262	245	298	238	346	358	304	299	148	209	134	256	243	199	544	289	270
jg1022	2734	3376	2943	1646	1627	1387	1456	1534	1685	2762	3269	3138	2381	2338	2245	2607	2401	1856	2497	2536	2721	1293	1545	2068	1194	1138	907
jg1023	952	1054	1048	353	413	318	227	242	303	537	524	421	554	443	530	409	524	412	428	267	529	234	306	232	301	286	297
jg1024	356	322	342	474	412	315	59	76	68	124	219	185	156	206	228	191	319	366	685	499	587	501	438	351	779	551	624
jg1025	561	661	612	447	488	324	370	351	372	592	1087	879	1360	1268	1148	1407	1335	1083	461	526	397	556	543	393	413	333	280
jg1026	174	178	187	395	437	295	142	195	170	223	305	290	363	351	322	328	394	354	555	443	423	346	418	432	372	351	364
jg1027	579	678	717	588	586	451	297	319	303	358	569	558	732	716	640	782	692	635	1005	707	877	760	851	659	910	914	827
jg1029	332	431	358	206	183	151	150	135	150	147	186	145	173	188	150	124	128	107	189	155	152	151	136	200	103	84	57
jg1031	635	620	619	1555	1692	1251	793	690	712	1209	1588	1528	1545	1552	1320	1559	1358	1511	1023	1234	885	1696	1624	753	1573	1257	681
jg1032	235	224	227	472	442	305	104	96	104	299	516	435	775	620	443	591	699	640	70	136	121	189	132	53	391	185	356
jg1033	49	33	57	38	39	19	16	8	20	31	30	25	29	36	25	32	35	27	29	20	35	22	24	27	35	29	52
jg1034	170	160	167	332	419	325	215	281	292	391	338	465	294	334	245	495	314	364	604	537	337	925	1015	441	797	1263	855
jg1035	397	413	455	308	331	257	157	159	173	310	372	266	337	257	295	305	267	280	245	266	269	209	240	276	310	328	253
jg1036	113	140	165	144	163	106	68	76	79	131	127	74	162	163	101	94	82	73	100	114	87	71	103	89	91	79	52
jg1037	767	833	738	1457	1499	1140	517	567	618	1506	2246	1782	1951	1882	1411	1386	1733	1411	1021	569	798	912	813	656	1161	840	1160
jg1038	171	204	158	94	88	61	78	74	89	117	152	124	194	120	105	138	143	109	76	114	78	104	80	82	74	95	57
jg1039	189	208	213	1004	1113	974	253	298	335	514	563	518	321	368	521	323	385	385	835	380	986	301	377	459	206	214	188
jg1040	1160	1304	1259	1338	1353	1011	481	516	591	779	1061	1023	1260	947	1034	1077	1072	998	3803	1806	4734	998	1318	2221	769	692	643
jg1041	9	19	29	66	53	32	9	15	5	12	31	20	52	45	72	74	89	106	175	128	291	123	169	93	230	246	235
jg1042	1391	1245	1478	3904	3437	3078	700	944	830	1377	2242	2360	2493	2581	2788	3130	3444	3270	22952	8375	20884	9062	17748	9070	6035	3375	5777
jg1043	42	26	26	17	12	14	6	5	15	7	17	56	17	21	29	11	17	17	6	1	8	7	6	4	12	15	4
jg1044	1370	1609	1412	816	782	659	326	391	425	1009	1336	851	880	908	724	745	856	817	952	702	1041	618	845	568	683	591	633
jg1045	32	78	29	6	5	0	7	1	0	10	9	67	10	5	16	7	8	13	6	6	0	2	2	2	4	1	1
jg1046	5595	6099	5762	1897	1927	1537	1723	1637	1985	3253	4179	3969	4070	3681	3561	3870	3899	3218	2652	2185	2309	1744	2421	2144	2002	1799	1606
jg1047	548	509	620	1095	1286	1044	162	206	162	527	839	578	917	997	1015	960	1265	1105	3499	752	2647	1151	2277	1113	1482	1195	1296
jg1048	906	1223	1144	884	843	833	598	522	861	1312	1248	1158	876	839	792	1145	839	556	1513	908	1834	707	900	1082	527	507	357
jg1049	1272	1483	1518	1635	1674	1311	503	630	554	959	1180	1427	1272	1242	1260	972	1228	1162	944	850	1000	569	654	743	514	470	454
jg1050	450	489	493	506	506	415	151	227	181	304	407	594	390	416	368	284	353	255	220	192	239	139	140	179	93	77	118
jg1051	6508	7394	6799	8500	8953	6964	2908	3471	3776	6968	8853	6959	6361	6137	6440	6843	7658	6552	8707	7192	8171	6671	7684	8323	9422	8812	8297
jg1053	4	4	4	5	12	2	2	1	2	3	2	11	7	7	2	6	5	4	9	1	8	4	0	14	2	3	6
jg1054	2159	2439	2016	765	779	702	624	675	731	1348	1864	1366	947	986	1047	838	1160	1004	1160	538	710	645	626	545	337	410	334
jg1055	148	177	206	267	252	267	123	129	172	327	340	329	375	370	287	346	398	390	376	349	306	398	440	308	475	424	488
jg1056	3341	4019	3434	1114	1122	868	1030	1082	1158	2323	2733	2141	2499	2228	2041	2431	2211	1691	704	1132	1038	1103	1227	1286	1228	1368	925
jg1057	3267	4162	3458	2125	2418	1860	1290	1295	1600	2991	3164	2440	2229	2221	2257	1968	2114	1730	1408	1695	1682	1205	1574	1542	1074	1104	970
jg1058	8041	9083	8189	4407	4288	3949	2589	2791	3151	5244	6431	6108	5420	5263	5407	5567	5901	5188	3648	4024	3616	3756	4482	4275	4324	3821	3236
jg1059	6669	7159	6797	17702	19177	16597	7531	8879	8931	13459	15520	14263	11162	11532	12987	11443	13775	10581	10479	11137	10592	11079	13733	10346	8774	6353	5615
jg1060	0	0	0	22	14	11	1	4	2	2	2	5	1	0	7	0	2	1	0	6	2	4	0	1	0	0	0
jg1061	1	0	2	6	4	1	1	0	0	0	2	4	1	5	1	1	0	2	1	0	0	6	0	0	3	0	1
jg1062	719	890	837	377	430	383	271	230	284	606	645	502	580	449	487	568	609	422	253	295	263	258	256	251	450	406	283
jg1063	529	584	555	239	243	166	83	89	108	239	296	205	235	223	193	200	302	267	225	124	189	127	127	93	194	138	126
jg1064	322	295	290	654	762	590	101	165	115	342	551	369	612	579	461	560	707	710	666	765	784	755	675	587	1060	673	788
jg1065	1562	1963	1732	2518	2650	2190	737	968	1081	2591	2735	2546	2484	5844	8191	3560	4878	3772	7755	6152	6710	8142	10354	7072	10887	11624	10442
jg1066	746	855	717	333	411	292	145	188	205	456	472	317	422	459	398	379	383	375	183	206	145	193	221	178	274	214	222
jg1067	85	73	87	55	60	63	25	35	26	46	33	56	52	43	59	31	47	40	17	9	9	6	7	10	11	13	6
jg1068	939	1271	1145	618	645	481	505	513	731	1030	1218	825	899	781	842	1099	940	633	487	647	565	500	461	529	614	569	477
jg1069	806	794	766	1261	1364	1036	373	443	465	1330	1739	1332	1893	1820	1560	1707	2129	1668	885	830	779	931	915	672	1885	1218	1567
jg1070	650	698	738	848	751	639	292	376	325	518	709	743	662	807	704	661	978	881	1058	837	877	823	933	780	1101	1073	1177
jg1071	15857	18674	17652	2126	2520	1923	2146	2261	2826	6514	8522	6149	5328	4646	4126	5365	5590	3573	622	1366	925	1865	1546	1259	2914	2705	2010
jg1072	489	538	452	276	277	204	164	133	165	361	440	434	438	410	360	343	442	349	99	125	130	113	102	135	107	112	98
jg1073	1832	2437	2000	1042	1127	959	626	779	800	1376	2083	2005	1468	1432	1188	1511	1681	1160	902	977	830	627	544	866	578	566	346
jg1074	1134	1202	1172	877	1038	761	137	173	176	238	348	271	232	235	246	154	229	219	33	64	26	73	78	83	115	92	98
jg1075	386	333	329	503	538	397	254	267	259	312	587	519	655	553	550	610	760	526	194	313	190	376	146	208	418	209	231
jg1076	3	0	4	0	0	1	0	1	0	2	0	0	0	0	0	0	0	0	13	0	2	0	3	4	0	0	1
jg1081	0	1	0	0	2	2	0	0	0	0	0	0	0	0	0	0	0	0	0	0	0	0	0	0	0	0	0
jg1083	0	0	1	0	0	1	1	1	4	0	4	1	0	0	0	0	0	0	0	0	9	0	0	0	5	0	0
jg1088	0	1	0	8	3	1	3	1	0	1	0	1	1	0	0	0	0	0	3	0	4	0	0	0	0	0	0
jg1092	1	5	2	8	14	12	0	1	2	1	7	3	0	1	1	4	0	1	3	5	1	4	0	5	1	0	1
jg1095	28	46	28	136	136	122	24	31	27	72	85	43	35	22	34	8	15	17	7	13	22	12	8	10	31	16	27
jg1096	64	68	64	67	68	72	59	49	80	45	43	73	52	40	50	15	11	28	21	10	19	7	17	19	9	30	25
jg1097	35	56	73	52	41	42	43	49	49	54	31	71	22	31	48	15	15	41	2	14	16	5	8	4	5	11	8
jg1099	9	11	8	10	7	4	6	10	12	15	14	5	8	19	19	32	24	21	22	45	39	30	99	40	74	3	11
jg1100	0	0	0	3	7	0	0	1	0	0	0	1	0	1	1	0	0	0	0	0	2	0	0	0	0	0	1
jg1116	56	26	76	28	21	18	22	33	26	35	2	32	5	11	43	0	0	51	3	0	14	4	1	2	0	0	0
jg1119	5	2	2	2	1	2	0	1	1	0	0	3	0	1	1	0	1	1	0	0	0	0	0	2	0	0	0
jg1131	7878	9660	8860	2276	2444	1804	2240	2153	2393	4624	5906	4858	4547	4367	4068	4964	4525	3611	1460	1971	1832	2042	2455	2362	2235	1918	1674
jg1132	831	793	853	553	653	506	135	130	94	366	575	317	412	493	476	352	570	566	1053	350	932	522	537	405	937	805	817
jg1133	5768	7251	6867	1947	2098	1664	2109	2123	2407	4209	5360	4155	4054	3719	3312	4077	4140	3274	1506	2524	2190	2197	2630	2587	3765	3686	3036
jg1134	8158	8737	7572	10917	9708	9739	4883	5216	5962	9104	10002	11152	8425	8046	8215	10725	10342	7172	27197	23080	25006	14190	21237	29542	7225	8257	8651
jg1135	394	562	370	65	62	58	112	111	126	349	474	199	330	251	228	238	290	170	35	81	52	83	83	71	102	100	80
jg1136	737	836	846	759	859	711	460	588	610	912	1225	1462	1238	1212	1115	1177	1542	1361	970	1021	885	1095	1200	865	1594	1455	1531
jg1137	905	956	1282	1364	1240	1102	389	417	478	733	1462	1005	968	1369	1162	1188	1318	1462	2944	1666	2229	3053	2271	1940	2435	2731	2642
jg1138	300	313	287	640	661	528	160	207	196	435	615	593	687	826	776	759	1046	769	1029	852	1191	1002	1084	1086	1131	1285	1354
jg1139	2734	2930	2766	2378	2401	2003	1005	1154	1154	2330	3271	2595	2913	2616	2411	2378	2883	2251	995	1826	995	1141	1186	1394	1121	893	997
jg1140	11770	13569	12522	16977	18585	15548	5956	6754	7258	14267	16674	12849	11326	10399	11140	10580	12174	9312	6769	7207	6600	7960	7499	6754	10080	7329	6504
jg1141	126	153	139	123	146	129	51	69	99	170	221	177	224	306	330	315	400	533	539	608	675	644	573	512	1326	882	1094
jg1142	826	902	1064	678	659	566	238	267	248	347	572	456	469	547	581	479	563	427	721	455	474	612	709	590	1021	1186	827
jg1143	4812	5460	5166	2926	3195	2457	1230	1387	1380	2655	3555	2438	3005	2507	2775	2734	2738	2292	1645	1577	1811	1561	1816	1596	1989	1804	1866
jg1144	140	191	190	147	193	149	107	110	120	161	162	172	152	127	122	180	120	134	165	105	146	113	141	78	114	129	127
jg1146	0	0	4	2	3	4	2	0	2	1	1	10	6	5	0	0	1	3	8	2	1	19	2	1	8	4	0
jg1147	428	505	618	1421	1452	1325	376	493	535	1659	1547	1086	1218	1148	1063	957	1453	1460	1672	1766	1560	1368	1782	1358	1704	2196	2113
jg1148	723	1085	1176	17255	17005	16273	2810	3530	3567	11827	11345	9141	5392	7446	5723	5697	6071	8190	11474	7762	7611	6734	8223	5934	7931	11805	10545
jg1149	196	160	199	401	378	342	53	97	77	198	409	256	269	382	287	294	323	407	578	255	422	372	329	130	491	543	502
jg1150	295	305	274	421	444	368	141	121	134	279	352	372	419	426	389	362	455	409	887	387	662	519	618	520	590	586	625
jg1154	79	84	87	781	859	576	242	311	247	303	357	488	408	364	407	389	397	354	654	585	588	371	476	593	226	236	158
jg1156	9	8	12	67	70	65	16	22	27	40	32	34	28	38	48	30	32	35	58	38	50	39	41	48	12	17	15
jg1158	144	147	126	1159	1109	945	254	290	327	487	478	581	388	510	480	443	432	501	706	651	620	407	486	706	229	260	208
jg1160	0	0	0	4	1	2	1	0	1	0	0	1	0	0	0	3	1	0	0	3	3	0	1	1	0	0	0
jg1161	327	428	416	278	269	183	104	128	120	198	360	435	436	459	382	448	508	440	384	404	336	379	502	372	582	441	527
jg1162	1631	2015	1705	772	826	616	487	434	588	1069	1334	924	1076	868	863	938	1020	783	467	592	585	549	564	539	779	691	576
jg1163	1099	1363	1364	612	700	557	312	362	431	899	827	597	768	647	690	635	712	517	428	345	393	383	425	350	481	449	451
jg1164	1169	1298	1158	1155	1140	948	409	499	481	1074	1747	1394	1392	1380	1407	1408	2042	1777	2335	1439	2305	1927	2006	1518	2032	2059	1916
jg1165	6608	7493	7703	8419	8400	7183	2821	3377	3505	8348	10370	7335	8865	8304	9109	9310	10999	7660	14202	9171	13707	10677	9954	10609	9012	8026	7840
jg1166	1026	1285	1183	658	700	542	515	535	636	1085	1367	1176	1051	954	887	1003	1097	811	701	571	654	575	653	717	601	592	679
jg1167	8	5	2	8	15	17	5	1	1	34	21	25	26	42	35	41	44	59	130	83	78	185	193	109	132	170	157
jg1168	525	593	700	2725	3513	2677	866	962	972	2401	2184	1785	1479	1728	1579	1455	2195	1841	2659	3856	2260	4456	7406	8226	10928	22826	6862
jg1169	3107	3415	3290	3987	4107	3067	1866	2141	2233	2734	3641	2505	3259	2939	2757	3010	3197	2519	3506	2611	2859	2285	2947	2828	2602	2664	2535
jg1170	295	316	279	458	484	371	180	191	212	266	378	486	336	363	301	337	426	300	441	341	330	339	430	310	400	453	382
jg1171	0	0	0	47	53	89	66	29	58	152	147	137	194	282	256	289	384	610	511	662	530	1469	1807	1151	2403	1441	1703
jg1172	0	0	0	0	0	2	0	2	0	1	0	0	4	3	2	0	0	3	2	12	11	2	7	0	4	8	2
jg1180	1346	1754	1481	681	774	593	598	644	695	1077	1210	1063	1089	992	984	1172	1037	861	444	589	479	524	593	590	629	639	484
jg1181	44455	55645	47151	41548	45656	36980	21487	21901	27110	53947	63736	54200	48476	45164	49074	50217	54116	39792	67198	43838	60012	39913	45623	44349	30407	27184	28893
jg1182	11880	11921	10429	1514	1585	1204	499	604	543	1051	1502	960	997	846	900	646	789	658	316	350	258	292	338	359	214	231	270
jg1184	855	1101	955	463	518	435	542	538	645	1273	1213	985	1209	1006	955	1423	1183	976	402	698	629	848	758	599	803	1003	744
jg1185	0	2	2	1159	1171	1076	508	633	604	1323	1811	1274	1352	1596	1486	1369	1172	1011	1845	1438	1128	2710	2712	822	1796	3086	2530
jg1186	0	0	0	3	2	1	0	0	0	1	3	1	0	1	0	1	3	4	4	2	1	3	2	1	4	2	2
jg1187	0	2	0	0	0	1	0	0	0	0	0	0	0	0	1	0	0	0	3	2	1	0	3	0	3	0	6
jg1188	3	17	9	4	6	3	0	1	3	11	5	1	4	4	3	0	4	0	4	3	3	4	8	8	7	13	23
jg1189	17	21	4	3	4	4	0	3	1	5	5	1	8	7	8	3	4	1	9	18	8	16	21	9	28	17	18
jg1190	2	0	0	17	19	15	2	4	3	25	10	16	21	26	21	19	39	44	39	27	26	59	33	25	35	55	24
jg1191	0	1	2	0	2	1	0	0	0	0	0	2	0	1	0	0	1	2	9	3	1	3	5	5	11	12	16
jg1192	2	7	4	12	17	8	5	6	4	7	13	7	5	13	6	8	4	6	11	5	1	4	8	11	7	0	12
jg1193	7	6	3	7	6	3	1	4	1	8	2	6	3	7	1	8	3	8	15	4	6	13	27	27	21	6	21
jg1194	1	1	2	0	1	0	3	1	0	2	3	0	0	2	4	6	7	9	23	29	22	64	58	34	79	44	70
jg1195	21	8	11	23	57	25	8	8	15	40	35	44	92	74	45	111	125	183	301	187	169	174	181	147	267	195	187
jg1196	8	13	9	36	25	23	8	8	20	63	58	27	88	36	58	62	89	46	134	75	88	102	109	116	165	128	144
jg1197	0	2	0	8	13	14	10	2	8	10	6	6	13	8	5	4	9	2	10	12	6	8	9	17	24	21	8
jg1198	0	0	0	8	9	0	3	21	6	13	19	34	157	122	113	218	200	96	93	64	86	121	98	113	173	180	144
jg1199	57	43	55	32	28	22	13	12	18	46	45	47	31	26	20	43	35	39	17	21	28	38	33	13	51	31	69
jg1200	10	1	3	11	24	19	14	15	18	12	24	13	13	23	35	58	53	20	64	292	141	277	281	270	677	727	506
jg1201	168	197	162	700	704	524	104	140	90	278	379	292	236	347	292	297	388	411	960	408	751	479	588	514	655	642	690
jg1202	8	1	11	932	939	726	261	328	325	487	635	344	234	257	296	198	263	221	135	172	118	130	137	153	51	56	49
jg1203	246	261	253	1009	1045	882	148	213	187	254	397	310	189	207	253	156	198	214	450	243	415	120	107	174	220	60	81
jg1204	446	468	451	882	744	677	154	182	160	433	550	408	525	536	532	381	637	571	2074	649	1999	507	621	616	542	325	394
jg1205	14	9	8	78	72	64	23	32	23	21	40	17	24	24	24	28	31	15	76	33	96	32	51	51	19	32	20
jg1206	16	15	10	62	66	51	33	30	27	14	34	26	31	27	17	25	25	23	83	38	72	31	38	63	19	15	12
jg1212	311	305	280	610	568	535	114	161	192	238	386	432	309	442	336	364	428	420	479	327	439	406	402	316	446	439	326
jg1213	598	690	664	962	934	802	299	351	367	801	1009	608	846	852	852	648	867	668	853	506	744	817	740	475	696	808	756
jg1215	105	95	136	657	693	567	201	192	246	267	328	454	284	327	321	264	322	336	450	326	320	220	365	425	184	185	133
jg1216	9	15	0	27	27	17	25	41	11	162	205	70	275	482	516	155	342	90	217	558	499	866	1260	515	1446	1650	573
jg1217	5	5	0	8	6	1	3	1	2	8	19	0	18	33	85	19	36	66	50	59	51	168	353	88	661	624	358
jg1218	12	8	0	12	6	1	0	1	7	1	12	1	15	7	1	5	7	0	6	9	11	11	0	7	8	17	19
jg1219	65	50	45	72	62	55	63	65	72	193	217	133	173	502	1565	133	316	412	226	373	548	487	656	574	879	859	782
jg1221	4	15	9	12	22	13	10	14	4	24	12	29	33	166	329	59	160	70	151	229	250	253	426	303	504	345	409
jg1223	15	13	6	12	12	1	2	0	0	4	11	0	18	11	0	10	8	1	6	14	9	12	6	17	6	52	46
jg1224	1	5	3	2	4	6	4	5	0	5	2	4	2	3	1	5	6	1	5	2	2	4	1	0	1	5	1
jg1226	50	66	56	87	82	49	43	45	38	115	216	96	146	929	1982	273	895	393	645	1295	1336	1291	1963	1187	2792	2185	1840
jg1228	63	26	50	61	60	44	22	12	25	41	175	51	111	610	1981	256	716	393	473	1062	972	1228	1591	876	2261	1494	1263
jg1231	7	17	20	15	31	27	16	30	25	107	69	108	210	1216	2189	126	995	260	687	426	912	468	730	1504	1110	1798	2231
jg1233	2	2	2	2	3	0	8	1	7	8	7	3	7	3	9	8	10	5	5	5	13	30	48	14	75	74	28
jg1234	2	2	2	3	4	4	1	3	4	4	21	2	6	19	48	24	50	73	10	50	42	89	250	51	442	106	72
jg1235	1	1	0	3	1	0	0	0	0	0	2	1	1	7	6	2	12	27	6	1	7	48	66	16	132	55	20
jg1236	7	3	0	6	5	1	3	0	1	1	9	0	10	4	1	2	8	0	4	5	5	6	5	2	15	1	5
jg1237	8	6	5	6	8	12	2	1	7	6	23	16	14	22	54	18	62	20	10	58	33	73	105	37	177	147	59
jg1238	1088	1072	1089	1018	1096	835	373	432	433	846	1003	677	697	706	677	661	662	621	574	507	590	458	585	542	564	471	457
jg1239	8	14	11	10	15	11	14	11	18	32	16	32	18	16	38	23	17	25	15	15	12	21	35	12	10	16	16
jg1240	1	2	5	12	15	8	9	4	2	18	20	25	16	14	22	31	25	9	4	3	2	1	3	3	15	10	4
jg1241	11	15	16	5	3	3	11	4	3	1	11	6	1	3	2	4	4	3	0	0	1	1	1	0	3	2	1
jg1242	210	169	327	145	187	141	91	96	112	246	112	134	158	124	135	118	112	161	63	92	76	92	87	92	94	41	17
jg1243	0	1	7	6	3	17	3	1	6	10	27	13	20	65	151	43	172	434	196	323	283	586	1358	368	2586	1770	1208
jg1244	0	3	0	0	1	0	0	4	1	0	0	2	2	13	20	3	29	37	60	108	131	103	270	103	203	136	123
jg1245	0	0	0	3	2	4	1	0	4	0	10	0	9	9	7	51	8	14	77	70	153	114	81	36	108	152	67
jg1246	0	0	0	1	0	0	0	2	1	5	0	4	8	2	0	9	4	4	38	30	54	55	25	18	49	75	34
jg1247	0	0	1	1	0	0	0	0	1	1	4	10	1	0	0	2	1	0	0	2	0	0	2	1	1	3	7
jg1248	1038	999	1351	1692	1551	1275	489	534	613	823	1272	1333	1184	1114	1034	930	1162	1052	1241	1271	1197	1021	1253	971	1046	990	829
jg1249	2021	2372	2125	1100	1153	981	759	759	916	1513	1775	1639	1655	1501	1541	1701	1725	1331	928	736	1005	1009	923	593	1253	1092	1066
jg1250	1494	1637	1478	1087	1073	855	297	361	366	762	916	857	932	893	859	836	994	888	492	601	525	466	559	497	337	312	320
jg1253	6	1	10	9	3	1	0	0	1	4	6	10	9	6	5	8	5	4	2	2	1	2	3	2	2	5	2
jg1254	815	905	795	438	447	384	351	305	343	887	1227	800	1001	754	588	741	810	606	71	164	141	148	129	128	288	253	280
jg1255	0	0	0	1	0	0	3	0	0	0	0	0	0	0	0	0	0	0	0	1	0	1	1	0	1	5	0
jg1256	0	0	0	0	2	4	0	0	1	0	1	0	1	0	0	0	0	0	0	0	0	1	2	2	1	2	2
jg1257	3	2	0	1	1	3	0	2	3	0	0	7	0	2	1	0	1	0	0	4	2	1	3	1	1	3	0
jg1258	0	1	0	1	2	0	0	2	1	0	0	0	0	1	0	0	1	0	0	3	1	2	4	0	0	1	0
jg1259	2	5	2	2	0	3	0	4	3	0	4	2	0	0	2	2	2	1	0	2	3	1	3	1	2	3	3
jg1260	538	555	505	251	240	207	57	75	85	125	196	124	148	157	136	94	152	145	93	114	84	76	88	82	93	125	79
jg1261	14381	15282	15777	7935	8089	6654	2321	2473	2354	4308	6130	6927	6066	6064	6727	5284	7060	5866	3580	2704	3184	2920	3411	3296	3494	3231	3268
jg1262	949	1295	1059	371	350	288	106	127	167	299	432	287	323	261	231	246	270	215	243	240	270	237	315	291	260	246	227
jg1263	9	2	3	753	843	601	249	309	318	412	259	216	147	166	236	189	231	137	165	236	246	20	20	235	106	108	145
jg1264	620	669	632	448	407	328	207	236	272	410	730	641	558	646	623	594	803	630	620	589	588	634	777	701	560	651	418
jg1265	4440	5179	4897	4784	4894	3748	2384	2691	2672	4583	5826	5074	5053	4847	4868	4831	4957	4416	3344	3703	3331	3431	3891	3331	3916	3912	3294
jg1266	99	96	97	28	23	19	12	11	12	8	18	8	0	2	4	1	8	3	4	3	3	3	2	4	3	3	3
jg1267	27	22	28	482	495	384	131	177	199	226	235	216	211	207	192	231	235	149	197	271	233	281	283	289	274	477	323
jg1268	58	71	79	254	303	271	48	56	90	120	228	144	162	163	98	192	167	155	396	120	127	300	299	80	245	499	233
jg1269	29	27	31	34	40	29	24	40	83	81	94	39	190	101	55	85	91	95	53	29	47	13	14	17	9	16	3
jg1270	0	4	0	3	0	0	0	0	0	0	1	3	0	0	0	0	0	0	0	0	0	1	1	0	0	0	0
jg1271	5	5	2	3	2	2	3	0	0	0	1	0	0	0	0	2	0	0	0	2	0	0	2	0	0	5	0
jg1272	90	84	86	979	938	751	251	319	312	467	533	563	515	636	661	590	688	596	1147	829	887	661	905	1122	481	456	408
jg1273	107	194	122	118	137	111	47	83	74	119	140	128	93	87	94	46	100	76	53	66	31	59	66	69	59	46	38
jg1274	0	0	0	0	2	1	0	0	0	1	1	0	0	0	0	0	0	0	0	0	0	0	0	0	0	0	0
jg1275	617	702	593	1985	1977	1664	464	590	681	1067	1290	1174	980	1203	1224	982	1225	1031	1660	1340	1439	1051	1340	1551	636	634	642
jg1276	18	12	14	31	38	28	1	6	17	17	27	25	11	14	19	18	27	23	35	23	35	20	22	20	19	17	13
jg1277	0	0	0	0	0	2	3	1	0	0	0	2	2	15	87	5	10	0	52	96	122	57	101	159	220	89	143
jg1278	1	1	0	0	2	0	0	0	0	1	0	0	0	201	695	20	99	1	1289	368	2028	139	372	3771	2589	903	293
jg1279	0	0	1	0	0	0	0	0	0	0	0	0	1	322	910	117	512	4	728	2787	1280	747	2384	1649	3830	385	12
jg1280	0	0	1	0	0	0	0	3	0	1	0	2	0	191	1136	89	145	6	167	1066	728	419	730	449	963	0	0
jg1281	1	0	1	0	0	0	1	0	0	1	0	1	0	0	0	0	1	1	1	1	0	3	4	0	8	0	9
jg1282	1	9	3	3	1	4	0	0	1	1	0	2	2	1	2	5	1	1	0	0	2	0	0	2	0	2	2
jg1283	25	41	35	24	14	12	2	8	7	5	13	6	5	373	1734	64	237	18	274	818	400	351	532	546	771	113	508
jg1284	541	641	615	986	1014	891	343	373	386	633	783	901	556	641	693	554	732	713	952	658	738	638	672	667	582	542	479
jg1285	8	7	2	3	4	4	0	0	0	0	1	2	0	4	3	2	4	1	7	3	0	0	3	0	3	0	3
jg1286	439	403	602	469	551	456	185	222	222	505	739	584	539	725	623	647	837	733	820	720	753	994	876	579	1152	976	1168
jg1287	1325	1595	1668	807	904	725	344	400	435	1038	1384	888	1064	972	831	1147	1033	921	633	852	682	996	1051	513	1858	2114	1802
jg1288	2	1	3	2	5	7	0	1	3	2	2	80	3	5	6	4	8	2	1	0	5	2	0	0	0	3	0
jg1289	2735	3283	3055	3581	3954	2783	904	1084	1154	2518	3188	2304	2822	2527	2203	2093	2540	2062	3283	1696	2857	2006	1913	1701	1793	1759	1584
jg1290	4	1	2	16	15	16	0	4	0	6	6	8	6	4	5	10	4	3	10	2	7	4	11	0	1	8	6
jg1291	127	139	165	617	659	591	462	444	484	1080	1479	1324	1201	1036	828	987	991	905	159	356	153	234	267	229	339	301	331
jg1292	25505	31427	25375	29264	31675	26801	15168	16004	18994	33430	38976	32704	26142	26894	28915	26681	30064	22292	37002	28550	38409	21651	24685	33059	17322	14575	15013
jg1293	0	1	0	0	2	0	0	0	1	1	0	15	0	3	3	0	2	1	0	0	1	0	0	0	0	0	0
jg1294	4103	4718	4309	552	685	533	961	1004	1006	1960	2936	2167	2007	1610	1581	2065	2065	1408	97	237	114	442	257	157	550	461	415
jg1295	2577	2863	2757	2418	2398	2115	834	845	885	1884	2267	2467	2163	2093	1998	2247	2267	1974	1959	1824	1694	1753	2308	1856	2293	2084	1719
jg1296	3232	3533	3274	587	618	525	407	372	363	866	1158	942	1066	883	882	726	800	769	110	192	196	185	243	160	211	220	247
jg1297	1859	2020	1889	785	888	760	552	613	680	1069	1282	1001	1280	1084	1075	1010	986	799	437	538	529	357	398	500	440	423	399
jg1298	621	745	755	417	531	411	379	452	408	671	932	881	823	706	563	696	797	570	306	474	392	266	344	422	421	453	283
jg1299	193	321	240	1048	1014	927	457	424	512	750	744	880	860	789	892	1852	1674	1758	444	1497	936	1183	1460	1366	1083	952	736
jg1300	770	1107	971	413	553	492	449	392	547	984	894	1165	726	643	731	657	666	455	2575	642	1649	482	1108	852	455	588	518
jg1301	1004	1278	1294	608	683	561	328	313	355	744	811	704	750	621	618	661	693	413	870	420	758	448	503	506	490	539	445
jg1302	46	68	72	45	42	49	49	32	56	110	166	153	197	290	531	129	263	267	216	262	267	259	531	245	934	744	505
jg1304	120	98	120	611	575	458	170	225	209	330	373	342	360	380	372	272	386	288	473	384	368	264	324	395	154	184	143
jg1305	20	10	34	21	30	23	9	13	17	16	24	27	5	5	4	5	31	2	1	3	3	5	1	2	7	3	4
jg1306	4	0	2	1	0	1	2	0	3	1	7	17	2	0	0	1	0	0	0	0	0	1	0	0	0	1	1
jg1307	89	89	90	45	44	47	15	24	12	47	74	40	57	32	37	22	47	35	7	13	8	9	22	9	16	11	7
jg1308	3	20	18	10	6	16	3	1	4	4	6	5	7	17	2	9	7	8	20	9	16	8	8	13	18	19	10
jg1309	433	485	454	353	347	291	86	129	119	284	450	206	274	272	233	232	306	227	554	197	494	176	208	239	310	298	235
jg1310	247	257	199	135	160	146	35	78	53	154	144	95	130	129	106	57	93	71	135	59	149	84	71	49	97	106	112
jg1311	763	727	816	1170	1097	855	297	352	328	688	1142	683	794	828	744	770	865	804	1640	771	1735	806	986	1003	932	878	940
jg1314	105	125	136	937	888	671	276	368	334	370	566	640	915	808	594	728	819	583	400	448	318	319	378	367	342	227	198
jg1315	1485	1737	1641	1092	1110	839	424	519	579	791	1092	1354	1188	1155	1135	1316	1462	1174	1510	1275	1067	1343	1669	1282	1728	2051	1524
jg1316	866	1036	983	507	563	426	250	192	264	768	939	775	940	814	801	882	858	670	337	418	333	387	324	408	466	329	365
jg1317	703	851	834	559	578	460	326	318	397	874	1009	832	1149	1045	1032	1287	1212	1059	551	594	595	730	772	653	1086	1056	916
jg1318	20	16	17	957	1146	896	488	828	934	717	537	485	320	308	348	180	222	198	199	226	213	147	203	211	172	242	191
jg1319	92	118	133	319	436	272	123	142	147	256	318	219	216	264	370	294	301	278	347	343	353	279	399	341	763	950	784
jg1320	17	34	21	218	256	193	76	111	135	136	127	160	141	146	151	140	167	129	362	259	316	174	182	296	134	197	141
jg1321	2	4	4	30	40	39	10	12	12	20	21	22	28	17	24	16	31	13	67	43	53	25	26	42	29	21	37
jg1322	369	367	372	387	416	373	158	165	225	323	378	269	331	350	326	271	313	316	504	338	503	391	498	363	557	596	494
jg1323	8812	10398	9783	12434	13193	9768	3414	3476	4271	7996	11614	11008	7238	7964	7515	7166	8787	8676	38085	11049	28068	14536	13489	14138	9198	9383	9677
jg1324	15	17	19	21	29	24	10	7	6	15	23	60	54	65	45	50	87	95	106	94	93	171	275	113	453	424	497
jg1325	996	1565	1329	1152	981	839	519	558	496	664	1151	1221	1253	1399	1398	1523	1702	1247	1971	889	1186	1282	1441	931	1406	1356	1015
jg1326	70	91	90	922	934	850	275	302	332	509	442	512	480	487	527	436	456	461	898	782	744	523	631	841	320	333	236
jg1327	2066	3067	2765	2263	2163	1868	678	872	794	1501	2118	2085	2184	2198	2362	2571	2763	2212	3330	1505	2000	2084	2291	1768	2607	2208	1645
jg1328	28	31	44	119	114	88	58	51	42	44	63	82	88	102	103	79	66	63	112	124	91	76	96	160	58	70	48
jg1330	211	272	223	242	209	166	75	80	67	197	206	152	267	275	357	260	269	314	442	488	388	277	277	364	157	122	98
jg1331	3	5	3	9	7	3	1	4	7	0	8	5	2	9	14	5	10	9	21	27	10	14	15	5	12	13	29
jg1333	342	271	284	466	520	409	90	84	108	248	309	209	158	206	178	109	223	213	744	155	407	2720	1195	307	949	857	759
jg1334	420	476	460	477	538	420	176	210	190	439	678	447	716	677	804	636	795	757	1015	765	960	894	976	774	1195	975	1265
jg1335	1695	1718	1469	2372	2466	1962	984	1158	1218	1763	2203	2104	1924	1878	1928	2188	2322	1742	1926	1723	1670	1448	1535	1697	1749	1328	1281
jg1336	1	2	2	22	24	11	4	3	6	18	18	8	16	35	37	38	32	38	32	61	47	74	55	24	60	65	50
jg1338	0	0	1	0	0	0	0	0	0	0	0	0	0	0	0	0	0	0	0	0	2	0	0	0	0	0	0
jg1339	0	0	0	0	0	0	0	0	0	0	0	0	0	0	1	0	0	0	1	0	0	0	0	0	0	0	0
jg1340	65	56	85	499	565	387	174	158	150	510	863	947	1053	916	891	1252	1284	1197	587	953	725	755	965	950	1279	988	827
jg1341	65	63	92	184	179	149	56	58	68	180	159	149	141	123	127	157	128	117	119	148	129	123	153	124	109	127	96
jg1342	3003	3828	3501	1631	1652	1660	1384	1332	1555	3172	3785	3526	2944	2697	2571	3707	3638	2525	8001	3147	10060	2550	5380	5958	2001	1727	1486
jg1343	1664	1960	1976	293	291	323	388	425	472	923	1317	1033	874	804	746	925	1002	670	274	270	291	333	323	259	449	409	349
jg1344	2130	2289	2233	2734	2744	2406	941	995	1005	1658	2589	3121	2304	2547	2402	2733	3417	2845	4008	2720	3648	3133	3642	2318	3779	3682	3004
jg1345	59	72	60	15	25	19	7	7	6	15	29	27	15	9	6	12	17	15	2	11	12	9	21	6	25	23	13
jg1346	1155	1749	1524	1491	1252	1082	394	242	378	1968	1240	3942	1244	1725	1780	3868	5476	3029	1008	1736	1682	2183	3787	3495	3896	3498	3100
jg1349	5	20	17	290	235	377	30	14	10	99	160	577	34	58	141	128	328	158	51	151	86	67	113	29	59	90	47
jg1350	398	587	701	615	644	520	193	178	191	366	560	482	746	751	610	594	764	717	461	450	366	422	480	333	636	403	463
jg1351	1865	2309	2270	712	755	594	491	566	648	1325	1530	1083	1188	1041	1007	1288	1098	860	665	711	886	575	678	656	833	778	763
jg1352	2	6	5	12	4	3	1	0	0	2	1	3	1	0	4	0	2	2	2	0	4	7	7	0	5	1	4
jg1353	42	32	53	78	83	70	23	11	31	66	59	84	108	85	68	99	122	85	22	57	15	69	39	80	47	61	48
jg1354	284	344	416	693	596	464	198	198	168	534	509	570	705	624	607	667	835	655	287	419	232	489	308	303	369	336	393
jg1355	857	821	938	2141	2018	1828	1827	2271	2350	3519	4133	3416	2394	2041	1840	1680	1924	1335	969	992	939	836	1241	905	892	910	639
jg1356	1862	2449	1960	1117	1183	1015	1441	1460	1813	2983	3208	2667	2774	2158	1750	2783	2849	1924	1312	1567	2281	1461	1609	1475	1615	2071	1372
jg1357	19538	21224	20246	19585	22664	20442	10122	12059	12451	26288	26176	21743	16536	19052	18917	14588	21156	19287	25077	19255	23578	18647	21623	21176	20136	18888	16932
jg1358	189	189	199	1112	1123	773	280	345	370	362	511	500	328	385	404	346	397	281	638	592	594	480	658	711	381	324	301
jg1359	613	748	778	634	698	550	209	221	291	491	714	455	465	466	448	471	478	418	945	407	829	407	630	348	440	402	461
jg1360	231	243	247	534	565	496	128	149	158	264	289	244	208	201	238	172	202	146	237	196	197	202	252	218	186	142	97
jg1361	255	307	323	378	366	355	100	122	118	190	286	253	242	237	226	212	240	217	233	211	261	197	215	224	230	229	187
jg1362	2400	2965	2919	1227	1322	1008	711	824	908	1581	2113	1770	1382	1343	1430	1408	1596	1244	817	801	732	691	795	703	570	650	675
jg1363	0	0	0	0	2	3	0	3	3	2	1	0	1	0	1	0	0	0	0	1	6	5	4	0	0	0	0
jg1366	557	601	619	2157	2312	1882	418	544	629	752	1051	1206	786	800	757	688	910	739	1702	783	1013	2192	1671	1293	1357	1323	1478
jg1367	201	279	233	194	216	155	111	126	163	169	326	201	194	202	133	190	189	140	139	90	119	88	83	57	122	116	108
jg1368	3789	4504	4184	2279	2271	1969	751	791	804	1888	2654	2749	2102	2377	2448	1974	2765	2448	1534	1326	1303	1180	1213	1107	1459	1406	1052
jg1374	77	107	100	473	499	350	105	120	114	182	216	163	108	139	203	129	174	129	254	221	212	198	200	245	151	164	140
jg1375	2931	4046	3411	1670	1807	1508	2026	1837	2089	4376	5033	5970	5008	4639	4090	6247	5835	4642	6806	2708	12007	2809	3323	3665	2481	2248	1884
jg1376	2536	2251	2041	5867	4703	5104	1974	2342	2389	2969	3318	3751	3691	4176	4210	4225	4830	4565	18397	15933	14499	13147	22159	32669	5603	9880	8187
jg1379	933	944	812	2153	1792	1864	641	787	910	1190	1236	1336	1321	1527	1583	1462	1707	1818	6824	6193	5523	5103	9004	12384	2261	3613	3182
jg1380	2268	1927	1521	1206	1141	926	442	397	506	1150	1487	1283	3019	2660	2486	5671	6392	3831	3747	4101	2936	3996	3997	2650	5959	868	4255
jg1381	50	65	48	80	84	82	20	16	22	45	82	75	51	70	44	62	64	67	125	75	113	76	101	89	65	83	61
jg1382	641	664	635	1028	1121	848	268	305	361	677	1017	1081	659	751	739	715	904	872	1836	858	1253	969	1072	1012	888	878	972
jg1383	1074	1088	1209	13031	13269	9574	2819	3576	3845	4415	4943	5421	5143	5873	5836	5057	5834	5464	9655	8368	9113	5503	6845	8757	3699	3226	3274
jg1387	4	4	8	153	112	81	32	75	83	51	56	53	77	82	76	81	87	90	177	172	175	131	125	196	55	62	34
jg1388	806	985	784	6738	6831	5376	2281	2685	2601	2870	3850	3780	1856	1653	1941	1071	1709	1419	438	407	315	427	603	419	577	393	341
jg1389	515	611	505	157	191	149	64	80	85	235	288	230	292	315	270	355	351	268	126	194	131	151	169	198	246	209	236
jg1390	1552	1682	1662	1174	1157	853	506	624	578	760	1204	1251	1037	1057	914	762	995	953	631	689	598	538	569	579	514	523	498
jg1391	525	719	592	1924	1915	1700	554	636	659	1073	1360	1463	1022	1265	1178	1018	1310	1110	1113	1088	1089	842	1073	1126	763	732	556
jg1392	62	43	49	762	787	673	507	517	519	801	910	1333	1083	1503	1004	2084	1298	1396	957	1359	886	2531	2537	699	1589	2182	1368
jg1393	0	0	0	0	0	0	0	0	0	0	0	0	0	0	0	0	0	0	0	0	0	0	0	0	0	0	1
jg1394	384	398	331	213	238	137	119	104	125	217	323	245	227	195	186	192	224	157	165	158	209	106	100	139	110	120	84
jg1397	601	630	600	2795	2807	2064	614	759	888	984	1371	931	913	1031	1003	693	942	816	1058	913	930	557	618	859	301	280	258
jg1398	215	208	237	166	199	133	87	117	142	178	265	181	262	203	181	284	237	205	129	181	135	189	192	140	148	166	120
jg1399	120	167	135	56	80	51	12	19	23	65	65	52	97	73	44	82	86	68	45	112	43	104	122	92	153	100	109
jg1400	1	0	0	0	0	0	0	0	0	0	3	0	0	1	0	2	2	0	1	1	0	1	0	0	1	0	0
jg1401	53	80	66	543	602	489	1195	1110	1356	4928	4763	5132	3531	3013	2788	4192	4077	2118	727	2026	631	3373	3543	2437	3674	11802	6097
jg1402	172	193	187	254	265	227	93	109	104	238	270	313	245	291	266	232	308	263	317	299	242	310	331	255	334	376	291
jg1403	489	567	528	584	607	516	256	283	338	618	763	738	641	619	559	638	719	624	619	617	514	715	820	500	644	745	550
jg1406	60	80	39	173	231	200	53	94	66	253	221	161	287	262	282	173	246	185	316	213	250	232	301	281	205	292	352
jg1407	34	33	354	509	395	336	111	116	130	119	311	197	94	144	87	253	279	213	146	211	111	152	229	124	176	76	52
jg1408	27	14	216	284	195	211	88	41	96	40	166	127	38	62	51	138	171	163	76	141	55	111	116	65	118	13	24
jg1409	3180	4355	3690	1489	1515	1299	1088	1120	1345	2754	3161	2701	2792	2386	2718	2678	2878	2240	1274	1568	1405	1569	1684	1490	1849	2041	1534
jg1410	856	960	925	664	670	583	235	291	322	445	710	561	483	509	436	474	554	481	930	464	865	568	727	406	706	735	745
jg1411	54	41	43	78	77	57	83	81	115	219	194	231	212	324	577	331	473	385	223	362	382	433	563	434	644	598	504
jg1412	1146	1396	1277	1556	1486	1320	574	663	732	1123	1479	1218	1062	1154	1068	1021	1146	972	1286	836	860	687	873	816	621	632	519
jg1413	268	273	315	336	362	241	83	145	102	197	220	202	186	205	217	130	194	170	158	124	171	119	146	140	82	111	88
jg1414	1189	1488	1303	683	723	629	347	433	448	792	912	715	725	661	719	696	693	547	413	498	430	498	520	439	603	504	535
jg1415	303	285	345	573	624	478	162	181	201	345	364	214	227	272	252	278	238	232	437	390	449	207	326	380	175	232	195
jg1416	22	29	44	261	258	160	79	130	169	205	198	220	122	173	164	120	171	183	177	124	143	84	99	91	48	66	34
jg1417	2080	2387	2291	1571	1785	1397	873	922	1118	1877	2184	2046	2030	1843	1826	2071	2053	1829	1823	1607	2054	1456	1916	1358	1621	1536	1361
jg1418	830	961	824	781	828	565	317	318	342	725	1142	950	876	871	783	786	897	778	307	353	247	375	396	298	351	424	384
jg1419	0	0	4	0	0	1	0	0	0	0	0	0	0	0	0	0	0	0	0	0	0	0	0	0	0	0	0
jg1420	0	0	0	0	0	0	1	0	0	1	0	0	1	4	3	2	5	0	9	10	7	11	20	18	33	31	38
jg1421	6	8	1	28	28	17	22	16	28	31	43	41	53	67	75	131	146	177	247	257	257	422	497	337	879	864	1123
jg1422	31	47	37	176	169	157	65	76	80	106	119	141	101	113	110	130	149	131	115	109	117	101	126	159	87	49	70
jg1423	0	0	0	0	0	0	0	0	0	0	0	0	0	0	0	0	0	0	0	0	0	0	0	0	0	0	0
jg1424	13	19	12	5	2	0	1	0	0	0	3	10	2	8	3	1	6	8	0	0	1	2	4	2	3	3	2
jg1425	2392	2750	2640	798	886	775	284	334	407	1079	1800	1247	1676	1584	1378	1451	1832	1495	1418	1164	1146	1249	1393	1489	1574	1508	1361
jg1426	377	395	328	312	341	272	75	78	73	145	189	273	207	233	313	207	286	213	501	475	427	278	300	502	208	397	379
jg1427	276	265	251	786	682	589	117	160	192	178	268	278	214	230	252	185	308	249	1092	657	956	272	427	801	263	162	301
jg1428	8	14	9	82	68	64	26	38	12	33	36	25	23	28	21	28	24	12	27	20	25	22	15	28	14	3	9
jg1430	95	71	84	237	264	205	65	59	63	189	199	116	184	150	146	107	170	110	91	67	76	109	104	85	65	63	42
jg1431	134	103	98	129	170	118	56	70	60	176	230	130	207	194	136	171	166	132	95	70	94	58	62	60	53	64	31
jg1433	7	2	5	9	3	7	1	2	1	6	24	17	84	117	44	313	213	174	93	180	110	748	586	115	1144	769	1304
jg1434	11	19	11	78	75	77	23	35	24	47	27	37	32	36	33	31	34	46	106	39	63	36	45	68	11	21	17
jg1435	348	365	357	277	277	242	166	115	191	324	400	294	285	263	236	286	306	226	237	208	315	207	184	149	273	250	226
jg1436	1935	2094	1971	1856	1956	1571	489	548	557	1326	2154	1441	879	1179	1162	826	1259	1163	1121	897	889	1405	1378	948	1156	1424	1080
jg1437	2067	2162	2014	3044	2959	2422	717	758	825	1526	2785	1899	2041	1951	1953	1542	2182	2281	1896	1624	1384	2401	2374	950	2706	2384	2374
jg1438	1	6	2	5	11	9	0	7	7	121	63	38	63	107	113	68	94	65	4	48	14	269	225	244	174	217	189
jg1439	1060	1422	1128	594	603	525	339	359	454	767	743	678	744	742	678	742	773	584	550	471	505	387	555	508	519	507	458
jg1440	560	712	612	459	490	347	260	267	357	600	760	492	573	486	498	570	556	395	496	348	468	319	385	355	402	399	317
jg1441	350	450	365	258	264	214	136	160	179	339	420	313	285	306	282	296	330	278	295	209	365	186	241	232	276	201	182
jg1442	5102	5537	5626	10303	10327	7703	1284	1752	1543	3642	4761	3038	3582	3632	3953	2938	4043	4396	12706	6133	12158	5101	6962	7171	5421	4723	5327
jg1443	1849	2142	1964	1285	1294	995	619	710	776	1162	1489	1109	1073	1016	972	842	1021	998	1345	989	1320	944	1021	1093	1060	1023	1098
jg1444	424	388	442	2166	2153	1832	1076	1226	1382	1939	2108	1620	1698	1684	1924	2990	2799	1829	5498	4900	6316	4960	5502	6341	3286	3464	2975
jg1445	901	1282	895	2176	2057	1881	1385	1400	1699	3306	2938	2986	1705	1998	2340	2460	1876	1548	2003	1998	2048	2338	2517	1950	2095	2315	1393
jg1446	576	634	686	418	377	358	202	205	260	315	402	362	347	343	261	365	353	224	1117	506	740	630	1060	694	1349	1403	1100
jg1447	9173	10564	8919	2701	3046	2545	1856	2022	2224	4388	5961	5020	4864	5016	5100	4605	5995	4698	2703	2744	2842	3108	3316	3167	4758	4584	3877
jg1448	17	8	12	5	7	5	7	1	8	6	8	26	16	2	12	27	12	18	92	100	141	185	138	66	330	316	254
jg1449	3	13	11	120	125	105	8	17	9	105	88	57	104	164	130	94	77	104	37	60	69	101	96	58	93	147	115
jg1450	48	45	44	1209	1304	1204	182	192	206	1955	1870	1483	2830	6638	6501	5150	3486	3724	1362	1886	1289	2743	3192	1556	2539	2567	1660
jg1451	5236	5784	6148	2302	2586	2025	749	806	876	1596	2310	1679	2092	2156	3092	2081	2659	2118	1297	2332	1719	2520	1946	2353	3463	3701	3302
jg1452	9994	11499	11224	5924	5656	5107	3361	3722	3967	5336	7754	17359	7406	7700	6790	7222	8462	6543	8912	7165	9582	7105	7703	7614	6605	6341	6397
jg1453	145	177	155	186	186	139	45	64	75	115	125	79	116	108	83	95	83	102	106	86	111	64	71	82	60	52	61
jg1454	401	326	427	2626	2457	1817	476	576	574	1007	1715	1236	1612	1911	1580	2036	2446	2444	5117	3376	3934	3882	4086	3893	3052	2750	3083
jg1455	3	4	3	28	21	25	9	9	17	35	19	23	397	469	462	732	625	446	140	288	122	1330	810	72	1881	1713	1868
jg1456	1411	1784	1749	1587	1531	1355	781	958	994	1587	1955	2128	1835	1864	1729	1758	1862	1534	2760	1643	2708	1268	1950	1785	1227	999	1039
jg1457	1438	1661	1587	2253	2237	1794	675	1014	834	1264	1848	1435	1337	1542	1527	1236	1495	1364	1285	1059	1140	811	1057	912	787	698	648
jg1458	1980	2309	2217	1582	1482	1313	547	619	826	1038	1591	1453	1160	1383	1477	1254	1643	1342	981	1052	878	1148	1282	979	1056	1095	1061
jg1459	60	101	116	68	53	49	11	28	19	38	19	70	45	38	59	30	63	35	14	38	16	25	33	36	20	24	14
jg1460	13	23	39	26	11	11	7	4	8	4	4	41	3	7	17	0	3	1	2	5	3	0	1	5	2	3	0
jg1461	13	17	29	151	159	139	20	29	40	36	42	50	29	34	24	32	25	30	32	32	21	22	37	25	8	6	10
jg1462	1012	1111	1083	1579	1632	1274	371	431	408	866	1251	823	900	931	772	752	954	796	895	771	726	642	716	713	705	661	609
jg1463	21743	24655	23143	15177	15674	12088	4486	4749	4790	10035	15286	15974	11537	10204	6092	8146	9599	8805	893	2079	932	3400	3127	1714	4514	2754	3243
jg1464	60	82	73	39	34	31	4	2	2	26	31	56	34	29	16	22	32	24	3	5	2	18	11	5	12	4	23
jg1465	23475	27610	27547	19572	18554	15193	4869	4374	5060	13046	18383	21781	11213	9829	6153	10898	11551	10488	966	2372	977	4560	4389	1700	5357	2874	3110
jg1466	594	626	714	1262	1167	828	291	294	274	564	804	1253	725	882	780	595	1001	875	1972	1084	1272	730	793	998	773	800	945
jg1467	0	0	0	8	7	2	2	3	0	7	11	10	20	20	22	73	97	45	390	539	496	97	281	725	745	315	716
jg1469	467	536	405	246	227	180	75	91	71	162	160	142	186	147	136	146	194	127	188	120	147	173	155	105	181	194	197
jg1470	227	317	246	272	276	201	124	111	117	198	201	259	256	285	236	251	305	243	279	201	176	225	288	224	307	281	243
jg1471	330	362	329	433	407	367	93	119	147	174	240	277	224	320	246	234	306	219	468	190	291	202	310	207	265	202	309
jg1472	358	395	398	969	861	656	295	396	321	353	628	613	647	611	592	425	588	573	668	651	622	552	639	616	382	377	455
jg1474	5	2	5	18	17	14	9	3	5	4	19	18	22	18	17	9	21	28	15	14	12	6	10	13	17	10	21
jg1475	62392	71944	64161	81693	87230	75235	35692	41837	42657	101799	104464	82595	69042	71462	75425	66758	81712	71465	85380	71294	83600	71990	80000	73818	64270	56265	53585
jg1476	34	38	25	77	76	64	33	31	20	64	64	110	65	81	95	57	96	61	212	160	152	78	134	146	70	107	85
jg1477	189	241	188	324	355	288	92	102	126	205	309	238	213	174	156	186	250	209	266	134	194	130	115	92	107	72	118
jg1478	518	655	594	170	216	145	210	215	204	378	485	401	412	362	323	419	429	288	156	194	182	149	182	165	153	192	151
jg1479	1586	1708	1589	4795	4491	4259	1496	1713	1671	4155	5110	5205	5500	5892	6622	5570	7522	6517	19047	10751	15437	12358	15874	12433	7377	5426	5655
jg1480	123	213	205	46	49	52	12	20	13	28	14	29	95	112	219	389	456	152	30	12	4	19	37	27	507	167	155
jg1481	0	3	3	2	1	1	0	0	0	0	1	0	0	3	3	2	1	2	0	2	0	1	0	3	1	2	2
jg1482	88	133	126	41	36	29	21	20	21	34	74	77	63	51	58	69	66	48	17	12	13	15	11	10	29	22	28
jg1484	1759	1911	1905	924	812	662	278	284	285	592	1126	1245	1154	973	1028	1075	1522	1145	763	539	593	640	546	556	1002	646	864
jg1485	716	730	773	1534	1576	1225	320	314	373	745	1204	1036	750	1086	791	1126	1322	1198	3709	1358	3921	1867	2427	1339	1847	2741	2554
jg1486	265	337	287	332	333	281	119	140	170	342	581	414	542	596	456	459	629	480	448	406	316	457	469	287	519	546	450
jg1487	25	24	31	34	32	29	17	20	14	33	40	45	51	61	38	33	44	42	58	38	36	32	51	25	40	57	29
jg1488	2	9	12	15	12	12	10	5	3	17	20	13	25	28	22	40	58	56	33	44	43	82	55	46	144	98	131
jg1489	3772	4093	3778	518	516	437	232	219	227	669	1819	968	1167	840	758	1027	1204	886	102	129	97	266	170	76	797	440	347
jg1490	1770	1519	2327	1515	2031	1643	1101	1504	1314	3675	2336	2660	2730	2884	3153	2210	1995	1949	7910	3470	5080	2239	2895	6957	2757	3768	7145
jg1492	2	1	2	2	1	4	0	0	4	0	5	2	0	0	0	0	0	3	0	2	0	1	1	1	1	1	2
jg1494	4	10	11	33	38	18	13	16	18	16	23	18	21	24	20	17	22	16	31	28	21	10	11	9	8	8	3
jg1495	35	30	24	139	146	100	63	59	68	58	108	107	69	77	57	62	59	54	85	79	53	56	48	70	39	43	25
jg1496	0	0	2	2	4	1	0	0	0	3	3	2	4	5	5	4	1	3	9	6	2	2	7	2	2	5	2
jg1497	44	47	76	912	871	628	251	357	325	394	532	484	460	544	470	448	581	551	1178	817	762	459	628	821	297	297	274
jg1499	16	15	14	192	171	133	64	112	113	77	149	142	67	99	89	54	65	70	122	85	90	56	58	97	32	49	27
jg1500	6	8	15	19	19	9	13	12	3	5	9	13	17	17	13	10	17	14	29	19	12	29	29	33	28	11	22
jg1501	3	7	3	12	19	15	5	1	1	8	13	26	15	11	5	13	12	14	45	21	11	23	9	35	35	31	13
jg1502	262	287	307	744	811	621	375	378	462	668	626	1012	692	640	720	847	768	783	860	853	774	968	1189	1082	1144	946	1046
jg1503	1569	1763	1716	1584	1528	1419	1126	945	1640	1659	1614	1991	1776	1342	1381	3132	2074	1123	5350	2371	5724	2600	4149	3153	1451	1322	1307
jg1504	572	703	597	675	626	514	269	289	301	578	823	745	842	930	757	978	1033	841	1214	712	1253	744	911	973	1108	912	870
jg1505	1	0	2	15	10	12	3	5	0	5	4	4	3	0	2	1	7	2	12	13	17	3	15	17	2	3	4
jg1506	93	58	130	101	101	88	16	22	18	21	106	37	58	59	68	76	90	96	97	60	73	110	101	87	245	195	197
jg1508	159	138	185	256	286	225	78	103	95	133	143	174	177	167	212	158	147	145	194	165	137	129	141	175	132	137	169
jg1509	3348	3927	3488	3329	3263	2930	1366	1591	1967	3116	3308	3021	2455	2337	2762	3185	3126	2734	3865	2747	3613	2451	2762	2948	2013	1921	1776
jg1510	7	2	5	29	52	25	37	74	47	253	200	135	329	238	239	262	188	172	363	247	372	233	368	397	590	772	449
jg1511	34	53	57	446	444	388	135	150	225	459	499	622	530	555	960	1366	1401	1222	2741	2939	2382	2244	3083	3620	3934	5126	5089
jg1512	0	0	0	3	7	4	9	10	4	12	10	4	17	28	27	58	53	40	224	167	195	187	236	233	226	257	205
jg1513	42	20	37	32	53	38	12	31	8	32	46	27	99	140	225	118	193	133	268	368	324	273	386	354	597	449	447
jg1514	527	660	592	414	398	307	80	107	98	213	382	327	277	623	1187	443	780	643	1267	704	1088	1037	968	646	1382	1290	1367
jg1515	215	224	239	277	274	251	122	109	151	377	388	346	399	393	431	411	592	446	426	697	444	481	640	710	621	1020	797
jg1516	481	550	581	735	865	696	194	246	218	603	789	748	693	907	757	600	972	959	2408	810	1737	1039	1429	1015	1220	1182	1100
jg1517	2495	2686	2556	2411	2596	2282	1097	1107	1562	2747	3166	2507	2442	2312	2431	2350	2854	2136	1851	1700	2142	1774	1815	1812	2109	2251	1944
jg1518	675	847	780	784	852	710	199	284	292	419	703	630	357	581	449	262	570	360	790	372	706	471	615	708	447	364	436
jg1519	1	2	0	2	2	0	1	0	0	3	0	8	3	2	2	5	3	1	2	3	0	0	10	2	1	2	1
jg1520	327	406	333	177	206	153	134	144	172	168	215	217	225	161	232	221	188	152	148	175	178	123	208	177	130	173	160
jg1521	3711	4407	4050	2099	2170	1812	1075	1171	1344	1947	2550	2308	1954	1795	1706	1896	2036	1744	1551	1939	1850	1417	1876	1839	1722	1730	1319
jg1522	1175	1638	1397	782	848	761	640	699	870	1554	1374	1579	1438	1303	1296	1491	1372	1010	1073	973	1271	816	1500	1282	892	1017	819
jg1523	10810	13556	11794	3770	3986	3331	3665	3587	4308	6978	8277	7711	6378	5526	5933	6682	6266	4876	4174	3749	4145	3063	3665	3609	2861	2794	2448
jg1524	561	653	745	401	378	338	167	172	204	327	319	304	246	264	181	199	195	221	39	27	31	2	1	8	1	3	3
jg1525	4	1	0	0	1	0	2	0	0	1	1	13	0	1	1	1	2	0	1	0	0	0	1	53	69	189	97
jg1526	0	0	0	0	0	0	0	0	0	2	0	0	4	0	0	0	0	5	1	2	0	5	2	29	207	529	356
jg1527	1	4	3	28	29	38	0	3	2	6	3	0	0	2	0	1	0	0	1	0	1	1	4	7	5	3	5
jg1528	4	0	3	10	17	9	7	1	0	1	0	1	0	0	0	1	0	0	8	5	2	5	6	15	8	23	11
jg1529	0	0	0	3	4	4	0	1	0	0	1	0	0	0	0	0	0	0	1	0	1	0	1	1	1	0	6
jg1530	0	1	0	50	42	41	34	24	46	43	39	42	16	39	73	12	32	8	32	55	34	12	43	140	52	4	4
jg1531	19	41	44	35	41	30	4	17	26	10	38	13	5	1099	3964	155	709	1	786	2398	3002	672	2800	5697	2556	444	550
jg1532	11	3	5	3	5	8	3	2	2	11	3	10	2	203	911	31	206	5	168	701	558	200	780	1026	750	257	358
jg1533	140	212	170	620	627	465	165	219	213	349	472	412	323	262	349	285	353	285	378	337	349	350	333	400	406	405	349
jg1534	1436	1839	1711	849	984	869	593	612	753	1300	1264	1025	939	872	825	993	997	625	609	598	730	472	671	575	693	577	568
jg1535	595	605	663	317	340	308	158	163	137	303	229	425	308	390	258	351	485	287	331	328	224	416	499	245	393	566	443
jg1536	373	352	352	252	280	211	120	164	120	258	335	208	255	239	225	211	250	207	141	164	127	222	217	157	299	226	350
jg1537	14	13	9	9	12	7	5	2	8	12	16	22	18	18	10	9	43	32	32	27	20	55	59	102	276	141	225
jg1538	1	1	6	14	4	7	72	120	161	281	512	302	147	689	1518	286	1107	155	1177	2276	1347	1298	3756	4238	2226	2319	1985
jg1539	33	41	47	137	151	103	39	26	66	61	114	115	129	152	134	120	168	125	204	220	154	106	219	224	110	148	120
jg1541	0	0	0	0	0	0	0	0	0	0	0	0	0	0	0	0	0	0	0	0	0	0	0	0	0	0	0
jg1542	52332	44225	40743	83920	78693	71248	28389	29831	30012	77169	80355	73118	83312	79463	92623	88093	106399	88240	13260	15672	12220	35728	26172	6633	17455	5691	11751
jg1543	40	86	32	13	18	21	14	5	8	20	16	22	29	88	183	104	261	511	51	119	124	302	182	48	878	760	646
jg1544	3	10	6	1	13	13	3	4	3	25	39	18	133	176	150	278	299	410	1525	620	1484	4151	3015	1017	8812	7726	6458
jg1545	0	0	0	0	2	0	0	0	0	1	0	0	1	0	0	0	0	0	13	0	16	0	0	15	3	2	6
jg1546	389	691	475	31	17	14	2	8	10	8	24	14	21	763	1267	160	982	89	688	1273	893	975	1338	1136	1475	787	1430
jg1547	27	44	33	2	3	6	4	0	0	0	0	2	2	55	136	33	56	18	128	201	122	143	220	164	268	136	195
jg1548	8	11	4	4	9	2	1	2	1	0	9	2	2	56	142	76	83	15	85	202	121	127	166	236	289	242	299
jg1549	181	211	212	47	51	38	24	9	15	44	114	51	71	219	156	114	104	91	193	81	140	234	199	102	142	105	108
jg1550	332	364	279	357	305	268	147	199	161	212	366	365	378	384	373	507	553	426	611	383	350	439	314	281	533	220	294
jg1551	405	569	570	618	649	545	137	185	218	347	516	436	479	525	524	481	587	527	649	487	513	660	724	672	614	927	701
jg1552	833	849	862	4449	4860	3785	1064	1318	1221	2309	2123	2281	1890	1871	2261	1741	1973	1817	1932	1757	1593	1239	1704	1818	804	722	700
jg1553	144	191	206	476	503	381	165	214	194	278	500	497	704	749	750	588	732	671	664	508	522	417	474	471	425	430	341
jg1554	524	541	566	788	786	695	415	432	460	965	1727	1707	2036	1820	1462	1644	2181	1748	437	641	401	845	734	494	1109	732	1177
jg1555	14	9	19	33	31	23	10	13	11	20	51	27	22	31	33	35	46	56	21	23	15	27	43	37	33	20	22
jg1556	179	282	199	911	883	871	1178	1529	2482	8542	5027	3980	8597	4584	5778	7975	8421	9496	15861	13247	11461	8417	14211	17966	20137	26796	25467
jg1557	456	593	490	496	476	423	108	160	181	322	401	303	334	287	300	329	334	278	360	322	379	246	316	416	364	510	405
jg1558	1267	1746	1779	3491	3507	2832	646	947	819	1111	1743	1280	819	984	1160	540	1011	1515	2855	1496	3123	1308	1865	1613	3027	1315	2254
jg1564	1306	1271	1248	3834	3865	2826	905	1120	1027	1989	2492	2051	2420	2339	2444	2218	2412	2279	2176	2416	2039	2074	2032	2220	1721	1162	1080
jg1565	718	728	720	2085	2297	1679	582	582	637	1131	1314	1386	879	963	849	801	993	982	606	1017	1207	601	694	763	569	553	528
jg1566	33	20	38	69	93	47	23	22	37	40	33	42	47	38	30	40	28	24	12	32	55	25	29	36	27	46	34
jg1567	6	3	1	10	9	5	2	0	0	23	16	23	87	81	59	109	88	85	71	75	53	96	93	61	126	133	168
jg1568	52	56	80	558	663	427	214	237	261	347	389	253	210	208	263	174	164	157	382	251	337	163	190	232	73	78	92
jg1569	22	6	6	116	113	108	2	15	11	12	17	32	13	9	6	22	15	31	85	25	50	90	63	57	83	79	67
jg1570	1737	2126	1905	421	453	396	144	111	160	246	412	291	255	154	167	132	191	144	18	25	20	21	24	7	29	38	8
jg1571	0	2	1	88	81	52	2	0	2	3	2	5	2	6	10	12	7	5	39	26	35	20	14	4	24	109	25
jg1572	2	1	0	288	231	254	7	19	12	35	28	24	28	40	20	29	42	79	107	74	47	243	131	72	301	107	329
jg1573	0	0	0	5	1	12	3	0	0	6	61	8	188	697	80	43	164	50	1196	177	323	2038	904	625	480	143	780
jg1574	45	55	55	206	171	148	55	81	100	199	272	177	311	262	425	273	503	518	619	725	752	746	1247	720	1330	1113	943
jg1575	14	19	22	55	49	64	28	29	63	53	126	64	132	108	186	111	191	225	246	275	327	334	580	350	520	470	451
jg1576	0	0	2	0	0	1	0	0	0	0	2	2	1	1	3	2	2	3	5	3	2	0	0	4	1	12	1
jg1577	0	0	0	0	0	0	0	1	0	0	2	0	0	0	2	0	3	0	4	2	5	1	3	2	12	8	10
jg1578	26	28	27	22	21	28	19	21	11	25	44	114	79	153	118	90	120	139	209	111	230	144	116	221	139	152	336
jg1579	58	49	78	278	279	231	110	129	136	247	326	343	242	284	384	271	390	290	474	305	348	337	476	390	417	622	578
jg1581	38	39	17	67	96	85	11	12	7	30	47	28	55	340	514	78	218	81	575	167	330	175	197	325	208	373	333
jg1580	118	133	86	310	298	236	50	34	28	63	237	154	90	605	1074	303	608	308	1235	683	835	817	1078	614	1063	756	788
jg1582	1	6	6	21	18	17	18	9	14	5	38	23	19	127	422	77	259	114	103	314	146	340	376	147	426	407	254
jg1583	3	2	7	36	42	36	3	17	15	26	24	28	42	38	26	55	56	51	34	50	80	70	144	136	186	217	198
jg1584	378	416	471	285	389	273	99	175	147	251	307	215	146	221	281	176	186	188	213	219	209	170	303	296	161	203	165
jg1585	616	672	544	824	834	711	232	336	352	712	980	582	704	776	730	775	786	652	771	656	623	772	858	490	925	1027	1048
jg1586	1150	1259	1300	1349	1366	1101	483	656	645	780	1097	1270	1100	1077	1043	976	1164	1017	1133	1026	919	780	1054	925	867	1017	740
jg1587	1667	1861	1758	372	409	326	165	285	262	375	571	526	470	415	508	370	422	405	90	164	88	119	133	104	95	83	86
jg1588	5	6	8	9	20	3	3	3	3	13	19	59	12	27	43	33	36	67	86	83	154	117	120	74	231	201	248
jg1589	34	42	43	45	44	45	26	33	23	56	37	47	80	102	84	64	126	135	178	166	168	177	168	154	317	305	373
jg1590	3	1	0	0	0	1	0	0	0	0	1	0	2	0	0	1	0	7	2	1	1	2	1	0	6	16	12
jg1591	0	2	2	0	1	3	0	0	0	1	0	0	1	0	1	0	0	0	0	6	5	2	1	0	4	11	16
jg1592	20	16	29	10	12	7	4	4	10	13	10	10	33	23	39	14	21	50	41	42	118	43	53	32	90	96	93
jg1593	0	3	0	5	1	4	0	0	0	1	0	4	1	6	2	7	3	8	6	15	10	30	14	8	23	14	22
jg1594	0	0	1	4	7	8	5	3	5	7	11	5	17	22	16	36	54	44	79	91	64	107	144	100	216	186	290
jg1595	1	0	0	1514	1417	1136	164	202	209	205	384	267	278	309	343	218	275	259	232	154	109	202	236	245	166	146	190
jg1596	92	122	75	4422	3433	4045	1219	1389	1437	4529	6414	7645	3456	8498	6031	3497	5015	4805	24941	3268	5085	13975	2636	1401	2913	2040	6571
jg1597	3091	3456	3592	2662	2689	2278	708	854	725	1325	2030	1959	2198	2051	1889	1733	2272	1936	910	1394	932	2016	1916	1185	3335	2329	2226
jg1598	9456	11381	9737	2925	3271	2723	2989	3120	3592	6519	7751	6743	5912	5492	5877	6236	6260	4805	3513	4088	3949	3287	3661	3936	3475	3377	2833
jg1599	571	540	534	854	699	531	209	245	219	263	474	537	464	483	514	499	668	627	996	610	771	567	655	573	610	529	517
jg1600	1539	1533	1707	2395	2401	1897	837	993	933	1299	1663	1461	1643	1564	1675	1384	1493	1257	1886	1365	1600	986	1368	1929	871	1018	817
jg1601	229	207	218	68	62	79	24	31	36	72	53	185	65	76	57	115	132	105	91	153	109	188	221	200	412	248	282
jg1602	47087	42713	38244	93570	76949	89024	27504	30160	30635	66358	74174	80315	72595	72770	78795	92900	108114	86132	166266	195537	155621	188299	194463	222182	161496	127451	154885
jg1603	1485	1383	1230	2984	2714	2717	1006	1275	1229	1752	2380	2505	2333	2279	2442	2690	3337	3044	4663	5609	4918	4750	4871	6260	4498	3474	4115
jg1604	1206	1279	1260	1735	1759	1284	660	874	752	930	1291	1033	1123	1202	895	893	1043	921	1204	1195	1108	842	1114	1114	799	733	604
jg1605	100	118	122	157	144	149	99	84	86	149	225	185	190	193	256	239	237	184	201	236	278	240	272	166	225	348	209
jg1606	67	87	79	210	183	172	77	65	78	94	117	155	96	92	92	103	139	124	161	141	147	109	195	192	104	84	102
jg1607	8	10	16	148	218	197	75	101	82	135	164	132	78	119	116	109	92	91	278	222	225	179	261	350	150	127	162
jg1608	12120	13750	12769	3459	4246	3383	2097	2318	2385	5668	7114	5033	5421	4954	4965	5315	5134	3720	1375	2521	1439	2542	2012	2202	4074	3291	2586
jg1609	208	277	297	1133	1246	898	237	323	315	601	555	334	385	372	333	257	235	267	608	318	431	397	564	287	172	499	142
jg1610	153	198	180	174	166	139	60	62	66	131	128	140	118	135	140	111	109	113	86	112	59	64	88	80	79	60	38
jg1611	3450	4566	3944	2413	2703	2082	1748	1582	2285	2982	3477	3018	2935	2444	2637	3615	2954	2083	2885	2102	3637	2103	2797	2002	1722	1572	1539
jg1612	124	152	99	317	332	280	122	176	154	327	401	303	266	230	290	320	322	273	408	317	361	343	364	188	433	653	487
jg1613	12	16	16	36	33	21	2	18	9	9	28	20	19	22	11	11	14	25	14	26	10	9	9	18	14	12	5
jg1615	1049	1056	1150	1780	1816	1395	521	643	617	912	1335	1297	1144	1249	1133	1250	1432	1184	1558	1295	1179	1159	1252	1130	974	1008	894
jg1616	2871	3143	2840	2538	2703	2147	766	773	901	1806	2151	1586	2019	2046	1977	1725	2011	1617	1953	1608	1720	1344	1648	1666	1272	1303	1336
jg1617	895	1053	821	889	901	723	345	348	396	592	663	597	569	550	546	600	703	520	575	519	605	704	707	568	847	971	875
jg1618	926	1117	996	617	747	554	259	333	376	655	836	586	631	652	645	541	672	529	568	501	466	396	429	523	460	426	433
jg1619	295	314	273	368	338	274	52	97	86	307	326	309	532	542	414	398	603	413	234	127	135	160	167	94	230	158	187
jg1621	86	97	108	24	21	23	25	34	43	80	72	60	42	49	64	52	35	57	300	101	475	43	236	86	42	37	42
jg1622	8	6	19	440	705	531	87	139	81	455	372	242	52	82	81	38	61	133	351	104	248	134	153	98	143	153	288
jg1623	6	2	8	6	6	6	2	7	2	31	48	40	75	65	63	205	134	124	47	181	244	300	340	71	559	630	755
jg1624	5	13	6	61	50	46	34	45	73	232	174	132	314	529	890	451	675	541	658	775	853	542	1060	1101	1193	1185	1109
jg1625	1012	1253	1012	1554	1331	2732	667	616	445	2059	2621	2204	4919	3463	3838	2109	3703	4213	1738	1033	1531	3756	2740	1247	2959	1188	1729
jg1626	118	135	170	111	123	137	65	40	53	150	110	144	295	274	261	432	447	492	536	605	575	749	779	616	1400	1151	1522
jg1627	0	0	1	0	5	0	4	2	0	0	1	0	0	0	0	0	0	0	0	1	1	0	0	0	0	0	0
jg1628	57	54	44	51	46	28	3	11	9	16	7	6	12	9	13	0	14	20	24	16	18	6	7	9	6	11	16
jg1629	623	829	779	330	329	273	209	261	315	467	565	374	468	346	327	539	484	332	274	360	275	296	355	262	362	426	250
jg1630	6	10	10	3	6	3	1	4	5	6	1	4	1	1	1	3	3	5	1	6	1	7	3	4	17	5	9
jg1631	181	229	275	113	152	122	56	61	51	197	137	97	140	146	191	190	185	247	146	245	187	304	224	174	793	612	714
jg1632	360	522	432	283	289	205	69	154	89	153	162	184	134	123	157	154	142	131	107	95	99	61	93	88	36	27	26
jg1633	607	591	719	870	846	689	255	293	358	525	823	652	602	618	522	545	693	582	419	525	412	594	782	488	866	752	697
jg1634	2427	2993	2482	1883	2005	1782	1232	1348	1576	2714	2384	2523	2069	1904	1925	2011	2024	1550	1755	1419	1220	1214	1949	1500	1551	2005	1581
jg1635	1147	1132	1085	1164	1145	938	311	351	345	777	1160	657	644	769	646	621	841	758	1225	607	1002	581	664	498	699	630	663
jg1636	2	0	3	6	8	7	1	1	0	5	1	5	2	6	5	3	5	3	3	3	6	22	28	14	3	3	12
jg1638	1793	1984	1777	1928	1989	1601	434	569	518	1056	1707	1337	1126	1215	1265	1053	1371	1325	2711	981	2638	1045	1676	870	1188	1194	1171
jg1639	0	0	0	0	1	0	0	0	0	1	0	0	2	1	3	1	3	1	1	1	1	3	0	2	0	2	2
jg1640	840	996	920	1075	1094	963	252	376	356	742	908	883	548	661	736	630	766	648	1383	1096	927	981	1330	1013	1436	1323	1219
jg1642	2105	2358	2364	4819	5362	4313	2214	2702	3042	5740	5446	4487	2400	2820	2478	1991	1978	1380	2424	2228	2425	3367	3795	2353	3827	5722	4077
jg1643	1219	1319	1372	2286	2560	1893	414	451	474	1021	1722	905	1051	1025	1008	851	1178	1231	4662	1316	3088	1395	2247	1387	1130	955	1311
jg1644	463	545	561	2035	2254	1672	452	531	608	932	995	743	575	689	699	487	636	555	687	667	622	454	573	648	351	374	445
jg1652	421039	371633	549192	40464	54477	29330	34411	27752	27873	111428	208913	129495	185808	173177	171602	115411	169248	133627	18485	12952	14066	19031	17369	16835	8852	74	60
jg1654	1018	1257	1261	774	728	601	331	383	408	355	498	479	277	309	313	228	266	173	266	315	271	187	238	312	114	116	106
jg1655	8	13	11	7	5	11	2	1	3	6	12	26	6	8	16	10	5	4	8	10	10	7	2	5	5	0	6
jg1656	2409	2783	2393	230	288	282	285	318	278	1162	1594	897	1133	961	834	1150	915	595	260	162	413	176	363	212	355	440	350
jg1657	5489	6724	5832	831	776	640	889	1014	1289	2247	3636	2940	2271	2056	2007	2468	3196	2311	529	1126	583	1166	1276	772	1869	1735	1278
jg1658	43804	58221	49626	10993	12913	10374	7574	8172	9608	17708	22342	14836	17410	15150	14607	16180	17720	13351	11769	10171	14346	13873	15786	13040	20955	23922	17113
jg1659	789	842	907	1350	1304	1205	312	425	447	982	1226	1581	2268	2244	1714	2639	3242	2815	2459	1913	1925	1799	1673	1577	2095	1264	1683
jg1660	1433	1720	1493	3387	3376	2533	707	661	723	800	1487	1640	1488	1903	1642	1945	1927	2055	10601	3110	9133	2886	4488	3963	1458	1663	2421
jg1661	575	570	545	337	385	299	180	214	187	367	458	290	434	362	355	333	357	262	155	158	225	163	176	189	315	227	193
jg1662	2487	2838	2511	1642	1864	1420	1176	1181	1550	2248	2970	2572	2222	2061	1705	2072	2169	1465	642	851	785	986	1053	947	1347	1409	948
jg1663	377	409	489	275	294	212	39	45	24	127	131	125	71	111	295	201	144	83	165	467	123	410	684	360	382	569	185
jg1664	80	126	126	88	74	66	9	9	6	27	31	27	23	34	64	27	31	14	34	24	37	59	64	30	100	108	50
jg1665	222	299	323	282	228	149	24	23	20	30	65	62	69	59	41	49	47	28	55	68	21	124	140	22	117	129	85
jg1666	740	1038	996	309	348	284	121	148	114	286	286	326	341	354	442	513	305	327	339	239	210	485	486	194	503	393	464
jg1667	1594	1893	1716	351	376	331	481	441	488	954	1353	981	922	826	734	852	873	641	240	218	207	223	251	225	360	375	235
jg1668	1624	1528	1719	2362	2664	2046	833	1030	1116	1951	2330	1462	1763	1541	1447	1660	1706	1551	962	1203	970	1053	1181	1139	1333	1754	1403
jg1669	1614	1984	1796	1375	1145	991	480	581	568	1008	1388	1337	1394	1432	1326	1192	1580	1449	1256	875	935	777	974	1083	941	957	950
jg1670	5059	5974	5916	10439	10797	8617	3019	3451	3870	6456	6747	6388	5972	5579	6054	6165	6155	5785	12104	6677	10539	5594	7595	6923	5313	4588	5364
jg1672	1815	2124	1948	905	1055	810	309	328	296	894	1118	853	999	984	995	804	1016	772	851	626	713	506	585	661	696	624	725
jg1673	915	1234	1072	654	769	631	449	423	509	914	929	725	622	535	601	609	672	481	445	440	442	348	424	464	595	433	393
jg1675	604	624	544	1377	1428	1065	237	265	223	938	1603	1189	2169	2202	1557	1815	2387	2238	1733	947	1229	1274	1444	799	1992	1118	1661
jg1676	1350	1580	1476	1826	1821	1401	535	649	738	1378	1916	1501	1722	2056	1659	1779	2156	2026	2765	1897	2322	2580	2925	2086	3172	2996	2866
jg1677	10	10	7	18	12	7	6	0	2	3	7	38	5	6	10	5	11	8	7	12	1	21	13	8	8	3	12
jg1678	12	6	10	10	11	7	0	7	10	1	6	51	8	5	1	6	3	13	2	3	14	19	10	4	56	1	19
jg1679	9	5	5	6	10	7	2	1	0	4	3	21	7	4	4	0	8	5	8	3	8	28	64	56	315	0	171
jg1680	0	1	0	1	3	1	0	0	0	0	2	0	0	0	2	0	0	0	4	2	2	2	11	24	23	70	65
jg1681	0	0	1	0	0	1	7	0	0	0	0	0	0	0	3	3	2	4	16	11	15	4	46	28	135	134	161
jg1682	0	0	0	0	0	1	1	0	0	0	0	0	1	0	4	0	3	2	13	1	4	12	39	39	119	77	79
jg1683	1	0	1	2	1	2	0	0	0	0	0	3	1	1	0	2	3	2	1	9	13	24	64	54	185	86	130
jg1684	0	0	1	1	5	0	1	0	0	0	1	1	1	1	7	2	14	9	18	7	9	21	29	19	78	112	136
jg1685	4	3	7	19	11	7	4	2	7	7	19	7	12	26	17	19	44	49	71	81	47	82	131	74	158	265	324
jg1686	13	4	5	21	13	12	6	5	8	19	7	14	21	36	37	44	42	36	45	38	74	87	94	60	138	197	270
jg1687	38	44	50	25	31	22	21	23	17	44	74	30	119	147	143	170	316	226	308	251	358	404	440	302	998	1157	1331
jg1688	2	1	1	3	4	1	0	1	3	4	8	3	8	10	2	5	2	9	10	6	6	30	22	15	34	20	36
jg1689	54	46	32	247	224	184	78	100	87	122	169	170	293	377	380	303	488	513	348	392	281	786	834	378	1153	1065	1097
jg1690	25	47	28	15	22	17	5	19	19	40	37	33	32	53	92	63	74	75	95	92	106	135	198	100	231	222	227
jg1691	357	439	400	278	342	287	88	112	97	226	294	186	247	273	247	188	250	271	385	207	496	258	354	231	407	357	483
jg1692	4	1	5	4	5	3	1	0	2	2	6	2	2	3	6	5	2	0	20	17	68	186	249	50	262	220	206
jg1693	19	16	16	13	37	24	10	9	2	80	27	23	87	162	389	86	116	230	221	14	150	156	34	318	32	245	807
jg1694	11	9	6	29	23	32	4	4	3	37	45	17	48	180	370	50	217	97	461	301	342	479	844	580	1113	1382	1263
jg1695	46	44	73	59	110	72	13	17	21	169	139	61	71	222	642	183	300	279	337	566	575	803	1261	936	1880	1757	2024
jg1696	5	2	3	38	37	21	12	17	16	40	80	26	61	206	548	110	273	147	256	463	488	582	1005	557	1646	1586	1035
jg1697	1780	2401	2079	1830	1982	1643	1100	972	1423	2050	2088	1981	1370	1302	1451	1389	1401	1069	2805	1570	3245	1294	2736	1734	1289	1246	1111
jg1698	576	935	810	1877	2071	1571	542	554	728	549	741	683	804	990	1042	890	985	698	2099	902	951	1833	2013	900	1697	1166	936
jg1699	11040	12864	12105	1127	1166	1069	445	465	497	640	1005	997	579	586	633	359	522	505	175	152	111	126	112	145	60	32	27
jg1700	11	15	4	4	9	7	3	1	1	1	0	1	6	3	3	4	1	4	3	9	9	3	8	0	3	1	1
jg1701	2138	2514	2437	815	905	720	594	563	691	1239	1583	1175	1173	992	989	1153	974	777	392	476	502	375	486	410	635	536	477
jg1702	1816	2232	2012	377	382	394	369	455	428	1195	1315	1105	989	849	802	861	936	723	314	449	393	344	349	382	550	466	381
jg1703	403	355	413	945	918	736	230	326	408	542	596	574	509	562	640	623	762	494	829	605	682	369	432	728	276	438	347
jg1704	58	55	70	696	945	905	814	974	1120	2984	3456	2505	2737	2509	2040	4079	3379	3204	1203	2662	1672	4070	4471	1524	3925	4382	2700
jg1705	1	3	3	8	10	6	0	3	3	6	1	1	5	2	3	2	11	19	64	114	109	34	174	88	26	33	23
jg1706	119	127	153	108	107	92	23	33	42	80	52	63	43	56	50	57	38	51	18	38	29	46	60	14	28	36	19
jg1707	2033	2324	2413	2586	2893	2317	1024	1214	1237	2369	2760	1949	2410	2271	2465	2626	2626	2073	4719	2641	6556	3114	3683	3144	3194	3244	3182
jg1708	423	540	424	904	921	738	131	188	156	846	956	1268	878	940	679	1325	1318	1518	2378	1690	1726	5048	3051	969	2801	3560	2520
jg1709	1251	1619	1393	772	721	655	882	755	1037	1681	1850	1958	1988	2004	2310	2330	2359	1389	2716	1617	4012	1611	1814	2130	1606	1729	1288
jg1710	1794	2236	2264	1251	1359	1176	871	890	1059	1899	2026	1510	1525	1338	1511	1662	1500	1091	1692	1162	2280	1269	1360	1489	1162	1046	1009
jg1712	134	126	181	1446	1396	1108	689	748	751	1862	2313	2510	3768	3541	3152	4096	4439	3773	2631	3833	3011	2868	2885	3142	2886	2617	2454
jg1713	167	187	189	186	242	146	75	79	74	230	326	257	413	429	317	352	418	323	231	209	141	173	168	104	364	302	340
jg1714	711	801	835	320	303	247	324	269	333	442	628	674	482	463	379	700	508	462	131	367	159	349	324	175	281	314	234
jg1715	177	221	221	392	330	333	109	122	105	345	545	845	431	508	650	624	784	555	588	314	449	282	299	305	187	261	336
jg1716	111	142	116	364	365	296	97	96	121	268	331	197	322	331	256	250	353	294	265	236	287	216	234	215	183	122	158
jg1717	241	227	231	492	508	330	57	90	87	133	290	129	184	184	181	177	253	291	596	278	458	388	422	221	501	499	543
jg1718	349	374	371	280	356	285	147	156	186	338	392	260	305	294	264	252	297	262	235	233	247	211	240	207	326	355	304
jg1719	635	655	790	624	641	483	158	186	209	380	563	592	671	618	539	537	720	596	644	355	495	333	426	352	414	359	338
jg1720	477	520	659	391	406	343	134	126	137	214	268	257	351	341	355	303	367	346	296	173	241	276	259	189	250	215	190
jg1721	148	217	197	324	303	236	117	141	139	159	254	241	249	208	183	158	246	216	222	223	155	130	155	177	124	177	115
jg1722	154	120	168	131	154	124	42	44	58	113	149	158	193	162	127	174	184	124	133	108	127	107	149	138	234	220	127
jg1723	88	163	119	128	153	149	92	114	147	95	102	107	107	97	47	30	82	43	13	17	21	23	12	10	18	16	16
jg1725	0	0	0	0	1	0	0	0	0	0	0	0	0	0	0	0	0	0	0	0	0	0	0	0	0	0	0
jg1727	481	608	584	1828	1888	1527	483	544	534	871	1110	1149	852	922	859	828	943	895	1178	1017	876	488	678	985	472	437	388
jg1729	48	66	43	335	323	292	70	75	106	130	164	208	149	140	148	112	142	120	186	158	164	96	140	154	73	64	86
jg1735	202	213	186	456	530	414	179	230	213	367	388	364	418	459	460	388	516	446	679	588	551	711	863	659	903	851	853
jg1736	14	15	8	21	21	20	6	8	8	14	7	10	11	9	9	6	16	0	1	2	7	7	4	12	1	4	2
jg1737	0	0	1	343	303	282	96	119	133	153	125	119	49	58	39	44	38	16	0	8	6	2	5	2	0	0	0
jg1738	10	3	7	5	13	2	3	1	4	1	1	4	4	4	3	2	7	8	3	1	3	1	2	0	1	1	0
jg1739	177	200	210	833	793	552	237	336	331	286	404	447	398	394	398	313	355	356	497	401	409	279	340	369	151	153	152
jg1740	673	632	732	500	482	420	123	178	161	191	384	331	220	265	292	216	287	264	133	145	169	220	259	201	379	424	254
jg1741	591	622	569	356	429	323	124	167	166	317	428	406	410	398	487	481	497	462	621	347	414	608	649	376	594	532	605
jg1743	930	1021	1097	116	118	113	207	182	195	288	520	547	1100	608	784	410	373	519	1852	350	1648	494	771	603	170	287	272
jg1744	0	0	1	1069	1018	2115	215	227	60	1473	1297	2301	4503	3859	3776	3269	3876	3579	166	365	166	1387	905	172	2550	868	1795
jg1745	0	0	0	0	0	1	0	9	0	0	2	5	2	1	3	1	2	0	9	0	2	2	1	3	41	14	30
jg1746	1074	1139	1317	1189	1314	1139	228	336	334	477	770	457	344	319	397	242	270	312	242	216	171	181	194	142	248	319	265
jg1747	13	19	23	12	16	7	15	5	3	7	17	13	16	8	9	14	6	13	3	5	4	14	7	6	262	23	99
jg1748	605	707	631	285	369	265	256	215	318	684	763	591	859	649	533	747	767	442	198	238	226	164	168	193	270	265	189
jg1749	10	4	3	12	11	7	0	6	7	5	14	33	9	10	11	9	5	13	5	12	5	2	4	4	11	3	4
jg1751	410	313	336	644	621	556	201	212	240	420	615	480	668	722	712	688	801	629	1100	747	1160	488	1025	426	603	487	530
jg1752	52	54	49	109	74	113	37	22	63	91	88	60	140	181	187	162	224	291	393	334	440	464	368	339	978	701	804
jg1753	19	21	23	16	32	30	37	25	23	105	136	66	667	1827	3039	2157	1691	868	1412	2569	2281	6708	3469	2055	5637	3292	3624
jg1754	25	23	33	46	42	24	8	2	8	40	33	39	19	58	37	68	61	103	121	105	103	124	167	107	209	188	256
jg1755	5867	6533	6111	9098	8562	7801	1995	2222	2268	3627	5731	5419	4215	4078	4002	4306	5316	4246	3815	2583	3967	3444	4810	3040	3329	2999	3285
jg1756	2797	3315	2804	1790	1848	1654	575	727	687	1650	2782	2339	2079	2197	1956	1756	2533	2160	2180	881	1588	1064	1490	842	971	852	1036
jg1757	35	39	40	55	76	68	13	11	18	23	28	68	43	56	43	48	62	56	69	41	38	26	31	27	23	25	10
jg1758	51	62	90	328	302	365	39	50	58	327	668	1329	276	1017	729	567	1623	1171	2037	1086	1368	268	303	760	337	559	651
jg1759	18	32	29	132	189	111	21	26	15	40	48	213	43	61	34	48	66	56	37	33	55	13	16	14	27	12	5
jg1760	847	851	1075	1776	1566	1498	663	816	902	1071	1705	1655	1593	1538	1372	1392	1718	1491	2220	1287	1858	1074	1391	1144	594	502	497
jg1761	554	574	668	1888	1926	1509	280	361	316	616	851	701	573	711	717	578	778	811	1820	1037	1231	1744	1651	1108	1070	895	997
jg1762	372	449	449	449	440	405	169	210	219	361	530	472	554	645	634	629	833	809	919	801	850	1160	1288	1057	2054	1891	2051
jg1763	530	564	537	1156	1223	1000	110	139	128	182	337	264	222	241	207	102	218	322	2088	367	1890	340	1201	429	246	209	245
jg1764	285	383	293	586	635	503	162	116	164	856	1405	686	952	1096	965	1013	1441	991	484	699	492	570	535	409	1292	732	1212
jg1765	1122	1055	1090	1273	1334	920	321	405	458	726	1317	876	986	1052	873	891	1069	1047	2661	1018	2133	938	1137	1503	688	626	563
jg1766	1	4	3	2	9	5	2	0	1	5	5	32	4	7	8	9	4	12	12	2	9	5	14	4	31	14	133
jg1767	0	0	2	0	0	0	0	0	0	0	0	0	1	0	0	3	1	1	1	2	1	10	11	2	11	2	1
jg1770	95	93	106	191	171	131	101	68	95	183	235	190	382	283	544	396	453	663	441	672	546	787	971	491	1346	1274	726
jg1771	61	75	83	159	137	131	61	105	104	140	297	160	222	490	496	274	703	709	976	830	587	713	1619	1086	1525	1608	1137
jg1772	20	22	13	17	24	7	7	3	6	27	35	32	7	23	53	8	2	44	14	2	85	26	15	17	121	343	126
jg1773	23	21	22	33	36	21	12	14	18	25	48	32	21	19	26	47	39	61	49	72	104	54	75	40	153	144	113
jg1774	772	957	905	775	780	670	252	276	337	658	945	639	692	667	642	644	764	635	822	573	699	579	707	595	684	648	589
jg1777	40	26	25	27	17	17	6	11	7	19	33	33	11	26	23	15	56	27	51	19	38	19	75	36	90	112	66
jg1778	681	683	784	170	231	120	159	142	139	328	620	268	337	194	242	313	234	273	88	112	108	149	69	89	141	95	143
jg1779	780	853	755	620	702	554	154	161	193	310	357	326	247	325	385	219	339	287	355	266	304	298	449	278	544	687	511
jg1780	1488	1683	1391	963	944	769	671	719	803	1629	1716	1613	1494	1418	1397	1720	1592	1302	634	1059	966	1288	1381	1051	1399	1429	1202
jg1781	30	41	38	996	974	771	209	232	301	576	573	507	461	408	429	821	918	792	1442	961	938	994	1275	2077	1482	1796	1318
jg1782	54	70	61	97	112	109	69	83	56	202	190	157	197	265	201	237	267	226	469	294	267	540	572	428	998	539	716
jg1783	224	252	164	306	306	241	164	191	184	455	528	452	558	560	503	676	486	413	389	503	239	740	575	371	658	695	465
jg1784	1053	1239	1096	716	732	631	375	330	417	659	1150	1030	929	981	923	1071	1151	1028	1137	766	708	1061	1033	841	1182	1187	1089
jg1786	1101	1316	1206	589	615	474	297	345	306	466	681	737	776	724	562	596	758	567	372	373	282	290	354	487	442	359	411
jg1790	910	1006	903	802	665	618	389	448	444	621	865	1089	1319	1368	1011	1711	1752	1273	801	779	685	761	606	539	1213	728	1008
jg1791	0	0	0	0	2	0	0	0	0	3	0	0	0	1	0	0	138	28	0	90	108	2	929	3	616	9393	902
jg1792	3873	4638	5178	4562	4237	3754	2198	2412	2791	3314	3802	5225	3746	4120	4183	3783	4724	3857	4365	3872	4392	3348	4746	4108	3805	3565	3118
jg1793	4034	4336	4379	4839	4880	4106	2288	2416	2555	3324	4550	5849	4780	4453	4495	5063	4886	4177	3924	4180	3960	3334	3618	3586	3691	3428	3107
jg1794	581	552	560	852	915	785	162	184	185	271	491	386	334	420	286	370	476	448	1475	488	973	581	728	536	558	649	610
jg1795	15	13	5	17	19	7	6	2	3	3	7	11	15	21	10	41	38	23	114	69	50	153	143	160	243	230	366
jg1796	103	122	133	115	122	97	77	82	68	81	133	134	125	111	97	69	119	97	75	107	100	92	92	113	84	73	75
jg1797	1609	1769	1781	1923	1996	1591	523	654	610	1119	1728	1359	1990	2231	1987	1893	2226	2032	2221	1483	1870	2278	2246	1432	1935	1628	1771
jg1798	5	4	2	152	139	108	38	50	53	82	109	54	86	72	64	60	89	67	73	75	88	37	69	61	14	2	6
jg1800	1351	1286	1216	1127	1148	895	367	348	341	570	842	720	535	525	497	375	570	566	514	349	412	286	375	352	318	238	301
jg1801	770	859	780	730	861	601	396	454	454	715	838	636	828	693	789	668	668	588	694	664	775	621	600	553	527	627	448
jg1802	21	29	22	97	143	60	39	55	24	32	58	69	40	51	42	54	53	38	104	98	103	37	80	111	25	32	34
jg1804	13	9	11	62	43	29	2	19	42	23	13	29	13	22	22	7	14	14	34	50	22	23	33	29	14	15	27
jg1806	251	363	322	969	1234	990	278	368	346	717	1062	994	769	947	905	690	951	866	807	468	454	720	715	467	551	503	584
jg1807	1	2	2	0	0	1	0	3	0	1	3	0	6	2	1	8	0	0	1	1	0	0	1	0	0	1	2
jg1808	93	165	252	34	55	52	6	19	18	62	34	26	129	136	141	64	36	63	199	32	70	149	24	105	264	193	51
jg1809	7	8	9	4	9	9	16	12	12	22	23	38	24	27	37	23	35	39	5	9	14	96	96	37	116	72	98
jg1810	10	29	22	16	18	8	15	19	14	40	32	40	27	44	93	29	29	83	14	41	25	421	234	104	648	456	607
jg1811	53	66	70	82	87	74	38	48	72	369	127	134	416	601	839	1124	2155	2708	4903	5864	4954	6963	10989	8251	15345	17394	34769
jg1812	41	42	37	35	47	37	72	29	59	335	137	183	592	744	955	1480	2188	3253	3272	5179	4183	6325	9313	6909	14273	17788	22442
jg1814	0	0	0	2	3	1	0	0	1	5	3	2	10	20	6	17	12	6	6	6	6	88	23	33	103	26	20
jg1816	0	2	1	111	91	80	33	28	52	104	104	102	113	130	128	155	148	140	161	209	125	405	413	159	513	406	257
jg1817	0	3	0	5	6	6	4	10	2	14	10	13	11	37	45	23	34	59	14	18	19	134	34	43	235	112	77
jg1818	0	2	4	4	13	5	4	3	9	19	28	31	19	26	17	54	30	21	89	89	93	173	166	80	452	168	173
jg1819	7	4	5	347	391	317	165	206	207	383	477	305	311	305	345	311	310	390	737	425	470	984	1062	432	1503	1834	1510
jg1820	3	0	3	11	14	9	6	2	10	15	17	13	20	22	25	17	23	35	12	16	24	149	49	49	279	108	84
jg1822	0	3	0	3	0	0	1	0	0	3	1	1	13	5	6	8	5	9	9	4	0	25	7	5	39	13	9
jg1823	0	4	1	4	3	6	3	1	0	8	13	5	16	23	13	15	24	36	10	6	8	53	29	20	82	42	39
jg1824	135	238	121	656	691	785	1582	1502	1988	2911	2258	2575	1048	965	2652	117	145	193	2	3	2	5	2	5	3	1	17
jg1825	0	1	0	4	5	1	4	0	2	5	6	4	0	12	10	6	8	22	18	20	38	55	70	11	376	224	377
jg1826	1	3	1	2	2	1	0	0	0	2	0	0	1	5	6	0	0	10	1	1	2	8	1	0	8	10	30
jg1827	16	18	14	5	4	6	2	2	3	7	1	6	23	49	198	86	76	279	588	438	237	4990	1571	319	3527	1122	3123
jg1828	13	14	16	3	8	8	3	1	4	0	17	20	1	4	4	0	6	5	2	3	1	22	10	1	19	0	320
jg1829	10	3	9	6	6	7	0	0	2	3	2	3	7	9	47	12	98	81	251	905	320	6111	5212	1012	14808	2900	9797
jg1830	145	146	148	811	722	624	210	229	242	351	403	392	328	369	401	323	349	320	700	528	576	377	473	628	253	271	215
jg1831	362	445	448	440	549	475	233	229	287	480	414	1042	353	355	483	325	505	320	605	503	496	332	803	540	361	383	270
jg1832	354	437	364	215	242	202	173	138	205	404	353	500	451	338	311	478	411	259	329	186	331	198	312	235	288	291	206
jg1833	12	5	8	5	3	6	0	2	1	8	5	2	7	15	6	9	6	8	10	4	9	8	10	5	21	16	1
jg1834	48	60	73	23	9	13	11	11	6	55	44	27	79	107	89	89	104	90	54	43	42	60	56	50	93	175	84
jg1835	17	32	20	51	105	67	18	15	20	57	78	60	50	57	33	78	102	119	153	212	156	145	238	169	181	297	311
jg1836	18	14	12	28	25	22	29	22	19	30	35	30	22	15	36	32	17	16	19	20	34	26	59	54	41	48	25
jg1837	35622	57977	58924	3793	4835	4959	7855	9112	10493	22389	25105	22103	22187	23907	28002	25595	25188	22603	3695	15508	6822	46767	38294	4546	59810	69795	84267
jg1838	4489	7153	8215	737	356	931	1385	2065	1845	5379	3099	2969	5108	5427	6651	6436	2943	3701	619	1443	1334	9371	3225	442	13772	3636	7118
jg1840	32	75	52	10	17	6	13	18	14	33	38	54	32	13	23	32	48	40	8	72	16	61	59	16	71	257	75
jg1839	663	776	369	234	218	303	525	541	512	1780	1640	1827	1450	1726	1648	2089	1223	1216	359	672	1309	2238	2419	336	6814	2975	6745
jg1841	5322	8881	8876	273	404	407	1277	1538	1532	3325	4375	3876	4686	5069	5562	6147	5979	5285	1123	3390	1347	13727	8144	1240	10298	12629	14723
jg1842	170	198	162	164	178	163	102	112	129	183	236	139	155	146	149	144	163	143	138	111	117	112	138	129	102	123	45
jg1844	15	16	20	150	133	142	37	60	56	69	72	97	58	45	93	61	66	51	117	116	98	66	105	70	34	43	37
jg1846	0	0	0	1	0	3	0	0	0	0	0	0	0	0	1	0	1	1	3	1	1	1	3	3	0	0	0
jg1847	1	4	0	2	0	1	1	0	0	0	0	0	0	2	0	1	0	0	1	1	0	0	0	0	0	0	0
jg1848	0	2	0	0	4	0	5	0	0	4	0	1	19	8	15	58	61	45	57	69	52	24	90	92	39	45	53
jg1849	359	376	371	140	146	104	39	42	53	233	319	294	259	218	231	212	281	220	59	46	80	69	91	85	173	115	144
jg1850	745	771	789	1066	1043	942	454	547	480	868	1263	1179	809	909	891	880	1081	989	1840	1132	1732	871	1221	1107	969	890	541
jg1852	359	412	424	342	328	285	113	163	168	277	320	237	277	217	300	203	208	207	373	223	289	158	197	205	208	183	146
jg1853	1	2	0	10	15	16	2	8	1	6	15	17	10	14	25	8	3	9	10	10	6	5	3	3	3	1	1
jg1854	733	808	836	88	135	111	130	127	136	292	431	272	301	275	185	330	256	265	64	76	92	102	76	82	189	160	94
jg1855	457	608	510	218	240	187	240	207	337	539	469	445	357	299	324	385	286	216	515	301	502	197	279	321	209	230	221
jg1856	5883	7023	6729	4080	4384	3393	1792	1934	1861	3496	3968	3643	3303	2925	3837	3156	3169	2707	4291	1796	3269	1662	2105	1872	1821	1563	1569
jg1858	672	693	691	1161	1324	1076	580	626	703	865	1266	1232	1128	1155	1067	835	1112	853	697	678	585	825	863	731	881	875	512
jg1859	90	218	135	133	46	90	23	33	19	58	23	32	101	106	152	144	184	227	651	57	654	243	58	35	561	1854	1349
jg1860	1456	2861	1972	260	256	245	155	149	162	472	510	486	894	1137	1528	1200	1698	1856	1256	489	1661	2881	999	279	4277	4565	4597
jg1861	1280	1516	1519	1226	1293	1144	504	494	568	1467	1611	1165	1326	1381	1198	1118	1133	955	651	598	426	824	724	491	877	961	797
jg1862	477	573	689	816	778	760	198	282	247	533	623	643	871	1124	1156	736	1094	966	14620	3283	17925	1374	4140	5444	1086	1020	1228
jg1863	2	3	3	6	4	2	0	1	2	0	4	15	10	10	11	15	11	11	11	14	14	8	20	10	15	12	21
jg1864	108	92	108	270	212	234	26	17	48	110	101	93	177	168	117	184	134	131	377	164	613	235	364	141	236	79	293
jg1865	988	865	802	3875	3659	3333	240	275	272	986	1225	851	846	951	1068	547	1144	1167	13718	3810	10925	4101	5699	3104	1198	533	1821
jg1866	21	44	61	38	40	42	15	12	22	21	31	19	37	54	51	38	39	35	41	32	49	73	84	78	69	72	61
jg1867	192	207	212	110	97	100	51	62	44	93	109	111	148	199	178	140	224	165	155	181	204	235	333	301	340	271	242
jg1868	14	13	12	16	23	13	8	9	4	7	12	23	14	9	9	7	14	3	14	3	8	15	18	18	15	8	7
jg1870	350	411	436	291	267	272	197	296	302	555	688	496	530	482	449	434	482	352	331	292	360	161	270	220	159	257	222
jg1871	7	10	8	103	130	111	49	40	38	56	89	112	68	84	93	89	91	77	131	89	101	153	143	79	114	113	71
jg1872	50	73	79	826	902	683	171	210	234	331	436	383	270	331	367	360	377	368	592	530	659	300	419	521	138	167	137
jg1873	47	78	76	728	529	566	197	61	60	398	394	841	182	258	381	292	327	313	697	811	816	176	211	318	114	70	70
jg1874	3	6	12	56	52	60	17	16	16	52	39	37	32	43	31	28	31	40	63	39	83	151	130	71	206	131	308
jg1875	229	235	229	1025	989	883	395	432	516	602	772	791	770	899	1027	648	875	905	6462	4444	5383	2612	3680	5737	1091	1246	1139
jg1876	0	0	0	0	0	0	4	0	1	0	0	3	1	0	1	4	2	6	5	20	13	8	18	28	45	26	15
jg1877	4	0	8	7	6	2	3	4	2	21	13	13	33	36	28	97	84	58	287	323	307	132	305	594	543	222	439
jg1878	1108	1437	1240	1265	1257	1060	655	678	905	1829	1982	2173	1675	1569	1477	1673	1673	1427	2443	1213	2923	1605	1528	1632	978	1099	860
jg1879	626	629	560	630	588	605	221	282	281	405	598	549	519	640	681	441	645	484	974	910	1064	738	871	839	594	950	1227
jg1880	46	23	23	122	129	92	52	48	54	166	150	154	122	107	64	73	128	109	295	201	97	524	550	199	306	290	273
jg1881	3	10	8	2	2	0	3	0	1	0	2	0	1	1	1	6	12	6	1	2	1	21	10	12	30	31	25
jg1882	16	11	19	46	52	55	13	32	35	59	76	56	59	74	55	88	82	73	163	88	109	88	154	137	91	123	103
jg1883	10	5	3	2	4	6	2	4	1	1	5	3	8	17	7	8	5	1	10	4	14	22	9	2	50	60	42
jg1884	0	0	0	0	0	0	0	0	0	1	0	0	0	1	0	1	0	0	0	0	0	0	0	0	1	1	0
jg1886	18	4	0	35	62	45	20	21	21	2	52	191	6	17	35	17	92	84	44	157	221	48	164	166	92	204	249
jg1887	241	233	240	867	1163	643	168	238	248	353	598	234	527	643	514	437	373	472	849	640	841	736	1040	690	825	459	1182
jg1888	1	3	4	24	21	25	5	6	7	5	27	28	13	18	6	26	34	11	72	54	66	100	103	111	93	101	92
jg1889	178	175	187	210	253	157	72	58	41	120	163	182	165	186	144	154	217	177	363	163	260	147	209	175	131	144	124
jg1890	2750	2958	3288	2734	2858	2514	831	963	1080	1874	2601	2582	2900	2628	2585	2383	2933	2250	5635	2328	5073	2374	3745	2529	1485	1640	1827
jg1891	23	17	27	33	45	23	6	10	10	15	22	95	42	56	55	77	45	60	141	110	153	133	183	173	225	171	196
jg1892	153	185	205	214	227	211	118	99	148	311	423	278	352	342	219	337	390	290	264	290	262	231	277	191	294	260	268
jg1893	43	55	67	124	166	113	13	32	12	58	73	64	53	51	59	49	45	54	114	44	79	26	43	55	52	43	42
jg1894	7	9	12	230	239	200	88	65	78	86	116	115	94	110	96	86	84	111	182	120	101	53	78	64	26	26	13
jg1895	3	7	0	124	114	105	34	55	63	38	59	41	41	53	39	31	44	41	69	50	63	23	44	42	13	14	15
jg1896	2215	2576	2596	1686	1791	1557	751	885	985	1508	1770	1755	1537	1551	1602	1384	1502	1389	2036	1180	1586	1121	1548	1372	1257	1182	1122
jg1897	210	200	251	155	172	100	50	58	46	158	179	93	124	118	111	126	118	108	243	62	140	64	80	51	98	121	65
jg1898	1	9	8	9	15	7	0	2	7	10	7	9	9	7	5	5	7	5	21	21	7	4	9	12	9	1	2
jg1899	110	157	116	251	279	215	110	113	91	236	373	313	346	372	358	324	463	350	113	234	154	80	82	90	168	83	86
jg1900	242	250	235	283	327	369	342	489	440	2229	2505	1449	3375	3270	1979	2018	2978	1678	3393	1108	2326	3209	3664	1668	1978	1693	1471
jg1901	398	387	396	658	691	499	183	241	194	418	749	490	320	399	407	261	434	354	739	384	660	280	421	284	325	314	300
jg1902	10	15	14	521	475	442	313	393	327	751	741	511	604	807	1128	772	975	818	1405	495	1520	1118	1148	362	1212	1426	1387
jg1903	1	0	1	17	25	22	8	4	8	22	54	21	52	91	52	122	132	221	1137	333	721	496	459	370	672	351	440
jg1904	69	92	106	62	45	27	13	13	20	34	30	23	28	38	26	18	13	12	18	14	7	12	15	11	15	12	19
jg1905	4054	5146	4030	2095	2267	1983	2747	2301	3109	4828	4862	5255	4333	3973	3025	4330	4199	2890	1482	1808	1941	1710	1740	1775	1672	1695	1369
jg1906	576	692	633	353	422	333	194	168	247	457	606	471	374	336	352	353	421	300	325	263	398	198	241	192	275	297	217
jg1907	12	13	4	129	139	131	43	81	51	116	175	168	114	175	145	135	152	165	195	205	134	350	463	111	156	368	150
jg1910	3	5	3	2	1	1	2	0	0	3	4	3	1	6	3	1	5	10	1	1	3	4	5	1	0	2	3
jg1911	1	0	3	21	23	14	7	10	9	28	17	19	16	34	16	45	34	44	70	49	43	72	51	53	63	74	63
jg1912	19	25	24	23	14	39	14	26	16	56	50	256	75	175	244	275	379	366	76	126	77	89	70	123	112	90	241
jg1913	11	17	0	0	0	0	0	0	0	2	3	0	19	9	12	22	23	33	63	33	52	42	65	59	74	66	52
jg1914	0	0	0	3	2	2	2	0	3	5	1	1	7	11	12	9	18	18	62	39	22	61	72	45	68	96	168
jg1915	151	122	165	691	649	482	163	170	156	164	264	254	238	253	317	260	249	216	564	311	370	269	341	372	160	130	125
jg1916	9053	10954	10030	2936	3086	2575	2344	2513	2587	4362	6401	5097	4580	3941	3742	4459	4741	3380	3520	2562	4070	2190	2871	2316	2683	2518	2048
jg1917	9	6	3	23	16	17	5	10	11	14	17	181	3	9	7	7	15	12	58	24	49	10	20	20	8	9	24
jg1918	0	0	0	0	0	0	0	0	0	0	1	0	1	1	0	0	0	2	0	0	3	0	0	1	1	0	0
jg1919	11	26	5	206	167	215	11	50	79	22	30	49	295	549	162	1521	1318	640	105	555	231	771	630	703	4611	2602	1818
jg1920	337	375	338	551	621	488	129	196	224	456	588	421	609	746	786	891	1127	978	756	826	682	929	914	578	1134	1140	1066
jg1921	16	17	17	49	21	33	11	28	10	26	29	13	44	44	88	46	100	92	90	88	112	167	163	127	301	193	302
jg1922	1	0	0	2	0	4	1	1	0	6	2	4	4	2	3	1	7	2	2	12	14	5	26	15	19	5	9
jg1923	252	289	330	2069	2150	2014	991	1046	1160	2489	2185	2377	1004	1655	1454	1109	764	674	1108	1007	758	1244	2161	717	1723	1977	1774
jg1924	603	741	796	1281	1348	960	319	373	455	876	1235	858	727	812	821	609	850	821	1647	831	1308	999	1176	863	1118	886	828
jg1925	305	352	363	329	320	223	121	160	159	208	332	346	330	325	264	289	367	297	324	292	257	207	286	284	243	212	219
jg1926	105	103	103	103	126	112	32	44	32	68	67	95	112	67	89	65	100	83	95	91	80	86	112	84	54	52	80
jg1927	76	100	131	82	73	48	14	28	27	32	36	56	63	63	68	49	46	33	65	94	44	28	52	49	14	26	18
jg1928	0	0	0	1	0	0	0	0	0	0	1	0	0	4	3	0	0	0	0	2	1	0	2	2	1	0	2
jg1929	6	1	3	189	169	127	36	43	64	55	41	123	74	71	116	72	119	86	125	85	81	67	63	88	31	32	30
jg1930	6	2	5	62	55	75	24	64	68	220	133	73	189	313	338	332	376	273	378	186	288	595	286	185	636	531	686
jg1932	271	239	232	3187	2709	2875	268	615	515	1123	1054	846	1225	1654	2079	875	2348	2387	31393	22235	49267	12997	24460	30027	6086	15821	13302
jg1933	44	49	52	76	90	67	25	46	39	112	95	80	98	137	200	140	170	244	407	300	360	371	568	366	860	837	630
jg1	0	0	0	0	1	1	0	0	0	1	0	2	2	0	0	0	0	0	0	0	0	0	0	0	0	0	0
jg3	5885	6709	6629	1481	1676	1230	2631	2357	3200	5463	6058	6227	7537	5361	4432	8222	8043	5035	1395	3193	2876	4870	3083	3461	7943	8972	6742
jg4	2	3	2	1772	1750	1374	285	412	465	735	579	537	265	286	268	142	244	165	0	5	0	0	0	0	4	1	0
jg5	2856	3376	2900	1638	1615	1463	940	890	1077	2493	2962	2763	2099	2072	2296	2575	2593	1889	5674	2452	5705	2018	2726	4540	1566	1513	1292
jg6	439	423	446	364	437	370	167	248	289	545	625	507	545	526	515	514	577	572	1531	795	1500	566	787	689	784	749	731
jg7	8	3	6	7	8	11	9	4	3	6	3	13	5	8	4	5	10	9	6	5	5	5	6	7	10	12	12
jg8	13	26	26	346	362	292	104	118	110	216	170	192	179	166	182	158	221	246	538	358	507	243	364	565	210	275	216
jg9	16	17	17	19	33	33	11	8	4	16	11	27	11	20	14	10	18	13	15	26	40	8	10	25	18	17	18
jg10	41	44	56	210	244	177	110	170	174	384	178	261	273	291	299	309	327	326	258	487	356	638	685	375	790	682	856
jg11	1887	2088	2278	2316	2679	2045	766	935	1028	1768	1927	1516	1380	1359	1342	1147	1410	1245	1399	1440	1258	957	1099	1238	876	620	803
jg12	1332	1606	1383	658	683	540	487	484	527	1249	999	1132	1136	1119	1132	1273	1192	952	1018	744	1270	666	888	912	779	803	688
jg13	5500	7633	6194	1791	2208	1767	2233	1900	2602	4868	5206	4568	3878	3352	3419	5421	4734	2904	2153	2327	3650	1693	2216	2307	1666	1801	1467
jg14	1152	1409	1458	2020	2146	1864	579	621	649	1648	1831	1355	1174	1301	1495	1048	1332	1149	2442	1325	2594	1443	1539	1373	1618	1793	1713
jg15	2338	2940	2599	2731	3026	2444	707	874	1020	2102	2233	1792	1501	1499	1608	1607	1819	1360	1595	1269	2098	1141	1461	1119	1358	1363	1432
jg16	3120	3472	2918	6173	6291	5951	3100	3516	3518	8832	9919	8103	5430	6329	5392	6861	6027	5575	6380	5229	5317	5345	5412	4494	4913	5443	5012
jg17	2	9	7	400	382	300	134	136	130	280	243	247	164	181	180	152	206	164	327	301	252	287	276	646	259	369	328
jg18	698	809	785	785	794	633	264	256	340	673	765	577	548	612	667	523	673	500	554	616	626	593	766	700	875	954	812
jg20	68	86	87	1285	1270	1023	565	646	603	649	891	1041	696	782	764	656	705	656	829	799	738	476	676	717	329	299	269
jg21	50	62	58	89	123	70	39	40	24	87	113	93	85	743	1358	196	625	111	686	650	562	476	611	400	696	456	535
jg22	2	1	2	0	0	1	0	1	1	0	0	0	0	0	1	0	0	2	1	4	2	0	5	2	4	5	9
jg23	1796	2503	2117	1493	1348	1179	382	437	329	839	1133	850	727	922	541	505	865	691	597	391	544	862	1030	519	799	408	456
jg24	232	246	148	42	73	34	41	25	27	65	50	64	25	29	54	17	28	16	1	2	10	4	8	4	18	9	8
jg26	547	517	534	1622	1714	1350	255	351	259	730	1220	877	1236	1241	980	725	1094	1208	1666	888	1364	741	762	803	785	718	857
jg27	1384	1593	1515	1550	1508	1305	586	682	673	1217	1500	1396	1216	1257	1260	1163	1386	1154	2098	1098	1746	931	1205	1134	1038	951	964
jg29	680	644	574	731	696	707	206	254	261	809	906	840	1086	1065	1081	751	1059	1144	1965	970	2408	1044	2358	916	930	895	761
jg30	16	28	27	72	104	63	18	32	19	31	40	41	30	38	35	46	28	29	64	40	69	19	49	39	9	10	22
jg32	24	30	30	99	125	67	29	29	42	46	50	50	39	26	21	30	29	38	54	46	28	28	43	48	8	16	2
jg41	3	6	5	189	218	192	47	60	56	154	153	135	179	225	234	162	221	189	554	297	429	380	340	246	385	325	370
jg42	522	690	538	2224	2492	1754	465	607	497	1597	2807	2057	2640	2879	2540	2474	3505	3111	6636	3689	4651	3734	3832	3073	3036	2121	3013
jg43	55	62	89	38	78	41	27	34	42	51	67	42	27	18	33	19	28	20	26	45	36	21	43	69	48	29	40
jg47	46	60	69	571	554	473	186	234	238	250	300	363	342	351	359	334	335	336	475	445	473	266	408	493	211	200	199
jg48	1	1	0	4	7	5	6	4	7	35	48	27	99	145	172	118	87	136	33	85	64	125	91	44	84	93	38
jg49	0	0	0	2	4	1	0	0	0	0	2	0	0	0	5	0	3	1	1	5	6	0	3	5	6	2	1
jg50	217	211	217	584	569	580	156	206	237	352	393	442	526	399	557	430	438	470	422	386	372	483	432	386	254	245	292
jg51	1492	1981	1670	871	855	791	382	421	444	893	1214	1022	1034	984	894	1129	1096	1033	2040	1012	1963	961	1533	1028	1039	1090	940
jg52	4793	5871	4955	1649	1700	1422	1515	1386	1787	3772	4907	3982	2993	2813	2755	3056	3263	2265	3467	1927	3406	1643	2253	2228	1698	1624	1323
jg53	1108	1417	1160	660	736	602	770	608	915	1476	1880	1999	1566	1247	1084	1627	1220	1044	675	732	1070	593	715	824	681	632	481
jg55	2084	2325	2200	2529	2491	2110	878	991	920	1543	2353	2372	2053	2269	2101	2263	2466	2074	3428	1857	2890	1859	2189	1774	2054	1684	1787
jg57	2063	2423	2281	1486	1562	1562	675	836	925	1277	1776	2302	1662	1904	1812	1186	2185	1434	1514	1354	1338	1552	2225	2595	1328	1505	1644
jg58	859	899	980	975	1100	904	403	437	448	790	1073	851	741	773	779	755	935	792	1167	725	821	730	1053	747	645	616	511
jg59	1308	1541	1714	777	833	701	423	368	464	1073	1324	1206	1059	1017	1105	1047	1062	992	1690	766	1304	762	805	716	702	766	750
jg60	937	1070	1101	529	632	480	237	302	323	690	704	613	547	522	597	528	629	531	766	458	572	502	566	432	639	551	534
jg61	137	184	161	2228	2317	1910	708	753	825	1045	1355	1369	841	933	1056	779	931	766	663	801	705	405	517	573	179	122	185
jg62	20	37	16	123	132	144	30	23	25	66	79	131	79	79	91	103	125	105	85	79	104	115	126	77	72	26	59
jg63	2216	2363	2211	637	734	555	501	514	625	1157	1365	1129	1046	939	917	1020	1076	876	480	553	564	512	615	512	740	740	571
jg64	351	417	437	548	506	480	92	131	135	227	355	239	244	216	218	182	237	228	1678	669	2577	294	497	1038	207	263	287
jg65	782	933	880	1083	1050	751	433	460	484	840	1146	1246	1400	1427	1172	1319	1516	1449	1510	1309	1240	1404	1655	1260	1586	1689	1381
jg67	3224	3724	3506	499	629	513	626	674	630	1702	3033	1942	1761	1487	1168	1861	1892	1259	113	231	127	377	241	216	680	553	486
jg68	476	567	459	201	250	222	156	152	207	390	389	334	307	288	274	325	289	254	569	303	707	257	648	407	189	271	243
jg69	98	102	105	942	1004	670	331	392	386	361	503	459	382	483	463	353	404	303	974	762	770	511	776	972	375	359	304
jg70	2390	2282	2585	4816	4347	3609	1463	1512	1733	2438	3783	3893	3290	3427	3250	3588	4146	3661	8184	6607	5733	3005	3738	6291	3183	2899	3187
jg71	217	219	201	179	173	173	55	51	61	144	179	148	150	157	135	119	129	121	197	137	126	120	125	153	122	111	84
jg72	0	0	0	1	2	0	0	2	3	2	6	0	0	0	0	0	0	1	0	0	1	0	1	0	0	0	0
jg73	9	13	9	12	29	21	17	10	12	38	34	47	114	237	170	118	178	200	91	126	146	296	217	96	93	69	75
jg74	6	3	3	11	12	11	15	5	15	57	73	23	59	86	52	90	90	134	43	57	58	77	57	31	30	18	28
jg75	0	0	0	0	0	0	0	0	0	1	0	1	0	10	15	0	4	4	21	37	34	67	135	69	413	176	213
jg76	0	0	0	0	2	3	2	0	0	6	3	0	17	20	22	11	24	33	9	16	27	36	63	18	164	178	170
jg78	510	561	645	650	650	507	196	230	205	295	525	607	453	507	514	478	601	524	1153	491	900	588	616	557	558	538	508
jg79	56	71	65	27	35	31	19	19	34	11	19	6	4	8	2	0	1	0	0	0	0	1	2	0	1	2	0
jg80	0	3	1	1	2	1	1	1	0	1	2	1	2	3	6	7	8	13	10	7	18	35	7	5	84	79	95
jg81	65	53	37	49	52	49	22	20	38	44	72	41	55	33	41	29	48	45	13	19	11	46	45	17	61	74	66
jg82	117	129	133	51	55	36	27	13	22	33	47	23	53	43	54	42	49	35	30	44	28	24	41	26	72	75	97
jg83	42	55	36	13	19	17	1	6	1	14	24	7	19	25	38	40	37	22	35	33	36	60	63	34	126	61	66
jg84	7550	8184	7769	4051	4729	4009	1782	1967	2011	3571	4906	3177	3595	3902	4080	3028	3714	2555	3029	2907	2849	2909	3455	3662	3671	4381	3860
jg85	1098	1260	1250	881	944	715	473	429	470	897	1287	1162	1404	1261	1175	1545	1426	1005	698	982	841	876	945	813	1238	1254	1021
jg86	859	1063	1007	673	738	691	354	393	437	943	1075	1110	719	787	753	815	808	647	439	500	471	428	533	540	386	414	273
jg87	1679	2136	1824	1501	1536	1279	1008	960	1123	1725	2604	2648	1783	1791	1672	1892	1925	1496	1151	1155	1067	1053	1148	1146	932	988	686
jg89	1316	1744	1607	2887	2798	2230	1026	1224	1311	1618	2197	2062	1539	1762	1723	1615	1778	1507	2019	1598	1614	1041	1333	1542	526	593	525
jg90	2631	2836	2850	866	1102	849	583	666	648	1707	2308	1595	1554	1380	1264	1394	1660	1223	454	669	552	578	604	638	1027	986	737
jg91	41	38	38	1706	1734	1508	705	987	837	1466	992	1074	527	726	852	822	932	727	103	316	142	1086	861	212	436	495	446
jg92	492	464	507	616	617	596	182	217	229	254	390	349	281	326	292	153	210	201	107	86	87	251	224	99	235	241	154
jg93	8	1	5	772	749	599	254	231	309	646	755	669	448	556	511	655	523	670	810	692	545	1416	1457	432	996	1259	815
jg94	33	38	35	19	42	35	8	26	4	19	16	19	4	10	9	10	8	10	4	3	3	8	5	4	2	5	3
jg95	25503	29812	25881	28749	30474	25654	12537	13821	14944	34236	37173	30844	23005	24331	27030	22545	27055	22738	36476	29470	35502	24772	27796	30961	17182	16335	16555
jg96	47	37	35	2	0	7	9	6	4	14	7	43	6	8	2	7	9	6	28	15	36	23	17	39	27	22	28
jg97	0	7	3	23	14	12	12	12	6	15	19	26	24	27	21	36	26	39	243	166	181	81	164	208	109	101	142
jg98	1677	2075	1938	452	547	483	918	920	891	2000	2592	1802	1786	1470	1412	1874	1754	1336	137	291	191	479	352	239	649	616	539
jg99	84	56	96	251	207	134	105	118	100	122	204	203	252	245	221	227	257	229	564	357	393	301	386	394	279	172	205
jg100	1121	1085	1170	1774	1967	1453	543	550	665	892	1146	906	1091	1017	1194	1192	1271	1006	2787	1291	3516	1190	2006	1483	1610	1458	1345
jg101	39	28	27	25	24	12	8	2	2	12	33	20	13	30	25	6	17	25	25	5	27	23	19	16	33	35	32
jg102	3744	4720	5325	4423	3970	3643	1334	1503	1796	4124	5830	7034	5125	7404	8462	6189	10288	8025	12855	10648	16029	12731	16620	12921	18570	17981	17976
jg103	5	3	6	35	29	11	14	15	4	8	11	9	16	15	16	30	21	16	48	55	49	45	61	69	47	48	25
jg104	5	1	1	19	19	10	3	5	4	15	15	13	11	16	19	15	11	7	24	24	24	11	17	21	10	15	7
jg105	2	14	4	24	30	32	14	15	7	20	27	32	28	38	24	20	39	33	55	26	35	14	26	43	18	12	16
jg108	36	50	60	564	583	426	188	217	241	264	335	353	219	226	267	193	255	197	545	348	350	230	304	362	110	109	131
jg109	357	350	397	1259	1284	1011	625	650	730	1320	1924	2133	2322	2219	2026	2323	2633	2170	3947	2481	2827	3308	3208	2838	3929	3093	3153
jg110	12	1	11	49	44	29	8	5	14	8	18	22	12	9	23	10	15	16	24	37	34	16	24	39	16	11	16
jg112	2810	3215	2856	2014	2117	1642	835	866	995	1803	2637	2035	1759	1773	1839	1799	1967	1660	3068	1495	2748	1348	1836	1580	1309	1242	1014
jg113	29	34	30	68	71	33	7	3	5	3	10	3	1	1	5	2	5	4	12	14	14	5	12	1	3	15	20
jg114	84	115	156	270	339	177	16	22	17	35	45	71	30	27	33	32	40	45	96	63	95	38	41	21	28	38	72
jg115	22	31	20	98	156	61	5	3	3	9	11	27	5	5	6	17	18	15	26	30	18	10	9	5	13	16	31
jg116	5	3	7	0	8	2	0	0	2	1	2	2	0	2	1	1	0	0	1	0	0	1	2	0	0	2	3
jg117	7	13	23	39	38	14	4	6	4	6	8	5	7	4	7	7	3	2	12	3	2	3	14	1	10	9	5
jg118	9	18	16	62	39	34	7	1	5	6	13	5	7	3	1	6	3	4	7	6	4	15	8	8	5	6	16
jg119	21	19	38	84	90	45	12	4	6	7	14	12	10	3	5	1	9	0	13	9	9	15	14	0	6	22	22
jg120	88	140	106	7	8	4	12	7	6	55	56	2	3	2	0	6	105	2	0	0	0	27	20	0	28	0	0
jg121	16	20	17	6	5	3	3	2	3	7	12	5	4	0	1	8	1	1	0	4	1	0	0	0	2	2	0
jg122	23	35	46	108	134	77	11	5	6	10	17	1	4	3	3	8	0	3	10	6	12	5	10	3	0	10	0
jg123	9	0	2	19	31	6	2	1	0	1	0	3	0	0	1	1	1	0	1	6	2	1	1	3	3	2	0
jg125	37	36	64	94	113	60	2	1	6	22	14	22	11	14	12	6	12	13	29	10	40	7	10	15	25	9	16
jg126	1	1	4	7	5	3	3	0	0	0	0	1	0	0	1	1	0	0	0	0	0	2	2	0	0	1	0
jg127	35	17	32	146	152	80	11	9	12	15	17	10	5	4	8	3	2	10	6	13	17	15	11	2	5	3	22
jg128	27	43	47	96	120	60	11	5	5	12	7	4	18	9	5	11	15	5	27	24	12	9	12	8	17	14	25
jg129	13	22	21	5	8	7	2	5	0	5	13	1	0	0	1	3	1	0	0	0	0	5	2	0	4	1	0
jg130	5	11	5	4	3	1	1	1	0	3	16	7	5	9	3	2	2	1	0	1	2	0	0	0	8	4	2
jg131	13	16	24	69	64	17	7	4	3	4	7	4	2	5	1	5	1	5	7	4	12	5	2	3	4	5	13
jg132	2	0	1	35	62	28	5	10	18	14	5	16	12	12	14	13	4	4	13	19	19	3	11	10	4	3	2
jg133	3	11	4	216	195	156	36	52	42	59	87	109	69	55	81	45	48	43	99	61	74	33	37	78	12	17	12
jg135	24	24	30	140	146	111	51	68	52	50	71	61	56	79	62	68	72	54	96	116	89	66	52	79	39	24	37
jg136	0	0	0	0	2	0	0	0	0	0	2	0	1	3	5	4	0	1	0	1	0	3	1	0	1	0	0
jg137	51	77	85	689	712	495	157	222	180	257	290	299	247	293	279	289	328	233	689	545	589	425	557	478	187	360	188
jg142	897	1073	1012	521	490	470	172	179	234	485	545	602	514	542	608	533	579	483	370	415	367	452	519	419	545	575	486
jg143	572	585	695	276	334	221	55	70	49	94	143	157	95	113	121	80	96	92	62	53	68	44	35	53	21	22	18
jg144	958	912	1030	448	460	321	99	104	97	140	225	284	223	232	259	162	213	175	115	161	149	81	98	126	48	38	46
jg149	5664	6689	5692	1883	2003	1828	2224	2133	2960	4943	4839	4664	3643	3555	3760	4193	3984	2860	3998	2607	4966	2236	3261	3096	2086	2296	1925
jg150	423	491	425	540	528	405	127	169	145	230	441	492	389	500	414	385	444	390	648	389	593	373	444	379	398	430	381
jg151	571	703	643	931	915	702	145	219	184	374	625	372	378	535	733	387	571	510	4808	1199	6267	926	2613	1876	836	681	799
jg152	2480	3254	2739	992	1059	926	1052	967	1295	2751	3021	2680	2190	1948	2098	2673	2489	1581	1975	1577	3134	1249	1658	1752	1339	1178	1003
jg153	1747	2302	2074	694	670	661	958	940	1277	1677	1745	2013	2030	1781	1744	2611	2149	1417	2228	1845	3151	1251	2076	2052	1078	1367	904
jg154	47695	54793	50186	52198	58655	50398	26374	32134	33282	72879	74773	58472	48332	51685	52943	42864	57853	49211	61006	48718	57615	46829	52704	50392	45076	41012	38146
jg162	133	189	162	207	215	186	74	91	101	263	211	211	232	221	172	226	247	194	95	120	100	157	148	116	122	121	142
jg163	652	974	837	457	497	389	264	265	371	434	566	513	395	378	427	486	446	265	484	281	665	271	323	274	360	358	225
jg164	1410	1628	1741	1826	1840	1287	549	608	673	1085	1621	1978	2054	2117	1779	1698	1866	1756	1737	1479	1383	1633	1649	1231	1310	1270	1229
jg165	993	1127	1051	1604	1763	1385	516	565	613	1187	1672	1320	1289	1580	1792	1314	1670	1549	1932	1349	1897	1466	1736	1300	1802	1734	1389
jg166	390	409	380	719	706	578	195	238	224	453	642	386	431	444	509	459	599	580	985	676	980	703	765	852	793	765	792
jg167	39	46	38	322	308	270	57	70	67	89	128	162	88	115	112	105	151	115	248	133	163	87	102	138	48	48	46
jg168	128	145	116	143	181	120	45	50	66	98	136	147	150	172	148	153	162	180	585	242	528	173	232	313	133	133	141
jg169	1403	1492	1554	1669	1644	1555	442	499	489	1276	1673	1392	1432	1740	1572	1971	2098	1916	6170	2603	5676	1504	2390	3031	1552	1631	1681
jg170	1	5	9	2	4	1	0	1	0	0	1	2	1	5	2	7	5	1	3	0	1	2	3	6	4	2	0
jg171	221	344	301	332	324	250	123	129	154	220	242	278	276	285	291	355	385	343	467	461	366	316	455	437	321	391	259
jg172	10	14	13	42	32	24	19	17	12	16	20	20	25	20	14	25	29	26	32	31	34	23	19	37	16	18	15
jg173	1050	1309	1373	1756	1792	1349	609	693	715	762	1121	1456	1053	1238	1290	1052	1229	1067	1585	1413	1186	896	1220	1455	534	577	455
jg175	298	316	338	179	170	131	40	44	29	125	191	138	236	156	143	138	196	192	132	84	95	168	122	64	208	228	171
jg176	40	47	46	438	433	321	92	113	143	191	353	446	238	325	254	173	327	399	2691	602	1713	559	908	551	218	227	220
jg177	5	11	12	132	102	77	30	34	38	44	102	102	64	68	74	51	87	95	640	171	442	155	216	154	37	56	62
jg178	416	321	377	832	631	507	385	490	499	372	593	844	854	802	658	829	809	906	1001	848	1046	805	637	693	977	701	910
jg179	91	129	102	367	367	225	131	126	123	353	429	309	312	379	327	329	500	406	311	414	369	307	310	195	186	266	285
jg180	410	416	433	524	580	506	243	288	342	601	600	503	581	564	495	589	634	388	449	487	662	510	549	378	505	670	449
jg181	38	44	47	88	101	89	28	12	20	62	58	86	9	8	10	18	6	8	4	3	46	7	4	2	49	0	2
jg182	915	1015	900	1224	1332	1115	371	424	469	881	1150	1090	950	960	922	946	1191	1024	1218	969	1018	1149	1235	1088	1413	1498	1301
jg183	13	13	12	13	27	12	0	5	4	12	15	37	11	11	17	9	14	14	10	7	8	9	16	13	12	17	18
jg185	102	117	124	360	395	304	115	83	93	223	360	334	344	447	303	391	423	414	355	344	333	222	240	247	174	151	132
jg186	50	44	48	125	133	91	37	51	53	79	122	114	199	144	165	166	178	163	163	117	120	79	91	82	72	54	51
jg191	3	2	2	15	10	6	3	2	0	7	10	9	12	10	16	11	7	10	12	7	9	2	9	5	5	12	4
jg208	832	959	835	3017	3215	2530	800	974	961	1734	2228	1604	1935	1902	2084	1768	1851	1765	2778	1969	2432	1705	2452	1990	2441	2065	2506
jg211	19303	22151	19735	23811	25567	21604	9603	10896	12091	25591	29145	21833	18969	18793	19101	18517	22455	17367	12540	13222	11894	16617	15502	12191	18016	13109	11759
jg212	1396	1585	1430	878	945	752	424	525	450	1007	1153	852	926	828	879	829	884	836	847	663	883	579	709	662	858	841	787
jg213	13560	19768	18240	7082	6980	6423	3094	3812	3637	8187	8694	10311	7572	8511	9876	9234	8594	7460	1383	4597	2240	11911	8323	3749	17333	13937	8481
jg214	1525	1973	1439	616	772	534	225	282	321	375	522	360	434	418	416	624	761	735	468	794	448	891	692	535	1367	779	1191
jg215	499	411	455	965	1162	762	143	151	120	278	448	317	336	372	341	254	384	430	604	214	342	293	314	209	496	450	427
jg216	522	623	654	872	887	676	128	145	134	275	377	372	442	529	627	495	607	678	1613	600	1376	659	830	596	1072	1001	994
jg217	302	245	224	633	697	542	134	189	164	221	284	295	274	234	351	276	414	333	405	286	299	355	453	411	580	658	627
jg218	572	639	662	1039	1042	941	330	435	421	636	756	791	588	655	691	554	678	545	857	535	784	640	773	789	439	506	359
jg219	28	39	30	32	39	34	26	19	15	35	56	50	50	43	46	47	52	50	65	43	85	38	54	49	53	35	43
jg220	495	636	568	593	616	415	209	231	263	377	499	558	686	635	549	648	582	524	861	653	757	741	715	599	680	924	802
jg221	1043	1495	1311	404	390	320	220	274	294	544	478	336	178	160	207	218	212	141	96	110	141	73	99	100	126	114	107
jg222	138	113	136	145	129	100	44	39	67	96	141	158	203	176	232	206	256	160	223	167	179	254	220	167	135	226	211
jg223	13	17	12	21	14	21	4	4	7	6	4	36	6	27	21	10	13	15	22	9	14	3	5	11	7	13	26
jg224	544	703	768	493	393	413	136	170	185	463	792	1188	496	1185	1179	946	2048	1174	637	634	773	770	806	975	890	1037	909
jg225	22	22	14	18	13	10	2	3	13	2	6	15	4	11	12	2	3	2	6	0	7	0	1	0	9	0	5
jg226	241	241	265	152	117	90	113	88	140	210	288	270	340	347	260	357	296	287	214	385	337	376	444	284	481	592	412
jg227	402	423	447	595	649	483	179	215	215	277	453	433	371	433	422	373	436	427	741	459	558	341	486	512	359	432	396
jg228	841	819	803	1191	1181	1002	334	395	413	1024	1587	1480	1493	1501	1239	1374	1797	1521	1470	895	991	1099	974	812	1258	924	1047
jg229	2311	2961	2523	1085	1175	959	1271	1128	1538	1957	2308	1925	1513	1271	1133	1614	1560	951	871	899	1139	677	807	737	842	898	647
jg230	364	340	431	1269	1419	1154	337	482	462	629	793	735	462	502	534	320	338	601	470	389	499	379	403	290	465	831	605
jg231	544	526	488	698	857	598	190	239	245	422	693	520	476	566	494	401	532	559	581	470	673	412	460	406	394	525	475
jg232	7	14	12	172	178	153	18	40	39	38	25	61	36	40	63	20	39	23	17	16	14	20	35	10	7	11	11
jg233	4626	4647	5162	3430	3464	2848	1285	1488	1589	3028	4076	2802	2694	2788	3090	2491	3026	2530	2594	2753	2257	2879	3520	3626	4188	4353	4888
jg234	920	977	1231	931	943	827	278	349	314	433	863	604	576	590	545	488	638	539	541	301	332	359	406	221	392	342	348
jg235	165	167	147	129	112	94	90	113	131	134	148	148	126	94	80	96	113	81	73	84	82	72	149	81	75	157	100
jg236	229	260	257	74	77	70	84	76	101	231	263	175	217	187	158	178	158	178	92	118	104	104	110	109	132	149	181
jg237	14	8	24	31	25	29	7	8	19	27	21	19	14	32	22	20	13	32	50	25	36	30	31	33	85	41	111
jg238	1286	1808	1170	3409	3399	2786	838	931	808	1862	2689	2438	2996	3177	2791	3173	3909	3324	4011	2825	3002	4286	3777	2385	4523	3168	4035
jg239	33	42	33	33	45	31	9	15	18	16	20	37	17	20	12	14	14	15	19	14	10	10	9	6	10	6	24
jg240	1	5	6	11	2	2	0	2	2	0	2	3	3	3	2	1	4	1	0	7	0	3	0	0	0	2	0
jg241	1965	2283	2158	811	857	703	605	614	746	1467	1735	1530	1332	1091	1055	1303	1456	1118	768	594	689	720	785	689	936	864	776
jg242	1446	1651	1477	773	857	754	373	354	386	848	1035	922	1090	1039	1022	1068	980	614	942	476	633	673	682	616	580	445	560
jg243	3555	4128	3753	4226	4707	3860	1657	1825	2164	3871	4487	3493	3304	2783	3051	3129	3534	2486	2217	2221	2158	2489	2519	2183	3245	2449	2233
jg244	1547	2047	1682	614	619	531	270	298	265	685	1088	909	1014	948	815	813	1126	881	258	372	229	391	349	268	536	489	474
jg245	2159	2578	2322	1379	1393	1173	729	677	851	1648	2102	1941	1695	1565	1582	1670	1816	1310	3360	1654	4143	1180	2137	1933	1103	1138	831
jg246	9774	12075	10691	19833	21648	18156	5697	5885	7331	14018	13678	12743	10668	10697	14124	13112	13113	10468	35779	19062	33865	19491	26462	23641	11848	11888	13273
jg247	62	65	62	33	41	22	22	14	21	42	40	81	58	45	34	45	17	33	29	17	26	24	20	18	37	31	30
jg248	1009	1109	1028	886	900	781	232	258	268	610	879	624	549	585	546	444	678	541	1015	424	641	447	575	476	517	477	512
jg249	14	17	27	18	18	9	1	3	1	12	10	21	17	15	5	5	10	12	27	11	14	7	6	12	5	8	11
jg250	923	686	772	1663	1674	1265	336	377	380	674	1173	890	818	928	988	622	1032	970	3381	1532	2175	911	1231	1157	776	1007	812
jg251	3692	4826	4101	421	578	465	891	881	1115	2440	2679	2011	1874	1655	1472	1903	1889	1320	221	691	476	570	524	621	958	952	668
jg252	641	805	724	694	747	577	280	280	283	590	533	643	486	475	646	811	678	305	87	209	114	509	374	85	412	327	272
jg253	2078	2594	2385	2802	3223	2670	911	1026	1055	3300	3827	2452	3169	3235	2965	2547	3673	2840	2405	2138	2331	2147	2364	1688	2607	2315	2701
jg254	1019	1164	1106	1943	2114	1672	477	583	619	1065	1285	1035	998	1073	1087	853	1051	904	1350	1079	1171	770	1025	1197	676	685	571
jg255	241	218	263	280	318	215	111	106	120	257	305	133	222	243	178	201	227	210	252	190	249	191	222	210	270	258	279
jg256	69	68	61	331	355	293	88	125	94	129	185	175	168	179	165	143	198	177	238	214	217	214	290	234	235	179	174
jg257	530	640	645	418	388	367	177	174	153	436	549	372	341	356	346	392	544	350	701	308	973	322	723	336	405	348	315
jg258	1253	1320	1322	320	405	263	124	133	141	359	464	308	368	313	290	234	243	283	195	113	107	126	87	102	107	101	114
jg259	71	88	76	44	57	45	3	13	5	26	25	16	19	25	30	12	27	32	21	27	13	9	11	19	10	22	9
jg260	1	0	2	1	0	0	1	1	0	1	1	1	0	3	0	3	2	0	3	0	0	0	0	0	0	0	0
jg262	850	704	815	3212	3253	2949	1177	1481	1071	3232	2693	2569	2654	2696	3231	1903	2598	2199	2751	2250	2024	4603	5361	1750	3355	2580	2770
jg263	14	27	19	68	77	59	10	21	15	47	33	48	20	21	43	31	35	27	137	39	45	16	19	35	5	10	7
jg264	689	886	755	107	110	112	205	177	157	403	567	426	454	357	226	445	442	266	45	106	55	111	111	59	235	226	114
jg265	1209	1404	1192	147	159	90	62	58	40	183	507	276	382	233	161	281	334	283	36	41	31	107	101	27	350	296	144
jg266	0	3	0	14	21	14	2	0	5	19	14	5	13	26	13	11	24	23	16	7	20	14	7	17	9	7	9
jg267	7	6	5	21	24	24	9	19	14	53	51	59	128	95	53	116	136	80	40	38	38	55	84	64	119	139	94
jg268	1432	1628	1453	817	952	692	372	383	436	858	1322	1103	1007	997	998	1015	1384	1151	1272	606	899	705	995	635	742	653	782
jg269	20	12	9	89	50	73	19	40	44	68	90	95	89	93	51	57	101	60	109	87	76	72	117	90	65	47	85
jg270	0	0	0	1	0	0	0	0	0	0	2	1	0	0	0	0	0	0	1	0	0	0	0	0	0	0	1
jg273	12	7	12	49	62	50	19	40	28	50	71	70	33	41	37	30	35	31	79	49	49	39	58	44	39	47	32
jg275	1764	1935	1764	5173	5432	4502	1196	1494	1634	3186	3743	3626	2524	3015	2831	2363	3167	3038	6312	3030	4106	2785	3090	3126	1639	1780	1433
jg276	386	462	440	478	530	512	181	188	223	650	1092	553	1033	912	624	695	1009	1159	926	396	567	925	776	244	251	94	150
jg277	9478	11537	8108	2066	2614	1856	609	705	691	1891	1577	1583	1449	1182	1344	994	1069	833	221	331	155	507	206	249	737	336	401
jg278	86	87	71	245	313	212	76	89	78	107	152	147	82	155	129	91	92	99	145	124	135	50	77	85	33	32	39
jg279	1310	1480	1214	1653	1684	1313	556	604	635	1429	1708	1905	1890	1849	1677	1477	1810	1449	709	709	595	769	702	575	1059	891	741
jg280	741	799	868	942	982	859	489	544	629	1122	1282	1221	1269	1266	1187	1524	1628	1537	1450	1737	1240	2031	2202	1398	2957	2594	2284
jg281	265	326	297	3810	3854	2900	992	1261	1219	1497	1566	1786	1483	1569	1740	1475	1595	1477	3216	2657	2681	1775	2492	3087	1192	1026	1104
jg283	286	278	242	371	343	307	167	222	241	347	503	400	428	464	382	556	630	488	534	430	382	612	648	412	592	558	479
jg284	2080	2150	2210	2925	2931	2390	765	938	858	1739	2590	2719	2017	2115	2294	1995	2467	2271	2569	1674	1896	1556	1758	1593	1741	1346	1305
jg285	3	0	0	0	0	0	0	0	0	0	0	0	0	0	0	0	0	0	5	1	2	0	1	1	0	1	0
jg286	37818	43248	40331	38069	43150	37212	17717	20933	21990	51682	51609	38222	33772	35338	37235	29360	38799	31289	41333	32113	40168	29094	32921	32942	27761	28304	24428
jg289	372	360	321	302	282	223	64	111	98	163	213	176	190	226	248	158	267	268	1958	482	1912	395	577	730	228	228	454
jg290	233	196	208	226	296	196	73	82	100	241	370	329	419	451	365	234	365	329	215	140	174	110	142	66	155	87	98
jg291	81	58	63	647	700	519	169	199	233	272	291	304	243	282	218	201	303	222	353	275	379	195	288	287	187	115	153
jg292	1035	1255	891	6763	7794	6285	2109	2296	2503	4892	4684	4204	2328	2577	1773	1741	1825	1500	1617	1033	947	1134	1367	559	761	848	554
jg293	323	324	351	2650	2801	2293	634	781	848	1069	1251	1290	957	1031	1167	928	1121	960	1675	1163	1431	740	1056	1296	578	452	423
jg299	5	8	2	58	63	60	12	36	19	24	31	34	28	43	17	30	32	30	46	30	34	21	31	22	9	12	12
jg301	86	83	109	591	838	645	144	173	124	277	267	244	155	132	142	76	113	130	60	127	103	107	132	135	86	55	71
jg302	5	6	13	22	26	35	1	3	5	8	1	11	5	7	8	10	9	15	1	10	10	11	9	3	35	16	48
jg303	1325	1605	1411	182	190	160	235	184	240	583	1152	813	755	639	430	812	957	651	35	94	35	202	135	57	448	315	208
jg304	212	330	288	316	272	224	136	111	119	207	314	261	249	244	271	228	246	176	312	155	254	181	200	225	146	150	142
jg305	48	37	58	22	19	15	4	0	15	4	10	22	5	4	6	0	6	4	10	2	5	2	2	2	0	7	4
jg306	76	59	69	148	172	135	67	70	90	179	170	187	187	242	354	204	233	220	253	199	371	296	433	264	641	624	545
jg307	3204	3439	3182	5518	6040	4480	1572	1838	1855	3744	3831	3015	2605	2446	2758	2187	2522	1990	1359	1709	1240	1473	1400	1691	1212	883	1065
jg308	66	72	67	422	482	288	78	89	95	123	207	172	122	156	140	108	135	113	263	246	229	138	170	206	95	105	73
jg310	0	0	0	0	0	0	0	0	0	0	0	0	0	0	0	0	0	1	0	0	0	0	0	1	0	0	0
jg311	5117	5764	5690	3660	4173	3293	2210	2363	2778	4920	6032	4870	5401	4829	4924	5983	6036	4279	2579	3119	3073	3691	3694	3177	4773	4235	3971
jg312	2	4	1	0	5	0	0	3	1	2	4	3	14	6	5	21	20	14	8	14	9	14	18	9	26	30	30
jg313	1223	1444	1389	1257	1221	996	404	452	474	756	997	998	1265	1242	889	1285	1585	1180	951	1019	780	910	1033	846	1123	973	1141
jg314	18	33	35	1679	1491	1372	2296	2278	2559	5309	5402	5261	3958	4109	3679	3064	3521	2144	479	305	125	571	650	644	493	1263	481
jg315	2162	2321	2120	2544	2581	2271	915	1050	1051	1831	2226	1862	2056	1983	2031	1869	2230	1950	1622	1499	1520	1332	1412	1430	1582	1388	1338
jg316	13	4	12	22	5	7	3	11	8	10	12	14	14	12	9	22	23	13	8	10	0	5	8	6	12	12	2
jg318	204	230	211	560	596	438	226	295	306	341	500	497	530	559	461	548	623	496	859	693	659	384	622	633	301	335	268
jg319	75	70	69	198	193	140	65	53	87	95	108	158	127	193	123	129	174	146	221	178	207	126	152	170	66	65	55
jg322	1162	1343	1410	1816	1861	1547	619	696	813	1401	1894	1721	1421	1633	1643	1530	1975	1595	2869	1861	1791	1856	1935	2049	1243	1216	1260
jg323	64	76	60	535	531	417	117	152	145	235	246	163	121	149	206	92	144	134	392	333	440	171	254	267	88	88	89
jg324	839	1178	1133	854	959	700	308	364	342	534	830	899	730	825	838	648	839	731	915	682	777	586	776	759	715	578	713
jg325	3674	3817	3733	5086	5839	5091	1848	2134	2145	4614	5697	3872	3663	3387	3469	3509	4203	2781	2296	2332	2402	2236	2213	2110	3253	2365	2134
jg326	262	312	310	393	358	251	108	137	117	200	273	301	232	277	264	244	358	298	245	180	233	184	197	167	194	194	166
jg327	3662	4182	4319	5090	5156	4270	1282	1613	1449	2677	3721	4131	2870	3504	3574	3044	4138	3993	3320	2925	3090	2794	3384	2860	3473	3171	3188
jg328	13	6	17	12	4	10	6	8	3	3	16	34	25	15	55	27	17	65	2	6	6	9	5	11	6	33	18
jg329	28	38	25	12	20	12	9	12	14	16	32	83	18	21	197	65	67	159	6	22	6	17	35	18	10	84	45
jg330	47	44	49	246	213	151	75	119	101	139	137	151	107	102	116	80	89	70	145	82	94	53	75	97	42	47	38
jg331	88	99	71	390	462	333	158	189	220	240	308	279	229	232	250	157	199	167	278	203	202	115	160	215	73	79	89
jg333	661	824	777	177	188	190	270	264	393	641	771	642	500	451	356	564	475	350	101	153	128	161	140	106	116	105	68
jg334	3	1	1	10	7	19	2	4	4	9	3	13	8	8	17	48	52	27	1228	698	1033	134	280	1286	5940	727	3296
jg336	6	8	5	5	6	5	1	2	2	2	9	4	6	14	5	6	5	10	4	4	5	6	11	9	14	12	10
jg337	0	0	0	0	0	0	0	0	0	0	2	0	0	0	0	0	0	0	0	0	0	0	0	0	0	0	0
jg339	4055	4842	4877	3241	3355	2916	1944	2145	2388	3024	3780	4502	4217	3836	3760	4511	4371	3490	2895	2757	3139	3015	3610	2788	3691	3958	3507
jg340	252	268	257	355	374	325	134	155	172	310	305	461	542	627	690	768	992	1138	1455	1550	1621	2010	2011	1361	4214	2991	3647
jg341	1536	1993	1773	822	956	758	769	744	1038	1467	1489	1268	1024	960	1105	1097	1028	647	1359	981	1699	722	1172	992	792	823	780
jg342	181	174	179	129	143	145	56	54	86	132	218	149	150	113	123	137	126	131	87	88	157	86	131	75	141	143	115
jg343	2	8	3	22	57	18	15	4	27	51	40	36	38	2119	5632	448	1884	132	688	1741	1242	997	1509	1403	1541	645	670
jg345	316	353	308	277	289	246	179	164	174	387	513	443	493	458	430	406	448	386	120	253	125	217	214	212	336	399	313
jg346	323	453	414	270	308	266	172	148	274	418	468	395	358	331	322	381	403	307	249	343	441	297	422	310	257	388	251
jg347	21	26	17	100	135	94	25	38	54	63	73	90	53	79	34	55	48	52	70	48	70	35	59	49	59	52	24
jg352	104	86	68	195	168	153	35	59	72	77	150	88	116	98	127	104	102	78	47	66	68	122	56	69	92	70	76
jg354	908	1032	905	158	185	152	168	190	190	463	970	508	522	411	357	516	576	402	26	70	20	74	56	44	190	169	127
jg355	1267	1474	1734	408	588	479	353	297	443	450	519	362	126	117	92	41	65	65	38	67	33	64	66	148	168	107	91
jg356	88	103	130	44	77	69	66	63	103	88	116	152	93	78	112	74	66	78	132	61	95	45	65	73	74	32	37
jg357	2770	3450	2828	4677	5232	3896	1462	1679	1864	2773	3499	2805	2569	2450	2570	2332	2663	2212	1787	2094	1940	2005	2286	1997	2247	2567	2143
jg358	1279	1017	1016	2629	2490	2484	784	949	1132	1983	1814	2153	2066	2064	2544	2222	2694	1794	4090	3453	4707	4056	4350	3332	1818	1810	1465
jg359	0	1	1	45	53	31	20	29	10	29	51	32	19	69	46	45	56	64	122	149	141	148	196	116	112	135	117
jg360	63	59	66	25	21	16	1	6	2	13	8	1	5	8	3	7	9	5	9	4	6	8	31	7	43	54	38
jg361	80	62	89	5981	6061	5117	1528	1967	2017	3550	3453	4226	8257	7830	8983	8678	10172	8265	13524	11238	9482	8496	10363	12359	14787	8926	13083
jg362	6262	9124	6894	3207	3093	2495	1583	1738	1801	3208	3755	3606	2646	2568	2320	2422	2599	2355	2811	1812	3347	2264	3922	1890	3540	3136	2547
jg363	492	671	522	559	543	471	299	304	350	564	860	812	710	775	694	801	866	747	923	510	936	543	640	493	649	687	443
jg364	9	5	8	15	18	17	11	7	11	27	34	27	78	216	311	115	148	111	204	158	314	199	184	131	267	311	293
jg365	306	312	313	344	409	330	116	123	125	295	363	272	363	290	225	345	323	349	516	324	362	358	405	277	396	418	368
jg366	253	328	315	233	274	184	105	108	136	179	303	194	197	194	191	217	230	239	238	164	138	175	194	163	170	156	145
jg367	8	7	13	43	45	34	14	11	7	14	11	39	9	5	8	12	28	8	14	12	15	12	11	5	7	7	8
jg368	1442	1694	1550	1696	1837	1499	831	854	1108	1994	1939	1714	1417	1348	1474	1836	1659	1321	819	1132	713	1320	1363	924	1235	1436	1137
jg369	504	751	656	262	264	241	260	204	334	534	524	434	380	316	401	410	340	278	450	314	599	268	439	382	308	346	262
jg370	196	120	182	274	268	197	27	40	37	67	196	63	64	79	69	97	100	106	225	122	152	111	170	56	205	163	187
jg371	12	18	11	23	25	10	12	4	11	11	19	24	8	14	15	18	11	9	5	16	14	20	12	12	21	19	9
jg372	127	131	131	243	244	215	85	90	65	123	249	164	149	169	150	222	161	259	152	327	219	211	169	229	122	208	128
jg373	1961	2397	2086	1895	1883	1635	1024	1062	1229	1702	2238	1859	1967	1868	1922	2368	2243	1833	1719	1890	1981	2172	2158	2271	2477	2338	2322
jg374	635	723	821	898	823	568	203	266	206	446	772	650	898	768	719	719	898	847	1009	558	1006	1147	959	563	1344	1345	1100
jg375	1228	1552	1409	590	639	527	594	568	638	1672	1805	1412	1615	1278	1072	1419	1363	954	108	278	188	246	188	212	476	407	332
jg376	7821	10152	7682	1802	2035	1723	4643	4188	4813	12826	12866	13073	12565	9872	7352	11160	11089	6171	297	1427	743	1311	971	691	1424	1529	1146
jg377	43	68	45	64	77	72	59	64	67	105	137	144	140	175	147	171	137	116	93	142	136	763	432	179	745	770	505
jg378	14	10	16	53	74	46	46	52	66	216	194	188	211	244	204	160	147	161	107	315	137	2011	939	205	1766	2127	1007
jg379	966	1224	1067	1183	1183	1040	799	756	957	1657	1679	1995	1720	1583	1567	1912	1900	1732	1628	1580	1589	1845	2245	1770	1734	1692	1386
jg381	569	567	558	2585	2568	2084	675	858	810	1239	1445	1724	1166	1249	1307	1008	1399	1273	1664	1451	1488	1151	1543	1594	1459	1341	1325
jg382	1054	1047	999	983	978	910	199	289	275	438	965	782	887	1067	785	837	1332	1223	963	884	1051	972	1182	722	1623	1334	1049
jg383	1315	1138	1198	2107	2265	1716	110	109	98	184	722	475	392	461	515	231	512	655	2477	244	1316	1117	898	428	1746	683	1827
jg384	554	616	668	314	376	344	403	405	539	680	849	559	497	443	536	377	497	360	198	365	206	271	494	180	117	367	85
jg385	542	605	569	84	97	82	84	80	78	182	298	219	196	176	118	202	227	195	19	94	21	135	78	38	176	170	82
jg386	656	836	780	702	730	613	281	336	397	594	723	824	740	824	774	833	958	805	1010	739	836	837	1003	847	884	937	882
jg387	0	1	4	19	14	23	7	18	8	29	61	78	78	389	656	127	336	162	264	372	347	336	532	363	771	505	514
jg388	1	0	3	14	29	30	22	15	29	79	121	82	124	869	1646	335	754	283	554	872	636	704	1177	746	1205	837	726
jg389	108	137	104	139	124	94	56	57	65	101	124	142	139	132	147	113	130	120	288	107	264	136	168	107	107	106	105
jg390	6411	5570	4610	5165	5562	6337	2055	2050	1843	7070	8945	10943	18149	12941	13729	10168	10818	10738	156	176	198	2036	733	84	1070	420	550
jg391	1107	1128	934	657	709	694	527	587	710	1515	1144	782	770	946	831	2599	2589	1796	1518	1714	1590	620	630	1766	1621	1276	1192
jg392	2962	3061	2764	4367	4792	3859	1513	1609	1488	5338	6105	5206	10270	10147	7034	14137	16382	13304	6423	5071	5063	12266	10023	4567	17795	6694	14614
jg393	3649	3804	3570	2536	2687	2131	1294	1309	1309	4503	6703	5734	10902	11809	8868	15962	18023	15995	6623	4734	4195	13973	8306	4294	19908	9923	13575
jg394	95	113	72	33	31	38	12	27	16	8	16	20	10	11	12	16	7	21	11	16	20	10	9	9	7	6	49
jg395	0	0	2	1	8	1	3	1	1	3	3	4	0	1	1	1	3	3	0	1	0	1	1	2	2	2	10
jg396	0	0	0	2	1	1	2	4	0	1	1	0	0	0	0	0	0	1	0	0	2	0	4	5	0	0	1
jg397	5707	5325	5500	6267	6164	5379	1235	1348	1468	3506	5310	6949	3846	4245	4023	4557	6378	5660	20400	4771	15217	6374	7583	5120	4773	4575	5133
jg398	7021	6604	6612	7498	7457	6455	1464	1516	1617	4217	6679	8357	4570	5019	5183	5341	7783	6580	23406	5706	17691	7136	8644	5643	5630	5260	5897
jg400	0	0	0	0	0	0	0	0	0	1	2	0	1	0	1	0	5	2	0	0	0	0	2	0	0	0	0
jg401	491	554	549	827	881	760	467	550	666	1019	966	803	1133	1295	1667	1136	1327	947	937	999	1007	986	1119	940	1112	1318	1129
jg402	29	41	50	31	41	55	22	20	8	15	24	28	51	57	53	44	66	67	75	77	54	64	62	54	71	75	88
jg403	51	62	49	59	70	42	10	16	21	69	66	66	84	93	87	102	228	155	158	112	172	175	167	164	140	183	168
jg405	1722	2348	1976	1997	2057	1607	790	799	944	1870	1683	1439	1496	1238	1257	1440	1462	1078	1081	1125	1245	999	1136	1055	1375	1104	1058
jg406	621	616	574	594	536	523	139	170	176	265	296	358	225	272	313	205	282	228	312	288	251	282	329	371	262	252	254
jg407	198	172	209	86	77	58	27	35	34	85	141	57	103	90	78	99	123	87	77	105	101	140	229	200	288	157	226
jg408	0	7	4	8	14	10	2	6	3	2	2	9	2	10	10	2	3	0	21	17	18	21	3	12	19	2	1
jg414	5151	6600	5638	9096	10060	8321	4275	4370	4766	9873	13133	12413	9544	8568	8717	10360	9914	7450	9760	5931	9485	7124	8228	6902	5388	5152	4706
jg415	319	392	342	2202	2310	1927	548	647	767	1112	1147	959	746	850	819	643	806	777	1053	981	951	581	688	941	429	290	359
jg416	5015	5838	4645	10282	10845	9128	4298	4462	4630	9857	14688	14611	10309	9826	8902	10725	11464	9044	11534	6762	11083	8562	9602	7724	5953	5828	5079
jg417	1	1	1	9	7	2	1	3	0	1	3	0	1	1	2	2	0	5	15	6	11	2	34	4	22	17	8
jg418	42	62	57	71	91	56	43	19	25	52	73	88	100	101	54	60	110	44	34	54	52	39	43	28	109	92	88
jg419	346	334	287	207	187	153	137	149	140	137	237	257	408	342	264	386	426	373	324	259	241	369	373	272	825	518	595
jg421	512	461	607	5824	5651	4079	1664	2139	2086	1747	2223	2915	2012	2094	2159	1736	1766	1820	4207	3206	3310	2050	3147	3582	1173	1279	1064
jg422	1213	1420	1176	2140	2016	1750	788	771	951	1759	2097	2178	2093	2043	1760	2039	2407	1756	940	1076	903	1100	1071	1014	927	958	834
jg425	266	265	235	335	382	359	180	213	262	322	374	328	226	160	177	220	201	180	229	165	203	154	160	114	132	180	142
jg426	18	29	25	149	119	124	43	40	68	118	134	93	92	122	84	106	124	85	103	111	91	79	103	109	73	46	51
jg427	126	144	127	860	963	749	282	373	398	319	372	522	308	334	342	305	335	260	208	154	159	187	231	176	350	334	329
jg428	659	842	817	411	455	385	232	243	337	668	705	392	470	328	393	432	407	321	1022	501	1126	314	485	540	309	355	314
jg429	144	159	159	100	106	104	78	79	90	191	169	184	146	121	131	110	150	92	203	116	226	68	109	83	118	68	73
jg431	231	252	287	665	682	552	230	253	301	458	633	598	594	759	609	601	757	620	430	331	304	326	326	296	283	262	226
jg432	7	5	4	8	9	4	0	5	3	1	5	27	5	148	538	28	213	14	48	216	151	77	157	207	119	189	108
jg433	53	84	73	120	118	93	30	14	34	26	80	43	60	51	53	47	67	62	119	59	85	72	68	40	55	51	65
jg434	1659	1373	1166	1678	2808	2409	745	726	923	2486	3662	2936	2969	3116	2531	2333	2975	2858	1755	1451	1307	1590	1346	1180	873	595	652
jg435	1	1	0	19	1	5	0	4	0	10	7	4	3	2	2	3	5	1	17	14	9	10	14	3	6	5	14
jg436	4	2	6	753	737	576	237	324	298	396	428	377	198	189	243	156	222	145	67	125	131	72	85	42	22	7	20
jg437	59	51	50	229	260	209	54	50	73	93	112	109	64	77	64	60	88	68	112	78	81	56	100	101	27	45	27
jg438	199	205	195	1343	1342	1055	253	347	374	470	512	572	401	432	444	410	416	385	631	523	503	299	486	541	211	211	187
jg440	38	34	35	266	237	212	72	83	83	66	141	134	121	93	101	74	81	78	167	110	101	70	120	133	49	42	36
jg441	7	3	6	505	586	395	269	319	318	1316	1637	1127	2332	2224	2159	2684	2921	2078	1350	1179	783	2375	1772	1415	5472	5166	6976
jg443	356	385	358	342	299	251	119	124	179	310	462	305	513	466	353	431	428	391	349	337	250	305	353	338	214	204	173
jg447	93	88	84	105	74	93	48	55	61	69	102	133	97	103	93	95	130	82	122	62	73	70	97	83	59	50	55
jg448	2133	2472	2383	2917	2849	2466	1071	1233	1309	1991	2634	3211	2443	2396	2378	2593	2688	2341	2810	2342	2403	2099	2503	2598	1853	1583	1819
jg449	455	515	537	602	683	587	376	386	495	1062	1148	857	832	768	708	958	967	775	468	714	434	708	681	544	921	1019	742
jg450	5737	7551	6652	3666	3889	3444	3440	3294	3798	8066	9073	8750	7570	7081	6550	9385	8633	6519	5640	5149	9353	4665	5781	5095	5039	5339	4340
jg451	4	2	2	19	25	10	7	10	4	20	23	9	16	11	10	12	16	11	36	24	26	32	27	34	29	29	26
jg452	4534	4068	3766	1453	1586	1286	755	684	688	2194	2989	3528	4802	4543	3565	5834	6409	5091	108	1504	280	2147	1267	629	2219	1344	1593
jg453	138	160	142	116	95	75	18	30	53	88	60	52	79	89	73	72	65	60	60	66	66	32	39	66	57	40	41
jg454	863	1041	930	1101	1237	1002	366	458	442	778	1144	960	1189	1166	989	1088	1304	1018	2555	1386	2664	1160	1459	1520	1016	1016	843
jg455	1983	2287	1802	2744	2731	2440	1799	2049	2290	3294	4524	3821	3161	3354	2972	3872	3826	3023	3082	3133	2900	3098	3035	3153	1828	1580	1437
jg457	692	723	838	2283	1974	1635	804	832	859	889	1286	1306	1031	1086	1015	940	1069	939	1003	904	932	694	868	900	511	406	387
jg458	1915	2170	1950	538	634	514	451	414	437	1095	1487	1211	852	863	770	855	1019	777	970	600	1147	515	582	688	508	545	495
jg459	342	316	356	673	665	445	84	97	96	193	352	297	289	293	313	258	364	274	559	263	464	243	330	248	291	278	261
jg460	4186	4990	4412	1278	1455	1270	1017	965	1067	2238	2879	2565	2081	1992	1797	1759	2205	1613	1055	918	894	990	1170	839	937	824	676
jg461	431	513	508	677	731	566	174	193	233	365	608	436	411	439	401	355	456	474	554	293	389	313	357	339	348	354	343
jg462	12	9	15	76	70	55	32	29	34	135	138	60	127	106	120	146	155	150	98	63	51	75	53	27	13	20	7
jg463	3523	3836	3529	1482	1446	1248	601	639	667	1263	2046	1641	1689	1644	1336	1223	1760	1404	358	550	342	478	455	299	702	492	496
jg464	418	435	427	553	650	506	209	201	225	367	630	434	347	391	416	280	375	314	228	293	315	273	285	245	287	336	276
jg465	0	0	0	1	2	0	3	0	0	0	0	0	0	0	0	0	0	0	0	1	1	0	0	0	2	0	0
jg466	0	1	0	0	1	0	5	5	10	11	16	20	14	15	12	23	27	24	12	10	14	30	15	14	58	21	18
jg467	166	170	195	200	197	141	105	105	105	167	236	140	160	163	145	137	169	141	243	147	193	151	165	154	149	113	120
jg468	89	49	95	386	294	172	221	289	269	166	270	301	290	364	339	359	435	379	667	582	605	318	379	485	276	252	229
jg469	555	687	617	426	474	333	170	194	200	256	503	368	333	319	300	285	433	356	572	226	471	300	315	267	331	329	302
jg470	10	22	13	204	154	145	48	65	71	66	68	85	49	55	68	50	46	40	126	112	141	62	123	138	71	117	102
jg471	65	44	65	408	424	370	125	162	162	198	218	186	178	154	173	113	141	137	216	152	180	94	112	126	70	42	50
jg472	3	2	12	115	129	82	27	28	42	52	49	28	30	22	21	14	24	23	83	60	80	52	99	83	55	60	55
jg473	6366	7264	6897	3134	3203	2605	1753	2030	2178	3856	5492	4332	4098	3821	3503	3841	4137	3314	2130	2582	2174	1998	2410	2153	2124	2162	1782
jg474	2644	3338	2826	738	830	691	780	723	943	1770	2020	1505	1511	1238	1188	1374	1360	988	1025	829	1379	590	682	970	883	827	732
jg475	830	1015	949	752	790	689	398	377	459	866	1060	794	891	864	807	900	826	742	1045	745	994	794	873	802	975	1051	867
jg476	289	382	388	1053	1086	769	171	207	195	444	619	586	506	511	410	627	590	583	931	554	602	1185	1105	548	1199	1127	1010
jg477	11	6	8	45	50	30	7	6	8	14	16	23	14	22	21	38	27	44	49	31	28	78	60	26	69	67	46
jg478	2373	2627	2612	2537	2337	2037	759	883	910	1279	1854	2119	1401	1440	1255	1247	1617	1608	3133	1936	2572	1467	1814	2006	1269	1188	1064
jg479	925	1112	1074	835	733	602	365	365	470	414	790	904	604	587	581	505	621	550	1211	635	1088	444	572	639	342	443	340
jg480	3	7	3	9	12	14	17	14	13	28	44	42	89	68	70	74	77	75	55	86	39	151	169	166	134	101	139
jg481	26	35	28	63	56	46	29	18	20	45	26	50	47	50	81	88	65	63	90	45	89	60	53	51	59	70	45
jg482	314	303	358	636	624	492	207	179	187	388	484	465	456	476	517	485	556	487	811	610	761	495	497	563	591	509	456
jg483	212	224	229	487	567	394	164	166	185	311	317	323	300	341	419	310	360	302	533	418	476	329	328	414	369	342	346
jg484	8	5	6	16	17	16	11	4	9	9	15	22	32	22	12	16	33	20	5	2	6	12	10	9	14	6	8
jg485	2598	2917	2711	1153	1125	1043	366	397	415	988	1314	1266	1036	1082	945	904	1137	884	516	453	441	357	353	390	511	324	399
jg486	211	239	213	203	216	138	84	88	89	167	215	194	214	208	147	167	219	169	76	123	62	82	68	107	101	58	75
jg487	3042	3526	3870	2311	2419	1817	666	893	988	1722	2200	2499	2127	2371	2740	4064	3400	2488	4308	1670	2864	2276	3276	2066	3749	3770	4096
jg488	1052	1112	1061	1108	1039	869	509	478	544	745	1068	1055	1127	1068	994	942	1164	908	899	729	751	1032	1080	631	1095	805	1200
jg489	370	428	401	217	281	227	194	196	204	336	353	260	297	258	222	243	271	218	129	171	141	99	126	174	147	136	113
jg490	727	693	872	1413	1465	1024	339	485	397	456	784	910	631	709	743	560	860	808	1611	810	1147	777	811	843	585	519	549
jg491	125	185	186	152	150	132	41	63	67	112	159	176	141	149	126	154	188	151	193	169	151	119	147	134	131	133	113
jg492	13	13	19	10	19	11	1	5	7	14	11	19	14	15	14	23	18	25	15	17	11	17	24	12	19	10	8
jg493	559	617	626	562	664	517	227	213	240	411	556	745	622	538	606	632	666	608	627	482	537	407	542	444	444	403	394
jg494	1213	1287	1349	1391	1345	1091	391	491	439	711	1065	1107	785	799	828	649	888	730	396	549	560	299	367	357	459	391	312
jg495	1232	1339	1298	1108	1174	860	337	353	401	564	713	779	639	739	785	645	785	625	863	681	823	606	619	770	588	505	524
jg496	5292	5451	4930	110	127	92	13	31	27	57	47	75	43	48	57	36	75	47	62	59	109	34	22	38	43	39	61
jg497	854	971	819	67	63	47	50	83	102	210	262	213	192	199	186	219	253	183	148	526	455	418	624	755	500	604	375
jg498	2	0	1	1	3	4	0	3	4	0	4	4	0	9	9	4	6	7	13	5	0	7	6	549	5457	4969	2719
jg499	1	0	0	0	1	3	0	0	0	2	0	2	0	1	0	1	0	3	3	0	1	6	1	106	1286	1104	633
jg500	1282	1561	1429	545	638	531	475	529	638	1007	1081	1105	944	813	861	1067	888	660	1061	697	1448	523	861	705	635	650	555
jg501	681	922	811	632	643	537	398	428	512	801	797	670	619	554	595	689	545	481	371	397	481	448	544	366	614	636	548
jg503	2023	2143	2012	1816	2019	1886	580	759	715	1924	2465	2859	2356	2414	2216	2095	2614	2397	987	1055	880	880	984	728	1386	1018	836
jg504	0	1	1	1	0	0	0	0	3	0	1	1	0	2	2	0	1	1	3	1	2	2	4	1	1	1	0
jg505	250	271	316	282	348	293	232	238	254	313	401	402	294	319	261	310	321	311	246	346	289	487	601	377	385	361	256
jg507	9	15	14	137	120	102	32	52	36	78	101	76	70	67	62	57	75	61	48	65	48	47	32	51	31	26	33
jg508	987	988	986	1034	990	863	308	391	374	782	1286	1053	1017	1419	1476	914	1361	1242	1520	951	1328	1149	1210	868	1561	1516	1454
jg509	178	230	239	399	434	396	150	170	174	326	484	400	430	1421	2706	793	1167	693	1260	1144	1149	1269	1476	849	1527	1229	1207
jg511	88	109	124	479	469	344	112	127	153	205	297	314	259	269	259	315	325	292	318	253	239	379	354	349	266	267	432
jg512	341	330	454	1086	1158	966	274	348	383	638	1016	1045	732	782	627	797	1157	891	873	721	671	886	868	874	888	777	1177
jg513	40	26	47	221	198	112	41	34	49	66	99	92	93	113	88	66	81	95	94	121	61	65	114	95	52	32	40
jg515	103	152	129	301	333	206	73	107	128	223	257	224	221	215	249	231	260	195	214	140	182	147	144	145	113	91	114
jg516	16	8	12	26	24	17	8	14	10	14	23	27	35	21	27	16	31	31	23	26	25	24	25	30	17	10	30
jg517	0	0	0	0	0	1	0	0	0	0	0	0	0	0	1	2	0	0	1	5	0	1	0	0	0	3	0
jg518	894	1221	1047	435	496	399	442	475	531	1181	921	905	1276	1026	1418	1061	1233	688	1015	603	3188	565	711	856	583	540	556
jg519	228	245	296	257	272	205	69	83	131	302	293	196	222	154	170	204	241	132	235	142	320	168	211	119	208	270	202
jg520	1	4	0	11	9	4	5	6	3	10	3	10	2	10	10	1	6	6	7	10	2	3	1	4	0	3	3
jg521	40	40	30	17	14	10	5	3	0	3	9	3	13	15	19	6	6	2	7	4	7	6	6	1	6	11	12
jg522	637	741	679	653	675	544	294	373	377	662	771	617	684	685	780	668	726	644	584	515	454	527	702	528	536	631	475
jg524	520	512	481	1374	1296	956	452	587	601	596	851	728	680	734	736	566	622	545	1254	1052	875	685	851	1088	399	351	308
jg525	11	9	15	694	686	537	258	359	379	444	526	622	478	581	562	804	872	669	1195	1317	1361	1176	1368	1755	1036	977	874
jg526	1	2	0	0	0	0	0	0	0	1	0	3	0	1	2	1	0	0	0	0	0	0	0	0	1	0	0
jg527	451	510	498	1301	1333	1128	321	354	377	419	525	575	350	343	451	310	349	325	296	212	215	129	199	196	85	65	95
jg528	803	951	779	228	275	239	74	86	89	197	270	155	205	142	157	98	165	138	49	70	31	76	54	63	81	65	52
jg529	321	386	341	529	519	391	118	139	136	236	343	315	348	296	330	240	323	272	251	177	190	114	202	188	163	150	121
jg530	431	476	510	319	300	236	141	151	203	344	416	274	252	274	283	294	265	223	249	248	242	204	252	250	259	267	208
jg531	986	1106	1020	758	840	656	376	428	443	843	982	929	856	694	767	815	898	736	613	652	669	511	504	519	569	598	524
jg532	1676	1960	1487	1141	1176	1039	376	361	378	997	1540	1588	1557	1424	1357	1370	1838	1430	1088	730	752	812	690	651	855	811	717
jg534	368	462	428	513	495	372	142	133	135	266	422	301	295	306	393	292	298	270	735	229	597	262	300	225	342	326	359
jg535	493	441	449	1280	1406	1110	138	227	209	589	715	485	974	1010	760	794	1047	1011	3811	1382	2696	1031	1158	1288	1193	1044	1616
jg536	84	64	73	298	354	259	62	107	105	145	208	213	141	172	170	158	137	119	160	159	209	99	170	187	105	114	101
jg537	307	357	389	294	266	246	87	140	133	221	257	209	169	123	162	157	191	189	100	121	114	106	129	121	190	264	239
jg538	2951	3595	2668	2226	2423	1787	1022	1169	1113	2969	4132	3107	4356	4027	3519	3735	4409	3579	627	1445	550	1636	1493	541	2011	1895	2138
jg539	3	4	2	0	4	1	1	0	0	0	1	0	2	0	0	1	2	4	1	0	0	1	0	2	0	0	0
jg540	13	15	19	194	179	144	72	124	118	194	211	190	329	461	407	475	586	483	977	879	1144	937	919	1026	769	824	1184
jg541	54	71	88	41	28	22	3	19	12	19	21	13	28	16	15	17	19	13	21	25	18	10	11	18	17	16	24
jg542	14	15	17	23	13	11	10	5	8	11	20	14	29	13	20	15	20	19	27	27	23	51	38	26	53	38	35
jg543	2	4	0	2	0	3	1	0	1	1	1	4	0	2	3	1	4	2	7	9	5	4	7	3	2	3	6
jg544	79	71	85	100	101	71	47	48	64	142	204	169	256	261	204	285	242	219	322	236	238	365	388	181	368	408	360
jg545	1685	2053	2042	1054	1201	890	765	720	884	1485	1725	1469	1696	2170	3089	1737	2181	1695	2462	2061	2738	2219	2722	2484	2270	2093	1712
jg546	46	34	53	104	144	114	35	26	23	89	138	155	203	179	73	204	191	154	62	78	49	83	91	33	184	103	146
jg547	8	7	14	28	24	25	0	1	10	2	18	8	19	19	17	12	22	25	34	23	28	8	39	18	33	33	32
jg548	104	88	92	200	187	144	47	34	41	54	75	127	108	134	143	119	185	142	302	180	211	193	221	194	292	282	257
jg549	770	965	955	676	637	500	181	234	267	309	630	565	443	381	395	361	482	397	239	359	393	232	347	236	286	296	283
jg550	23	22	26	215	179	199	38	51	62	86	95	127	76	95	91	60	80	70	129	100	100	55	92	117	34	43	33
jg551	42	62	55	413	410	350	72	96	95	203	201	169	112	157	149	133	190	157	216	173	221	139	167	185	97	77	75
jg552	2	6	2	5	3	9	0	1	0	7	3	6	10	16	1	17	15	13	57	94	82	113	129	30	105	179	124
jg553	411	512	510	809	735	642	206	241	266	365	498	490	528	506	481	506	583	539	735	608	604	489	587	620	275	245	252
jg554	130	181	160	261	340	231	69	130	118	128	162	132	142	125	146	96	164	133	200	116	135	84	144	107	78	134	110
jg555	13	6	4	137	186	146	6	4	3	48	69	58	488	596	587	135	373	328	1126	283	709	64	143	332	22	46	24
jg556	484	511	500	385	391	367	155	200	213	268	393	391	334	325	304	340	343	336	341	270	269	253	343	340	291	291	241
jg557	1057	1100	1222	1056	1039	839	361	405	448	749	1025	975	749	818	751	732	895	765	958	658	758	656	878	685	691	693	662
jg558	135	94	139	425	487	443	133	182	238	382	414	486	648	667	763	606	803	729	1425	920	1254	1144	1010	1486	939	789	1637
jg559	16	14	17	127	115	87	9	12	17	29	33	19	54	70	48	22	41	88	182	70	132	212	269	61	380	117	337
jg560	34	59	31	22	32	27	10	16	9	22	27	16	14	19	25	11	8	19	40	41	19	27	33	38	27	21	23
jg561	1283	1556	1333	539	556	432	230	341	335	704	986	860	765	741	674	744	771	633	326	323	291	381	427	315	474	366	377
jg562	551	511	511	215	268	253	104	116	94	271	438	423	312	326	235	273	280	226	162	162	180	136	163	116	259	167	169
jg563	233	324	333	274	297	206	65	62	85	67	93	58	45	46	64	37	34	31	20	46	33	32	15	26	83	150	221
jg564	2	2	5	6	6	11	0	0	3	6	4	14	2	5	0	5	4	3	0	0	1	1	1	0	0	0	2
jg566	1729	1963	1769	761	919	762	459	482	507	1191	1261	1158	1044	1064	1051	1158	1163	961	849	665	891	597	827	594	767	671	570
jg565	953	1084	1000	955	1004	791	483	586	623	1046	1289	1284	1595	1400	1344	1330	1614	1183	1002	1195	810	1027	1148	972	1266	1231	1087
jg567	1357	1961	1802	948	1031	839	972	910	1364	1794	1548	1639	1150	1123	1460	1438	1247	846	2766	1321	2774	1001	1942	1244	955	1051	903
jg568	807	937	848	730	791	684	295	322	398	716	823	601	534	499	513	482	581	387	755	355	780	395	664	365	553	461	432
jg569	2417	3027	2866	1527	1689	1231	817	901	1144	1722	2032	1754	1940	1661	1728	2052	1915	1465	1246	1146	1415	1217	1404	1163	1359	1420	1244
jg571	2098	2656	2052	2113	1968	1777	538	570	569	1003	1371	1801	800	830	849	917	1273	1006	1365	698	1259	681	1234	658	496	601	566
jg572	254	265	241	227	234	165	93	111	138	264	316	271	205	233	215	266	311	280	371	315	349	664	640	353	725	687	571
jg573	444	503	612	1011	1100	867	243	321	386	463	615	608	563	545	550	490	672	579	1694	778	1429	530	781	1116	440	268	322
jg574	0	0	0	0	0	0	0	0	0	3	1	2	0	1	1	0	0	0	2	0	1	0	0	0	0	0	0
jg576	1	0	3	4	0	1	1	4	2	1	0	2	0	2	1	1	3	0	1	5	5	0	0	0	0	8	0
jg577	1	5	1	0	0	0	0	0	0	0	0	0	0	0	0	0	0	0	0	0	0	1	0	1	0	0	0
jg578	1734	3238	2375	471	426	339	117	155	129	154	180	114	84	104	105	104	140	101	212	150	140	121	121	93	156	122	140
jg579	204	215	270	355	373	266	118	142	192	310	315	269	328	289	320	262	308	270	190	207	215	212	255	247	154	153	143
jg580	2482	3285	2736	1399	1454	1138	1148	1030	1402	2457	2759	2096	2138	1857	1831	2559	2296	1513	1259	1807	2487	1672	1911	1917	1690	1782	1549
jg581	2049	2981	2771	866	845	787	1447	1334	1946	2066	2182	2863	1734	1661	1837	2065	1785	1278	3621	2128	3815	1266	2072	2043	1171	1350	949
jg582	1	4	10	30	33	28	14	21	9	103	86	30	34	38	33	37	28	36	41	40	11	74	38	33	39	130	94
jg583	1	1	1	1	0	0	0	1	0	0	0	0	2	0	0	0	0	0	1	0	0	0	0	1	0	0	2
jg584	346	318	427	381	392	316	145	138	139	330	348	217	298	293	252	265	282	259	297	218	288	195	212	239	322	217	207
jg585	103	142	112	58	65	36	17	23	20	42	61	48	52	36	59	38	40	38	64	46	46	36	23	24	36	37	40
jg586	278	311	365	713	737	614	271	289	294	375	382	330	347	382	440	290	349	290	452	385	532	428	576	569	518	458	441
jg587	1074	1001	1187	89	106	103	302	224	322	638	995	833	703	513	530	508	553	297	69	103	34	77	112	122	111	132	178
jg588	0	0	0	1	0	0	0	0	0	0	1	0	0	1	0	0	0	2	0	0	2	0	2	1	1	2	1
jg591	648	726	678	1185	1181	1046	305	317	386	685	1014	1245	769	878	866	678	849	819	795	666	738	516	626	619	421	353	361
jg593	0	0	0	0	0	0	0	2	0	0	0	3	3	0	0	0	0	0	0	0	0	0	0	0	0	0	0
jg596	3104	3145	3322	4583	4843	4041	1629	1944	2000	3093	3836	2925	2945	3157	2926	2063	2544	2509	3576	3796	3386	3253	3624	3138	2345	2383	2028
jg597	43	62	46	49	41	59	20	8	12	39	41	37	29	29	35	36	28	25	109	24	72	40	47	36	31	30	41
jg598	674	747	753	672	713	522	267	227	306	557	613	504	473	487	476	504	609	486	1005	407	1049	473	672	415	638	624	466
jg599	7	2	2	12	18	17	12	8	9	12	12	27	8	14	6	2	13	9	13	11	13	17	25	19	17	20	14
jg600	1186	1642	1495	320	328	297	102	101	107	177	176	161	126	138	113	115	140	71	187	171	167	135	238	164	112	152	149
jg601	6	16	10	11	16	13	6	5	2	12	8	3	6	6	7	10	3	10	5	2	9	2	1	3	5	2	1
jg602	228	286	250	784	663	531	487	491	439	872	670	898	518	643	619	634	533	459	98	216	150	456	441	178	529	433	260
jg603	58	105	103	24	11	9	2	3	10	15	6	20	14	18	15	35	41	28	39	67	42	98	77	120	36	506	60
jg604	821	1166	1053	139	161	147	43	56	80	145	83	221	220	279	175	617	428	502	284	294	327	837	545	672	345	7827	269
jg605	145	138	144	470	432	388	124	164	152	164	242	270	192	195	209	154	188	211	304	284	321	224	302	304	154	175	127
jg606	11	11	12	13	11	15	0	2	6	4	12	12	5	7	13	1	4	8	10	2	18	4	11	8	5	5	2
jg607	396	496	533	649	604	485	287	370	411	418	672	624	682	747	634	579	727	540	665	597	609	402	476	540	381	332	299
jg608	1054	1178	1138	1477	1444	1051	379	435	474	629	873	1001	806	839	906	683	867	778	1554	817	802	802	923	869	521	538	432
jg610	336	538	555	641	516	404	114	166	104	111	271	232	238	235	237	216	254	254	484	277	339	370	470	318	343	401	304
jg611	0	3	2	0	0	1	0	2	0	3	0	2	3	1	0	2	4	7	6	0	0	7	9	2	1	0	0
jg612	374	365	389	318	306	254	154	172	150	285	382	308	310	266	313	320	326	343	321	306	276	309	341	268	450	468	355
jg613	644	747	651	355	466	305	189	215	278	463	686	403	487	413	344	415	451	402	324	259	472	279	296	234	386	404	360
jg614	467	467	403	367	409	286	143	145	170	313	446	317	248	147	97	103	148	160	43	35	54	48	62	29	54	57	65
jg615	323	397	410	205	248	196	167	193	212	385	407	292	375	394	376	452	444	311	149	219	179	218	249	155	320	255	239
jg616	2100	2336	2480	1459	1358	1191	738	810	795	1030	1660	1975	1863	1824	1716	1711	2025	1876	790	1273	840	1038	1122	907	1142	1270	997
jg617	18	13	16	34	31	28	19	9	28	19	38	36	28	44	33	32	42	38	73	40	80	39	53	80	44	43	31
jg618	64	71	81	244	226	146	71	77	75	94	151	147	118	143	111	104	139	122	346	214	290	149	206	246	157	183	127
jg619	69	58	64	186	154	114	31	41	49	71	154	62	99	121	112	90	150	114	159	117	121	118	171	174	193	201	187
jg620	211	232	216	225	306	207	91	106	104	161	259	308	277	263	221	279	304	225	302	187	347	219	239	227	237	300	226
jg621	0	1	0	0	0	1	0	0	0	0	0	0	0	0	0	0	0	0	0	0	1	0	1	0	0	0	0
jg623	22	22	16	274	269	198	73	57	85	108	101	88	70	72	89	59	62	94	101	108	76	52	75	99	60	45	30
jg624	19	12	11	188	205	179	64	43	48	84	102	85	50	72	97	44	64	81	95	85	83	52	65	89	32	34	27
jg625	0	0	2	1	1	1	0	0	0	1	0	1	0	0	1	0	1	0	2	0	0	0	0	0	0	1	0
jg626	1580	1737	1751	1575	1647	1279	486	533	578	900	1395	1299	1186	1126	1146	909	1161	1198	786	760	807	717	724	620	681	602	621
jg627	171	158	172	135	125	124	42	39	75	77	138	124	106	105	139	98	125	100	113	89	117	98	112	105	117	81	101
jg628	427	597	599	302	318	295	239	195	287	519	517	450	484	431	394	456	464	358	200	333	356	347	440	305	377	397	298
jg629	1540	2017	1853	476	530	420	1983	1617	2330	4187	2981	3156	3145	2177	2234	3305	2907	1895	364	1244	1292	1469	1285	1263	1475	1887	1100
jg630	0	0	0	0	0	0	0	0	0	1	0	0	0	0	0	0	0	0	0	0	1	0	0	0	0	0	0
jg631	1212	1387	1239	3207	3190	2647	487	605	594	1320	1941	2077	1226	1595	1601	1078	1848	1633	3300	1374	2384	1531	1160	1291	1387	1198	1804
jg632	148	168	174	1492	1653	1239	332	359	472	951	1322	728	922	1204	1010	830	832	822	944	705	753	1056	898	774	758	787	733
jg633	121	147	134	372	332	238	134	135	153	205	327	328	318	333	280	292	368	334	248	278	288	222	346	315	184	248	174
jg634	16	8	14	6	10	8	12	23	17	18	22	24	33	26	10	14	19	24	16	15	27	20	13	23	14	25	16
jg636	1211	1278	1155	1686	1696	1520	850	876	943	1271	1626	1904	1552	1529	1555	1827	1908	1275	1421	1282	1385	1141	1376	1279	1030	973	850
jg638	2788	3012	2703	1812	1843	1402	524	868	745	858	703	676	380	364	467	197	277	232	635	389	2390	296	248	326	183	205	188
jg639	4906	5589	5204	3383	3515	2998	1725	1883	2096	3487	3848	3997	3414	3567	3974	3293	3776	3028	2578	2708	2690	2114	2815	2435	2604	2455	2199
jg640	283	342	304	1967	2174	1509	539	628	627	1424	1758	1064	1234	1112	1336	1181	1497	1353	866	1133	689	1764	2355	724	2329	1657	1378
jg641	1417	1700	1502	1099	1206	1022	524	544	650	1002	1215	1231	1218	1240	1205	1151	1289	1205	1147	889	964	872	960	902	953	923	864
jg643	133	154	168	31	24	25	22	10	7	29	38	40	17	17	6	2	4	7	0	4	0	1	3	2	22	11	21
jg644	253	344	281	48	60	48	40	25	26	66	84	52	18	23	15	1	12	6	4	0	0	4	4	2	39	16	29
jg645	984	1173	1047	170	194	146	116	108	120	177	292	196	83	45	77	25	34	17	7	12	8	17	12	14	105	69	116
jg646	0	0	0	0	0	0	0	0	0	0	0	0	1	0	0	0	0	0	0	0	0	0	0	0	0	0	0
jg647	297	345	343	369	438	364	192	236	211	287	468	330	364	365	349	297	348	324	538	427	587	415	612	514	431	423	354
jg648	11	22	24	19	25	16	9	17	8	33	29	25	31	33	30	24	36	24	36	23	32	28	29	36	34	32	24
jg650	92	124	100	164	209	165	87	103	89	251	321	212	403	359	317	292	349	241	1073	565	799	911	1177	1051	594	695	547
jg651	108	118	136	167	207	130	45	45	54	95	133	72	81	64	88	65	66	77	88	60	84	43	67	36	74	74	95
jg652	369	441	465	812	985	601	187	240	215	616	739	646	880	754	667	732	892	718	1930	1076	1774	1239	1186	1037	1347	1208	1477
jg654	3	5	0	19	8	22	20	20	35	85	147	116	172	163	97	223	205	138	51	49	38	57	66	72	114	115	109
jg655	4	8	10	10	15	10	1	2	1	3	7	9	7	9	6	3	12	7	15	7	9	7	7	9	16	18	10
jg656	431	563	550	852	951	796	196	266	262	532	843	587	610	675	693	555	768	685	1160	588	891	593	766	545	805	872	804
jg657	378	301	362	4250	3941	3354	187	247	251	863	1478	1005	553	786	614	769	1334	1617	3447	1867	2366	2144	1603	1347	2180	2259	2309
jg658	83	65	87	197	202	161	36	72	70	159	170	98	181	149	174	122	163	146	236	186	227	154	201	177	185	218	166
jg659	0	0	0	0	0	0	0	0	0	16	17	14	17	16	16	17	13	6	10	33	24	13	14	6	29	29	11
jg660	0	0	0	0	0	1	0	0	0	0	0	1	0	0	0	0	0	0	0	0	0	0	0	0	0	0	0
jg661	840	1038	937	803	860	676	272	346	360	709	918	688	651	663	760	608	764	570	712	440	601	426	506	400	446	383	412
jg662	1844	2277	1830	394	493	396	589	532	801	1098	1444	1219	994	870	860	1032	1007	884	317	520	391	509	499	469	594	664	456
jg663	1606	1966	1741	2205	2247	1975	940	1005	1173	1737	2134	2164	1818	1862	1624	1928	1935	1530	1878	1752	1790	2139	2928	1752	2295	1895	1638
jg664	492	532	485	761	675	526	197	257	232	356	467	461	528	464	511	489	597	425	606	476	554	498	545	607	563	401	432
jg665	9	22	8	8	1	1	6	2	0	1	2	4	6	4	4	5	2	2	0	0	3	3	1	2	7	1	10
jg666	1810	2284	2016	738	851	758	690	771	793	1429	1403	1511	1465	1456	1477	1610	1464	1262	2794	1368	3085	1302	2256	1906	1256	1154	1009
jg667	52	87	62	15	14	10	3	1	6	7	15	11	14	12	12	14	23	18	16	9	12	7	6	7	15	13	7
jg668	748	938	840	1093	1105	869	555	608	673	1114	1279	1113	1016	929	947	1146	1144	947	558	907	730	659	714	880	885	712	549
jg669	623	400	630	2014	2027	1939	740	681	868	1280	1836	1350	1649	1644	1984	2275	2501	1842	302	544	300	3622	2211	576	5215	395	616
jg670	1199	1255	1269	2329	2415	1763	1416	1395	1523	4045	5000	4928	6137	5294	5591	6813	6869	5083	2007	2906	1924	3386	2983	2819	4357	3782	4374
jg673	201	201	207	2131	2289	1882	459	641	672	916	905	958	758	788	839	712	757	767	1203	1059	1082	663	821	961	398	382	267
jg678	1155	1098	1082	2380	2279	1968	527	648	693	899	1242	1507	1262	1427	1404	1145	1567	1508	1863	1345	1344	1136	1339	1408	1272	975	1159
jg679	3848	4166	4128	3147	3414	2805	1676	1592	2025	3547	4469	3499	3339	3500	3498	3290	3790	2867	2667	2316	2621	2777	2892	2644	3043	4123	2959
jg680	859	965	1026	656	643	528	249	265	313	584	982	727	782	785	567	758	792	704	735	494	730	572	631	438	875	829	679
jg681	146	166	172	917	1021	774	161	182	238	418	404	341	358	493	394	307	470	459	402	352	393	175	329	380	123	118	119
jg682	101	127	141	253	226	251	86	124	148	243	224	240	231	180	230	260	259	271	257	248	264	276	290	243	390	433	378
jg683	26	18	18	93	70	61	59	73	73	253	450	435	684	704	810	859	1120	709	8823	1926	11210	2991	7931	1800	1769	1080	2102
jg684	23	21	26	72	75	65	21	18	28	35	67	63	54	76	62	57	58	66	34	30	33	14	19	17	24	16	12
jg685	364	437	384	1902	1802	1514	473	486	465	873	1308	1424	1138	1328	1116	835	1256	1205	809	608	665	507	444	438	329	248	277
jg686	327	440	360	347	379	300	165	160	168	432	550	443	647	623	510	557	653	518	316	172	249	239	217	226	299	167	277
jg689	10	8	16	12	13	7	2	9	3	8	2	2	1	1	1	2	4	2	3	1	5	0	0	5	1	3	0
jg691	313	362	289	197	180	141	65	46	73	124	178	121	171	192	185	199	193	235	350	235	232	198	269	162	465	310	322
jg692	2	0	1	1	1	1	0	1	2	0	0	0	2	1	0	0	3	0	11	3	3	1	6	0	0	1	4
jg693	2093	2246	2252	1992	2171	1818	1125	1183	1362	2470	3179	2284	2510	2079	2644	2672	2834	1991	1258	1336	1260	1743	1802	1176	2580	2106	2278
jg694	1575	1979	1617	579	624	512	267	363	295	732	1157	739	697	561	446	372	462	456	255	78	39	379	390	127	313	327	216
jg695	140	154	138	46	57	48	18	15	23	41	73	33	29	23	47	26	32	49	33	45	79	42	23	42	84	57	64
jg696	64	52	44	69	41	27	24	24	24	51	78	33	25	53	20	26	37	69	51	29	67	25	46	53	86	85	66
jg697	139	125	116	91	113	95	40	49	32	125	117	136	203	210	176	190	300	330	463	349	417	380	375	331	776	612	690
jg699	893	1003	962	408	466	346	203	191	228	464	588	623	455	428	425	456	464	332	344	252	312	270	271	205	367	390	376
[truncated: 24,141 more rows]
