# Supplementary material for: The transcriptional landscape underlying larval development and metamorphosis in the Malabar grouper (Epinephelus malabaricus)
Source: eLife. 2024 Aug 9;13:RP94573. doi: 10.7554/eLife.94573 (PMC11315451; doi:10.7554/eLife.94573)
Supplement: Source data 2. [file elife-94573-data2.xlsx]

## Sheet: D3_D32_sig_clusters_annotations
gene	cluster	baseMean	padj	Description	Length	GO IDs	GO Names	Enzyme Codes	Enzyme Names
jg3168	1	2197.63	3.10977e-56	kalirin-like	7059	P:GO:0007411; P:GO:0007417; P:GO:0050790; F:GO:0000166; F:GO:0005085; C:GO:0005737	P:axon guidance; P:central nervous system development; P:regulation of catalytic activity; F:nucleotide binding; F:guanyl-nucleotide exchange factor activity; C:cytoplasm	EC:2.7.11.1	Non-specific serine/threonine protein kinase
jg3191	1	1755.54	2.7195e-107	formin-like protein 2	3276	P:GO:0022604; P:GO:0030036; F:GO:0003779; F:GO:0031267	P:regulation of cell morphogenesis; P:actin cytoskeleton organization; F:actin binding; F:small GTPase binding	NA	NA
jg3226	1	775.635	1.19625e-06	arf-GAP with GTPase, ANK repeat and PH domain-containing protein 1 isoform X2	2472	P:GO:0036445; P:GO:0048259; P:GO:0050790; P:GO:0055059; P:GO:0060582; P:GO:0072089; P:GO:0072375; P:GO:0090630; P:GO:0098722; F:GO:0003924; F:GO:0005096; F:GO:0005515; F:GO:0005525; F:GO:0046872; C:GO:0016020	P:neuronal stem cell division; P:regulation of receptor-mediated endocytosis; P:regulation of catalytic activity; P:asymmetric neuroblast division; P:cell fate determination involved in pattern specification; P:stem cell proliferation; P:medium-term memory; P:activation of GTPase activity; P:asymmetric stem cell division; F:GTPase activity; F:GTPase activator activity; F:protein binding; F:GTP bi…	EC:3.6.1; EC:3.6; EC:3	Acting on acid anhydrides; Acting on acid anhydrides; Hydrolases
jg3250	1	1044.28	3.10715e-06	CLIP-associating protein 1-B-like isoform X1	4230	P:GO:0001578; P:GO:0006903; P:GO:0007020; P:GO:0007026; P:GO:0007030; P:GO:0010389; P:GO:0010458; P:GO:0010470; P:GO:0010634; P:GO:0010717; P:GO:0030953; P:GO:0031023; P:GO:0031116; P:GO:0034453; P:GO:0040001; P:GO:0040019; P:GO:0045921; P:GO:0051294; P:GO:0051301; P:GO:0051497; P:GO:0051893; P:GO:0090091; P:GO:0090162; P:GO:0090307; P:GO:0097711; P:GO:1903391; P:GO:1903690; P:GO:1904261; P:GO:19…	P:microtubule bundle formation; P:vesicle targeting; P:microtubule nucleation; P:negative regulation of microtubule depolymerization; P:Golgi organization; P:regulation of G2/M transition of mitotic cell cycle; P:exit from mitosis; P:regulation of gastrulation; P:positive regulation of epithelial cell migration; P:regulation of epithelial to mesenchymal transition; P:astral microtubule organizati…	NA	NA
jg3276	1	812.567	7.91354e-06	glutaminase a isoform X1	1866	P:GO:0001967; P:GO:0002087; P:GO:0006537; P:GO:0006541; P:GO:0006543; P:GO:0007268; P:GO:0014047; P:GO:0046717; P:GO:0051289; P:GO:0051704; F:GO:0004359; F:GO:0042802; C:GO:0005759; C:GO:0005829	P:suckling behavior; P:regulation of respiratory gaseous exchange by nervous system process; P:glutamate biosynthetic process; P:glutamine metabolic process; P:glutamine catabolic process; P:chemical synaptic transmission; P:glutamate secretion; P:acid secretion; P:protein homotetramerization; P:multi-organism process; F:glutaminase activity; F:identical protein binding; C:mitochondrial matrix; C…	EC:3.5.1.2; EC:3.5.1; EC:3.5; EC:3	Glutaminase; Acting on carbon-nitrogen bonds, other than peptide bonds; Acting on carbon-nitrogen bonds, other than peptide bonds; Hydrolases
jg3325	1	697.379	6.98306e-10	activin receptor type-2A isoform X1	1626	P:GO:0001702; P:GO:0001745; P:GO:0003156; P:GO:0006468; P:GO:0007178; P:GO:0007179; P:GO:0007283; P:GO:0007368; P:GO:0007391; P:GO:0007411; P:GO:0007428; P:GO:0007443; P:GO:0008258; P:GO:0008340; P:GO:0009798; P:GO:0009952; P:GO:0009953; P:GO:0010470; P:GO:0010628; P:GO:0010629; P:GO:0010862; P:GO:0018991; P:GO:0022604; P:GO:0030325; P:GO:0030501; P:GO:0030513; P:GO:0030514; P:GO:0030536; P:GO:00…	P:gastrulation with mouth forming second; P:compound eye morphogenesis; P:regulation of animal organ formation; P:protein phosphorylation; P:transmembrane receptor protein serine/threonine kinase signaling pathway; P:transforming growth factor beta receptor signaling pathway; P:spermatogenesis; P:determination of left/right symmetry; P:dorsal closure; P:axon guidance; P:primary branching, open tr…	EC:2.7.1; EC:2.7; EC:2; EC:2.7.11.30	Transferring phosphorus-containing groups; Transferring phosphorus-containing groups; Transferases; Receptor protein serine/threonine kinase
jg3330	1	1142.83	2.03513e-47	kinesin heavy chain-like	2961	P:GO:0001754; P:GO:0002066; P:GO:0007018; P:GO:0007303; P:GO:0007310; P:GO:0007317; P:GO:0007411; P:GO:0008103; P:GO:0008104; P:GO:0008345; P:GO:0009792; P:GO:0010769; P:GO:0010940; P:GO:0030473; P:GO:0031507; P:GO:0035617; P:GO:0040038; P:GO:0044087; P:GO:0045664; P:GO:0045892; P:GO:0045995; P:GO:0046785; P:GO:0046843; P:GO:0048312; P:GO:0048489; P:GO:0048741; P:GO:0048814; P:GO:0050767; P:GO:00…	P:eye photoreceptor cell differentiation; P:columnar/cuboidal epithelial cell development; P:microtubule-based movement; P:cytoplasmic transport, nurse cell to oocyte; P:oocyte dorsal/ventral axis specification; P:regulation of pole plasm oskar mRNA localization; P:axon guidance; P:oocyte microtubule cytoskeleton polarization; P:protein localization; P:larval locomotory behavior; P:embryo develop…	EC:3.6.1; EC:3.6; EC:3; EC:5.6.1.3	Acting on acid anhydrides; Acting on acid anhydrides; Hydrolases; Plus-end-directed kinesin ATPase
jg3331	1	540.644	3.18808e-41	plakophilin-4-like isoform X1	3420	P:GO:0001745; P:GO:0010172; P:GO:0032467; P:GO:0032880; P:GO:0032956; P:GO:0034334; P:GO:0043547; P:GO:0060997; P:GO:0098609; F:GO:0045296; C:GO:0005737; C:GO:0005813; C:GO:0005912; C:GO:0016342; C:GO:0030054	P:compound eye morphogenesis; P:embryonic body morphogenesis; P:positive regulation of cytokinesis; P:regulation of protein localization; P:regulation of actin cytoskeleton organization; P:adherens junction maintenance; P:positive regulation of GTPase activity; P:dendritic spine morphogenesis; P:cell-cell adhesion; F:cadherin binding; C:cytoplasm; C:centrosome; C:adherens junction; C:catenin comp…	NA	NA
jg3364	1	365.572	1.89511e-32	double-stranded RNA-specific editase 1-like isoform X1	2256	P:GO:0001666; P:GO:0006382; P:GO:0006396; P:GO:0006979; P:GO:0007274; P:GO:0007420; P:GO:0008049; P:GO:0008285; P:GO:0008340; P:GO:0008344; P:GO:0009408; P:GO:0010628; P:GO:0016556; P:GO:0021610; P:GO:0021618; P:GO:0021965; P:GO:0030336; P:GO:0035264; P:GO:0040028; P:GO:0042391; P:GO:0042752; P:GO:0043903; P:GO:0044387; P:GO:0045070; P:GO:0045475; P:GO:0050685; P:GO:0050884; P:GO:0050921; P:GO:00…	P:response to hypoxia; P:adenosine to inosine editing; P:RNA processing; P:response to oxidative stress; P:neuromuscular synaptic transmission; P:brain development; P:male courtship behavior; P:negative regulation of cell population proliferation; P:determination of adult lifespan; P:adult locomotory behavior; P:response to heat; P:positive regulation of gene expression; P:mRNA modification; P:fa…	EC:3.5.4; EC:3; EC:3.5; EC:3.5.4.4	Acting on carbon-nitrogen bonds, other than peptide bonds; Hydrolases; Acting on carbon-nitrogen bonds, other than peptide bonds; Adenosine deaminase
jg3436	1	2193.17	9.01066e-18	neuropilin-2a isoform X1	2745	P:GO:0001525; P:GO:0001938; P:GO:0003148; P:GO:0007155; P:GO:0007411; P:GO:0010595; P:GO:0018108; P:GO:0021612; P:GO:0021649; P:GO:0021824; P:GO:0021828; P:GO:0036486; P:GO:0038084; P:GO:0048010; P:GO:0048846; P:GO:0050919; P:GO:0051240; P:GO:0061549; P:GO:0061551; P:GO:0071526; P:GO:0097374; P:GO:0097490; P:GO:0097491; P:GO:1901166; P:GO:1902285; P:GO:1903375; P:GO:1904835; P:GO:1990830; F:GO:00…	P:angiogenesis; P:positive regulation of endothelial cell proliferation; P:outflow tract septum morphogenesis; P:cell adhesion; P:axon guidance; P:positive regulation of endothelial cell migration; P:peptidyl-tyrosine phosphorylation; P:facial nerve structural organization; P:vestibulocochlear nerve structural organization; P:cerebral cortex tangential migration using cell-axon interactions; P:go…	EC:2.7.10.1; EC:2.7.1; EC:2.7; EC:2	Receptor protein-tyrosine kinase; Transferring phosphorus-containing groups; Transferring phosphorus-containing groups; Transferases
jg3468	1	297.513	3.0957e-39	peripheral plasma membrane protein CASK-like	531	P:GO:0001953; P:GO:0002066; P:GO:0006468; P:GO:0007163; P:GO:0007298; P:GO:0007615; P:GO:0007616; P:GO:0007628; P:GO:0008049; P:GO:0008582; P:GO:0009410; P:GO:0009636; P:GO:0010628; P:GO:0010839; P:GO:0016080; P:GO:0016081; P:GO:0017156; P:GO:0018991; P:GO:0021987; P:GO:0032024; P:GO:0040012; P:GO:0040026; P:GO:0045666; P:GO:0045944; P:GO:0046037; P:GO:0046677; P:GO:0046710; P:GO:0046907; P:GO:00…	P:negative regulation of cell-matrix adhesion; P:columnar/cuboidal epithelial cell development; P:protein phosphorylation; P:establishment or maintenance of cell polarity; P:border follicle cell migration; P:anesthesia-resistant memory; P:long-term memory; P:adult walking behavior; P:male courtship behavior; P:regulation of synaptic assembly at neuromuscular junction; P:response to xenobiotic sti…	EC:2.7.1; EC:2.7.4.4; EC:2.7.11.1; EC:2.7.4.8; EC:2.7; EC:2; EC:2.7.4	Transferring phosphorus-containing groups; Nucleoside-phosphate kinase; Non-specific serine/threonine protein kinase; Guanylate kinase; Transferring phosphorus-containing groups; Transferases; Transferring phosphorus-containing groups
jg3473	1	232.588	4.50671e-60	interleukin-1 receptor accessory protein-like 1 isoform X1	2148	NA	NA	NA	NA
jg3478	1	543.179	2.1094e-49	FERM and PDZ domain-containing protein 4-like isoform X2	5634	P:GO:0007165; P:GO:0051835; F:GO:0005546; C:GO:0005856; C:GO:0032991; C:GO:0043197	P:signal transduction; P:positive regulation of synapse structural plasticity; F:phosphatidylinositol-4,5-bisphosphate binding; C:cytoskeleton; C:protein-containing complex; C:dendritic spine	NA	NA
jg3486	1	548.755	4.83815e-88	SLIT and NTRK-like protein 5	2628	P:GO:0007268; P:GO:0007409; P:GO:0007625; P:GO:0009410; P:GO:0021756; P:GO:0030534; P:GO:0043588; P:GO:0048813; P:GO:0051965; P:GO:0072359; C:GO:0005886; C:GO:0016021; C:GO:0043235	P:chemical synaptic transmission; P:axonogenesis; P:grooming behavior; P:response to xenobiotic stimulus; P:striatum development; P:adult behavior; P:skin development; P:dendrite morphogenesis; P:positive regulation of synapse assembly; P:circulatory system development; C:plasma membrane; C:integral component of membrane; C:receptor complex	NA	NA
jg3488	1	454.066	1.37466e-40	SLIT and NTRK-like protein 6	2532	P:GO:0001964; P:GO:0002066; P:GO:0002088; P:GO:0002093; P:GO:0007409; P:GO:0007601; P:GO:0008344; P:GO:0021562; P:GO:0031223; P:GO:0035264; P:GO:0051965; P:GO:0060007; P:GO:0060384; P:GO:0060563; P:GO:0090102; P:GO:1905606; C:GO:0005887; C:GO:0009986; C:GO:0016021	P:startle response; P:columnar/cuboidal epithelial cell development; P:lens development in camera-type eye; P:auditory receptor cell morphogenesis; P:axonogenesis; P:visual perception; P:adult locomotory behavior; P:vestibulocochlear nerve development; P:auditory behavior; P:multicellular organism growth; P:positive regulation of synapse assembly; P:linear vestibuloocular reflex; P:innervation; P…	NA	NA
jg3491	1	877.877	1.691e-89	SLIT and NTRK-like protein 1	2115	P:GO:0007409; P:GO:0010770; P:GO:0010976; P:GO:0030534; P:GO:0035264; P:GO:0042592; P:GO:0045666; P:GO:0050772; P:GO:0051965; P:GO:1905606; C:GO:0005886; C:GO:0016021; C:GO:0045202	P:axonogenesis; P:positive regulation of cell morphogenesis involved in differentiation; P:positive regulation of neuron projection development; P:adult behavior; P:multicellular organism growth; P:homeostatic process; P:positive regulation of neuron differentiation; P:positive regulation of axonogenesis; P:positive regulation of synapse assembly; P:regulation of presynapse assembly; C:plasma mem…	NA	NA
jg3495	1	197.514	6.19201e-36	gamma-aminobutyric acid receptor subunit alpha-5-like	1413	P:GO:0001662; P:GO:0006821; P:GO:0007420; P:GO:0007605; P:GO:0008306; P:GO:0034220; P:GO:0042752; P:GO:0043524; P:GO:0060012; P:GO:0060079; P:GO:0060119; P:GO:0060384; P:GO:0090102; P:GO:0098655; P:GO:1902476; P:GO:1904456; F:GO:0004890; F:GO:0005230; F:GO:0005254; F:GO:0005261; F:GO:0015108; F:GO:0016933; F:GO:0022839; F:GO:0022851; F:GO:0022852; F:GO:0050811; C:GO:0005654; C:GO:0005829; C:GO:00…	P:behavioral fear response; P:chloride transport; P:brain development; P:sensory perception of sound; P:associative learning; P:ion transmembrane transport; P:regulation of circadian rhythm; P:negative regulation of neuron apoptotic process; P:synaptic transmission, glycinergic; P:excitatory postsynaptic potential; P:inner ear receptor cell development; P:innervation; P:cochlea development; P:cat…	EC:7	Translocases
jg3520	1	4663.4	3.83893e-46	R3H domain-containing protein 1 isoform X1	3351	P:GO:0007282; P:GO:0007294; P:GO:0007310; P:GO:0007317; P:GO:0030717; P:GO:0044087; P:GO:0045995; P:GO:0048134; P:GO:0051128; P:GO:0060281; P:GO:1902875; P:GO:1903429; F:GO:0005515; C:GO:0005737	P:cystoblast division; P:germarium-derived oocyte fate determination; P:oocyte dorsal/ventral axis specification; P:regulation of pole plasm oskar mRNA localization; P:oocyte karyosome formation; P:regulation of cellular component biogenesis; P:regulation of embryonic development; P:germ-line cyst formation; P:regulation of cellular component organization; P:regulation of oocyte development; P:re…	NA	NA
jg3530	1	375.188	3.73582e-17	STE20-related kinase adapter protein beta isoform X1	1290	P:GO:0000902; P:GO:0006468; P:GO:0006611; P:GO:0007010; P:GO:0007254; P:GO:0007346; P:GO:0015833; P:GO:0022402; P:GO:0032147; P:GO:0032989; P:GO:0045786; P:GO:2001240; F:GO:0004672; F:GO:0005524; C:GO:0005634; C:GO:0005829; C:GO:0016235	P:cell morphogenesis; P:protein phosphorylation; P:protein export from nucleus; P:cytoskeleton organization; P:JNK cascade; P:regulation of mitotic cell cycle; P:peptide transport; P:cell cycle process; P:activation of protein kinase activity; P:cellular component morphogenesis; P:negative regulation of cell cycle; P:negative regulation of extrinsic apoptotic signaling pathway in absence of ligan…	EC:2.7.1; EC:2.7; EC:2	Transferring phosphorus-containing groups; Transferring phosphorus-containing groups; Transferases
jg3536	1	193.043	2.23747e-19	transmembrane protein FAM155A-like	1152	P:GO:0006266; F:GO:0003910; C:GO:0016021	P:DNA ligation; F:DNA ligase (ATP) activity; C:integral component of membrane	EC:6.5; EC:6; EC:6.5.1.1	Forming phosphoric ester bonds; Ligases; DNA ligase (ATP)
jg3583	1	314	1.21357e-69	cysteine/serine-rich nuclear protein 3-like isoform X1	2055	P:GO:0008285; P:GO:0010628; P:GO:0045944; F:GO:0043565; C:GO:0005634	P:negative regulation of cell population proliferation; P:positive regulation of gene expression; P:positive regulation of transcription by RNA polymerase II; F:sequence-specific DNA binding; C:nucleus	NA	NA
jg3584	1	1076.81	2.02014e-75	sodium channel, voltage-gated, type I like, alpha b isoform X1	6048	P:GO:0006954; P:GO:0007628; P:GO:0009611; P:GO:0009791; P:GO:0019227; P:GO:0019228; P:GO:0035725; P:GO:0042552; P:GO:0043179; P:GO:0046684; P:GO:0048266; P:GO:0050884; P:GO:0050966; P:GO:0071236; P:GO:0086002; P:GO:0086010; F:GO:0005248; F:GO:0005516; F:GO:0031402; F:GO:0043522; C:GO:0001518; C:GO:0014704; C:GO:0016604; C:GO:0030018; C:GO:0030315; C:GO:0033268; C:GO:0043025; C:GO:0043194	P:inflammatory response; P:adult walking behavior; P:response to wounding; P:post-embryonic development; P:neuronal action potential propagation; P:neuronal action potential; P:sodium ion transmembrane transport; P:myelination; P:rhythmic excitation; P:response to pyrethroid; P:behavioral response to pain; P:neuromuscular process controlling posture; P:detection of mechanical stimulus involved in…	EC:7	Translocases
jg3586	1	194.364	5.48284e-60	fidgetin-like isoform X2	2421	P:GO:0007049; F:GO:0005524	P:cell cycle; F:ATP binding	NA	NA
jg3588	1	540.574	6.25454e-51	potassium voltage-gated channel subfamily H member 7 isoform X1	3660	P:GO:0007623; P:GO:0034765; P:GO:0042391; P:GO:0051291; P:GO:0071805; F:GO:0005242; F:GO:0005249; F:GO:0022839; C:GO:0005887; C:GO:0016021	P:circadian rhythm; P:regulation of ion transmembrane transport; P:regulation of membrane potential; P:protein heterooligomerization; P:potassium ion transmembrane transport; F:inward rectifier potassium channel activity; F:voltage-gated potassium channel activity; F:ion gated channel activity; C:integral component of plasma membrane; C:integral component of membrane	EC:7	Translocases
jg3592	1	506.935	1.26097e-87	sodium-driven chloride bicarbonate exchanger-like isoform X1	1110	P:GO:0006486; P:GO:0007271; P:GO:0009416; P:GO:0009791; P:GO:0015698; P:GO:0015701; P:GO:0021860; P:GO:0032228; P:GO:0035264; P:GO:0035641; P:GO:0035725; P:GO:0046685; P:GO:0048854; P:GO:0051453; P:GO:0098656; P:GO:1902476; P:GO:1902600; F:GO:0005452; F:GO:0008510; F:GO:0015108; F:GO:0015301; C:GO:0005887; C:GO:0016021; C:GO:0016323; C:GO:0043025; C:GO:0097440; C:GO:0097441; C:GO:0097442	P:protein glycosylation; P:synaptic transmission, cholinergic; P:response to light stimulus; P:post-embryonic development; P:inorganic anion transport; P:bicarbonate transport; P:pyramidal neuron development; P:regulation of synaptic transmission, GABAergic; P:multicellular organism growth; P:locomotory exploration behavior; P:sodium ion transmembrane transport; P:response to arsenic-containing s…	EC:7	Translocases
jg3600	1	515.579	6.50212e-55	protein FAM117B	915	NA	NA	NA	NA
jg3616	1	684.225	2.28213e-21	probable phospholipid-transporting ATPase IH isoform X3	3540	P:GO:0015711; P:GO:0043312; P:GO:0045332; F:GO:0000287; F:GO:0005524; F:GO:0005548; F:GO:0016887; F:GO:0042626; F:GO:0140326; C:GO:0005783; C:GO:0005886; C:GO:0016021; C:GO:0035579; C:GO:0055037; C:GO:0070821	P:organic anion transport; P:neutrophil degranulation; P:phospholipid translocation; F:magnesium ion binding; F:ATP binding; F:phospholipid transporter activity; F:ATP hydrolysis activity; F:ATPase-coupled transmembrane transporter activity; F:ATPase-coupled intramembrane lipid transporter activity; C:endoplasmic reticulum; C:plasma membrane; C:integral component of membrane; C:specific granule m…	EC:3.6.1; EC:3.6.3.1; EC:7.6.2.1; EC:3.6; EC:3; EC:7	Acting on acid anhydrides; Acting on acid anhydrides; P-type phospholipid transporter; Acting on acid anhydrides; Hydrolases; Translocases
jg3653	1	557.735	9.61695e-63	voltage-dependent L-type calcium channel subunit beta-4-like isoform X1	1914	P:GO:0006836; P:GO:0007186; P:GO:0007214; P:GO:0007528; P:GO:0007628; P:GO:0008285; P:GO:0014051; P:GO:0015718; P:GO:0016322; P:GO:0019227; P:GO:0019722; P:GO:0035249; P:GO:0040017; P:GO:0046058; P:GO:0048536; P:GO:0048538; P:GO:0048541; P:GO:0050852; P:GO:0050908; P:GO:0051899; P:GO:0055002; P:GO:0061199; P:GO:0070588; P:GO:1901387; P:GO:1904751; P:GO:1990830; P:GO:2000134; F:GO:0005245; F:GO:00…	P:neurotransmitter transport; P:G protein-coupled receptor signaling pathway; P:gamma-aminobutyric acid signaling pathway; P:neuromuscular junction development; P:adult walking behavior; P:negative regulation of cell population proliferation; P:gamma-aminobutyric acid secretion; P:monocarboxylic acid transport; P:neuron remodeling; P:neuronal action potential propagation; P:calcium-mediated signa…	EC:7	Translocases
jg3694	1	1234.69	1.85322e-86	neuronal membrane glycoprotein M6-b-like	879	P:GO:0001745; P:GO:0007399; P:GO:0030501; P:GO:0032956; P:GO:0046956; P:GO:0048477; P:GO:0051612; P:GO:0051893; P:GO:0085029; P:GO:1903391; P:GO:2000009; C:GO:0005886; C:GO:0016021; C:GO:0045121	P:compound eye morphogenesis; P:nervous system development; P:positive regulation of bone mineralization; P:regulation of actin cytoskeleton organization; P:positive phototaxis; P:oogenesis; P:negative regulation of serotonin uptake; P:regulation of focal adhesion assembly; P:extracellular matrix assembly; P:regulation of adherens junction organization; P:negative regulation of protein localizati…	NA	NA
jg3719	1	2172.52	5.18325e-56	protein unc-80 homolog isoform X2	10311	P:GO:0009410; P:GO:0040017; P:GO:0055080; P:GO:0098655; F:GO:0005261; C:GO:0005886; C:GO:0030424; C:GO:0034703	P:response to xenobiotic stimulus; P:positive regulation of locomotion; P:cation homeostasis; P:cation transmembrane transport; F:cation channel activity; C:plasma membrane; C:axon; C:cation channel complex	EC:7	Translocases
jg3732	1	147.318	7.07865e-25	Krueppel-like factor 7	906	P:GO:0007411; P:GO:0010628; P:GO:0045944; P:GO:0048813; F:GO:0000978; F:GO:0001228; F:GO:0003713; F:GO:0008270	P:axon guidance; P:positive regulation of gene expression; P:positive regulation of transcription by RNA polymerase II; P:dendrite morphogenesis; F:RNA polymerase II cis-regulatory region sequence-specific DNA binding; F:DNA-binding transcription activator activity, RNA polymerase II-specific; F:transcription coactivator activity; F:zinc ion binding	NA	NA
jg3757	1	914.693	8.36914e-206	poly(rC)-binding protein 3-like isoform X1	1059	P:GO:0000122; P:GO:0000381; P:GO:0010629; P:GO:0040040; F:GO:0001227; F:GO:0003690; F:GO:0003723; F:GO:1990829; C:GO:0005634	P:negative regulation of transcription by RNA polymerase II; P:regulation of alternative mRNA splicing, via spliceosome; P:negative regulation of gene expression; P:thermosensory behavior; F:DNA-binding transcription repressor activity, RNA polymerase II-specific; F:double-stranded DNA binding; F:RNA binding; F:C-rich single-stranded DNA binding; C:nucleus	NA	NA
jg3767	1	544.867	1.88566e-53	protein FAM171B	2433	C:GO:0016021	C:integral component of membrane	NA	NA
jg3806	1	259.17	1.09445e-67	neural cell adhesion molecule 2-like isoform X1	2109	P:GO:0001746; P:GO:0007155; P:GO:0007156; P:GO:0007158; P:GO:0007413; P:GO:0007614; P:GO:0008045; P:GO:0008355; P:GO:0008360; P:GO:0008582; P:GO:0009410; P:GO:0009636; P:GO:0016319; P:GO:0035158; P:GO:0042059; P:GO:0045665; P:GO:0046677; P:GO:0048149; P:GO:0048167; P:GO:0048803; P:GO:0050768; P:GO:0072499; P:GO:0072553; P:GO:1904800; F:GO:0042802; C:GO:0005737; C:GO:0016021; C:GO:0016604; C:GO:00…	P:Bolwig's organ morphogenesis; P:cell adhesion; P:homophilic cell adhesion via plasma membrane adhesion molecules; P:neuron cell-cell adhesion; P:axonal fasciculation; P:short-term memory; P:motor neuron axon guidance; P:olfactory learning; P:regulation of cell shape; P:regulation of synaptic assembly at neuromuscular junction; P:response to xenobiotic stimulus; P:response to toxic substance; P:…	NA	NA
jg3818	1	915.178	2.01462e-06	FERM, ARHGEF and pleckstrin domain-containing protein 1-like isoform X3	2694	P:GO:0007416; P:GO:0010923; P:GO:0048813; P:GO:0050790; F:GO:0005085; F:GO:0008092; F:GO:0031267; C:GO:0005829; C:GO:0005856; C:GO:0030425; C:GO:0031234	P:synapse assembly; P:negative regulation of phosphatase activity; P:dendrite morphogenesis; P:regulation of catalytic activity; F:guanyl-nucleotide exchange factor activity; F:cytoskeletal protein binding; F:small GTPase binding; C:cytosol; C:cytoskeleton; C:dendrite; C:extrinsic component of cytoplasmic side of plasma membrane	NA	NA
jg980	1	3611.08	1.68342e-54	ankyrin-2b isoform X6	9201	P:GO:0003283; P:GO:0006888; P:GO:0010171; P:GO:0010628; P:GO:0010881; P:GO:0033292; P:GO:0033563; P:GO:0034394; P:GO:0036309; P:GO:0036371; P:GO:0040018; P:GO:0050821; P:GO:0060307; P:GO:0070972; P:GO:0086005; P:GO:0086036; P:GO:0086046; P:GO:0086091; P:GO:0098904; P:GO:0098907; P:GO:0098910; P:GO:1901018; P:GO:1901021; P:GO:2001259; F:GO:0015459; F:GO:0019901; F:GO:0030507; F:GO:0030674; F:GO:00…	P:atrial septum development; P:endoplasmic reticulum to Golgi vesicle-mediated transport; P:body morphogenesis; P:positive regulation of gene expression; P:regulation of cardiac muscle contraction by regulation of the release of sequestered calcium ion; P:T-tubule organization; P:dorsal/ventral axon guidance; P:protein localization to cell surface; P:protein localization to M-band; P:protein loca…	NA	NA
jg1026	1	319.226	1.6538e-39	myotubularin-related protein 1a isoform X1	2082	P:GO:0000278; P:GO:0006470; P:GO:0006661; P:GO:0007059; P:GO:0009611; P:GO:0030031; P:GO:0030866; P:GO:0032456; P:GO:0060304; P:GO:1901075; F:GO:0004438; F:GO:0005546; F:GO:0008138; F:GO:0042803; F:GO:0052629; C:GO:0005829; C:GO:0005886; C:GO:0045179	P:mitotic cell cycle; P:protein dephosphorylation; P:phosphatidylinositol biosynthetic process; P:chromosome segregation; P:response to wounding; P:cell projection assembly; P:cortical actin cytoskeleton organization; P:endocytic recycling; P:regulation of phosphatidylinositol dephosphorylation; P:negative regulation of engulfment of apoptotic cell; F:phosphatidylinositol-3-phosphatase activity; …	EC:3.1; EC:3; EC:3.1.3.64; EC:3.1.3.95; EC:3.1.3	Acting on ester bonds; Hydrolases; Phosphatidylinositol-3-phosphatase; Phosphatidylinositol-3,5-bisphosphate 3-phosphatase; Acting on ester bonds
jg1049	1	966.712	3.63859e-29	uncharacterized protein si:dkey-28a3.2	4416	NA	NA	NA	NA
jg1059	1	10933.7	1.18635e-36	glycogen phosphorylase, muscle form	2529	P:GO:0001666; P:GO:0005977; P:GO:0006874; P:GO:0008340; P:GO:0045819; P:GO:0051591; F:GO:0008184; F:GO:0016208; F:GO:0030170; F:GO:0030246; F:GO:0042803; F:GO:0102250; F:GO:0102499; C:GO:0005829; C:GO:0016529; C:GO:0030018; C:GO:0032991; C:GO:0098723	P:response to hypoxia; P:glycogen metabolic process; P:cellular calcium ion homeostasis; P:determination of adult lifespan; P:positive regulation of glycogen catabolic process; P:response to cAMP; F:glycogen phosphorylase activity; F:AMP binding; F:pyridoxal phosphate binding; F:carbohydrate binding; F:protein homodimerization activity; F:linear malto-oligosaccharide phosphorylase activity; F:SHG…	EC:2.4.1.1; EC:2.4; EC:2; EC:2.4.1	Glycogen phosphorylase; Glycosyltransferases; Transferases; Glycosyltransferases
jg1154	1	382.378	3.53119e-59	neurexin 2b isoform X1	3318	P:GO:0007158; P:GO:0007165; P:GO:0007269; P:GO:0030534; P:GO:0035176; P:GO:0042297; P:GO:0051704; P:GO:0065009; P:GO:0071625; P:GO:0097116; P:GO:0097118; P:GO:0097119; F:GO:0004888; F:GO:0005246; F:GO:0050839; F:GO:0097109; C:GO:0032991; C:GO:0042734	P:neuron cell-cell adhesion; P:signal transduction; P:neurotransmitter secretion; P:adult behavior; P:social behavior; P:vocal learning; P:multi-organism process; P:regulation of molecular function; P:vocalization behavior; P:gephyrin clustering involved in postsynaptic density assembly; P:neuroligin clustering involved in postsynaptic membrane assembly; P:postsynaptic density protein 95 clusteri…	NA	NA
jg1158	1	464.75	1.02156e-49	neurexin 2b isoform X1	1755	P:GO:0007158; P:GO:0007165; P:GO:0007269; P:GO:0030534; P:GO:0035176; P:GO:0042297; P:GO:0051704; P:GO:0065009; P:GO:0071625; P:GO:0097116; P:GO:0097118; P:GO:0097119; F:GO:0004888; F:GO:0005246; F:GO:0050839; F:GO:0097109; C:GO:0016021; C:GO:0032991; C:GO:0042734	P:neuron cell-cell adhesion; P:signal transduction; P:neurotransmitter secretion; P:adult behavior; P:social behavior; P:vocal learning; P:multi-organism process; P:regulation of molecular function; P:vocalization behavior; P:gephyrin clustering involved in postsynaptic density assembly; P:neuroligin clustering involved in postsynaptic membrane assembly; P:postsynaptic density protein 95 clusteri…	NA	NA
jg1215	1	300.488	2.74332e-26	neuroligin-2a isoform X1	2520	P:GO:0001966; P:GO:0002087; P:GO:0007155; P:GO:0007158; P:GO:0007420; P:GO:0007630; P:GO:0008284; P:GO:0019233; P:GO:0032024; P:GO:0032230; P:GO:0035176; P:GO:0035641; P:GO:0045217; P:GO:0045666; P:GO:0048488; P:GO:0050769; P:GO:0050804; P:GO:0050808; P:GO:0050885; P:GO:0051704; P:GO:0051965; P:GO:0051968; P:GO:0060999; P:GO:0072553; P:GO:0097104; P:GO:0097105; P:GO:0097116; P:GO:0097119; P:GO:00…	P:thigmotaxis; P:regulation of respiratory gaseous exchange by nervous system process; P:cell adhesion; P:neuron cell-cell adhesion; P:brain development; P:jump response; P:positive regulation of cell population proliferation; P:sensory perception of pain; P:positive regulation of insulin secretion; P:positive regulation of synaptic transmission, GABAergic; P:social behavior; P:locomotory explora…	EC:3.1; EC:3; EC:3.1.1.1	Acting on ester bonds; Hydrolases; Carboxylesterase
jg1272	1	572.532	3.30997e-102	protein O-GlcNAcase	2322	P:GO:0008152; F:GO:0016798	P:metabolic process; F:hydrolase activity, acting on glycosyl bonds	EC:3.2; EC:3.2.1.169; EC:3; EC:2.3.1.48	Glycosylases; Protein O-GlcNAcase; Hydrolases; Histone acetyltransferase
jg1275	1	1055.53	7.66949e-42	synaptotagmin-4	1419	P:GO:0002792; P:GO:0006887; P:GO:0007420; P:GO:0007613; P:GO:0010976; P:GO:0014049; P:GO:0014059; P:GO:0030100; P:GO:0031339; P:GO:0031340; P:GO:0032387; P:GO:0033604; P:GO:0045666; P:GO:0048174; P:GO:0048791; P:GO:0050709; P:GO:0050769; P:GO:0061782; P:GO:0061792; P:GO:0097480; P:GO:0098693; P:GO:1902804; P:GO:1903861; P:GO:1905414; P:GO:1905415; P:GO:1905433; P:GO:2000301; P:GO:2001023; F:GO:00…	P:negative regulation of peptide secretion; P:exocytosis; P:brain development; P:memory; P:positive regulation of neuron projection development; P:positive regulation of glutamate secretion; P:regulation of dopamine secretion; P:regulation of endocytosis; P:negative regulation of vesicle fusion; P:positive regulation of vesicle fusion; P:negative regulation of intracellular transport; P:negative …	NA	NA
jg1304	1	299.407	3.31811e-47	serine/threonine-protein phosphatase 2A 56 kDa regulatory subunit beta isoform	1578	P:GO:0001933; P:GO:0006914; P:GO:0007059; P:GO:0007165; P:GO:0008340; P:GO:0009408; P:GO:0010469; P:GO:0010628; P:GO:0010888; P:GO:0010976; P:GO:0014066; P:GO:0022618; P:GO:0031334; P:GO:0031952; P:GO:0036498; P:GO:0040024; P:GO:0043085; P:GO:0043666; P:GO:0045666; P:GO:0045880; P:GO:0045944; P:GO:0046627; P:GO:0050730; P:GO:0050769; P:GO:0050790; P:GO:0051091; P:GO:0051225; P:GO:0051388; P:GO:00…	P:negative regulation of protein phosphorylation; P:autophagy; P:chromosome segregation; P:signal transduction; P:determination of adult lifespan; P:response to heat; P:regulation of signaling receptor activity; P:positive regulation of gene expression; P:negative regulation of lipid storage; P:positive regulation of neuron projection development; P:regulation of phosphatidylinositol 3-kinase sig…	NA	NA
jg1326	1	485.677	6.65258e-83	leucine-rich repeat and fibronectin type-III domain-containing protein 4	2988	P:GO:0007409; C:GO:0005615; C:GO:0005886; C:GO:0009986; C:GO:0016021	P:axonogenesis; C:extracellular space; C:plasma membrane; C:cell surface; C:integral component of membrane	NA	NA
jg1358	1	461.119	2.97396e-72	sodium/potassium/calcium exchanger 2-like isoform X1	1902	P:GO:0006816; P:GO:0006874; P:GO:0007601; P:GO:0035725; P:GO:0048749; P:GO:0070588; P:GO:0071805; P:GO:0098656; F:GO:0005262; F:GO:0005509; F:GO:0008273; F:GO:0030955; F:GO:0031402; C:GO:0005887; C:GO:0016021	P:calcium ion transport; P:cellular calcium ion homeostasis; P:visual perception; P:sodium ion transmembrane transport; P:compound eye development; P:calcium ion transmembrane transport; P:potassium ion transmembrane transport; P:anion transmembrane transport; F:calcium channel activity; F:calcium ion binding; F:calcium, potassium:sodium antiporter activity; F:potassium ion binding; F:sodium ion …	EC:7	Translocases
jg1361	1	227.775	9.11175e-08	coiled-coil domain-containing protein 149-A isoform X2	1728	C:GO:0097546	C:ciliary base	NA	NA
jg1383	1	5568.45	5.5239e-130	receptor-type tyrosine-protein phosphatase S isoform X19	5508	P:GO:0002066; P:GO:0007157; P:GO:0007185; P:GO:0007283; P:GO:0007412; P:GO:0008045; P:GO:0008594; P:GO:0031290; P:GO:0035335; P:GO:0045467; P:GO:0045666; P:GO:0046426; P:GO:0048841; P:GO:0050770; P:GO:0050775; P:GO:0050776; P:GO:0051124; P:GO:0051491; P:GO:0051965; P:GO:0060269; P:GO:0097105; P:GO:1900006; P:GO:1902532; P:GO:1902667; P:GO:1903386; F:GO:0005001; F:GO:0005102; F:GO:0032093; F:GO:00…	P:columnar/cuboidal epithelial cell development; P:heterophilic cell-cell adhesion via plasma membrane cell adhesion molecules; P:transmembrane receptor protein tyrosine phosphatase signaling pathway; P:spermatogenesis; P:axon target recognition; P:motor neuron axon guidance; P:photoreceptor cell morphogenesis; P:retinal ganglion cell axon guidance; P:peptidyl-tyrosine dephosphorylation; P:R7 cel…	EC:3.1; EC:3.1.3.48; EC:3; EC:3.1.3	Acting on ester bonds; Protein-tyrosine-phosphatase; Hydrolases; Acting on ester bonds
jg1391	1	1009.32	1.41908e-29	adhesion G protein-coupled receptor L3-like isoform X1	4683	P:GO:0001764; P:GO:0007186; P:GO:0007420; P:GO:0009410; P:GO:0031987; P:GO:0042220; P:GO:0051965; P:GO:0060359; P:GO:0072347; P:GO:0098742; F:GO:0004930; F:GO:0005509; C:GO:0005887; C:GO:0005911; C:GO:0030424	P:neuron migration; P:G protein-coupled receptor signaling pathway; P:brain development; P:response to xenobiotic stimulus; P:locomotion involved in locomotory behavior; P:response to cocaine; P:positive regulation of synapse assembly; P:response to ammonium ion; P:response to anesthetic; P:cell-cell adhesion via plasma-membrane adhesion molecules; F:G protein-coupled receptor activity; F:calcium…	NA	NA
jg1397	1	927.1	2.79908e-86	ELAV-like protein 2 isoform X1	1431	P:GO:0000398; P:GO:0006355; P:GO:1990830; F:GO:0003730; C:GO:0005654; C:GO:1990904	P:mRNA splicing, via spliceosome; P:regulation of transcription, DNA-templated; P:cellular response to leukemia inhibitory factor; F:mRNA 3'-UTR binding; C:nucleoplasm; C:ribonucleoprotein complex	NA	NA
jg1457	1	1240.91	1.9432e-31	vigilin	3807	P:GO:0006338; P:GO:0007059; P:GO:0030261; P:GO:0031497; P:GO:0031507; P:GO:0045727; F:GO:0003696; F:GO:0003697; F:GO:0003723; F:GO:0003730; C:GO:0000792; C:GO:0005634; C:GO:0005701; C:GO:0098687; C:GO:1990904	P:chromatin remodeling; P:chromosome segregation; P:chromosome condensation; P:chromatin assembly; P:heterochromatin assembly; P:positive regulation of translation; F:satellite DNA binding; F:single-stranded DNA binding; F:RNA binding; F:mRNA 3'-UTR binding; C:heterochromatin; C:nucleus; C:polytene chromosome chromocenter; C:chromosomal region; C:ribonucleoprotein complex	NA	NA
jg1472	1	527.365	1.53527e-08	NHS-like protein 2 isoform X2	3885	P:GO:0030154	P:cell differentiation	NA	NA
jg1497	1	485.625	3.45488e-77	wiskott-Aldrich syndrome protein family member 3 isoform X1	1578	P:GO:0030036; F:GO:0003779; C:GO:0005737; C:GO:0005856	P:actin cytoskeleton organization; F:actin binding; C:cytoplasm; C:cytoskeleton	NA	NA
jg1552	1	1757.12	1.09686e-81	Purkinje cell protein 4-like protein 1	249	NA	NA	NA	NA
jg1564	1	1944.27	8.70587e-20	protein NDRG2	1104	P:GO:0001818; P:GO:0001933; P:GO:0007399; P:GO:0007420; P:GO:0010574; P:GO:0016055; P:GO:0030154; P:GO:0048662; P:GO:0070373; P:GO:0090361; C:GO:0005634; C:GO:0005737; C:GO:0005794; C:GO:0005829; C:GO:0030426	P:negative regulation of cytokine production; P:negative regulation of protein phosphorylation; P:nervous system development; P:brain development; P:regulation of vascular endothelial growth factor production; P:Wnt signaling pathway; P:cell differentiation; P:negative regulation of smooth muscle cell proliferation; P:negative regulation of ERK1 and ERK2 cascade; P:regulation of platelet-derived …	NA	NA
jg1600	1	1415.7	7.50981e-06	kinesin light chain 2	1890	P:GO:0006890; P:GO:0008088; P:GO:0019886; F:GO:0019894; C:GO:0005654; C:GO:0005737; C:GO:0005739; C:GO:0005829; C:GO:0005871; C:GO:0005874; C:GO:0005886; C:GO:0016938; C:GO:0035253; C:GO:0043005	P:retrograde vesicle-mediated transport, Golgi to endoplasmic reticulum; P:axo-dendritic transport; P:antigen processing and presentation of exogenous peptide antigen via MHC class II; F:kinesin binding; C:nucleoplasm; C:cytoplasm; C:mitochondrion; C:cytosol; C:kinesin complex; C:microtubule; C:plasma membrane; C:kinesin I complex; C:ciliary rootlet; C:neuron projection	NA	NA
jg1604	1	1043.09	5.22469e-12	RNA-binding protein 14b isoform X1	1713	F:GO:0003723; F:GO:0008270; C:GO:0005634	F:RNA binding; F:zinc ion binding; C:nucleus	NA	NA
jg1644	1	717.188	7.50751e-55	neuropeptide-like protein C4orf48 homolog	273	P:GO:0007218; F:GO:0017188; C:GO:0005576	P:neuropeptide signaling pathway; F:aspartate N-acetyltransferase activity; C:extracellular region	EC:2.3; EC:2; EC:2.3.1.17; EC:2.3.1	Acyltransferases; Transferases; Aspartate N-acetyltransferase; Acyltransferases
jg1727	1	827.625	6.07885e-23	protocadherin-7b isoform X3	2721	P:GO:0002576; P:GO:0007155; C:GO:0005887; C:GO:0016020; C:GO:0031092	P:platelet degranulation; P:cell adhesion; C:integral component of plasma membrane; C:membrane; C:platelet alpha granule membrane	NA	NA
jg1739	1	352.454	2.54803e-53	NACHT and WD repeat domain-containing protein 2 isoform X1	5232	NA	NA	NA	NA
jg1830	1	377.406	4.68577e-55	tripartite motif-containing protein 2-like	2016	F:GO:0008270; C:GO:0005737	F:zinc ion binding; C:cytoplasm	NA	NA
jg1872	1	349.79	3.05568e-90	F-box only protein 41-like	2469	NA	NA	NA	NA
jg1915	1	269.611	1.68804e-33	endophilin-A1-like	1191	P:GO:0000045; P:GO:0002090; P:GO:0007417; P:GO:0009267; P:GO:0010940; P:GO:0016191; P:GO:0019886; P:GO:0042059; P:GO:0050803; P:GO:0060988; P:GO:0097484; P:GO:0097749; P:GO:0097753; P:GO:0098657; P:GO:0099050; P:GO:1903527; P:GO:1990416; P:GO:2000369; F:GO:0005543; F:GO:0008022; F:GO:0008289; F:GO:0019901; F:GO:0042171; F:GO:0042803; F:GO:0043168; C:GO:0000139; C:GO:0005737; C:GO:0005769; C:GO:00…	P:autophagosome assembly; P:regulation of receptor internalization; P:central nervous system development; P:cellular response to starvation; P:positive regulation of necrotic cell death; P:synaptic vesicle uncoating; P:antigen processing and presentation of exogenous peptide antigen via MHC class II; P:negative regulation of epidermal growth factor receptor signaling pathway; P:regulation of syna…	EC:2.3; EC:2; EC:2.3.1	Acyltransferases; Transferases; Acyltransferases
jg20	1	643.114	3.94379e-134	UPF0606 protein KIAA1549	4254	C:GO:0016021	C:integral component of membrane	NA	NA
jg47	1	310.616	6.027e-64	thyrotropin-releasing hormone-degrading ectoenzyme-like	3045	P:GO:0006508; P:GO:0007165; P:GO:0007267; P:GO:0008217; P:GO:0043171; F:GO:0004177; F:GO:0008237; F:GO:0008270; F:GO:0042277; F:GO:0070006; C:GO:0005737; C:GO:0005887; C:GO:0016021	P:proteolysis; P:signal transduction; P:cell-cell signaling; P:regulation of blood pressure; P:peptide catabolic process; F:aminopeptidase activity; F:metallopeptidase activity; F:zinc ion binding; F:peptide binding; F:metalloaminopeptidase activity; C:cytoplasm; C:integral component of plasma membrane; C:integral component of membrane	EC:3.4.11; EC:3.4.19.6; EC:3.4; EC:3	Acting on peptide bonds (peptidases); Pyroglutamyl-peptidase II; Acting on peptide bonds (peptidases); Hydrolases
jg61	1	801.189	9.66918e-158	SLIT-ROBO Rho GTPase-activating protein 1-like isoform X2	3279	P:GO:0007165	P:signal transduction	NA	NA
jg69	1	494.894	3.5511e-83	coiled-coil domain-containing protein 136-like isoform X1	1278	P:GO:0001675; P:GO:0007338; C:GO:0002080; C:GO:0016021	P:acrosome assembly; P:single fertilization; C:acrosomal membrane; C:integral component of membrane	NA	NA
jg89	1	1527.69	2.16114e-52	glutamate receptor-interacting protein 1	3291	P:GO:0006606; P:GO:0007268; P:GO:0010628; P:GO:0010976; P:GO:0015833; P:GO:0016204; P:GO:0016310; P:GO:0016358; P:GO:0030521; P:GO:0035556; P:GO:0043113; P:GO:0045197; P:GO:0045666; P:GO:0045893; P:GO:0046037; P:GO:0046710; P:GO:0046940; P:GO:0048644; P:GO:0050769; P:GO:0050808; P:GO:0097120; P:GO:0150012; P:GO:1901068; F:GO:0003713; F:GO:0004385; F:GO:0005198; F:GO:0008013; F:GO:0008022; F:GO:00…	P:protein import into nucleus; P:chemical synaptic transmission; P:positive regulation of gene expression; P:positive regulation of neuron projection development; P:peptide transport; P:determination of muscle attachment site; P:phosphorylation; P:dendrite development; P:androgen receptor signaling pathway; P:intracellular signal transduction; P:receptor clustering; P:establishment or maintenance…	EC:2.7.4.4; EC:2.7.4.8; EC:2.7; EC:2; EC:2.7.4	Nucleoside-phosphate kinase; Guanylate kinase; Transferring phosphorus-containing groups; Transferases; Transferring phosphorus-containing groups
jg108	1	258.963	1.54314e-75	receptor-type tyrosine-protein phosphatase R	1749	P:GO:0001701; P:GO:0001933; P:GO:0010633; P:GO:0030182; P:GO:0035335; P:GO:0038128; P:GO:0070373; F:GO:0004725; F:GO:0005001; F:GO:0019901; C:GO:0005829; C:GO:0005886; C:GO:0016021; C:GO:0030054; C:GO:0048471	P:in utero embryonic development; P:negative regulation of protein phosphorylation; P:negative regulation of epithelial cell migration; P:neuron differentiation; P:peptidyl-tyrosine dephosphorylation; P:ERBB2 signaling pathway; P:negative regulation of ERK1 and ERK2 cascade; F:protein tyrosine phosphatase activity; F:transmembrane receptor protein tyrosine phosphatase activity; F:protein kinase b…	EC:3.1; EC:3.1.3.48; EC:3; EC:3.1.3	Acting on ester bonds; Protein-tyrosine-phosphatase; Hydrolases; Acting on ester bonds
jg167	1	114.878	7.58356e-39	probable G-protein coupled receptor 19	1272	P:GO:0007218; P:GO:0007268; P:GO:0007631; F:GO:0008188; C:GO:0005886; C:GO:0005887; C:GO:0016021	P:neuropeptide signaling pathway; P:chemical synaptic transmission; P:feeding behavior; F:neuropeptide receptor activity; C:plasma membrane; C:integral component of plasma membrane; C:integral component of membrane	NA	NA
jg173	1	1078.35	7.07081e-10	receptor-type tyrosine-protein phosphatase O isoform X1	3705	P:GO:0002548; P:GO:0003105; P:GO:0010771; P:GO:0010812; P:GO:0030032; P:GO:0035335; P:GO:0036060; P:GO:0045665; P:GO:0050771; P:GO:0072112; P:GO:0090090; P:GO:0090260; F:GO:0005001; F:GO:0017147; F:GO:0042803; C:GO:0005887; C:GO:0016324; C:GO:0016328; C:GO:0030027; C:GO:0030426; C:GO:0043197	P:monocyte chemotaxis; P:negative regulation of glomerular filtration; P:negative regulation of cell morphogenesis involved in differentiation; P:negative regulation of cell-substrate adhesion; P:lamellipodium assembly; P:peptidyl-tyrosine dephosphorylation; P:slit diaphragm assembly; P:negative regulation of neuron differentiation; P:negative regulation of axonogenesis; P:glomerular visceral epi…	EC:3.1; EC:3.1.3.48; EC:3; EC:3.1.3	Acting on ester bonds; Protein-tyrosine-phosphatase; Hydrolases; Acting on ester bonds
jg254	1	1009.26	4.53165e-24	endosome/lysosome-associated apoptosis and autophagy regulator family member 2-like	3015	C:GO:0005886; C:GO:0016021	C:plasma membrane; C:integral component of membrane	NA	NA
jg256	1	180.39	3.04798e-53	nuclear receptor-interacting protein 2	831	P:GO:0000122; P:GO:0006508; P:GO:0007219; P:GO:0010629; F:GO:0004190; C:GO:0005634; C:GO:0005737	P:negative regulation of transcription by RNA polymerase II; P:proteolysis; P:Notch signaling pathway; P:negative regulation of gene expression; F:aspartic-type endopeptidase activity; C:nucleus; C:cytoplasm	EC:3.4.23; EC:3.4; EC:3	Acting on peptide bonds (peptidases); Acting on peptide bonds (peptidases); Hydrolases
jg281	1	1743.44	1.2277e-119	synaptotagmin-1a isoform X1	1269	P:GO:0005513; P:GO:0007269; P:GO:0007317; P:GO:0007420; P:GO:0008345; P:GO:0010940; P:GO:0010976; P:GO:0014047; P:GO:0014059; P:GO:0030421; P:GO:0031340; P:GO:0043051; P:GO:0044087; P:GO:0045666; P:GO:0045956; P:GO:0045995; P:GO:0046717; P:GO:0046907; P:GO:0046928; P:GO:0048278; P:GO:0048488; P:GO:0048489; P:GO:0050769; P:GO:0050803; P:GO:0050806; P:GO:0051260; P:GO:0051291; P:GO:0051966; P:GO:00…	P:detection of calcium ion; P:neurotransmitter secretion; P:regulation of pole plasm oskar mRNA localization; P:brain development; P:larval locomotory behavior; P:positive regulation of necrotic cell death; P:positive regulation of neuron projection development; P:glutamate secretion; P:regulation of dopamine secretion; P:defecation; P:positive regulation of vesicle fusion; P:regulation of pharyn…	NA	NA
jg293	1	1050.87	4.66264e-89	liprin-alpha-2 isoform X2	3645	NA	NA	NA	NA
jg318	1	445.58	1.0582e-34	membrane-associated guanylate kinase, WW and PDZ domain-containing protein 2a isoform X7	3666	P:GO:0002092; P:GO:0003094; P:GO:0003402; P:GO:0007616; P:GO:0008285; P:GO:0010976; P:GO:0022402; P:GO:0030336; P:GO:0032516; P:GO:0032880; P:GO:0032926; P:GO:0038180; P:GO:0045666; P:GO:0045930; P:GO:0046959; P:GO:0050769; P:GO:0051291; P:GO:0051898; P:GO:0060395; P:GO:0072015; P:GO:0097118; P:GO:0098693; P:GO:1905330; P:GO:2000809; F:GO:0005198; F:GO:0008013; F:GO:0019894; F:GO:0019902; F:GO:00…	P:positive regulation of receptor internalization; P:glomerular filtration; P:planar cell polarity pathway involved in axis elongation; P:long-term memory; P:negative regulation of cell population proliferation; P:positive regulation of neuron projection development; P:cell cycle process; P:negative regulation of cell migration; P:positive regulation of phosphoprotein phosphatase activity; P:regu…	NA	NA
jg331	1	198.879	1.22694e-45	LHFPL tetraspan subfamily member 3 protein	690	P:GO:0007605; C:GO:0016021	P:sensory perception of sound; C:integral component of membrane	NA	NA
jg381	1	1299.23	8.95653e-51	ankyrin repeat and sterile alpha motif domain-containing protein 1B isoform X1	4044	P:GO:0051668; P:GO:1900383; F:GO:0046875; C:GO:0005737; C:GO:0005829; C:GO:0005886; C:GO:0014069; C:GO:0015030; C:GO:0043197	P:localization within membrane; P:regulation of synaptic plasticity by receptor localization to synapse; F:ephrin receptor binding; C:cytoplasm; C:cytosol; C:plasma membrane; C:postsynaptic density; C:Cajal body; C:dendritic spine	NA	NA
jg415	1	840.498	3.49233e-65	leucine-rich repeat-containing protein 4	2865	P:GO:0006469; P:GO:0019221; P:GO:0046426; P:GO:0050807; P:GO:0097119; P:GO:1902532; F:GO:0004860; C:GO:0005737; C:GO:0016021; C:GO:0043197; C:GO:0045211; C:GO:0060076	P:negative regulation of protein kinase activity; P:cytokine-mediated signaling pathway; P:negative regulation of receptor signaling pathway via JAK-STAT; P:regulation of synapse organization; P:postsynaptic density protein 95 clustering; P:negative regulation of intracellular signal transduction; F:protein kinase inhibitor activity; C:cytoplasm; C:integral component of membrane; C:dendritic spin…	NA	NA
jg421	1	2342.53	4.92928e-79	protein piccolo isoform X1	15267	P:GO:0007010; P:GO:0016080; P:GO:0017156; P:GO:0017157; P:GO:0019933; P:GO:0030073; P:GO:0035418; P:GO:0046907; P:GO:0048489; P:GO:0048790; P:GO:0097480; P:GO:0099172; P:GO:0099526; F:GO:0001222; F:GO:0005509; F:GO:0005522; F:GO:0005544; F:GO:0043168; F:GO:0046872; F:GO:0098882; F:GO:0099181; C:GO:0005802; C:GO:0014069; C:GO:0030133; C:GO:0030425; C:GO:0030426; C:GO:0031594; C:GO:0042995; C:GO:00…	P:cytoskeleton organization; P:synaptic vesicle targeting; P:calcium-ion regulated exocytosis; P:regulation of exocytosis; P:cAMP-mediated signaling; P:insulin secretion; P:protein localization to synapse; P:intracellular transport; P:synaptic vesicle transport; P:maintenance of presynaptic active zone structure; P:establishment of synaptic vesicle localization; P:presynapse organization; P:presy…	NA	NA
jg431	1	419.372	6.73439e-46	protein O-mannosyl-transferase TMTC2	2598	P:GO:0035269; P:GO:0055074; F:GO:0004169; C:GO:0005783; C:GO:0005789; C:GO:0016021	P:protein O-linked mannosylation; P:calcium ion homeostasis; F:dolichyl-phosphate-mannose-protein mannosyltransferase activity; C:endoplasmic reticulum; C:endoplasmic reticulum membrane; C:integral component of membrane	EC:2.4.1.109; EC:2.4; EC:2; EC:2.4.1	Dolichyl-phosphate-mannose--protein mannosyltransferase; Glycosyltransferases; Transferases; Glycosyltransferases
jg438	1	457.754	1.18442e-74	IQ motif and SEC7 domain-containing protein 3 isoform X2	2454	P:GO:0030036; P:GO:0032012; P:GO:0050790; P:GO:0090630; F:GO:0005085; C:GO:0005737; C:GO:0045211; C:GO:0060077	P:actin cytoskeleton organization; P:regulation of ARF protein signal transduction; P:regulation of catalytic activity; P:activation of GTPase activity; F:guanyl-nucleotide exchange factor activity; C:cytoplasm; C:postsynaptic membrane; C:inhibitory synapse	NA	NA
jg457	1	966.772	1.86067e-59	plexin-A4 isoform X1	5748	P:GO:0010769; P:GO:0021612; P:GO:0021615; P:GO:0021637; P:GO:0021644; P:GO:0021784; P:GO:0021793; P:GO:0021960; P:GO:0045664; P:GO:0048485; P:GO:0048841; P:GO:0050767; P:GO:0050770; P:GO:0050923; P:GO:1902287; P:GO:1902667; F:GO:0017154; C:GO:0002116; C:GO:0005886	P:regulation of cell morphogenesis involved in differentiation; P:facial nerve structural organization; P:glossopharyngeal nerve morphogenesis; P:trigeminal nerve structural organization; P:vagus nerve morphogenesis; P:postganglionic parasympathetic fiber development; P:chemorepulsion of branchiomotor axon; P:anterior commissure morphogenesis; P:regulation of neuron differentiation; P:sympathetic…	NA	NA
jg524	1	713.766	5.89859e-35	neuronal cell adhesion molecule a isoform X1	3912	P:GO:0000132; P:GO:0001525; P:GO:0001764; P:GO:0003384; P:GO:0007156; P:GO:0007158; P:GO:0007173; P:GO:0007413; P:GO:0007416; P:GO:0007560; P:GO:0008045; P:GO:0008049; P:GO:0008050; P:GO:0008104; P:GO:0008366; P:GO:0009792; P:GO:0016319; P:GO:0016338; P:GO:0016339; P:GO:0019227; P:GO:0019991; P:GO:0021682; P:GO:0030516; P:GO:0031290; P:GO:0033563; P:GO:0033564; P:GO:0034113; P:GO:0035011; P:GO:00…	P:establishment of mitotic spindle orientation; P:angiogenesis; P:neuron migration; P:apical constriction involved in gastrulation; P:homophilic cell adhesion via plasma membrane adhesion molecules; P:neuron cell-cell adhesion; P:epidermal growth factor receptor signaling pathway; P:axonal fasciculation; P:synapse assembly; P:imaginal disc morphogenesis; P:motor neuron axon guidance; P:male court…	NA	NA
jg551	1	154.904	1.12704e-59	glutamate receptor, metabotropic 8a	1557	P:GO:0007186; P:GO:0007187; P:GO:0007196; P:GO:0007601; P:GO:0010884; P:GO:0046928; P:GO:0050966; P:GO:0051966; P:GO:0060341; P:GO:1901214; F:GO:0001642; F:GO:0004930; C:GO:0005886; C:GO:0005887; C:GO:0016021; C:GO:0042734; C:GO:0043005; C:GO:0043025; C:GO:0045211	P:G protein-coupled receptor signaling pathway; P:G protein-coupled receptor signaling pathway, coupled to cyclic nucleotide second messenger; P:adenylate cyclase-inhibiting G protein-coupled glutamate receptor signaling pathway; P:visual perception; P:positive regulation of lipid storage; P:regulation of neurotransmitter secretion; P:detection of mechanical stimulus involved in sensory perceptio…	NA	NA
jg553	1	468.842	3.97919e-31	prosaposin receptor GPR37b	1866	P:GO:0001934; P:GO:0006805; P:GO:0007186; P:GO:0007187; P:GO:0007193; P:GO:0031987; P:GO:0042416; P:GO:0043410; P:GO:0045964; P:GO:0097164; P:GO:1900408; P:GO:1903206; P:GO:2001039; F:GO:0004930; F:GO:0008528; F:GO:0030544; F:GO:0031625; F:GO:0036505; F:GO:0042277; C:GO:0000151; C:GO:0005783; C:GO:0005886; C:GO:0005887; C:GO:0016021; C:GO:0043235	P:positive regulation of protein phosphorylation; P:xenobiotic metabolic process; P:G protein-coupled receptor signaling pathway; P:G protein-coupled receptor signaling pathway, coupled to cyclic nucleotide second messenger; P:adenylate cyclase-inhibiting G protein-coupled receptor signaling pathway; P:locomotion involved in locomotory behavior; P:dopamine biosynthetic process; P:positive regulat…	NA	NA
jg591	1	676.789	3.3405e-14	transcription factor SOX-5 isoform X1	2328	P:GO:0001701; P:GO:0010628; P:GO:0010629; P:GO:0021953; P:GO:0032332; P:GO:0036445; P:GO:0045823; P:GO:0045892; P:GO:0045944; P:GO:0048709; P:GO:0050767; P:GO:0055059; P:GO:0060164; P:GO:0071560; P:GO:0072089; P:GO:0098722; P:GO:2000741; F:GO:0000976; F:GO:0000981; F:GO:0046982; C:GO:0005634; C:GO:0005667	P:in utero embryonic development; P:positive regulation of gene expression; P:negative regulation of gene expression; P:central nervous system neuron differentiation; P:positive regulation of chondrocyte differentiation; P:neuronal stem cell division; P:positive regulation of heart contraction; P:negative regulation of transcription, DNA-templated; P:positive regulation of transcription by RNA po…	NA	NA
jg605	1	222.282	4.91341e-26	proton myo-inositol cotransporter-like	1965	P:GO:0015798; P:GO:0046323; P:GO:0055085; P:GO:1902600; F:GO:0005351; F:GO:0005355; F:GO:0005366; F:GO:0022857; C:GO:0005886; C:GO:0016021	P:myo-inositol transport; P:glucose import; P:transmembrane transport; P:proton transmembrane transport; F:carbohydrate:proton symporter activity; F:glucose transmembrane transporter activity; F:myo-inositol:proton symporter activity; F:transmembrane transporter activity; C:plasma membrane; C:integral component of membrane	EC:7	Translocases
jg607	1	509.913	1.01655e-08	ATP-binding cassette sub-family D member 2-like	2208	P:GO:0000038; P:GO:0006635; P:GO:0009617; P:GO:0015718; P:GO:0015909; P:GO:0032000; P:GO:0042760; P:GO:0051704; P:GO:0055085; F:GO:0005324; F:GO:0005524; F:GO:0042803; F:GO:0140359; C:GO:0005777; C:GO:0005778; C:GO:0005829; C:GO:0016021	P:very long-chain fatty acid metabolic process; P:fatty acid beta-oxidation; P:response to bacterium; P:monocarboxylic acid transport; P:long-chain fatty acid transport; P:positive regulation of fatty acid beta-oxidation; P:very long-chain fatty acid catabolic process; P:multi-organism process; P:transmembrane transport; F:long-chain fatty acid transporter activity; F:ATP binding; F:protein homod…	EC:7	Translocases
jg608	1	820.806	2.83846e-09	kinesin-like protein KIF21A isoform X1	4785	P:GO:0007018; F:GO:0003777; F:GO:0016887; C:GO:0005829; C:GO:0005871; C:GO:0005886	P:microtubule-based movement; F:microtubule motor activity; F:ATP hydrolysis activity; C:cytosol; C:kinesin complex; C:plasma membrane	EC:3.6.1; EC:3.6; EC:3	Acting on acid anhydrides; Acting on acid anhydrides; Hydrolases
jg664	1	469.485	3.20617e-07	striatin-interacting protein 1 homolog isoform X1	2520	P:GO:0000226; P:GO:0007029; P:GO:0007032; P:GO:0008360; P:GO:0016477; P:GO:0035331; P:GO:0045886; P:GO:0048675; P:GO:0060562; P:GO:2001137; C:GO:0005783; C:GO:0005829; C:GO:0090443; C:GO:0098793	P:microtubule cytoskeleton organization; P:endoplasmic reticulum organization; P:endosome organization; P:regulation of cell shape; P:cell migration; P:negative regulation of hippo signaling; P:negative regulation of synaptic assembly at neuromuscular junction; P:axon extension; P:epithelial tube morphogenesis; P:positive regulation of endocytic recycling; C:endoplasmic reticulum; C:cytosol; C:FA…	NA	NA
jg673	1	814.908	4.87168e-124	leucine-rich repeat neuronal protein 3	2130	P:GO:0001934; P:GO:0051965; F:GO:0044877; C:GO:0005615; C:GO:0005886; C:GO:0016021; C:GO:0030131	P:positive regulation of protein phosphorylation; P:positive regulation of synapse assembly; F:protein-containing complex binding; C:extracellular space; C:plasma membrane; C:integral component of membrane; C:clathrin adaptor complex	NA	NA
jg678	1	1264.16	4.97862e-08	dedicator of cytokinesis protein 4b isoform X2	5934	P:GO:0000132; P:GO:0007264; P:GO:0007369; P:GO:0007417; P:GO:0045466; P:GO:0050790; P:GO:0060326; P:GO:0070986; P:GO:0090630; P:GO:0098657; P:GO:1901076; P:GO:1902742; P:GO:1903356; P:GO:1903523; P:GO:1904694; P:GO:1904754; F:GO:0005085; F:GO:0005096; F:GO:0017124; F:GO:0030165; F:GO:0030971; F:GO:0031267; C:GO:0005730; C:GO:0005737; C:GO:0005794; C:GO:0005829; C:GO:0005886; C:GO:0032045; C:GO:00…	P:establishment of mitotic spindle orientation; P:small GTPase mediated signal transduction; P:gastrulation; P:central nervous system development; P:R7 cell differentiation; P:regulation of catalytic activity; P:cell chemotaxis; P:left/right axis specification; P:activation of GTPase activity; P:import into cell; P:positive regulation of engulfment of apoptotic cell; P:apoptotic process involved …	NA	NA
jg685	1	785.654	1.23478e-64	forkhead box protein P2 isoform X1	2319	P:GO:0006357; P:GO:0009653; P:GO:0030154; P:GO:0035106; P:GO:0040011; P:GO:0045433; F:GO:0000981; C:GO:0005634	P:regulation of transcription by RNA polymerase II; P:anatomical structure morphogenesis; P:cell differentiation; P:operant conditioning; P:locomotion; P:male courtship behavior, veined wing generated song production; F:DNA-binding transcription factor activity, RNA polymerase II-specific; C:nucleus	NA	NA
jg702	1	335.452	6.65383e-16	cyclin-dependent kinase 17	1728	P:GO:0006468; F:GO:0004672; F:GO:0005524; C:GO:0005634; C:GO:0005737	P:protein phosphorylation; F:protein kinase activity; F:ATP binding; C:nucleus; C:cytoplasm	EC:2.7.1; EC:2.7; EC:2; EC:2.7.11.22	Transferring phosphorus-containing groups; Transferring phosphorus-containing groups; Transferases; Cyclin-dependent kinase
jg723	1	534.034	1.02058e-10	receptor-type tyrosine-protein phosphatase zeta isoform X1	5988	P:GO:0002244; P:GO:0007413; P:GO:0007415; P:GO:0008045; P:GO:0008285; P:GO:0008542; P:GO:0010769; P:GO:0010812; P:GO:0014015; P:GO:0019221; P:GO:0021766; P:GO:0035335; P:GO:0045665; P:GO:0045666; P:GO:0048146; P:GO:0048709; P:GO:0048814; P:GO:0050731; P:GO:0050768; P:GO:0070445; P:GO:1900006; P:GO:1900149; P:GO:1901216; P:GO:2000171; P:GO:2001224; F:GO:0004725; F:GO:0005001; F:GO:0017134; C:GO:00…	P:hematopoietic progenitor cell differentiation; P:axonal fasciculation; P:defasciculation of motor neuron axon; P:motor neuron axon guidance; P:negative regulation of cell population proliferation; P:visual learning; P:regulation of cell morphogenesis involved in differentiation; P:negative regulation of cell-substrate adhesion; P:positive regulation of gliogenesis; P:cytokine-mediated signaling…	EC:3.1; EC:3.1.3.48; EC:3; EC:3.1.3	Acting on ester bonds; Protein-tyrosine-phosphatase; Hydrolases; Acting on ester bonds
jg768	1	187.622	1.75246e-07	---NA---	255	NA	NA	NA	NA
jg775	1	226.146	2.84004e-37	pleckstrin homology-like domain family A member 1	462	P:GO:0000086; P:GO:0021879; P:GO:0043065; P:GO:0045210; F:GO:1901981; C:GO:0005730; C:GO:0005737; C:GO:0005829	P:G2/M transition of mitotic cell cycle; P:forebrain neuron differentiation; P:positive regulation of apoptotic process; P:FasL biosynthetic process; F:phosphatidylinositol phosphate binding; C:nucleolus; C:cytoplasm; C:cytosol	NA	NA
jg817	1	166.811	1.57828e-21	protein bicaudal D homolog 1-like isoform X1	3522	P:GO:0006396; P:GO:0008298; P:GO:0009653; P:GO:0016032; P:GO:0022618; P:GO:0034063; P:GO:0044403; P:GO:0048260; P:GO:0051704; P:GO:0070507; P:GO:0072385; P:GO:0072393; P:GO:1900275; P:GO:1900276; P:GO:1900737; P:GO:1904781; F:GO:0005200; F:GO:0008093; F:GO:0019901; F:GO:0031267; F:GO:0031871; F:GO:0034452; F:GO:0045505; F:GO:0070840; C:GO:0005802; C:GO:0005813; C:GO:0005829; C:GO:0016020; C:GO:00…	P:RNA processing; P:intracellular mRNA localization; P:anatomical structure morphogenesis; P:viral process; P:ribonucleoprotein complex assembly; P:stress granule assembly; P:biological process involved in symbiotic interaction; P:positive regulation of receptor-mediated endocytosis; P:multi-organism process; P:regulation of microtubule cytoskeleton organization; P:minus-end-directed organelle tr…	NA	NA
jg839	1	324.977	7.81282e-65	LMO3 protein	567	P:GO:0001933; P:GO:0035360; P:GO:0045600; P:GO:0070373; P:GO:2000324; F:GO:0046872; C:GO:0005737	P:negative regulation of protein phosphorylation; P:positive regulation of peroxisome proliferator activated receptor signaling pathway; P:positive regulation of fat cell differentiation; P:negative regulation of ERK1 and ERK2 cascade; P:positive regulation of glucocorticoid receptor signaling pathway; F:metal ion binding; C:cytoplasm	NA	NA
jg866	1	391.838	1.36169e-19	sorting nexin-4-like	1308	P:GO:0002888; P:GO:0006897; P:GO:0015031; P:GO:0015833; P:GO:0016050; P:GO:0032388; P:GO:0032456; P:GO:0051590; P:GO:0098657; P:GO:1903595; F:GO:0005154; F:GO:0005158; F:GO:0035091; F:GO:0043168; F:GO:1990459; F:GO:1990460; C:GO:0005868; C:GO:0005886; C:GO:0019898; C:GO:0031201; C:GO:0031901	P:positive regulation of myeloid leukocyte mediated immunity; P:endocytosis; P:protein transport; P:peptide transport; P:vesicle organization; P:positive regulation of intracellular transport; P:endocytic recycling; P:positive regulation of neurotransmitter transport; P:import into cell; P:positive regulation of histamine secretion by mast cell; F:epidermal growth factor receptor binding; F:insul…	NA	NA
jg895	1	410.252	8.1248e-30	pleckstrin homology domain-containing family A member 5-like isoform X13	2157	P:GO:0019233	P:sensory perception of pain	NA	NA
jg900	1	970.464	4.08619e-07	muskelin isoform X2	1905	P:GO:0001556; P:GO:0001952; P:GO:0007165; P:GO:0008360; P:GO:0031532; P:GO:0051128; F:GO:0042802; C:GO:0001726; C:GO:0005829; C:GO:0005938; C:GO:0099568	P:oocyte maturation; P:regulation of cell-matrix adhesion; P:signal transduction; P:regulation of cell shape; P:actin cytoskeleton reorganization; P:regulation of cellular component organization; F:identical protein binding; C:ruffle; C:cytosol; C:cell cortex; C:cytoplasmic region	NA	NA
jg26076	1	2204.73	2.91125e-28	enoyl-CoA delta isomerase 2, mitochondrial isoform X1	939	P:GO:0006625; P:GO:0015833; P:GO:0033540; P:GO:0050829; P:GO:0051704; F:GO:0000062; F:GO:0004165; F:GO:0005102; F:GO:0016853; C:GO:0005654; C:GO:0005739; C:GO:0005782; C:GO:0005829	P:protein targeting to peroxisome; P:peptide transport; P:fatty acid beta-oxidation using acyl-CoA oxidase; P:defense response to Gram-negative bacterium; P:multi-organism process; F:fatty-acyl-CoA binding; F:dodecenoyl-CoA delta-isomerase activity; F:signaling receptor binding; F:isomerase activity; C:nucleoplasm; C:mitochondrion; C:peroxisomal matrix; C:cytosol	EC:5.3; EC:5; EC:5.3.3.8; EC:5.3.3	Intramolecular oxidoreductases; Isomerases; Delta(3)-Delta(2)-enoyl-CoA isomerase; Intramolecular oxidoreductases
jg26101	1	610.702	1.09221e-48	neuritin	432	P:GO:0007399; P:GO:0007409; P:GO:1990138; F:GO:0042803; F:GO:0046982; C:GO:0005615; C:GO:0016020; C:GO:0032281; C:GO:0046658	P:nervous system development; P:axonogenesis; P:neuron projection extension; F:protein homodimerization activity; F:protein heterodimerization activity; C:extracellular space; C:membrane; C:AMPA glutamate receptor complex; C:anchored component of plasma membrane	NA	NA
jg26106	1	465.104	1.86937e-46	clavesin-1-like	981	P:GO:0007040; F:GO:0080025; C:GO:0000139; C:GO:0005802; C:GO:0030136; C:GO:0031901; C:GO:0032588	P:lysosome organization; F:phosphatidylinositol-3,5-bisphosphate binding; C:Golgi membrane; C:trans-Golgi network; C:clathrin-coated vesicle; C:early endosome membrane; C:trans-Golgi network membrane	NA	NA
jg26144	1	1104.6	1.06939e-20	pyruvate dehydrogenase E1 subunit alpha 1b isoform X1	1359	P:GO:0006086; P:GO:0006099; P:GO:0006101; P:GO:0006805; P:GO:0016999; P:GO:0046496; P:GO:0061732; F:GO:0004739; F:GO:0034604; C:GO:0005730; C:GO:0005967; C:GO:0043209; C:GO:0043231	P:acetyl-CoA biosynthetic process from pyruvate; P:tricarboxylic acid cycle; P:citrate metabolic process; P:xenobiotic metabolic process; P:antibiotic metabolic process; P:nicotinamide nucleotide metabolic process; P:mitochondrial acetyl-CoA biosynthetic process from pyruvate; F:pyruvate dehydrogenase (acetyl-transferring) activity; F:pyruvate dehydrogenase (NAD+) activity; C:nucleolus; C:mitocho…	EC:1.2; EC:1; EC:1.2.4; EC:1.2.4.1; EC:1.2.1	Acting on the aldehyde or oxo group of donors; Oxidoreductases; Acting on the aldehyde or oxo group of donors; Pyruvate dehydrogenase (acetyl-transferring); Acting on the aldehyde or oxo group of donors
jg26150	1	1126.1	8.71665e-16	MAP7 domain-containing protein 2-like isoform X2	1923	NA	NA	NA	NA
jg26151	1	1982.91	1.05486e-11	BCLAF1 and THRAP3 family member 3	2241	P:GO:0000226; C:GO:0015630	P:microtubule cytoskeleton organization; C:microtubule cytoskeleton	NA	NA
jg26204	1	579.389	1.08139e-159	cadherin-10a	2343	P:GO:0007156; P:GO:0007219; P:GO:0007416; P:GO:0008585; P:GO:0016339; P:GO:0034332; P:GO:0099560; F:GO:0005509; F:GO:0042802; F:GO:0098641; C:GO:0005886; C:GO:0016021; C:GO:0030424; C:GO:0030425; C:GO:0098686; C:GO:0099055; C:GO:0099056	P:homophilic cell adhesion via plasma membrane adhesion molecules; P:Notch signaling pathway; P:synapse assembly; P:female gonad development; P:calcium-dependent cell-cell adhesion via plasma membrane cell adhesion molecules; P:adherens junction organization; P:synaptic membrane adhesion; F:calcium ion binding; F:identical protein binding; F:cadherin binding involved in cell-cell adhesion; C:plas…	NA	NA
jg26206	1	335.736	4.01921e-120	cadherin-12-like isoform X1	2412	P:GO:0007156; P:GO:0034332; F:GO:0005509; C:GO:0005886; C:GO:0016021	P:homophilic cell adhesion via plasma membrane adhesion molecules; P:adherens junction organization; F:calcium ion binding; C:plasma membrane; C:integral component of membrane	NA	NA
jg26207	1	357.099	2.42229e-57	cadherin-18	2391	P:GO:0007156; P:GO:0034332; F:GO:0005509; C:GO:0005886; C:GO:0016021	P:homophilic cell adhesion via plasma membrane adhesion molecules; P:adherens junction organization; F:calcium ion binding; C:plasma membrane; C:integral component of membrane	NA	NA
jg26215	1	1072.73	4.25955e-08	enhancer of polycomb homolog 1-like isoform X1	2325	P:GO:0000122; P:GO:0010628; P:GO:0043486; P:GO:0043967; P:GO:0043968; P:GO:0045814; P:GO:0045944; P:GO:0051155; P:GO:0070317; P:GO:0070983; C:GO:0000228; C:GO:0005700; C:GO:0005725; C:GO:0031965; C:GO:0032777	P:negative regulation of transcription by RNA polymerase II; P:positive regulation of gene expression; P:histone exchange; P:histone H4 acetylation; P:histone H2A acetylation; P:negative regulation of gene expression, epigenetic; P:positive regulation of transcription by RNA polymerase II; P:positive regulation of striated muscle cell differentiation; P:negative regulation of G0 to G1 transition;…	NA	NA
jg26218	1	639.658	1.87179e-92	dipeptidyl aminopeptidase-like protein 6 isoform X3	2397	P:GO:0006508; P:GO:0019228; P:GO:0065009; P:GO:1901381; P:GO:1903078; F:GO:0004177; F:GO:0008239; F:GO:0015459; C:GO:0008076; C:GO:0009986; C:GO:0043025	P:proteolysis; P:neuronal action potential; P:regulation of molecular function; P:positive regulation of potassium ion transmembrane transport; P:positive regulation of protein localization to plasma membrane; F:aminopeptidase activity; F:dipeptidyl-peptidase activity; F:potassium channel regulator activity; C:voltage-gated potassium channel complex; C:cell surface; C:neuronal cell body	EC:3.4.11; EC:3.4; EC:3.4.14.1; EC:3; EC:3.4.14.5; EC:3.4.14.4; EC:3.4.14.2	Acting on peptide bonds (peptidases); Acting on peptide bonds (peptidases); Dipeptidyl-peptidase I; Hydrolases; Dipeptidyl-peptidase IV; Dipeptidyl-peptidase III; Dipeptidyl-peptidase II
jg26239	1	2868.33	1.23449e-08	rho GTPase-activating protein 21 isoform X1	6207	P:GO:0007266; P:GO:0007480; P:GO:0008104; P:GO:0010470; P:GO:0043547; F:GO:0005096; F:GO:0005515; C:GO:0030054	P:Rho protein signal transduction; P:imaginal disc-derived leg morphogenesis; P:protein localization; P:regulation of gastrulation; P:positive regulation of GTPase activity; F:GTPase activator activity; F:protein binding; C:cell junction	NA	NA
jg26255	1	1202.79	3.15931e-108	glutamate decarboxylase 2	1758	P:GO:0006105; P:GO:0006540; P:GO:0006805; P:GO:0007268; P:GO:0009449; P:GO:0042136; F:GO:0004351; F:GO:0016595; F:GO:0016831; F:GO:0030170; F:GO:0046982; C:GO:0005829; C:GO:0005886; C:GO:0030424; C:GO:0030672; C:GO:0031225; C:GO:0048471; C:GO:0060077; C:GO:0061202	P:succinate metabolic process; P:glutamate decarboxylation to succinate; P:xenobiotic metabolic process; P:chemical synaptic transmission; P:gamma-aminobutyric acid biosynthetic process; P:neurotransmitter biosynthetic process; F:glutamate decarboxylase activity; F:glutamate binding; F:carboxy-lyase activity; F:pyridoxal phosphate binding; F:protein heterodimerization activity; C:cytosol; C:plasm…	EC:4.1.1; EC:4.1.1.15; EC:4.1; EC:4	Carbon-carbon lyases; Glutamate decarboxylase; Carbon-carbon lyases; Lyases
jg26270	1	271.813	5.19222e-58	RNA-binding Raly-like protein isoform X2	657	NA	NA	NA	NA
jg26328	1	2455.66	5.57435e-56	arf-GAP with SH3 domain, ANK repeat and PH domain-containing protein 1 isoform X2	3423	P:GO:0001745; P:GO:0043547; P:GO:0060341; P:GO:1903358; P:GO:1903829; P:GO:1990386; F:GO:0005096; F:GO:0005515; F:GO:0043168; F:GO:0046872; F:GO:1901981; C:GO:0005737; C:GO:0045177	P:compound eye morphogenesis; P:positive regulation of GTPase activity; P:regulation of cellular localization; P:regulation of Golgi organization; P:positive regulation of protein localization; P:mitotic cleavage furrow ingression; F:GTPase activator activity; F:protein binding; F:anion binding; F:metal ion binding; F:phosphatidylinositol phosphate binding; C:cytoplasm; C:apical part of cell	NA	NA
jg26373	1	512.895	2.5531e-51	voltage-dependent L-type calcium channel subunit beta-2a isoform X2	2058	P:GO:0007268; P:GO:0007528; P:GO:0016322; P:GO:0019722; P:GO:0040017; P:GO:0061199; P:GO:1901385; F:GO:0008331; F:GO:0022839; C:GO:0005891; C:GO:0048786	P:chemical synaptic transmission; P:neuromuscular junction development; P:neuron remodeling; P:calcium-mediated signaling; P:positive regulation of locomotion; P:striated muscle contraction involved in embryonic body morphogenesis; P:regulation of voltage-gated calcium channel activity; F:high voltage-gated calcium channel activity; F:ion gated channel activity; C:voltage-gated calcium channel co…	EC:7	Translocases
jg26389	1	878.92	5.7087e-83	receptor-type tyrosine-protein phosphatase N2	1983	P:GO:0007165; P:GO:0007269; P:GO:0034260; P:GO:0035335; P:GO:0035773; P:GO:0043312; P:GO:0048565; P:GO:0051046; F:GO:0004725; F:GO:0005001; C:GO:0005788; C:GO:0005887; C:GO:0016021; C:GO:0030141; C:GO:0030658; C:GO:0030672; C:GO:0043195; C:GO:0043235; C:GO:0045202; C:GO:0101003	P:signal transduction; P:neurotransmitter secretion; P:negative regulation of GTPase activity; P:peptidyl-tyrosine dephosphorylation; P:insulin secretion involved in cellular response to glucose stimulus; P:neutrophil degranulation; P:digestive tract development; P:regulation of secretion; F:protein tyrosine phosphatase activity; F:transmembrane receptor protein tyrosine phosphatase activity; C:e…	EC:3.1; EC:3.1.3.48; EC:3; EC:3.1.3	Acting on ester bonds; Protein-tyrosine-phosphatase; Hydrolases; Acting on ester bonds
jg26399	1	2776.69	1.0333e-10	RNA-binding protein 33 isoform X2	3351	F:GO:0003676	F:nucleic acid binding	NA	NA
jg26422	1	694.602	3.85615e-62	short transient receptor potential channel 1	2391	P:GO:0001525; P:GO:0001570; P:GO:0006828; P:GO:0007603; P:GO:0007605; P:GO:0007628; P:GO:0019722; P:GO:0042438; P:GO:0046541; P:GO:0046847; P:GO:0050884; P:GO:0050908; P:GO:0051281; P:GO:0051592; P:GO:0070588; P:GO:0071454; P:GO:0071456; P:GO:1903779; F:GO:0005262; F:GO:0005516; F:GO:0008381; F:GO:0010461; F:GO:0015279; F:GO:0042802; F:GO:0044325; F:GO:0046982; F:GO:0070679; C:GO:0005887; C:GO:00…	P:angiogenesis; P:vasculogenesis; P:manganese ion transport; P:phototransduction, visible light; P:sensory perception of sound; P:adult walking behavior; P:calcium-mediated signaling; P:melanin biosynthetic process; P:saliva secretion; P:filopodium assembly; P:neuromuscular process controlling posture; P:detection of light stimulus involved in visual perception; P:positive regulation of release o…	EC:7	Translocases
jg26423	1	596.839	1.46722e-20	carbohydrate sulfotransferase 2	1398	P:GO:0005975; P:GO:0006044; P:GO:0006954; P:GO:0007275; P:GO:0018146; P:GO:0043436; F:GO:0001517; F:GO:0008146; C:GO:0000139; C:GO:0005802; C:GO:0016021; C:GO:0031228	P:carbohydrate metabolic process; P:N-acetylglucosamine metabolic process; P:inflammatory response; P:multicellular organism development; P:keratan sulfate biosynthetic process; P:oxoacid metabolic process; F:N-acetylglucosamine 6-O-sulfotransferase activity; F:sulfotransferase activity; C:Golgi membrane; C:trans-Golgi network; C:integral component of membrane; C:intrinsic component of Golgi memb…	EC:2.8.2; EC:2; EC:2.8	Transferring sulfur-containing groups; Transferases; Transferring sulfur-containing groups
jg26439	1	688.805	1.32943e-49	solute carrier family 35 member G2b	1251	C:GO:0005794; C:GO:0005887; C:GO:0016021	C:Golgi apparatus; C:integral component of plasma membrane; C:integral component of membrane	NA	NA
jg26538	1	323.132	8.63018e-26	class E basic helix-loop-helix protein 22	807	P:GO:0006357; P:GO:0008045; P:GO:0022008; F:GO:0000981; F:GO:0046983; C:GO:0005634	P:regulation of transcription by RNA polymerase II; P:motor neuron axon guidance; P:neurogenesis; F:DNA-binding transcription factor activity, RNA polymerase II-specific; F:protein dimerization activity; C:nucleus	NA	NA
jg26586	1	529.36	9.73238e-104	rab effector MyRIP isoform X1	3288	P:GO:0006886; P:GO:0030050; P:GO:0032024; F:GO:0003779; F:GO:0008270; F:GO:0017022; F:GO:0031267; F:GO:0051018; C:GO:0000145; C:GO:0001750; C:GO:0016324; C:GO:0030667; C:GO:0030864; C:GO:0031045; C:GO:0042470; C:GO:0045202; C:GO:0048471; C:GO:0099568	P:intracellular protein transport; P:vesicle transport along actin filament; P:positive regulation of insulin secretion; F:actin binding; F:zinc ion binding; F:myosin binding; F:small GTPase binding; F:protein kinase A binding; C:exocyst; C:photoreceptor outer segment; C:apical plasma membrane; C:secretory granule membrane; C:cortical actin cytoskeleton; C:dense core granule; C:melanosome; C:syna…	NA	NA
jg26596	1	440.371	1.86492e-56	choline-phosphate cytidylyltransferase B isoform X1	1086	P:GO:0001541; P:GO:0006657; P:GO:0006897; P:GO:0007283; P:GO:0007476; P:GO:0008340; P:GO:0042067; P:GO:0048477; P:GO:0097164; P:GO:0098657; P:GO:1904116; F:GO:0004105; C:GO:0005634; C:GO:0005789	P:ovarian follicle development; P:CDP-choline pathway; P:endocytosis; P:spermatogenesis; P:imaginal disc-derived wing morphogenesis; P:determination of adult lifespan; P:establishment of ommatidial planar polarity; P:oogenesis; P:ammonium ion metabolic process; P:import into cell; P:response to vasopressin; F:choline-phosphate cytidylyltransferase activity; C:nucleus; C:endoplasmic reticulum memb…	EC:2.7; EC:2; EC:2.7.7.15; EC:2.7.7	Transferring phosphorus-containing groups; Transferases; Choline-phosphate cytidylyltransferase; Transferring phosphorus-containing groups
jg26610	1	164.174	3.5456e-72	neuropilin and tolloid-like protein 1 isoform X2	1233	P:GO:0048168; C:GO:0016021	P:regulation of neuronal synaptic plasticity; C:integral component of membrane	NA	NA
jg26613	1	397.124	7.12917e-66	cerebellin-2	606	P:GO:0051965; C:GO:0005615	P:positive regulation of synapse assembly; C:extracellular space	NA	NA
jg26617	1	101.534	1.8915e-36	docking protein 6	993	P:GO:0007411; C:GO:0005829	P:axon guidance; C:cytosol	NA	NA
jg26650	1	605.778	1.51439e-15	phosphatidylinositol 5-phosphate 4-kinase type-2 alpha isoform X1	1332	P:GO:0014066; P:GO:0016310; P:GO:0035855; P:GO:0046834; P:GO:0046854; P:GO:0048634; P:GO:2000786; F:GO:0005524; F:GO:0016308; F:GO:0016309; F:GO:0052811; C:GO:0005654; C:GO:0005776; C:GO:0005829; C:GO:0005886	P:regulation of phosphatidylinositol 3-kinase signaling; P:phosphorylation; P:megakaryocyte development; P:lipid phosphorylation; P:phosphatidylinositol phosphate biosynthetic process; P:regulation of muscle organ development; P:positive regulation of autophagosome assembly; F:ATP binding; F:1-phosphatidylinositol-4-phosphate 5-kinase activity; F:1-phosphatidylinositol-5-phosphate 4-kinase activi…	EC:2.7.1; EC:2.7; EC:2; EC:2.7.1.149; EC:2.7.1.68	Transferring phosphorus-containing groups; Transferring phosphorus-containing groups; Transferases; 1-phosphatidylinositol-5-phosphate 4-kinase; 1-phosphatidylinositol-4-phosphate 5-kinase
jg26673	1	3272.29	6.2408e-44	zinc finger homeobox protein 4	6828	P:GO:0006357; P:GO:0007399; P:GO:0007476; F:GO:0000977; F:GO:0000981; F:GO:0003677; F:GO:0008270; C:GO:0005634	P:regulation of transcription by RNA polymerase II; P:nervous system development; P:imaginal disc-derived wing morphogenesis; F:RNA polymerase II transcription regulatory region sequence-specific DNA binding; F:DNA-binding transcription factor activity, RNA polymerase II-specific; F:DNA binding; F:zinc ion binding; C:nucleus	NA	NA
jg26675	1	1064.99	1.18096e-29	zinc finger homeobox protein 4	3567	P:GO:0006357; P:GO:0007399; P:GO:0007476; F:GO:0000977; F:GO:0000981; C:GO:0005634	P:regulation of transcription by RNA polymerase II; P:nervous system development; P:imaginal disc-derived wing morphogenesis; F:RNA polymerase II transcription regulatory region sequence-specific DNA binding; F:DNA-binding transcription factor activity, RNA polymerase II-specific; C:nucleus	NA	NA
jg26687	1	521.142	3.19797e-74	catenin delta-2 isoform X2	3906	P:GO:0001745; P:GO:0001763; P:GO:0007612; P:GO:0010172; P:GO:0032880; P:GO:0032956; P:GO:0034334; P:GO:0048167; P:GO:0060828; P:GO:0060997; P:GO:0098609; F:GO:0008013; F:GO:0045296; C:GO:0005634; C:GO:0005737; C:GO:0005813; C:GO:0005912; C:GO:0014069; C:GO:0016342; C:GO:0030054; C:GO:0043005; C:GO:0043204	P:compound eye morphogenesis; P:morphogenesis of a branching structure; P:learning; P:embryonic body morphogenesis; P:regulation of protein localization; P:regulation of actin cytoskeleton organization; P:adherens junction maintenance; P:regulation of synaptic plasticity; P:regulation of canonical Wnt signaling pathway; P:dendritic spine morphogenesis; P:cell-cell adhesion; F:beta-catenin binding…	NA	NA
jg26690	1	458.777	7.91209e-09	zinc finger C2HC domain-containing protein 1A isoform X1	945	NA	NA	NA	NA
jg26763	1	284.461	4.01841e-64	netrin-G1 isoform X1	1653	P:GO:0007409; P:GO:0099560; F:GO:0098632; C:GO:0005576; C:GO:0046658	P:axonogenesis; P:synaptic membrane adhesion; F:cell-cell adhesion mediator activity; C:extracellular region; C:anchored component of plasma membrane	NA	NA
jg26834	1	2485.25	1.14343e-51	neuropilin-1a isoform X1	2775	P:GO:0001525; P:GO:0001569; P:GO:0001666; P:GO:0001938; P:GO:0003148; P:GO:0006930; P:GO:0007229; P:GO:0007267; P:GO:0007411; P:GO:0007413; P:GO:0007508; P:GO:0009611; P:GO:0009887; P:GO:0010771; P:GO:0010976; P:GO:0014911; P:GO:0021612; P:GO:0021637; P:GO:0021649; P:GO:0021785; P:GO:0021824; P:GO:0021828; P:GO:0022035; P:GO:0030947; P:GO:0032489; P:GO:0035729; P:GO:0035767; P:GO:0036486; P:GO:00…	P:angiogenesis; P:branching involved in blood vessel morphogenesis; P:response to hypoxia; P:positive regulation of endothelial cell proliferation; P:outflow tract septum morphogenesis; P:substrate-dependent cell migration, cell extension; P:integrin-mediated signaling pathway; P:cell-cell signaling; P:axon guidance; P:axonal fasciculation; P:larval heart development; P:response to wounding; P:an…	EC:2.7.10.1; EC:2.7.1; EC:2.7; EC:2	Receptor protein-tyrosine kinase; Transferring phosphorus-containing groups; Transferring phosphorus-containing groups; Transferases
jg26888	1	401.271	5.9374e-143	V-set and transmembrane domain-containing protein 2A	711	P:GO:0010628; P:GO:0010884; P:GO:0065008; P:GO:0070352; P:GO:0071773; P:GO:0090336; F:GO:0042802; C:GO:0005576; C:GO:0005886; C:GO:0016021	P:positive regulation of gene expression; P:positive regulation of lipid storage; P:regulation of biological quality; P:positive regulation of white fat cell proliferation; P:cellular response to BMP stimulus; P:positive regulation of brown fat cell differentiation; F:identical protein binding; C:extracellular region; C:plasma membrane; C:integral component of membrane	NA	NA
jg26892	1	585.723	3.63418e-41	E3 ubiquitin-protein ligase HECW1	4980	P:GO:0016567; P:GO:0043161; P:GO:0090090; P:GO:1900424; F:GO:0004842; F:GO:0061630; C:GO:0005829	P:protein ubiquitination; P:proteasome-mediated ubiquitin-dependent protein catabolic process; P:negative regulation of canonical Wnt signaling pathway; P:regulation of defense response to bacterium; F:ubiquitin-protein transferase activity; F:ubiquitin protein ligase activity; C:cytosol	EC:2; EC:2.3.2.26	Transferases; HECT-type E3 ubiquitin transferase
jg26896	1	184.372	7.27901e-06	lanC-like protein 2	969	P:GO:0005975; P:GO:0009789; P:GO:0010629; P:GO:0045892; P:GO:1905959; F:GO:0005524; F:GO:0005525; F:GO:0010314; F:GO:0032266; F:GO:0032550; F:GO:0070273; C:GO:0005634; C:GO:0005829; C:GO:0005886; C:GO:0030864; C:GO:0099568	P:carbohydrate metabolic process; P:positive regulation of abscisic acid-activated signaling pathway; P:negative regulation of gene expression; P:negative regulation of transcription, DNA-templated; P:positive regulation of cellular response to alcohol; F:ATP binding; F:GTP binding; F:phosphatidylinositol-5-phosphate binding; F:phosphatidylinositol-3-phosphate binding; F:purine ribonucleoside bin…	NA	NA
jg26939	1	288.049	4.72813e-33	5'-AMP-activated protein kinase subunit gamma-2-like	1203	P:GO:0006629; P:GO:0006914; P:GO:0009267; P:GO:0030730; P:GO:0042595; P:GO:0042632; P:GO:0045787; F:GO:0019901; C:GO:0005634; C:GO:0005737	P:lipid metabolic process; P:autophagy; P:cellular response to starvation; P:sequestering of triglyceride; P:behavioral response to starvation; P:cholesterol homeostasis; P:positive regulation of cell cycle; F:protein kinase binding; C:nucleus; C:cytoplasm	NA	NA
jg26969	1	517.226	7.12949e-182	protein 4.1-like isoform X1	3246	P:GO:0007010; F:GO:0008092; C:GO:0110165	P:cytoskeleton organization; F:cytoskeletal protein binding; C:cellular anatomical entity	NA	NA
jg8248	1	1219.82	3.85813e-72	dihydropyrimidinase-related protein 2-like	1719	P:GO:0070997; P:GO:0097485; F:GO:0016810; C:GO:0005737	P:neuron death; P:neuron projection guidance; F:hydrolase activity, acting on carbon-nitrogen (but not peptide) bonds; C:cytoplasm	EC:3.5; EC:3	Acting on carbon-nitrogen bonds, other than peptide bonds; Hydrolases
jg8255	1	328.792	1.84382e-58	rho GTPase-activating protein 44-like	2787	P:GO:0002793; P:GO:0007165; P:GO:0007274; P:GO:0007480; P:GO:0010769; P:GO:0030837; P:GO:0035021; P:GO:0043547; P:GO:0045664; P:GO:0045887; P:GO:0048814; P:GO:0050767; P:GO:0060998; P:GO:0061001; P:GO:0098886; P:GO:0098887; P:GO:0099632; P:GO:1900144; P:GO:1990255; F:GO:0005096; F:GO:0005543; F:GO:0017124; F:GO:0031267; F:GO:0043168; C:GO:0005737; C:GO:0005829; C:GO:0014069; C:GO:0031256; C:GO:00…	P:positive regulation of peptide secretion; P:signal transduction; P:neuromuscular synaptic transmission; P:imaginal disc-derived leg morphogenesis; P:regulation of cell morphogenesis involved in differentiation; P:negative regulation of actin filament polymerization; P:negative regulation of Rac protein signal transduction; P:positive regulation of GTPase activity; P:regulation of neuron differe…	NA	NA
jg8258	1	618.43	3.17601e-20	nuclear distribution protein nudE-like 1-A isoform X1	1032	P:GO:0000132; P:GO:0001764; P:GO:0001833; P:GO:0002066; P:GO:0006508; P:GO:0007020; P:GO:0007052; P:GO:0007060; P:GO:0007080; P:GO:0007100; P:GO:0007294; P:GO:0007298; P:GO:0007399; P:GO:0008090; P:GO:0008286; P:GO:0021799; P:GO:0021955; P:GO:0030951; P:GO:0032418; P:GO:0033157; P:GO:0045666; P:GO:0045773; P:GO:0047496; P:GO:0048680; P:GO:0050775; P:GO:0051081; P:GO:0051298; P:GO:0051642; P:GO:00…	P:establishment of mitotic spindle orientation; P:neuron migration; P:inner cell mass cell proliferation; P:columnar/cuboidal epithelial cell development; P:proteolysis; P:microtubule nucleation; P:mitotic spindle organization; P:male meiosis chromosome segregation; P:mitotic metaphase plate congression; P:mitotic centrosome separation; P:germarium-derived oocyte fate determination; P:border foll…	EC:3.4; EC:3	Acting on peptide bonds (peptidases); Hydrolases
jg8272	1	407.25	1.80356e-11	BTB/POZ domain-containing protein KCTD2	819	P:GO:0043161; P:GO:0045187; P:GO:0051260; F:GO:0017022; F:GO:0042803; F:GO:0044877; F:GO:0097602; C:GO:0005622; C:GO:0031463	P:proteasome-mediated ubiquitin-dependent protein catabolic process; P:regulation of circadian sleep/wake cycle, sleep; P:protein homooligomerization; F:myosin binding; F:protein homodimerization activity; F:protein-containing complex binding; F:cullin family protein binding; C:intracellular anatomical structure; C:Cul3-RING ubiquitin ligase complex	NA	NA
jg8290	1	2276.91	1.30258e-79	protein FAM171A2 isoform X2	2487	C:GO:0016021	C:integral component of membrane	NA	NA
jg8296	1	431.432	8.02149e-52	SRC kinase signaling inhibitor 1 isoform X4	3732	P:GO:0030334; P:GO:0034446; P:GO:0061001	P:regulation of cell migration; P:substrate adhesion-dependent cell spreading; P:regulation of dendritic spine morphogenesis	NA	NA
jg8370	1	417.36	3.26856e-27	brain-specific angiogenesis inhibitor 1-associated protein 2-like isoform X2	1740	P:GO:0006897; P:GO:0007009; P:GO:0007266; P:GO:0007409; P:GO:0007420; P:GO:0008286; P:GO:0008360; P:GO:0009617; P:GO:0030838; P:GO:0031646; P:GO:0031670; P:GO:0032956; P:GO:0035418; P:GO:0038096; P:GO:0045666; P:GO:0048010; P:GO:0048167; P:GO:0050806; P:GO:0051017; P:GO:0051704; P:GO:0051764; P:GO:0061003; P:GO:0071364; P:GO:0071466; P:GO:0098657; P:GO:1900006; P:GO:1905232; P:GO:2000251; P:GO:20…	P:endocytosis; P:plasma membrane organization; P:Rho protein signal transduction; P:axonogenesis; P:brain development; P:insulin receptor signaling pathway; P:regulation of cell shape; P:response to bacterium; P:positive regulation of actin filament polymerization; P:positive regulation of nervous system process; P:cellular response to nutrient; P:regulation of actin cytoskeleton organization; P:…	NA	NA
jg8371	1	1184.19	3.2891e-74	serine/threonine-protein kinase LMTK1 isoform X1	4605	P:GO:0006468; F:GO:0004672; F:GO:0005524	P:protein phosphorylation; F:protein kinase activity; F:ATP binding	EC:2.7.1; EC:2.7.10.1; EC:2.7; EC:2	Transferring phosphorus-containing groups; Receptor protein-tyrosine kinase; Transferring phosphorus-containing groups; Transferases
jg8410	1	358.949	1.05251e-37	poly [ADP-ribose] polymerase tankyrase-2-like isoform X1	3990	P:GO:0000209; P:GO:0032212; P:GO:0040014; P:GO:0060249; P:GO:0070198; P:GO:0070212; P:GO:0070213; P:GO:0090263; P:GO:0090364; P:GO:1904355; P:GO:1904357; P:GO:2000060; F:GO:0003950; F:GO:0019899; F:GO:0097110; C:GO:0000228; C:GO:0000242; C:GO:0000781; C:GO:0005635; C:GO:0005829; C:GO:0048471	P:protein polyubiquitination; P:positive regulation of telomere maintenance via telomerase; P:regulation of multicellular organism growth; P:anatomical structure homeostasis; P:protein localization to chromosome, telomeric region; P:protein poly-ADP-ribosylation; P:protein auto-ADP-ribosylation; P:positive regulation of canonical Wnt signaling pathway; P:regulation of proteasome assembly; P:posit…	EC:2.4.2; EC:2.4; EC:2; EC:2.4.2.30	Glycosyltransferases; Glycosyltransferases; Transferases; NAD(+) ADP-ribosyltransferase
jg8496	1	875.053	8.79879e-68	chromobox protein homolog 1b isoform X1	666	P:GO:0000122; P:GO:0010847; P:GO:0031452; P:GO:0045798; P:GO:0045944; P:GO:2001251; F:GO:0003682; F:GO:0042803; F:GO:1990226; C:GO:0000228; C:GO:0001939; C:GO:0001940; C:GO:0005634; C:GO:0005654; C:GO:0005721; C:GO:0005819; C:GO:0010369	P:negative regulation of transcription by RNA polymerase II; P:regulation of chromatin assembly; P:negative regulation of heterochromatin assembly; P:negative regulation of chromatin assembly or disassembly; P:positive regulation of transcription by RNA polymerase II; P:negative regulation of chromosome organization; F:chromatin binding; F:protein homodimerization activity; F:histone methyltransf…	NA	NA
jg8505	1	755.337	3.89314e-51	cyclin-dependent kinase 5 activator 1 isoform X1	927	P:GO:0008045; P:GO:0008340; P:GO:0008344; P:GO:0010842; P:GO:0032147; P:GO:0035011; P:GO:0035881; P:GO:0045737; P:GO:0060059; P:GO:0070059; F:GO:0016301; F:GO:0061575; C:GO:0005886; C:GO:0016533; C:GO:0030425; C:GO:0030426; C:GO:0043025	P:motor neuron axon guidance; P:determination of adult lifespan; P:adult locomotory behavior; P:retina layer formation; P:activation of protein kinase activity; P:melanotic encapsulation of foreign target; P:amacrine cell differentiation; P:positive regulation of cyclin-dependent protein serine/threonine kinase activity; P:embryonic retina morphogenesis in camera-type eye; P:intrinsic apoptotic s…	EC:2.7.1; EC:2.7; EC:2	Transferring phosphorus-containing groups; Transferring phosphorus-containing groups; Transferases
jg8527	1	681.78	8.22183e-35	ADP-ribosylation factor-like protein 4D	606	P:GO:0002790; P:GO:0009306; F:GO:0003924; F:GO:0005525; C:GO:0005634; C:GO:0005737; C:GO:0005886	P:peptide secretion; P:protein secretion; F:GTPase activity; F:GTP binding; C:nucleus; C:cytoplasm; C:plasma membrane	EC:3.6.1; EC:3.6; EC:3	Acting on acid anhydrides; Acting on acid anhydrides; Hydrolases
jg8569	1	2637.35	3.19256e-22	protein TANC2 isoform X7	6249	P:GO:0001701; P:GO:0002066; P:GO:0007298; P:GO:0007520; P:GO:0045214; P:GO:0061327; F:GO:0008307; F:GO:0050839; C:GO:0005912; C:GO:0009986; C:GO:0030018	P:in utero embryonic development; P:columnar/cuboidal epithelial cell development; P:border follicle cell migration; P:myoblast fusion; P:sarcomere organization; P:anterior Malpighian tubule development; F:structural constituent of muscle; F:cell adhesion molecule binding; C:adherens junction; C:cell surface; C:Z disc	NA	NA
jg8581	1	1489.33	1.58617e-30	neurabin-2-like	2409	P:GO:0007399; P:GO:0042127; P:GO:0050804; P:GO:1905519; F:GO:0003779; F:GO:0008157; F:GO:0042043; F:GO:0051015; C:GO:0001725; C:GO:0005737; C:GO:0005856; C:GO:0030864; C:GO:0036062; C:GO:0048786; C:GO:0099568	P:nervous system development; P:regulation of cell population proliferation; P:modulation of chemical synaptic transmission; P:negative regulation of presynaptic active zone assembly; F:actin binding; F:protein phosphatase 1 binding; F:neurexin family protein binding; F:actin filament binding; C:stress fiber; C:cytoplasm; C:cytoskeleton; C:cortical actin cytoskeleton; C:presynaptic periactive zon…	NA	NA
jg8623	1	424.665	1.83268e-06	BRD4-interacting chromatin-remodeling complex-associated protein-like	2400	NA	NA	NA	NA
jg8627	1	1104.37	3.13956e-13	protein quaking-B isoform X5	951	P:GO:0000381; P:GO:0001570; P:GO:0007155; P:GO:0007284; P:GO:0007286; P:GO:0007420; P:GO:0007438; P:GO:0007475; P:GO:0007498; P:GO:0007521; P:GO:0007525; P:GO:0008016; P:GO:0008078; P:GO:0008347; P:GO:0010667; P:GO:0010976; P:GO:0014866; P:GO:0016203; P:GO:0030718; P:GO:0042552; P:GO:0042759; P:GO:0045214; P:GO:0045666; P:GO:0045995; P:GO:0048255; P:GO:0048714; P:GO:0061158; F:GO:0003723; F:GO:00…	P:regulation of alternative mRNA splicing, via spliceosome; P:vasculogenesis; P:cell adhesion; P:spermatogonial cell division; P:spermatid development; P:brain development; P:oenocyte development; P:apposition of dorsal and ventral imaginal disc-derived wing surfaces; P:mesoderm development; P:muscle cell fate determination; P:somatic muscle development; P:regulation of heart contraction; P:mesod…	NA	NA
jg8649	1	1606.43	5.57613e-33	E3 ubiquitin ligase RNF157 isoform X2	2001	P:GO:0016567; P:GO:0040027; P:GO:1903361; F:GO:0004842; F:GO:0008270; F:GO:0046872; C:GO:0031410	P:protein ubiquitination; P:negative regulation of vulval development; P:protein localization to basolateral plasma membrane; F:ubiquitin-protein transferase activity; F:zinc ion binding; F:metal ion binding; C:cytoplasmic vesicle	EC:2; EC:2.3.2.27	Transferases; RING-type E3 ubiquitin transferase
jg8664	1	2376.92	1.03716e-121	neurotrypsin-like	2784	P:GO:0006508; P:GO:0006897; F:GO:0004252; F:GO:0005044; C:GO:0005615; C:GO:0016020	P:proteolysis; P:endocytosis; F:serine-type endopeptidase activity; F:scavenger receptor activity; C:extracellular space; C:membrane	EC:3.4.21; EC:3.4; EC:3	Acting on peptide bonds (peptidases); Acting on peptide bonds (peptidases); Hydrolases
jg8675	1	582.281	4.14538e-59	inactive ubiquitin carboxyl-terminal hydrolase 54-like isoform X1	3633	P:GO:0010720; P:GO:0016318; P:GO:0016579; P:GO:0046672; P:GO:0051240; P:GO:2000026; P:GO:2000027; F:GO:0004843; F:GO:0008157	P:positive regulation of cell development; P:ommatidial rotation; P:protein deubiquitination; P:positive regulation of compound eye retinal cell programmed cell death; P:positive regulation of multicellular organismal process; P:regulation of multicellular organismal development; P:regulation of animal organ morphogenesis; F:thiol-dependent deubiquitinase; F:protein phosphatase 1 binding	EC:3.4; EC:3; EC:3.4.19; EC:3.4.19.12	Acting on peptide bonds (peptidases); Hydrolases; Acting on peptide bonds (peptidases); Ubiquitinyl hydrolase 1
jg8678	1	1176.6	1.42759e-64	synuclein, gamma b (breast cancer-specific protein 1) isoform X1	492	P:GO:0002118; P:GO:0002790; P:GO:0007165; P:GO:0007422; P:GO:0008344; P:GO:0009306; P:GO:0014059; P:GO:0036276; P:GO:0042220; P:GO:0046928; P:GO:0050808; P:GO:0051704; P:GO:0060341; P:GO:0060359; P:GO:0071464; P:GO:0072347; P:GO:1904307; P:GO:2001023; F:GO:0043014; F:GO:0048487; C:GO:0005815; C:GO:0005819; C:GO:0005886; C:GO:0043025; C:GO:0043679; C:GO:0048471	P:aggressive behavior; P:peptide secretion; P:signal transduction; P:peripheral nervous system development; P:adult locomotory behavior; P:protein secretion; P:regulation of dopamine secretion; P:response to antidepressant; P:response to cocaine; P:regulation of neurotransmitter secretion; P:synapse organization; P:multi-organism process; P:regulation of cellular localization; P:response to ammon…	NA	NA
jg8684	1	1193.96	4.6139e-25	protein kinase C epsilon type	2244	P:GO:0000165; P:GO:0006468; P:GO:0007218; P:GO:0007606; P:GO:0007635; P:GO:0008306; P:GO:0016079; P:GO:0035556; P:GO:0040024; P:GO:0046907; P:GO:0048009; P:GO:0048489; P:GO:0050893; P:GO:0050927; P:GO:0050975; P:GO:0097480; P:GO:1902074; P:GO:1990504; P:GO:2001024; F:GO:0004698; F:GO:0005524; F:GO:0106310; C:GO:0005737	P:MAPK cascade; P:protein phosphorylation; P:neuropeptide signaling pathway; P:sensory perception of chemical stimulus; P:chemosensory behavior; P:associative learning; P:synaptic vesicle exocytosis; P:intracellular signal transduction; P:dauer larval development; P:intracellular transport; P:insulin-like growth factor receptor signaling pathway; P:synaptic vesicle transport; P:sensory processing…	EC:2.7.1; EC:2.7.11.13; EC:2.7; EC:2	Transferring phosphorus-containing groups; Protein kinase C; Transferring phosphorus-containing groups; Transferases
jg8699	1	3938.02	5.1915e-89	neurexin 1a isoform X1	4455	P:GO:0001525; P:GO:0007157; P:GO:0007158; P:GO:0007269; P:GO:0007411; P:GO:0010628; P:GO:0010629; P:GO:0010739; P:GO:0016339; P:GO:0021707; P:GO:0023041; P:GO:0030534; P:GO:0031646; P:GO:0033138; P:GO:0035176; P:GO:0042297; P:GO:0045184; P:GO:0045743; P:GO:0050885; P:GO:0051490; P:GO:0051704; P:GO:0051897; P:GO:0051965; P:GO:0051968; P:GO:0070374; P:GO:0071277; P:GO:0071625; P:GO:0090126; P:GO:00…	P:angiogenesis; P:heterophilic cell-cell adhesion via plasma membrane cell adhesion molecules; P:neuron cell-cell adhesion; P:neurotransmitter secretion; P:axon guidance; P:positive regulation of gene expression; P:negative regulation of gene expression; P:positive regulation of protein kinase A signaling; P:calcium-dependent cell-cell adhesion via plasma membrane cell adhesion molecules; P:cereb…	NA	NA
jg8751	1	555.386	1.11069e-147	choline O-acetyltransferase-like	1902	P:GO:0001547; P:GO:0001666; P:GO:0006656; P:GO:0006805; P:GO:0007269; P:GO:0007274; P:GO:0007517; P:GO:0007529; P:GO:0007584; P:GO:0007613; P:GO:0007622; P:GO:0007628; P:GO:0008292; P:GO:0009636; P:GO:0016358; P:GO:0042446; P:GO:0043179; P:GO:0045471; P:GO:0046677; P:GO:0060416; P:GO:0097164; F:GO:0004102; F:GO:0016746; F:GO:0033265; F:GO:0042165; F:GO:0070405; C:GO:0005634; C:GO:0005829; C:GO:00…	P:antral ovarian follicle growth; P:response to hypoxia; P:phosphatidylcholine biosynthetic process; P:xenobiotic metabolic process; P:neurotransmitter secretion; P:neuromuscular synaptic transmission; P:muscle organ development; P:establishment of synaptic specificity at neuromuscular junction; P:response to nutrient; P:memory; P:rhythmic behavior; P:adult walking behavior; P:acetylcholine biosy…	EC:2.3; EC:2.3.1.6; EC:2; EC:2.3.1	Acyltransferases; Choline O-acetyltransferase; Transferases; Acyltransferases
jg8752	1	439.322	4.24712e-92	probable vesicular acetylcholine transporter-B	1569	P:GO:0006836; P:GO:0006855; P:GO:0007269; P:GO:0009410; P:GO:0015695; P:GO:0015844; P:GO:0042908; P:GO:0055085; P:GO:0061024; P:GO:0072488; P:GO:1901374; F:GO:0005277; F:GO:0008504; F:GO:0008519; F:GO:0042166; F:GO:0042562; F:GO:0042910; F:GO:0070405; C:GO:0005887; C:GO:0008021; C:GO:0016021; C:GO:0030121; C:GO:0030122; C:GO:0043195; C:GO:0060201	P:neurotransmitter transport; P:xenobiotic transmembrane transport; P:neurotransmitter secretion; P:response to xenobiotic stimulus; P:organic cation transport; P:monoamine transport; P:xenobiotic transport; P:transmembrane transport; P:membrane organization; P:ammonium transmembrane transport; P:acetate ester transport; F:acetylcholine transmembrane transporter activity; F:monoamine transmembran…	EC:7	Translocases
jg8770	1	569.398	2.70401e-52	testican-2	1041	P:GO:0007416; P:GO:0010811; P:GO:0010951; P:GO:0019800; P:GO:0030198; P:GO:0043436; P:GO:0045595; P:GO:1990830; P:GO:2000147; F:GO:0005509; F:GO:0005539; F:GO:0008191; F:GO:0050840; C:GO:0005576; C:GO:0031012	P:synapse assembly; P:positive regulation of cell-substrate adhesion; P:negative regulation of endopeptidase activity; P:peptide cross-linking via chondroitin 4-sulfate glycosaminoglycan; P:extracellular matrix organization; P:oxoacid metabolic process; P:regulation of cell differentiation; P:cellular response to leukemia inhibitory factor; P:positive regulation of cell motility; F:calcium ion bi…	NA	NA
jg8806	1	2968.73	3.80564e-61	histone acetyltransferase KAT6B isoform X2	5544	P:GO:0006334; P:GO:0006355; P:GO:0010628; P:GO:0010629; P:GO:0016573; P:GO:0043966; P:GO:0045892; P:GO:0045944; P:GO:1990830; F:GO:0003677; F:GO:0004402; F:GO:0008134; F:GO:0044877; F:GO:0046872; C:GO:0000786; C:GO:0070776	P:nucleosome assembly; P:regulation of transcription, DNA-templated; P:positive regulation of gene expression; P:negative regulation of gene expression; P:histone acetylation; P:histone H3 acetylation; P:negative regulation of transcription, DNA-templated; P:positive regulation of transcription by RNA polymerase II; P:cellular response to leukemia inhibitory factor; F:DNA binding; F:histone acety…	EC:2.3; EC:2; EC:2.3.1.48; EC:2.3.1	Acyltransferases; Transferases; Histone acetyltransferase; Acyltransferases
jg8821	1	396.279	2.70067e-08	transcription factor 7-like 2 isoform X26	546	P:GO:0000122; P:GO:0001568; P:GO:0005977; P:GO:0007223; P:GO:0009267; P:GO:0009791; P:GO:0010628; P:GO:0010629; P:GO:0010867; P:GO:0010909; P:GO:0014003; P:GO:0014013; P:GO:0016055; P:GO:0021915; P:GO:0021983; P:GO:0022402; P:GO:0030282; P:GO:0030514; P:GO:0030538; P:GO:0031016; P:GO:0031641; P:GO:0032024; P:GO:0032092; P:GO:0032252; P:GO:0032350; P:GO:0035019; P:GO:0035264; P:GO:0040037; P:GO:00…	P:negative regulation of transcription by RNA polymerase II; P:blood vessel development; P:glycogen metabolic process; P:Wnt signaling pathway, calcium modulating pathway; P:cellular response to starvation; P:post-embryonic development; P:positive regulation of gene expression; P:negative regulation of gene expression; P:positive regulation of triglyceride biosynthetic process; P:positive regulat…	NA	NA
jg8824	1	1953.84	5.29902e-29	transcription factor 7-like 2 isoform X23	1383	P:GO:0000122; P:GO:0001568; P:GO:0005977; P:GO:0007223; P:GO:0009267; P:GO:0009791; P:GO:0010628; P:GO:0010629; P:GO:0010867; P:GO:0010909; P:GO:0014003; P:GO:0014013; P:GO:0016055; P:GO:0021915; P:GO:0021983; P:GO:0022402; P:GO:0030282; P:GO:0030514; P:GO:0030538; P:GO:0031016; P:GO:0031641; P:GO:0032024; P:GO:0032092; P:GO:0032252; P:GO:0032350; P:GO:0035019; P:GO:0035264; P:GO:0040037; P:GO:00…	P:negative regulation of transcription by RNA polymerase II; P:blood vessel development; P:glycogen metabolic process; P:Wnt signaling pathway, calcium modulating pathway; P:cellular response to starvation; P:post-embryonic development; P:positive regulation of gene expression; P:negative regulation of gene expression; P:positive regulation of triglyceride biosynthetic process; P:positive regulat…	NA	NA
jg8853	1	205.25	3.51986e-38	zinc finger protein 385C-like isoform X2	1362	F:GO:0003676; F:GO:0008270	F:nucleic acid binding; F:zinc ion binding	NA	NA
jg8860	1	632.509	1.64528e-138	disintegrin and metalloproteinase domain-containing protein 11 isoform X4	2334	P:GO:0006508; P:GO:0006509; P:GO:0007229; P:GO:0045026; P:GO:0098609; F:GO:0004222; F:GO:0005178; C:GO:0005886; C:GO:0016021	P:proteolysis; P:membrane protein ectodomain proteolysis; P:integrin-mediated signaling pathway; P:plasma membrane fusion; P:cell-cell adhesion; F:metalloendopeptidase activity; F:integrin binding; C:plasma membrane; C:integral component of membrane	EC:3.4.24; EC:3.4; EC:3	Acting on peptide bonds (peptidases); Acting on peptide bonds (peptidases); Hydrolases
jg8891	1	360.225	1.34714e-57	pro-neuregulin-3, membrane-bound isoform	2352	P:GO:0001558; P:GO:0007171; P:GO:0007389; P:GO:0007399; P:GO:0009967; P:GO:0021842; P:GO:0035556; P:GO:0050768; P:GO:0060596; P:GO:0061098; P:GO:2000273; P:GO:2001223; F:GO:0005102; F:GO:0008083; F:GO:0030297; F:GO:0030971; F:GO:0045499; C:GO:0005615; C:GO:0005887; C:GO:0016021	P:regulation of cell growth; P:activation of transmembrane receptor protein tyrosine kinase activity; P:pattern specification process; P:nervous system development; P:positive regulation of signal transduction; P:chemorepulsion involved in interneuron migration from the subpallium to the cortex; P:intracellular signal transduction; P:negative regulation of neurogenesis; P:mammary placode formatio…	NA	NA
jg8910	1	658.036	3.17233e-45	MAGUK p55 subfamily member 3-like isoform X1	1827	NA	NA	NA	NA
jg8963	1	450.008	1.88065e-72	trafficking regulator of GLUT4 1 isoform X2	675	P:GO:0017156; P:GO:0031629; P:GO:0035544; P:GO:0045026; P:GO:0046907; P:GO:0048489; P:GO:0050884; P:GO:0097480; P:GO:1905513; F:GO:0017075; F:GO:0017124; C:GO:0008021; C:GO:0016021; C:GO:0042734; C:GO:0043679	P:calcium-ion regulated exocytosis; P:synaptic vesicle fusion to presynaptic active zone membrane; P:negative regulation of SNARE complex assembly; P:plasma membrane fusion; P:intracellular transport; P:synaptic vesicle transport; P:neuromuscular process controlling posture; P:establishment of synaptic vesicle localization; P:negative regulation of short-term synaptic potentiation; F:syntaxin-1 b…	NA	NA
jg8995	1	983.075	1.63539e-56	serine/threonine-protein kinase BRSK1 isoform X7	2472	P:GO:0006487; P:GO:0007095; P:GO:0007269; P:GO:0007528; P:GO:0008306; P:GO:0009411; P:GO:0010769; P:GO:0018105; P:GO:0030010; P:GO:0045664; P:GO:0046777; P:GO:0048167; P:GO:0050767; P:GO:0050770; P:GO:0051298; P:GO:0090176; P:GO:0098693; P:GO:2000807; F:GO:0000287; F:GO:0004674; F:GO:0005524; F:GO:0019901; F:GO:0043015; F:GO:0050321; C:GO:0005654; C:GO:0005813; C:GO:0008021; C:GO:0048786; C:GO:01…	P:protein N-linked glycosylation; P:mitotic G2 DNA damage checkpoint signaling; P:neurotransmitter secretion; P:neuromuscular junction development; P:associative learning; P:response to UV; P:regulation of cell morphogenesis involved in differentiation; P:peptidyl-serine phosphorylation; P:establishment of cell polarity; P:regulation of neuron differentiation; P:protein autophosphorylation; P:reg…	EC:2.7.1; EC:2.7.11.26; EC:2.7.11.1; EC:2.7; EC:2	Transferring phosphorus-containing groups; [Tau protein] kinase; Non-specific serine/threonine protein kinase; Transferring phosphorus-containing groups; Transferases
jg8998	1	272.631	1.33101e-64	troponin T, slow skeletal muscle-like isoform X1	738	P:GO:0006937; P:GO:0014883; P:GO:0030049; P:GO:0031444; P:GO:0045932; F:GO:0005523; F:GO:0031014; C:GO:0005829; C:GO:0005861	P:regulation of muscle contraction; P:transition between fast and slow fiber; P:muscle filament sliding; P:slow-twitch skeletal muscle fiber contraction; P:negative regulation of muscle contraction; F:tropomyosin binding; F:troponin T binding; C:cytosol; C:troponin complex	NA	NA
jg9009	1	1631.82	8.78212e-117	liprin-alpha-3-like isoform X1	3765	NA	NA	NA	NA
jg9016	1	737.723	3.17535e-60	leucine-rich repeat-containing protein 4B	2238	P:GO:0006469; P:GO:0019221; P:GO:0046426; P:GO:0051965; P:GO:1902532; F:GO:0004860; F:GO:0005102; C:GO:0005737; C:GO:0005886; C:GO:0016021; C:GO:0044300	P:negative regulation of protein kinase activity; P:cytokine-mediated signaling pathway; P:negative regulation of receptor signaling pathway via JAK-STAT; P:positive regulation of synapse assembly; P:negative regulation of intracellular signal transduction; F:protein kinase inhibitor activity; F:signaling receptor binding; C:cytoplasm; C:plasma membrane; C:integral component of membrane; C:cerebe…	NA	NA
jg9017	1	162.612	9.29896e-48	---NA---	480	NA	NA	NA	NA
jg9019	1	586.447	4.87696e-78	ubiquitin carboxyl-terminal hydrolase 31-like	3936	P:GO:0006511; P:GO:0016579; F:GO:0004843; C:GO:0005634	P:ubiquitin-dependent protein catabolic process; P:protein deubiquitination; F:thiol-dependent deubiquitinase; C:nucleus	EC:3.4; EC:3; EC:3.4.19; EC:3.4.19.12	Acting on peptide bonds (peptidases); Hydrolases; Acting on peptide bonds (peptidases); Ubiquitinyl hydrolase 1
jg9026	1	392.984	3.90172e-05	calpain-15 isoform X1	2268	P:GO:0006355; P:GO:0006508; P:GO:0007399; F:GO:0003700; F:GO:0004198; F:GO:0046872; C:GO:0005737	P:regulation of transcription, DNA-templated; P:proteolysis; P:nervous system development; F:DNA-binding transcription factor activity; F:calcium-dependent cysteine-type endopeptidase activity; F:metal ion binding; C:cytoplasm	EC:3.4.22; EC:3.4; EC:3	Acting on peptide bonds (peptidases); Acting on peptide bonds (peptidases); Hydrolases
jg9037	1	745.362	1.01307e-10	TBC1 domain family member 24 isoform X1	1707	P:GO:0007274; P:GO:0031646; P:GO:0043547; P:GO:0045666; P:GO:0050775; P:GO:0050806; P:GO:0060341; P:GO:0098693; P:GO:1900006; P:GO:1900408; P:GO:1902083; P:GO:1903204; P:GO:1903422; P:GO:2000463; P:GO:2001224; F:GO:0005096; C:GO:0005886; C:GO:0016020; C:GO:0031410; C:GO:0031594; C:GO:0043195; C:GO:0045202	P:neuromuscular synaptic transmission; P:positive regulation of nervous system process; P:positive regulation of GTPase activity; P:positive regulation of neuron differentiation; P:positive regulation of dendrite morphogenesis; P:positive regulation of synaptic transmission; P:regulation of cellular localization; P:regulation of synaptic vesicle cycle; P:positive regulation of dendrite developmen…	NA	NA
jg9045	1	3353.37	9.17858e-50	protein outspread isoform X5	7113	P:GO:0001934; P:GO:0032507; P:GO:0035509; P:GO:0065008; F:GO:0042802; C:GO:0001725; C:GO:0005829	P:positive regulation of protein phosphorylation; P:maintenance of protein location in cell; P:negative regulation of myosin-light-chain-phosphatase activity; P:regulation of biological quality; F:identical protein binding; C:stress fiber; C:cytosol	NA	NA
jg9063	1	313.022	1.30639e-40	serine/threonine-protein kinase SBK1	1311	P:GO:0006468; P:GO:0007420; P:GO:0018105; P:GO:0018107; F:GO:0004674; F:GO:0005524; F:GO:0106310; C:GO:0005737	P:protein phosphorylation; P:brain development; P:peptidyl-serine phosphorylation; P:peptidyl-threonine phosphorylation; F:protein serine/threonine kinase activity; F:ATP binding; F:protein serine kinase activity; C:cytoplasm	EC:2.7.1; EC:2.7.11.1; EC:2.7; EC:2	Transferring phosphorus-containing groups; Non-specific serine/threonine protein kinase; Transferring phosphorus-containing groups; Transferases
jg9070	1	261.311	5.38475e-77	rhomboid-related protein 1 isoform X1	1119	P:GO:0006508; P:GO:0007165; P:GO:0016485; F:GO:0004252; C:GO:0005887; C:GO:0016021	P:proteolysis; P:signal transduction; P:protein processing; F:serine-type endopeptidase activity; C:integral component of plasma membrane; C:integral component of membrane	EC:3.4.21; EC:3.4; EC:3; EC:3.4.21.105	Acting on peptide bonds (peptidases); Acting on peptide bonds (peptidases); Hydrolases; Rhomboid protease
jg9096	1	936.937	3.28547e-93	SH3 and multiple ankyrin repeat domains protein 1-like isoform X1	7098	P:GO:0007616; P:GO:0008306; P:GO:0030534; P:GO:0031646; P:GO:0032232; P:GO:0032507; P:GO:0035176; P:GO:0035418; P:GO:0042048; P:GO:0045666; P:GO:0046959; P:GO:0050769; P:GO:0050806; P:GO:0050885; P:GO:0050894; P:GO:0051704; P:GO:0060013; P:GO:0060074; P:GO:0060997; P:GO:0060999; P:GO:0065003; P:GO:0071625; P:GO:0099562; P:GO:1900006; P:GO:1900449; P:GO:2000311; P:GO:2000463; F:GO:0008022; F:GO:00…	P:long-term memory; P:associative learning; P:adult behavior; P:positive regulation of nervous system process; P:negative regulation of actin filament bundle assembly; P:maintenance of protein location in cell; P:social behavior; P:protein localization to synapse; P:olfactory behavior; P:positive regulation of neuron differentiation; P:habituation; P:positive regulation of neurogenesis; P:positiv…	NA	NA
jg9105	1	1001.2	7.92359e-28	katanin-interacting protein isoform X1	4887	NA	NA	NA	NA
jg9123	1	402.676	8.5224e-55	MAGUK p55 subfamily member 2b isoform X2	1644	P:GO:0019991; P:GO:0035001; P:GO:0035159; P:GO:0051260; P:GO:0060079; P:GO:0060291; F:GO:0030165; F:GO:0044325; C:GO:0005856; C:GO:0005918; C:GO:0014069; C:GO:0016328; C:GO:0032590; C:GO:0043197; C:GO:0043198	P:septate junction assembly; P:dorsal trunk growth, open tracheal system; P:regulation of tube length, open tracheal system; P:protein homooligomerization; P:excitatory postsynaptic potential; P:long-term synaptic potentiation; F:PDZ domain binding; F:transmembrane transporter binding; C:cytoskeleton; C:septate junction; C:postsynaptic density; C:lateral plasma membrane; C:dendrite membrane; C:de…	NA	NA
jg9168	1	408.059	3.33083e-47	cytohesin-3	1380	P:GO:0007391; P:GO:0008586; P:GO:0014068; P:GO:0030100; P:GO:0032012; P:GO:0032014; P:GO:0032147; P:GO:0040018; P:GO:0043406; P:GO:0045785; P:GO:0046628; P:GO:0048193; P:GO:0050790; P:GO:0090162; P:GO:0110020; P:GO:2000481; F:GO:0005085; F:GO:0005547; F:GO:0042803; F:GO:0051020; C:GO:0000139; C:GO:0001726; C:GO:0005654; C:GO:0005829; C:GO:0005912; C:GO:0005923; C:GO:0030496; C:GO:0031234; C:GO:00…	P:dorsal closure; P:imaginal disc-derived wing vein morphogenesis; P:positive regulation of phosphatidylinositol 3-kinase signaling; P:regulation of endocytosis; P:regulation of ARF protein signal transduction; P:positive regulation of ARF protein signal transduction; P:activation of protein kinase activity; P:positive regulation of multicellular organism growth; P:positive regulation of MAP kina…	NA	NA
jg9242	1	494.138	7.24302e-41	casein kinase I	1332	P:GO:0001737; P:GO:0001933; P:GO:0006281; P:GO:0006468; P:GO:0006897; P:GO:0007446; P:GO:0007555; P:GO:0008062; P:GO:0008360; P:GO:0009410; P:GO:0010389; P:GO:0018105; P:GO:0030178; P:GO:0030307; P:GO:0030431; P:GO:0030838; P:GO:0032091; P:GO:0032436; P:GO:0032922; P:GO:0042067; P:GO:0042306; P:GO:0042752; P:GO:0043066; P:GO:0045475; P:GO:0046777; P:GO:0048148; P:GO:0050769; P:GO:0051781; P:GO:00…	P:establishment of imaginal disc-derived wing hair orientation; P:negative regulation of protein phosphorylation; P:DNA repair; P:protein phosphorylation; P:endocytosis; P:imaginal disc growth; P:regulation of ecdysteroid secretion; P:eclosion rhythm; P:regulation of cell shape; P:response to xenobiotic stimulus; P:regulation of G2/M transition of mitotic cell cycle; P:peptidyl-serine phosphoryla…	EC:2.7.1; EC:2.7.11.1; EC:2.7; EC:2	Transferring phosphorus-containing groups; Non-specific serine/threonine protein kinase; Transferring phosphorus-containing groups; Transferases
jg9253	1	184.09	6.69894e-24	cold shock domain-containing protein C2a	474	P:GO:0043488; F:GO:0003676; F:GO:0003730; F:GO:0008134; C:GO:0005634; C:GO:0005737	P:regulation of mRNA stability; F:nucleic acid binding; F:mRNA 3'-UTR binding; F:transcription factor binding; C:nucleus; C:cytoplasm	NA	NA
jg9347	1	744.454	2.87475e-67	voltage-dependent T-type calcium channel subunit alpha-1G isoform X1	6447	NA	NA	NA	NA
jg9476	1	444.033	2.20544e-66	protein shisa-6 isoform X1	2067	P:GO:0007283; P:GO:0048172; P:GO:0090090; P:GO:0098976; P:GO:0099175; P:GO:1901626; P:GO:1904717; F:GO:0030165; F:GO:0035255; C:GO:0014069; C:GO:0032281; C:GO:0098985	P:spermatogenesis; P:regulation of short-term neuronal synaptic plasticity; P:negative regulation of canonical Wnt signaling pathway; P:excitatory chemical synaptic transmission; P:regulation of postsynapse organization; P:regulation of postsynaptic membrane organization; P:regulation of AMPA glutamate receptor clustering; F:PDZ domain binding; F:ionotropic glutamate receptor binding; C:postsynap…	NA	NA
jg9516	1	752.149	4.56645e-31	rho GTPase-activating protein 23-like isoform X1	4872	P:GO:0007266; P:GO:0007480; P:GO:0008104; P:GO:0010470; P:GO:0043547; P:GO:0051056; F:GO:0005096; F:GO:0005515; C:GO:0005829; C:GO:0030054	P:Rho protein signal transduction; P:imaginal disc-derived leg morphogenesis; P:protein localization; P:regulation of gastrulation; P:positive regulation of GTPase activity; P:regulation of small GTPase mediated signal transduction; F:GTPase activator activity; F:protein binding; C:cytosol; C:cell junction	NA	NA
jg9524	1	515.802	8.08647e-45	formin-2 isoform X1	4323	P:GO:0006974; P:GO:0007186; P:GO:0016192; P:GO:0030838; P:GO:0040038; P:GO:0042177; P:GO:0043066; P:GO:0045010; P:GO:0045451; P:GO:0046907; P:GO:0051295; P:GO:0051758; P:GO:0070649; P:GO:0071456; F:GO:0003779; F:GO:0004930; F:GO:0008017; C:GO:0005730; C:GO:0005789; C:GO:0005819; C:GO:0005829; C:GO:0005902; C:GO:0005938; C:GO:0016021; C:GO:0030659; C:GO:0099568	P:cellular response to DNA damage stimulus; P:G protein-coupled receptor signaling pathway; P:vesicle-mediated transport; P:positive regulation of actin filament polymerization; P:polar body extrusion after meiotic divisions; P:negative regulation of protein catabolic process; P:negative regulation of apoptotic process; P:actin nucleation; P:pole plasm oskar mRNA localization; P:intracellular tra…	NA	NA
jg9544	1	736.513	1.0515e-103	ras-related C3 botulinum toxin substrate 3	579	P:GO:0000132; P:GO:0001764; P:GO:0001954; P:GO:0002066; P:GO:0002118; P:GO:0002119; P:GO:0002433; P:GO:0007015; P:GO:0007163; P:GO:0007254; P:GO:0007264; P:GO:0007266; P:GO:0007298; P:GO:0007369; P:GO:0007390; P:GO:0007394; P:GO:0007395; P:GO:0007413; P:GO:0007419; P:GO:0007422; P:GO:0007426; P:GO:0007435; P:GO:0007516; P:GO:0007520; P:GO:0007613; P:GO:0007617; P:GO:0007631; P:GO:0008045; P:GO:00…	P:establishment of mitotic spindle orientation; P:neuron migration; P:positive regulation of cell-matrix adhesion; P:columnar/cuboidal epithelial cell development; P:aggressive behavior; P:nematode larval development; P:immune response-regulating cell surface receptor signaling pathway involved in phagocytosis; P:actin filament organization; P:establishment or maintenance of cell polarity; P:JNK …	EC:2.3.1.48; EC:3.6.5.1; EC:3.6.5.2; EC:3.6.1; EC:2.3; EC:2; EC:3.6; EC:3; EC:2.3.1	Histone acetyltransferase; Heterotrimeric G-protein GTPase; Small monomeric GTPase; Acting on acid anhydrides; Acyltransferases; Transferases; Acting on acid anhydrides; Hydrolases; Acyltransferases
jg9547	1	1874.81	7.89574e-75	V-type proton ATPase 116 kDa subunit a isoform X1	2616	P:GO:0001666; P:GO:0002119; P:GO:0006805; P:GO:0007035; P:GO:0007271; P:GO:0008286; P:GO:0009168; P:GO:0009792; P:GO:0015833; P:GO:0015986; P:GO:0016241; P:GO:0033572; P:GO:0040013; P:GO:0043068; P:GO:0043312; P:GO:0050830; P:GO:0051704; P:GO:0070072; P:GO:1901998; F:GO:0008553; F:GO:0016887; F:GO:0046961; F:GO:0051117; C:GO:0005765; C:GO:0005794; C:GO:0005829; C:GO:0010008; C:GO:0016324; C:GO:00…	P:response to hypoxia; P:nematode larval development; P:xenobiotic metabolic process; P:vacuolar acidification; P:synaptic transmission, cholinergic; P:insulin receptor signaling pathway; P:purine ribonucleoside monophosphate biosynthetic process; P:embryo development ending in birth or egg hatching; P:peptide transport; P:ATP synthesis coupled proton transport; P:regulation of macroautophagy; P:…	EC:7.1.3.1; EC:3.6.1; EC:7.1.2.1; EC:3.6; EC:3; EC:7	H(+)-exporting diphosphatase; Acting on acid anhydrides; P-type H(+)-exporting transporter; Acting on acid anhydrides; Hydrolases; Translocases
jg9574	1	375.546	5.59643e-48	serine/threonine-protein kinase SBK1	1305	P:GO:0006468; P:GO:0018105; P:GO:0018107; F:GO:0004674; F:GO:0005524; F:GO:0106310; C:GO:0005737	P:protein phosphorylation; P:peptidyl-serine phosphorylation; P:peptidyl-threonine phosphorylation; F:protein serine/threonine kinase activity; F:ATP binding; F:protein serine kinase activity; C:cytoplasm	EC:2.7.1; EC:2.7.11.1; EC:2.7; EC:2	Transferring phosphorus-containing groups; Non-specific serine/threonine protein kinase; Transferring phosphorus-containing groups; Transferases
jg29501	1	250.795	2.39689e-58	apical junction component 1 homolog	1977	P:GO:0045216; F:GO:0008157	P:cell-cell junction organization; F:protein phosphatase 1 binding	NA	NA
jg29552	1	1120.18	3.1316e-50	peptidyl-glycine alpha-amidating monooxygenase isoform X1	2742	P:GO:0001519; P:GO:0001666; P:GO:0001676; P:GO:0002791; P:GO:0006357; P:GO:0006518; P:GO:0007417; P:GO:0007507; P:GO:0007595; P:GO:0009268; P:GO:0009404; P:GO:0009410; P:GO:0018032; P:GO:0022602; P:GO:0032355; P:GO:0032956; P:GO:0042476; P:GO:0046688; P:GO:0050708; P:GO:0051260; P:GO:0051384; P:GO:0060135; P:GO:0060173; F:GO:0004504; F:GO:0004598; F:GO:0005507; F:GO:0005509; F:GO:0008270; F:GO:00…	P:peptide amidation; P:response to hypoxia; P:long-chain fatty acid metabolic process; P:regulation of peptide secretion; P:regulation of transcription by RNA polymerase II; P:peptide metabolic process; P:central nervous system development; P:heart development; P:lactation; P:response to pH; P:toxin metabolic process; P:response to xenobiotic stimulus; P:protein amidation; P:ovulation cycle proce…	EC:4.3; EC:1; EC:1.14.17.3; EC:1.14; EC:4.3.2.5; EC:4; EC:1.14.17; EC:4.3.2	Carbon-nitrogen lyases; Oxidoreductases; Peptidylglycine monooxygenase; Acting on paired donors, with incorporation or reduction of molecular oxygen. The oxygen incorporated need not be derived from O(2); Peptidylamidoglycolate lyase; Lyases; Acting on paired donors, with incorporation or reduction of molecular oxygen. The oxygen incorporated need not be derived from O(2); Carbon-nitrogen lyases
jg29615	1	251.837	4.32739e-26	synaptic vesicle glycoprotein 2C-like	2211	P:GO:0006836; P:GO:0007268; P:GO:0055085; F:GO:0022857; C:GO:0005886; C:GO:0016021; C:GO:0030672	P:neurotransmitter transport; P:chemical synaptic transmission; P:transmembrane transport; F:transmembrane transporter activity; C:plasma membrane; C:integral component of membrane; C:synaptic vesicle membrane	EC:7	Translocases
jg29622	1	291.032	6.50815e-27	high affinity cAMP-specific and IBMX-insensitive 3',5'-cyclic phosphodiesterase 8B isoform X1	2631	P:GO:0001662; P:GO:0001934; P:GO:0006198; P:GO:0007165; P:GO:0007186; P:GO:0007498; P:GO:0008542; P:GO:0035106; P:GO:0046676; P:GO:0050885; P:GO:0060283; P:GO:0070374; P:GO:0090032; P:GO:1900194; P:GO:1900408; P:GO:1903206; P:GO:1905880; P:GO:2001039; F:GO:0004115; F:GO:0046872; C:GO:0005829	P:behavioral fear response; P:positive regulation of protein phosphorylation; P:cAMP catabolic process; P:signal transduction; P:G protein-coupled receptor signaling pathway; P:mesoderm development; P:visual learning; P:operant conditioning; P:negative regulation of insulin secretion; P:neuromuscular process controlling balance; P:negative regulation of oocyte development; P:positive regulation o…	EC:3.1.4; EC:3.1.4.17; EC:3.1; EC:3; EC:3.1.4.53	Acting on ester bonds; 3',5'-cyclic-nucleotide phosphodiesterase; Acting on ester bonds; Hydrolases; 3',5'-cyclic-AMP phosphodiesterase
jg29665	1	316.86	1.67556e-69	small glutamine-rich tetratricopeptide repeat-containing protein beta	921	P:GO:0032460; P:GO:1903646; F:GO:0008022; F:GO:0030544; F:GO:0042803; F:GO:0046982; F:GO:0051087	P:negative regulation of protein oligomerization; P:positive regulation of chaperone-mediated protein folding; F:protein C-terminus binding; F:Hsp70 protein binding; F:protein homodimerization activity; F:protein heterodimerization activity; F:chaperone binding	NA	NA
jg29695	1	729.76	2.18338e-22	ankyrin repeat family A protein 2	936	P:GO:0006357; P:GO:0043254; F:GO:0003712; F:GO:0019901; F:GO:0031625; F:GO:0042826; F:GO:0050750; C:GO:0005634; C:GO:0005829; C:GO:0016020; C:GO:0032991	P:regulation of transcription by RNA polymerase II; P:regulation of protein-containing complex assembly; F:transcription coregulator activity; F:protein kinase binding; F:ubiquitin protein ligase binding; F:histone deacetylase binding; F:low-density lipoprotein particle receptor binding; C:nucleus; C:cytosol; C:membrane; C:protein-containing complex	NA	NA
jg29698	1	944.04	9.33505e-53	ectoderm-neural cortex protein 1	1776	P:GO:0007399; P:GO:0010499; P:GO:0010976; P:GO:0016567; P:GO:0017148; P:GO:0045666; P:GO:0050769; F:GO:0003779; C:GO:0000228; C:GO:0000785; C:GO:0005654; C:GO:0005730; C:GO:0005737; C:GO:0005856; C:GO:0016363; C:GO:0031463; C:GO:0043025	P:nervous system development; P:proteasomal ubiquitin-independent protein catabolic process; P:positive regulation of neuron projection development; P:protein ubiquitination; P:negative regulation of translation; P:positive regulation of neuron differentiation; P:positive regulation of neurogenesis; F:actin binding; C:nuclear chromosome; C:chromatin; C:nucleoplasm; C:nucleolus; C:cytoplasm; C:cyt…	NA	NA
jg29711	1	1868.49	3.08286e-57	olfactomedin 1b isoform X1	462	P:GO:0003190; P:GO:0007399; P:GO:0010628; P:GO:0010629; P:GO:0010718; P:GO:0010769; P:GO:0023041; P:GO:0030516; P:GO:0045664; P:GO:0050768; P:GO:0050770; P:GO:0051259; P:GO:0060317; P:GO:1902430; P:GO:2001223; F:GO:0001540; C:GO:0005576; C:GO:0005615; C:GO:0005783; C:GO:0032281; C:GO:0043025; C:GO:0044295; C:GO:0045202; C:GO:0097060	P:atrioventricular valve formation; P:nervous system development; P:positive regulation of gene expression; P:negative regulation of gene expression; P:positive regulation of epithelial to mesenchymal transition; P:regulation of cell morphogenesis involved in differentiation; P:neuronal signal transduction; P:regulation of axon extension; P:regulation of neuron differentiation; P:negative regulat…	NA	NA
jg29714	1	486.258	7.54028e-115	fibrinogen C domain-containing protein 1 isoform X1	1452	F:GO:0008061; C:GO:0016021	F:chitin binding; C:integral component of membrane	NA	NA
jg29719	1	2483.66	1.39871e-90	microtubule-associated protein 1B	5988	P:GO:0000226; P:GO:0007399; P:GO:0007409; P:GO:0008088; P:GO:0008355; P:GO:0008582; P:GO:0043524; P:GO:0048749; P:GO:0048813; P:GO:0051960; P:GO:0060052; F:GO:0008017; F:GO:0019900; C:GO:0005874; C:GO:0005875; C:GO:0030424; C:GO:0030425; C:GO:0043025	P:microtubule cytoskeleton organization; P:nervous system development; P:axonogenesis; P:axo-dendritic transport; P:olfactory learning; P:regulation of synaptic assembly at neuromuscular junction; P:negative regulation of neuron apoptotic process; P:compound eye development; P:dendrite morphogenesis; P:regulation of nervous system development; P:neurofilament cytoskeleton organization; F:microtub…	NA	NA
jg29728	1	419.967	2.59945e-15	ubiquitin carboxyl-terminal hydrolase 20 isoform X1	2847	P:GO:0006511; P:GO:0006897; P:GO:0008277; P:GO:0016579; P:GO:0021551; P:GO:0070536; P:GO:0071108; P:GO:1904888; F:GO:0001664; F:GO:0004197; F:GO:0004843; F:GO:0008270; C:GO:0005813; C:GO:0005815; C:GO:0005829; C:GO:0048471	P:ubiquitin-dependent protein catabolic process; P:endocytosis; P:regulation of G protein-coupled receptor signaling pathway; P:protein deubiquitination; P:central nervous system morphogenesis; P:protein K63-linked deubiquitination; P:protein K48-linked deubiquitination; P:cranial skeletal system development; F:G protein-coupled receptor binding; F:cysteine-type endopeptidase activity; F:thiol-de…	EC:3.4.22; EC:3.4; EC:3; EC:3.4.19; EC:3.4.19.12	Acting on peptide bonds (peptidases); Acting on peptide bonds (peptidases); Hydrolases; Acting on peptide bonds (peptidases); Ubiquitinyl hydrolase 1
jg29760	1	1219.23	5.08821e-69	calmodulin-regulated spectrin-associated protein 1-B-like isoform X1	4809	P:GO:0031175; F:GO:0005516; F:GO:0008017; F:GO:0030507; C:GO:0005737; C:GO:0005874	P:neuron projection development; F:calmodulin binding; F:microtubule binding; F:spectrin binding; C:cytoplasm; C:microtubule	NA	NA
jg29769	1	1475.36	7.84678e-153	alpha-2,8-sialyltransferase 8E isoform X1	1407	P:GO:0005975; P:GO:0006688; P:GO:0097503; F:GO:0003828; C:GO:0000139; C:GO:0098791	P:carbohydrate metabolic process; P:glycosphingolipid biosynthetic process; P:sialylation; F:alpha-N-acetylneuraminate alpha-2,8-sialyltransferase activity; C:Golgi membrane; C:Golgi apparatus subcompartment	EC:2.4; EC:2; EC:2.4.99.8	Glycosyltransferases; Transferases; Alpha-N-acetylneuraminate alpha-2,8-sialyltransferase
jg29781	1	349.57	1.38994e-53	mucin-5AC isoform X1	3057	NA	NA	NA	NA
jg29783	1	844.487	2.90872e-62	protein prune homolog 2 isoform X1	975	NA	NA	NA	NA
jg29786	1	738.563	3.12338e-27	heterogeneous nuclear ribonucleoprotein K, like isoform X1	1296	P:GO:0000122; P:GO:0001541; P:GO:0001822; P:GO:0001889; P:GO:0006953; P:GO:0007422; P:GO:0007446; P:GO:0007568; P:GO:0008283; P:GO:0009792; P:GO:0010988; P:GO:0014823; P:GO:0021549; P:GO:0021766; P:GO:0021987; P:GO:0030324; P:GO:0032091; P:GO:0032368; P:GO:0032869; P:GO:0033120; P:GO:0035107; P:GO:0043010; P:GO:0043066; P:GO:0045165; P:GO:0045666; P:GO:0045944; P:GO:0048025; P:GO:0048260; P:GO:00…	P:negative regulation of transcription by RNA polymerase II; P:ovarian follicle development; P:kidney development; P:liver development; P:acute-phase response; P:peripheral nervous system development; P:imaginal disc growth; P:aging; P:cell population proliferation; P:embryo development ending in birth or egg hatching; P:regulation of low-density lipoprotein particle clearance; P:response to acti…	EC:2.4.1.133	Xylosylprotein 4-beta-galactosyltransferase
jg29788	1	599.668	5.25953e-128	neurotrophic tyrosine kinase, receptor, type 2b isoform X1	2382	P:GO:0001570; P:GO:0001764; P:GO:0006954; P:GO:0007169; P:GO:0007178; P:GO:0007202; P:GO:0007399; P:GO:0007528; P:GO:0007568; P:GO:0007612; P:GO:0007616; P:GO:0007623; P:GO:0007631; P:GO:0008284; P:GO:0009416; P:GO:0010628; P:GO:0010770; P:GO:0010976; P:GO:0010996; P:GO:0014047; P:GO:0014068; P:GO:0018108; P:GO:0021954; P:GO:0021987; P:GO:0030154; P:GO:0031547; P:GO:0033138; P:GO:0034220; P:GO:00…	P:vasculogenesis; P:neuron migration; P:inflammatory response; P:transmembrane receptor protein tyrosine kinase signaling pathway; P:transmembrane receptor protein serine/threonine kinase signaling pathway; P:activation of phospholipase C activity; P:nervous system development; P:neuromuscular junction development; P:aging; P:learning; P:long-term memory; P:circadian rhythm; P:feeding behavior; P…	EC:2.7.10.1; EC:2.7.1; EC:2.7; EC:2; EC:7; EC:2.7.11.30	Receptor protein-tyrosine kinase; Transferring phosphorus-containing groups; Transferring phosphorus-containing groups; Transferases; Translocases; Receptor protein serine/threonine kinase
jg29815	1	1080.66	8.26133e-57	mitogen-activated protein kinase 10 isoform X1	1683	P:GO:0000165; P:GO:0001736; P:GO:0002066; P:GO:0006468; P:GO:0006972; P:GO:0007258; P:GO:0007395; P:GO:0007411; P:GO:0007616; P:GO:0008340; P:GO:0009408; P:GO:0010508; P:GO:0010628; P:GO:0016319; P:GO:0019731; P:GO:0030050; P:GO:0030858; P:GO:0034614; P:GO:0035006; P:GO:0035313; P:GO:0043508; P:GO:0043652; P:GO:0045665; P:GO:0045666; P:GO:0046529; P:GO:0046843; P:GO:0046844; P:GO:0048511; P:GO:00…	P:MAPK cascade; P:establishment of planar polarity; P:columnar/cuboidal epithelial cell development; P:protein phosphorylation; P:hyperosmotic response; P:JUN phosphorylation; P:dorsal closure, spreading of leading edge cells; P:axon guidance; P:long-term memory; P:determination of adult lifespan; P:response to heat; P:positive regulation of autophagy; P:positive regulation of gene expression; P:…	EC:2.7.1; EC:2.7.11.24; EC:2.7; EC:2	Transferring phosphorus-containing groups; Mitogen-activated protein kinase; Transferring phosphorus-containing groups; Transferases
jg29823	1	301.354	2.6501e-85	potassium/sodium hyperpolarization-activated cyclic nucleotide-gated channel 1	2829	P:GO:0035725; P:GO:0071805; F:GO:0005249; F:GO:0005272; F:GO:0030552; C:GO:0005887	P:sodium ion transmembrane transport; P:potassium ion transmembrane transport; F:voltage-gated potassium channel activity; F:sodium channel activity; F:cAMP binding; C:integral component of plasma membrane	EC:7	Translocases
jg29856	1	921.693	1.64598e-06	alpha-synuclein-like	378	P:GO:0014059; C:GO:0005576; C:GO:0005634; C:GO:0005737; C:GO:0016020; C:GO:0045202	P:regulation of dopamine secretion; C:extracellular region; C:nucleus; C:cytoplasm; C:membrane; C:synapse	NA	NA
jg29877	1	398.149	4.21096e-61	BMP/retinoic acid-inducible neural-specific protein 1	2127	P:GO:0001662; P:GO:0007614; P:GO:0008219; P:GO:0035176; P:GO:0035640; P:GO:0042711; P:GO:0045666; P:GO:0045930; P:GO:0050768; P:GO:0050769; P:GO:0051704; P:GO:0071229; P:GO:0071300; P:GO:0071625; C:GO:0005783; C:GO:0030425; C:GO:0043025	P:behavioral fear response; P:short-term memory; P:cell death; P:social behavior; P:exploration behavior; P:maternal behavior; P:positive regulation of neuron differentiation; P:negative regulation of mitotic cell cycle; P:negative regulation of neurogenesis; P:positive regulation of neurogenesis; P:multi-organism process; P:cellular response to acid chemical; P:cellular response to retinoic acid…	NA	NA
jg29887	1	1016.75	1.16679e-40	regulator of G-protein signaling 3 isoform X2	1587	P:GO:0008277; P:GO:0043407; P:GO:0043547; F:GO:0005096; F:GO:0005515; C:GO:0005654; C:GO:0005829; C:GO:0005886; C:GO:0005938; C:GO:0099568	P:regulation of G protein-coupled receptor signaling pathway; P:negative regulation of MAP kinase activity; P:positive regulation of GTPase activity; F:GTPase activator activity; F:protein binding; C:nucleoplasm; C:cytosol; C:plasma membrane; C:cell cortex; C:cytoplasmic region	NA	NA
jg29893	1	460.004	9.72037e-83	dynamin-1a isoform X2	918	P:GO:0000266; P:GO:0002031; P:GO:0003374; P:GO:0006897; P:GO:0007032; P:GO:0007605; P:GO:0008344; P:GO:0016185; P:GO:0045920; P:GO:0046907; P:GO:0048013; P:GO:0051262; P:GO:0051932; P:GO:0060341; P:GO:0061025; P:GO:0097480; P:GO:0098657; P:GO:0098693; P:GO:1900244; P:GO:1901998; P:GO:1904645; F:GO:0003924; F:GO:0005525; F:GO:0008017; F:GO:0008022; F:GO:0017124; F:GO:0019901; F:GO:0031749; F:GO:00…	P:mitochondrial fission; P:G protein-coupled receptor internalization; P:dynamin family protein polymerization involved in mitochondrial fission; P:endocytosis; P:endosome organization; P:sensory perception of sound; P:adult locomotory behavior; P:synaptic vesicle budding from presynaptic endocytic zone membrane; P:negative regulation of exocytosis; P:intracellular transport; P:ephrin receptor si…	EC:3.6.1; EC:3.6; EC:3; EC:3.6.5.5	Acting on acid anhydrides; Acting on acid anhydrides; Hydrolases; Dynamin GTPase
jg29895	1	775.046	8.27224e-67	dynamin-1 isoform X3	1803	P:GO:0000266; P:GO:0002031; P:GO:0003374; P:GO:0007032; P:GO:0007605; P:GO:0008344; P:GO:0016185; P:GO:0045920; P:GO:0046907; P:GO:0048013; P:GO:0051262; P:GO:0051932; P:GO:0060341; P:GO:0061025; P:GO:0097480; P:GO:0098657; P:GO:0098693; P:GO:1900244; P:GO:1901998; P:GO:1904645; F:GO:0003924; F:GO:0008017; F:GO:0008022; F:GO:0017124; F:GO:0019901; F:GO:0031749; F:GO:0042802; F:GO:0044877; F:GO:00…	P:mitochondrial fission; P:G protein-coupled receptor internalization; P:dynamin family protein polymerization involved in mitochondrial fission; P:endosome organization; P:sensory perception of sound; P:adult locomotory behavior; P:synaptic vesicle budding from presynaptic endocytic zone membrane; P:negative regulation of exocytosis; P:intracellular transport; P:ephrin receptor signaling pathway…	EC:3.6.1; EC:3.6; EC:3; EC:3.6.5.5	Acting on acid anhydrides; Acting on acid anhydrides; Hydrolases; Dynamin GTPase
jg29968	1	456.714	1.01412e-64	small G protein signaling modulator 1 isoform X2	3912	P:GO:0006886; P:GO:0010628; P:GO:0015833; P:GO:0031338; P:GO:0045944; P:GO:0050790; P:GO:0090630; P:GO:1990502; F:GO:0005096; F:GO:0031267; C:GO:0000138; C:GO:0005769; C:GO:0005797; C:GO:0005829; C:GO:0030659	P:intracellular protein transport; P:positive regulation of gene expression; P:peptide transport; P:regulation of vesicle fusion; P:positive regulation of transcription by RNA polymerase II; P:regulation of catalytic activity; P:activation of GTPase activity; P:dense core granule maturation; F:GTPase activator activity; F:small GTPase binding; C:Golgi trans cisterna; C:early endosome; C:Golgi med…	NA	NA
jg29976	1	340.215	6.56692e-53	serine/threonine-protein kinase TAO3	1317	NA	NA	EC:2.7.11.1	Non-specific serine/threonine protein kinase
jg30001	1	222.928	7.01038e-76	E3 ubiquitin-protein ligase RNF34 isoform X1	1239	P:GO:0006915; P:GO:0035872; P:GO:0043161; P:GO:0070417; P:GO:0070936; P:GO:1901797; P:GO:1902042; P:GO:2000374; P:GO:2001271; F:GO:0002039; F:GO:0008270; F:GO:0031625; F:GO:0043168; F:GO:0046872; F:GO:0061630; F:GO:1901981; C:GO:0005737; C:GO:0005886; C:GO:0016604	P:apoptotic process; P:nucleotide-binding domain, leucine rich repeat containing receptor signaling pathway; P:proteasome-mediated ubiquitin-dependent protein catabolic process; P:cellular response to cold; P:protein K48-linked ubiquitination; P:negative regulation of signal transduction by p53 class mediator; P:negative regulation of extrinsic apoptotic signaling pathway via death domain recepto…	EC:2.3.2.31; EC:2	RBR-type E3 ubiquitin transferase; Transferases
jg30012	1	1004.14	1.75381e-14	AP2-associated protein kinase 1-like isoform X3	2742	P:GO:0006468; P:GO:0008356; P:GO:0032880; P:GO:0045747; P:GO:0046777; P:GO:0048813; P:GO:0050821; P:GO:0061024; P:GO:2000369; F:GO:0004672; F:GO:0004674; F:GO:0005112; F:GO:0005524; F:GO:0035612; F:GO:0051425; C:GO:0005829; C:GO:0005905; C:GO:0019897; C:GO:0030136; C:GO:0030425; C:GO:0031252; C:GO:0043025; C:GO:0043195; C:GO:0071439	P:protein phosphorylation; P:asymmetric cell division; P:regulation of protein localization; P:positive regulation of Notch signaling pathway; P:protein autophosphorylation; P:dendrite morphogenesis; P:protein stabilization; P:membrane organization; P:regulation of clathrin-dependent endocytosis; F:protein kinase activity; F:protein serine/threonine kinase activity; F:Notch binding; F:ATP binding…	EC:2.7.1; EC:2.7.11.1; EC:2.7; EC:2	Transferring phosphorus-containing groups; Non-specific serine/threonine protein kinase; Transferring phosphorus-containing groups; Transferases
jg30019	1	1305.58	1.3165e-16	calcium-binding protein P-like	1485	P:GO:0051260; C:GO:0016020	P:protein homooligomerization; C:membrane	NA	NA
jg30026	1	670.162	3.0359e-18	V-type proton ATPase 116 kDa subunit a2 isoform X1	2541	P:GO:0006805; P:GO:0006879; P:GO:0006955; P:GO:0007035; P:GO:0007224; P:GO:0008286; P:GO:0009168; P:GO:0015833; P:GO:0015986; P:GO:0016241; P:GO:0033572; P:GO:0036295; P:GO:0060271; P:GO:0070072; P:GO:1902600; F:GO:0008553; F:GO:0015078; F:GO:0016887; F:GO:0046961; F:GO:0051117; C:GO:0000220; C:GO:0001669; C:GO:0005886; C:GO:0010008; C:GO:0016021; C:GO:0030670; C:GO:0036038	P:xenobiotic metabolic process; P:cellular iron ion homeostasis; P:immune response; P:vacuolar acidification; P:smoothened signaling pathway; P:insulin receptor signaling pathway; P:purine ribonucleoside monophosphate biosynthetic process; P:peptide transport; P:ATP synthesis coupled proton transport; P:regulation of macroautophagy; P:transferrin transport; P:cellular response to increased oxygen…	EC:7.1.3.1; EC:3.6.1; EC:7.1.2.1; EC:3.6; EC:3; EC:7	H(+)-exporting diphosphatase; Acting on acid anhydrides; P-type H(+)-exporting transporter; Acting on acid anhydrides; Hydrolases; Translocases
jg30027	1	567.875	5.90964e-57	oxysterol-binding protein 2	2235	P:GO:0006869; P:GO:0006886; P:GO:0007030; P:GO:0007291; P:GO:0015833; F:GO:0008289; C:GO:0005783; C:GO:0005794	P:lipid transport; P:intracellular protein transport; P:Golgi organization; P:sperm individualization; P:peptide transport; F:lipid binding; C:endoplasmic reticulum; C:Golgi apparatus	NA	NA
jg30030	1	296.161	1.42954e-53	inositol polyphosphate 5-phosphatase K	2532	P:GO:0006661; P:GO:0010977; P:GO:0031115; P:GO:0033137; P:GO:0043647; P:GO:0045665; P:GO:0046856; P:GO:0050768; F:GO:0004439; F:GO:0004445; F:GO:0034485; F:GO:0052658; F:GO:0052659; C:GO:0001726; C:GO:0005829; C:GO:0005886; C:GO:0019898; C:GO:0030426; C:GO:0043198	P:phosphatidylinositol biosynthetic process; P:negative regulation of neuron projection development; P:negative regulation of microtubule polymerization; P:negative regulation of peptidyl-serine phosphorylation; P:inositol phosphate metabolic process; P:negative regulation of neuron differentiation; P:phosphatidylinositol dephosphorylation; P:negative regulation of neurogenesis; F:phosphatidylino…	EC:3.1; EC:3.1.3.36; EC:3.1.3.56; EC:3; EC:3.1.3	Acting on ester bonds; Phosphoinositide 5-phosphatase; Inositol-polyphosphate 5-phosphatase; Hydrolases; Acting on ester bonds
jg30050	1	444.157	3.90321e-41	guanine nucleotide-binding protein G(z) subunit alpha	1179	P:GO:0006457; P:GO:0007187; P:GO:0007188; P:GO:0007191; P:GO:0007193; P:GO:0007606; P:GO:0019933; F:GO:0003924; F:GO:0005525; F:GO:0031683; F:GO:0031821; F:GO:0032550; C:GO:0005635; C:GO:0005783; C:GO:0005829; C:GO:0005834; C:GO:0030424; C:GO:0030425; C:GO:0043025; C:GO:0045202	P:protein folding; P:G protein-coupled receptor signaling pathway, coupled to cyclic nucleotide second messenger; P:adenylate cyclase-modulating G protein-coupled receptor signaling pathway; P:adenylate cyclase-activating dopamine receptor signaling pathway; P:adenylate cyclase-inhibiting G protein-coupled receptor signaling pathway; P:sensory perception of chemical stimulus; P:cAMP-mediated sign…	EC:3.6.1; EC:3.6; EC:3	Acting on acid anhydrides; Acting on acid anhydrides; Hydrolases
jg30052	1	668.153	1.29628e-58	RING finger protein 208	675	P:GO:0016567; P:GO:0051865; F:GO:0004842; F:GO:0046872; C:GO:0005654; C:GO:0005829	P:protein ubiquitination; P:protein autoubiquitination; F:ubiquitin-protein transferase activity; F:metal ion binding; C:nucleoplasm; C:cytosol	EC:2	Transferases
jg30082	1	1607.14	6.39835e-17	rab GTPase-activating protein 1 isoform X1	3279	P:GO:0006886; P:GO:0015833; P:GO:0031338; P:GO:0090630; F:GO:0005096; F:GO:0015631; F:GO:0031267; C:GO:0005813; C:GO:0005829; C:GO:0005875; C:GO:0012505	P:intracellular protein transport; P:peptide transport; P:regulation of vesicle fusion; P:activation of GTPase activity; F:GTPase activator activity; F:tubulin binding; F:small GTPase binding; C:centrosome; C:cytosol; C:microtubule associated complex; C:endomembrane system	NA	NA
jg30093	1	162.402	1.04988e-19	protein FAM163B	534	C:GO:0016021	C:integral component of membrane	NA	NA
jg30120	1	384.113	2.50707e-29	calcium/calmodulin-dependent protein kinase kinase 2-like isoform X1	1785	P:GO:0000165; P:GO:0006468; P:GO:0010628; P:GO:0018105; P:GO:0018107; P:GO:0018108; P:GO:0032147; P:GO:0032793; P:GO:0034614; P:GO:0045893; P:GO:0046777; P:GO:0061762; P:GO:1903599; F:GO:0004672; F:GO:0004683; F:GO:0004713; F:GO:0005509; F:GO:0005516; F:GO:0005524; F:GO:0030295; C:GO:0005634; C:GO:0005829; C:GO:0042995	P:MAPK cascade; P:protein phosphorylation; P:positive regulation of gene expression; P:peptidyl-serine phosphorylation; P:peptidyl-threonine phosphorylation; P:peptidyl-tyrosine phosphorylation; P:activation of protein kinase activity; P:positive regulation of CREB transcription factor activity; P:cellular response to reactive oxygen species; P:positive regulation of transcription, DNA-templated;…	EC:2.7.1; EC:2.7; EC:2; EC:2.7.11.17	Transferring phosphorus-containing groups; Transferring phosphorus-containing groups; Transferases; Calcium/calmodulin-dependent protein kinase
jg30124	1	843.921	2.01248e-23	breakpoint cluster region protein	4164	P:GO:0002692; P:GO:0003014; P:GO:0006468; P:GO:0007420; P:GO:0015833; P:GO:0018108; P:GO:0030036; P:GO:0035556; P:GO:0042472; P:GO:0043114; P:GO:0043314; P:GO:0043547; P:GO:0045807; P:GO:0046777; P:GO:0048008; P:GO:0048872; P:GO:0050728; P:GO:0050766; P:GO:0050885; P:GO:0051056; P:GO:0051171; P:GO:0051704; P:GO:0051726; P:GO:0060216; P:GO:0060268; P:GO:0060313; P:GO:0065002; P:GO:0071222; P:GO:20…	P:negative regulation of cellular extravasation; P:renal system process; P:protein phosphorylation; P:brain development; P:peptide transport; P:peptidyl-tyrosine phosphorylation; P:actin cytoskeleton organization; P:intracellular signal transduction; P:inner ear morphogenesis; P:regulation of vascular permeability; P:negative regulation of neutrophil degranulation; P:positive regulation of GTPase…	EC:2.7.1; EC:2.7.11.1; EC:2.7; EC:2	Transferring phosphorus-containing groups; Non-specific serine/threonine protein kinase; Transferring phosphorus-containing groups; Transferases
jg30129	1	539.149	4.13829e-60	RIMS-binding protein 2 isoform X2	4314	P:GO:0007274; P:GO:0010923; P:GO:0048789; P:GO:1990709; F:GO:0005515; C:GO:0048788	P:neuromuscular synaptic transmission; P:negative regulation of phosphatase activity; P:cytoskeletal matrix organization at active zone; P:presynaptic active zone organization; F:protein binding; C:cytoskeleton of presynaptic active zone	NA	NA
jg30133	1	173.318	1.871e-36	transmembrane protein 132C-like	3246	P:GO:0010923; C:GO:0016021	P:negative regulation of phosphatase activity; C:integral component of membrane	NA	NA
jg30158	1	1231.03	1.71909e-75	ankyrin-1 isoform X2	5700	P:GO:0006779; P:GO:0006887; P:GO:0006888; P:GO:0007010; P:GO:0010638; P:GO:0045199; P:GO:0048821; P:GO:0055072; P:GO:0072659; P:GO:0098662; F:GO:0005200; F:GO:0008093; F:GO:0030507; F:GO:0051117; C:GO:0005634; C:GO:0005829; C:GO:0014731; C:GO:0016323; C:GO:0016529; C:GO:0030018; C:GO:0030673; C:GO:0030863; C:GO:0031430; C:GO:0042383; C:GO:0045211; C:GO:0099568	P:porphyrin-containing compound biosynthetic process; P:exocytosis; P:endoplasmic reticulum to Golgi vesicle-mediated transport; P:cytoskeleton organization; P:positive regulation of organelle organization; P:maintenance of epithelial cell apical/basal polarity; P:erythrocyte development; P:iron ion homeostasis; P:protein localization to plasma membrane; P:inorganic cation transmembrane transport…	NA	NA
jg30165	1	895.544	2.08288e-15	poly [ADP-ribose] polymerase tankyrase-1 isoform X1	3846	P:GO:0016055; P:GO:0032212; P:GO:0051225; P:GO:0070212; P:GO:0090263; P:GO:0090364; P:GO:2000060; F:GO:0003950; F:GO:0097110	P:Wnt signaling pathway; P:positive regulation of telomere maintenance via telomerase; P:spindle assembly; P:protein poly-ADP-ribosylation; P:positive regulation of canonical Wnt signaling pathway; P:regulation of proteasome assembly; P:positive regulation of ubiquitin-dependent protein catabolic process; F:NAD+ ADP-ribosyltransferase activity; F:scaffold protein binding	EC:2.4.2; EC:2.4; EC:2; EC:2.4.2.30	Glycosyltransferases; Glycosyltransferases; Transferases; NAD(+) ADP-ribosyltransferase
jg30182	1	622.527	1.25763e-39	phospholipid phosphatase-related protein type 1 isoform X1	975	P:GO:0006644; P:GO:0007165; P:GO:0007399; P:GO:0016311; P:GO:0046839; F:GO:0008195; F:GO:0042577; C:GO:0005654; C:GO:0005887; C:GO:0016021	P:phospholipid metabolic process; P:signal transduction; P:nervous system development; P:dephosphorylation; P:phospholipid dephosphorylation; F:phosphatidate phosphatase activity; F:lipid phosphatase activity; C:nucleoplasm; C:integral component of plasma membrane; C:integral component of membrane	EC:3.1; EC:3; EC:3.1.3.4; EC:3.1.3	Acting on ester bonds; Hydrolases; Phosphatidate phosphatase; Acting on ester bonds
jg30206	1	780.137	6.83101e-50	very low-density lipoprotein receptor isoform X1	2595	P:GO:0000122; P:GO:0006869; P:GO:0006897; P:GO:0006898; P:GO:0007411; P:GO:0007507; P:GO:0007584; P:GO:0007613; P:GO:0008203; P:GO:0009410; P:GO:0010629; P:GO:0015833; P:GO:0021517; P:GO:0021987; P:GO:0032147; P:GO:0032802; P:GO:0032869; P:GO:0034436; P:GO:0034447; P:GO:0038026; P:GO:0042149; P:GO:0045666; P:GO:0048813; P:GO:0050769; P:GO:0051704; P:GO:0061098; P:GO:0071222; P:GO:0071347; P:GO:00…	P:negative regulation of transcription by RNA polymerase II; P:lipid transport; P:endocytosis; P:receptor-mediated endocytosis; P:axon guidance; P:heart development; P:response to nutrient; P:memory; P:cholesterol metabolic process; P:response to xenobiotic stimulus; P:negative regulation of gene expression; P:peptide transport; P:ventral spinal cord development; P:cerebral cortex development; P:…	EC:7	Translocases
jg30219	1	300.445	1.54558e-79	regulator of G-protein signaling 7-binding protein B-like	756	NA	NA	NA	NA
jg30234	1	943.657	2.36277e-38	amyloid-beta A4 precursor protein-binding family A member 1-like	3189	NA	NA	NA	NA
jg30254	1	248.557	3.851e-36	voltage-dependent N-type calcium channel subunit alpha-1B isoform X3	4173	NA	NA	NA	NA
jg30255	1	410.218	3.43246e-65	voltage-dependent N-type calcium channel subunit alpha-1B isoform X8	1710	NA	NA	NA	NA
jg30263	1	4049.17	7.71002e-134	syntaxin-binding protein 1a isoform X1	1863	P:GO:0000281; P:GO:0002066; P:GO:0002576; P:GO:0002888; P:GO:0006904; P:GO:0007274; P:GO:0007317; P:GO:0007412; P:GO:0009416; P:GO:0009725; P:GO:0010807; P:GO:0015031; P:GO:0016188; P:GO:0016192; P:GO:0030707; P:GO:0031630; P:GO:0032229; P:GO:0032355; P:GO:0032388; P:GO:0035544; P:GO:0043306; P:GO:0043524; P:GO:0045026; P:GO:0045666; P:GO:0045956; P:GO:0045995; P:GO:0050769; P:GO:0050821; P:GO:00…	P:mitotic cytokinesis; P:columnar/cuboidal epithelial cell development; P:platelet degranulation; P:positive regulation of myeloid leukocyte mediated immunity; P:vesicle docking involved in exocytosis; P:neuromuscular synaptic transmission; P:regulation of pole plasm oskar mRNA localization; P:axon target recognition; P:response to light stimulus; P:response to hormone; P:regulation of synaptic v…	NA	NA
jg30272	1	3452.45	4.77646e-107	glutamate receptor ionotropic, NMDA 1a isoform X2	2706	P:GO:0000413; P:GO:0006457; P:GO:0007268; P:GO:0007616; P:GO:0007626; P:GO:0008355; P:GO:0009410; P:GO:0009636; P:GO:0034220; P:GO:0035235; P:GO:0042331; P:GO:0042391; P:GO:0043059; P:GO:0046677; P:GO:0048149; P:GO:0050975; P:GO:0055074; P:GO:0072375; P:GO:0098655; F:GO:0003755; F:GO:0004970; F:GO:0004972; F:GO:0022839; C:GO:0016021; C:GO:0017146; C:GO:0043005; C:GO:0045211	P:protein peptidyl-prolyl isomerization; P:protein folding; P:chemical synaptic transmission; P:long-term memory; P:locomotory behavior; P:olfactory learning; P:response to xenobiotic stimulus; P:response to toxic substance; P:ion transmembrane transport; P:ionotropic glutamate receptor signaling pathway; P:phototaxis; P:regulation of membrane potential; P:regulation of forward locomotion; P:resp…	EC:5.2.1.8; EC:5.2; EC:5; EC:7	Peptidylprolyl isomerase; Cis-trans-isomerases; Isomerases; Translocases
jg30328	1	747.354	3.34234e-19	PHD finger protein 24 isoform X1	1269	P:GO:0007214; P:GO:0008277; P:GO:0032228; P:GO:0050966; F:GO:0005509	P:gamma-aminobutyric acid signaling pathway; P:regulation of G protein-coupled receptor signaling pathway; P:regulation of synaptic transmission, GABAergic; P:detection of mechanical stimulus involved in sensory perception of pain; F:calcium ion binding	NA	NA
jg30334	1	655.788	8.76324e-30	protein unc-13 homolog B isoform X1	6105	P:GO:0002793; P:GO:0006887; P:GO:0007268; P:GO:0007283; P:GO:0007528; P:GO:0009967; P:GO:0010808; P:GO:0031914; P:GO:0032388; P:GO:0035249; P:GO:0035556; P:GO:0043051; P:GO:0043065; P:GO:0045956; P:GO:0046662; P:GO:0048172; P:GO:0050714; P:GO:0060282; P:GO:0060384; P:GO:0061669; P:GO:0061789; P:GO:0071333; P:GO:0090382; P:GO:0097151; P:GO:0097480; P:GO:0098693; P:GO:0099069; P:GO:0099525; P:GO:19…	P:positive regulation of peptide secretion; P:exocytosis; P:chemical synaptic transmission; P:spermatogenesis; P:neuromuscular junction development; P:positive regulation of signal transduction; P:positive regulation of synaptic vesicle priming; P:negative regulation of synaptic plasticity; P:positive regulation of intracellular transport; P:synaptic transmission, glutamatergic; P:intracellular s…	NA	NA
jg30367	1	1840.1	8.09815e-29	peptidyl-prolyl cis-trans isomerase-like	498	P:GO:0000413; P:GO:0006457; F:GO:0003755	P:protein peptidyl-prolyl isomerization; P:protein folding; F:peptidyl-prolyl cis-trans isomerase activity	EC:5.2.1.8; EC:5.2; EC:5	Peptidylprolyl isomerase; Cis-trans-isomerases; Isomerases
jg30382	1	422.784	8.85941e-93	seizure 6-like protein isoform X1	2823	P:GO:0008344; P:GO:0021680; P:GO:0060074; P:GO:0090036; C:GO:0005783; C:GO:0043025	P:adult locomotory behavior; P:cerebellar Purkinje cell layer development; P:synapse maturation; P:regulation of protein kinase C signaling; C:endoplasmic reticulum; C:neuronal cell body	NA	NA
jg30398	1	716.154	3.73991e-90	multiple C2 and transmembrane domain-containing protein 1 isoform X1	2694	P:GO:0019722; P:GO:0030336; P:GO:0045806; P:GO:0046928; P:GO:0048168; P:GO:0060341; P:GO:1902883; F:GO:0005509; C:GO:0005789; C:GO:0016021; C:GO:0030672; C:GO:0055037	P:calcium-mediated signaling; P:negative regulation of cell migration; P:negative regulation of endocytosis; P:regulation of neurotransmitter secretion; P:regulation of neuronal synaptic plasticity; P:regulation of cellular localization; P:negative regulation of response to oxidative stress; F:calcium ion binding; C:endoplasmic reticulum membrane; C:integral component of membrane; C:synaptic vesi…	NA	NA
jg30424	1	1166.93	2.88234e-35	WD repeat-containing protein 7 isoform X1	4626	P:GO:0002244; P:GO:0007035; P:GO:0008593; P:GO:0035149; C:GO:0008021	P:hematopoietic progenitor cell differentiation; P:vacuolar acidification; P:regulation of Notch signaling pathway; P:lumen formation, open tracheal system; C:synaptic vesicle	NA	NA
jg30431	1	561.206	3.03608e-66	hippocampus abundant transcript 1 protein	1533	P:GO:0055085; F:GO:0022857; C:GO:0016021	P:transmembrane transport; F:transmembrane transporter activity; C:integral component of membrane	EC:7	Translocases
jg30448	1	871.946	2.16501e-22	E3 ubiquitin-protein ligase TRIM23	1743	P:GO:0006471; P:GO:0016567; P:GO:0043085; F:GO:0003924; F:GO:0004842; F:GO:0005525; F:GO:0008047; F:GO:0008270; F:GO:0019003; F:GO:0032550; F:GO:0042802; C:GO:0000139; C:GO:0005634; C:GO:0005765; C:GO:0098791	P:protein ADP-ribosylation; P:protein ubiquitination; P:positive regulation of catalytic activity; F:GTPase activity; F:ubiquitin-protein transferase activity; F:GTP binding; F:enzyme activator activity; F:zinc ion binding; F:GDP binding; F:purine ribonucleoside binding; F:identical protein binding; C:Golgi membrane; C:nucleus; C:lysosomal membrane; C:Golgi apparatus subcompartment	EC:3.6.1; EC:3.6; EC:2; EC:3; EC:2.3.2.27	Acting on acid anhydrides; Acting on acid anhydrides; Transferases; Hydrolases; RING-type E3 ubiquitin transferase
jg30467	1	417.257	2.17261e-42	kinesin-like protein KIF2A	2199	P:GO:0006890; P:GO:0007018; P:GO:0007057; P:GO:0007079; P:GO:0007288; P:GO:0009794; P:GO:0010938; P:GO:0018991; P:GO:0019886; P:GO:0030334; P:GO:0030953; P:GO:0045167; P:GO:0045995; P:GO:0051296; P:GO:0051661; P:GO:0061867; P:GO:0065008; P:GO:0070462; P:GO:0071539; P:GO:0090307; P:GO:0098534; P:GO:1903436; P:GO:1905503; P:GO:1905515; P:GO:1905833; F:GO:0003777; F:GO:0005524; F:GO:0008017; F:GO:00…	P:retrograde vesicle-mediated transport, Golgi to endoplasmic reticulum; P:microtubule-based movement; P:spindle assembly involved in female meiosis I; P:mitotic chromosome movement towards spindle pole; P:sperm axoneme assembly; P:regulation of mitotic cell cycle, embryonic; P:cytoplasmic microtubule depolymerization; P:oviposition; P:antigen processing and presentation of exogenous peptide anti…	EC:3.6.1; EC:3.6; EC:3; EC:5.6.1.3	Acting on acid anhydrides; Acting on acid anhydrides; Hydrolases; Plus-end-directed kinesin ATPase
jg30468	1	383.487	2.18277e-33	membrane-associated phosphatidylinositol transfer protein 2-like isoform X1	4284	P:GO:0007608; P:GO:0015711; P:GO:0015914; P:GO:0016059; P:GO:0046488; P:GO:0070588; F:GO:0005388; F:GO:0005548; F:GO:0008525; F:GO:0008526; F:GO:0016887; F:GO:0035091; F:GO:0042625; F:GO:0046872; F:GO:0070300; F:GO:1990050; C:GO:0005887; C:GO:0016029; C:GO:0035869; C:GO:0045202	P:sensory perception of smell; P:organic anion transport; P:phospholipid transport; P:deactivation of rhodopsin mediated signaling; P:phosphatidylinositol metabolic process; P:calcium ion transmembrane transport; F:P-type calcium transporter activity; F:phospholipid transporter activity; F:phosphatidylcholine transporter activity; F:phosphatidylinositol transfer activity; F:ATP hydrolysis activit…	EC:3.6.1; EC:7.2.2.10; EC:3.6; EC:3; EC:7	Acting on acid anhydrides; P-type Ca(2+) transporter; Acting on acid anhydrides; Hydrolases; Translocases
jg30474	1	353.342	7.52148e-17	N-lysine methyltransferase KMT5A-A	996	P:GO:0000077; P:GO:0000122; P:GO:0009953; P:GO:0010628; P:GO:0010629; P:GO:0030261; P:GO:0034771; P:GO:0034968; P:GO:0035067; P:GO:0043516; P:GO:1905268; P:GO:2001251; F:GO:0002039; F:GO:0003714; F:GO:0018024; F:GO:0042799; C:GO:0005634; C:GO:0005654; C:GO:0005694; C:GO:0005700; C:GO:0005829	P:DNA damage checkpoint signaling; P:negative regulation of transcription by RNA polymerase II; P:dorsal/ventral pattern formation; P:positive regulation of gene expression; P:negative regulation of gene expression; P:chromosome condensation; P:histone H4-K20 monomethylation; P:histone lysine methylation; P:negative regulation of histone acetylation; P:regulation of DNA damage response, signal tr…	EC:2.1; EC:2.1.1.43; EC:2; EC:2.1.1.354; EC:2.1.1	Transferring one-carbon groups; Transferring one-carbon groups; Transferases; [Histone H3]-lysine(4) N-trimethyltransferase; Transferring one-carbon groups
jg30481	1	1120.88	3.03114e-13	CAP-Gly domain-containing linker protein 1 isoform X1	2757	P:GO:0007017; P:GO:0007349; F:GO:0003779; F:GO:0051010; F:GO:0070854; C:GO:0000776; C:GO:0005794; C:GO:0005875; C:GO:0005876; C:GO:0035371; C:GO:0044295; C:GO:0045169	P:microtubule-based process; P:cellularization; F:actin binding; F:microtubule plus-end binding; F:myosin VI heavy chain binding; C:kinetochore; C:Golgi apparatus; C:microtubule associated complex; C:spindle microtubule; C:microtubule plus-end; C:axonal growth cone; C:fusome	NA	NA
jg30513	1	782.006	2.12692e-06	metal transporter CNNM3 isoform X2	2256	P:GO:0010960; C:GO:0016021	P:magnesium ion homeostasis; C:integral component of membrane	NA	NA
jg16355	1	3518.6	2.80376e-132	amphiphysin isoform X2	2187	P:GO:0007268; P:GO:0007612; P:GO:0043547; P:GO:0045807; P:GO:0048488; P:GO:0061024; P:GO:0098657; F:GO:0005543; F:GO:0008022; F:GO:0043168; F:GO:0044877; F:GO:0046982; C:GO:0005737; C:GO:0005829; C:GO:0015629; C:GO:0030672; C:GO:0031256; C:GO:0043195	P:chemical synaptic transmission; P:learning; P:positive regulation of GTPase activity; P:positive regulation of endocytosis; P:synaptic vesicle endocytosis; P:membrane organization; P:import into cell; F:phospholipid binding; F:protein C-terminus binding; F:anion binding; F:protein-containing complex binding; F:protein heterodimerization activity; C:cytoplasm; C:cytosol; C:actin cytoskeleton; C:…	NA	NA
jg16373	1	87.8322	3.3472e-31	nicotinamide/nicotinic acid mononucleotide adenylyltransferase 2	225	P:GO:0009435; P:GO:0019674; P:GO:0034628; F:GO:0000309; F:GO:0004515; F:GO:0005524; C:GO:0000139; C:GO:0005770; C:GO:0005802; C:GO:0030424; C:GO:0030659; C:GO:0045202	P:NAD biosynthetic process; P:NAD metabolic process; P:'de novo' NAD biosynthetic process from aspartate; F:nicotinamide-nucleotide adenylyltransferase activity; F:nicotinate-nucleotide adenylyltransferase activity; F:ATP binding; C:Golgi membrane; C:late endosome; C:trans-Golgi network; C:axon; C:cytoplasmic vesicle membrane; C:synapse	EC:2.7.7.1; EC:2.7; EC:2; EC:2.7.7; EC:2.7.7.18	Nicotinamide-nucleotide adenylyltransferase; Transferring phosphorus-containing groups; Transferases; Transferring phosphorus-containing groups; Nicotinate-nucleotide adenylyltransferase
jg16375	1	480.067	1.0642e-47	nicotinamide/nicotinic acid mononucleotide adenylyltransferase 2	720	P:GO:0009435; P:GO:0019674; P:GO:0034628; F:GO:0000309; F:GO:0004515; C:GO:0000139; C:GO:0005770; C:GO:0005802; C:GO:0045202	P:NAD biosynthetic process; P:NAD metabolic process; P:'de novo' NAD biosynthetic process from aspartate; F:nicotinamide-nucleotide adenylyltransferase activity; F:nicotinate-nucleotide adenylyltransferase activity; C:Golgi membrane; C:late endosome; C:trans-Golgi network; C:synapse	EC:2.7.7.1; EC:2.7; EC:2; EC:2.7.7; EC:2.7.7.18	Nicotinamide-nucleotide adenylyltransferase; Transferring phosphorus-containing groups; Transferases; Transferring phosphorus-containing groups; Nicotinate-nucleotide adenylyltransferase
jg16421	1	321.394	2.8832e-26	tomoregulin-1	1107	C:GO:0016021	C:integral component of membrane	NA	NA
jg16425	1	409.295	3.77784e-52	adenylate cyclase type 8 isoform X1	3714	P:GO:0006171; P:GO:0007186; P:GO:0035556; P:GO:0060282; P:GO:1900195; P:GO:1905881; F:GO:0004016; F:GO:0005524; F:GO:0046872; C:GO:0005886; C:GO:0016021	P:cAMP biosynthetic process; P:G protein-coupled receptor signaling pathway; P:intracellular signal transduction; P:positive regulation of oocyte development; P:positive regulation of oocyte maturation; P:positive regulation of oogenesis; F:adenylate cyclase activity; F:ATP binding; F:metal ion binding; C:plasma membrane; C:integral component of membrane	EC:4; EC:4.6; EC:4.6.1.1	Lyases; Phosphorus-oxygen lyases; Adenylate cyclase
jg16426	1	2774.18	1.45124e-229	brain acid soluble protein 1 homolog	645	NA	NA	NA	NA
jg16489	1	226.32	6.45888e-45	acid-sensing ion channel 1C isoform X3	1632	P:GO:0035725; F:GO:0015280; C:GO:0005886; C:GO:0016021	P:sodium ion transmembrane transport; F:ligand-gated sodium channel activity; C:plasma membrane; C:integral component of membrane	EC:7	Translocases
jg16495	1	1175.77	7.98251e-05	arf-GAP with GTPase, ANK repeat and PH domain-containing protein 3 isoform X1	4032	P:GO:0006606; P:GO:0015833; P:GO:0034614; P:GO:0036445; P:GO:0043161; P:GO:0048259; P:GO:0050790; P:GO:0055059; P:GO:0060582; P:GO:0072089; P:GO:0072375; P:GO:0090630; P:GO:0098722; F:GO:0003924; F:GO:0005096; F:GO:0005525; F:GO:0031593; F:GO:0046872; C:GO:0005634; C:GO:0005737; C:GO:0016020; C:GO:0071944	P:protein import into nucleus; P:peptide transport; P:cellular response to reactive oxygen species; P:neuronal stem cell division; P:proteasome-mediated ubiquitin-dependent protein catabolic process; P:regulation of receptor-mediated endocytosis; P:regulation of catalytic activity; P:asymmetric neuroblast division; P:cell fate determination involved in pattern specification; P:stem cell prolifera…	EC:3.6.1; EC:3.6; EC:3	Acting on acid anhydrides; Acting on acid anhydrides; Hydrolases
jg16549	1	506.156	2.04217e-90	phosphatase and actin regulator 1-like isoform X1	1773	P:GO:0031532; P:GO:0042325; P:GO:0043086; P:GO:0043149; P:GO:0048870; F:GO:0003779; F:GO:0004864; F:GO:0008157; C:GO:0005634; C:GO:0005737; C:GO:0005829; C:GO:0045202	P:actin cytoskeleton reorganization; P:regulation of phosphorylation; P:negative regulation of catalytic activity; P:stress fiber assembly; P:cell motility; F:actin binding; F:protein phosphatase inhibitor activity; F:protein phosphatase 1 binding; C:nucleus; C:cytoplasm; C:cytosol; C:synapse	NA	NA
jg16572	1	1430.26	3.23234e-34	zinc finger protein 521-like isoform X5	3717	P:GO:0006357; P:GO:0010628; P:GO:0010629; P:GO:0035277; P:GO:0045892; P:GO:0045893; P:GO:0048663; F:GO:0000981; F:GO:0019904; C:GO:0005654	P:regulation of transcription by RNA polymerase II; P:positive regulation of gene expression; P:negative regulation of gene expression; P:spiracle morphogenesis, open tracheal system; P:negative regulation of transcription, DNA-templated; P:positive regulation of transcription, DNA-templated; P:neuron fate commitment; F:DNA-binding transcription factor activity, RNA polymerase II-specific; F:prot…	NA	NA
jg16575	1	197.414	2.8344e-21	zinc finger protein 423-like	477	P:GO:0010628; P:GO:0010629; P:GO:0035277; P:GO:0045892; P:GO:0045944; P:GO:0048663; F:GO:0000978; F:GO:0001228; F:GO:0019904; F:GO:0046872; C:GO:0005654	P:positive regulation of gene expression; P:negative regulation of gene expression; P:spiracle morphogenesis, open tracheal system; P:negative regulation of transcription, DNA-templated; P:positive regulation of transcription by RNA polymerase II; P:neuron fate commitment; F:RNA polymerase II cis-regulatory region sequence-specific DNA binding; F:DNA-binding transcription activator activity, RNA …	NA	NA
jg16588	1	482.184	4.98049e-75	dipeptidyl aminopeptidase-like protein 6 isoform X1	2532	P:GO:0006508; P:GO:0019228; P:GO:0065009; P:GO:1901381; P:GO:1903078; F:GO:0004177; F:GO:0008236; F:GO:0008239; F:GO:0015459; C:GO:0008076; C:GO:0009986; C:GO:0016021; C:GO:0043025	P:proteolysis; P:neuronal action potential; P:regulation of molecular function; P:positive regulation of potassium ion transmembrane transport; P:positive regulation of protein localization to plasma membrane; F:aminopeptidase activity; F:serine-type peptidase activity; F:dipeptidyl-peptidase activity; F:potassium channel regulator activity; C:voltage-gated potassium channel complex; C:cell surfa…	EC:3.4.11; EC:3.4; EC:3.4.14.1; EC:3; EC:3.4.14.5; EC:3.4.14.4; EC:3.4.14.2	Acting on peptide bonds (peptidases); Acting on peptide bonds (peptidases); Dipeptidyl-peptidase I; Hydrolases; Dipeptidyl-peptidase IV; Dipeptidyl-peptidase III; Dipeptidyl-peptidase II
jg16591	1	796.399	2.9959e-27	pre-B-cell leukemia homeobox 1a isoform X1	1341	P:GO:0001658; P:GO:0001944; P:GO:0006357; P:GO:0007221; P:GO:0008284; P:GO:0009786; P:GO:0009952; P:GO:0009954; P:GO:0010628; P:GO:0010971; P:GO:0014036; P:GO:0030223; P:GO:0030278; P:GO:0030325; P:GO:0030326; P:GO:0035019; P:GO:0035162; P:GO:0042692; P:GO:0043433; P:GO:0045665; P:GO:0048337; P:GO:0048536; P:GO:0048538; P:GO:0048706; P:GO:0048795; P:GO:0050768; P:GO:0060216; P:GO:1905904; P:GO:20…	P:branching involved in ureteric bud morphogenesis; P:vasculature development; P:regulation of transcription by RNA polymerase II; P:positive regulation of transcription of Notch receptor target; P:positive regulation of cell population proliferation; P:regulation of asymmetric cell division; P:anterior/posterior pattern specification; P:proximal/distal pattern formation; P:positive regulation of…	NA	NA
jg16619	1	214.718	4.7098e-05	bcl-2-related ovarian killer protein homolog B	642	P:GO:0008630; P:GO:0042981; P:GO:0097192; F:GO:0042803; F:GO:0046982; C:GO:0005741; C:GO:0016020	P:intrinsic apoptotic signaling pathway in response to DNA damage; P:regulation of apoptotic process; P:extrinsic apoptotic signaling pathway in absence of ligand; F:protein homodimerization activity; F:protein heterodimerization activity; C:mitochondrial outer membrane; C:membrane	NA	NA
jg16623	1	3239.64	2.97951e-88	kinesin-like protein KIF1A isoform X1	5169	P:GO:0015833; P:GO:0022027; P:GO:0098840; P:GO:1990048; P:GO:1990049; F:GO:0003777; F:GO:0008017; F:GO:0016887; F:GO:0042803; C:GO:0005829; C:GO:0005871; C:GO:0005874; C:GO:0008021; C:GO:0030424; C:GO:0030425; C:GO:0043025; C:GO:0098794	P:peptide transport; P:interkinetic nuclear migration; P:protein transport along microtubule; P:anterograde neuronal dense core vesicle transport; P:retrograde neuronal dense core vesicle transport; F:microtubule motor activity; F:microtubule binding; F:ATP hydrolysis activity; F:protein homodimerization activity; C:cytosol; C:kinesin complex; C:microtubule; C:synaptic vesicle; C:axon; C:dendrite…	EC:3.6.1; EC:3.6; EC:3	Acting on acid anhydrides; Acting on acid anhydrides; Hydrolases
jg16625	1	1121.97	1.63323e-80	ras-related protein Rab-6B-like	627	P:GO:0006886; P:GO:0006890; P:GO:0006891; P:GO:0007293; P:GO:0007411; P:GO:0007602; P:GO:0007638; P:GO:0008103; P:GO:0008344; P:GO:0032482; P:GO:0034498; P:GO:0042147; P:GO:0045451; P:GO:0045467; P:GO:0050821; P:GO:0050832; P:GO:0060078; P:GO:0060471; P:GO:1900449; P:GO:1903539; P:GO:2000311; F:GO:0003924; F:GO:0005525; F:GO:0031489; F:GO:0032550; C:GO:0000138; C:GO:0005794; C:GO:0005829; C:GO:00…	P:intracellular protein transport; P:retrograde vesicle-mediated transport, Golgi to endoplasmic reticulum; P:intra-Golgi vesicle-mediated transport; P:germarium-derived egg chamber formation; P:axon guidance; P:phototransduction; P:mechanosensory behavior; P:oocyte microtubule cytoskeleton polarization; P:adult locomotory behavior; P:Rab protein signal transduction; P:early endosome to Golgi tra…	EC:3.6.1; EC:3.6; EC:3	Acting on acid anhydrides; Acting on acid anhydrides; Hydrolases
jg16634	1	319.98	6.36546e-59	tenascin-R isoform X1	3984	P:GO:0007155; P:GO:0007158; P:GO:0007411; P:GO:0008306; P:GO:0010771; P:GO:0022029; P:GO:0022408; P:GO:0030198; P:GO:0035641; P:GO:0045665; P:GO:0048692; P:GO:0050767; P:GO:0050805; P:GO:0050808; P:GO:0050885; P:GO:0051968; P:GO:0051971; P:GO:0060291; F:GO:0005178; F:GO:0046625; C:GO:0005576; C:GO:0009986; C:GO:0045121; C:GO:0062023; C:GO:0072534	P:cell adhesion; P:neuron cell-cell adhesion; P:axon guidance; P:associative learning; P:negative regulation of cell morphogenesis involved in differentiation; P:telencephalon cell migration; P:negative regulation of cell-cell adhesion; P:extracellular matrix organization; P:locomotory exploration behavior; P:negative regulation of neuron differentiation; P:negative regulation of axon extension i…	NA	NA
jg16649	1	945.174	4.87337e-46	schwannomin-interacting protein 1-like	735	NA	NA	NA	NA
jg16665	1	178.009	9.81473e-61	fibroblast growth factor 12 isoform X1	774	P:GO:0008543; F:GO:0008083	P:fibroblast growth factor receptor signaling pathway; F:growth factor activity	NA	NA
jg16669	1	1232.33	4.80431e-143	zinc finger CCCH domain-containing protein 13 isoform X1	3222	P:GO:0014065; P:GO:0048812	P:phosphatidylinositol 3-kinase signaling; P:neuron projection morphogenesis	NA	NA
jg16686	1	3509.3	6.03855e-80	secretogranin-2b	1809	P:GO:0000165; P:GO:0001937; P:GO:0001938; P:GO:0002790; P:GO:0006468; P:GO:0006954; P:GO:0009306; P:GO:0010469; P:GO:0043542; P:GO:0043687; P:GO:0048245; P:GO:0050930; P:GO:1903670; P:GO:2000352; P:GO:2001237; F:GO:0005125; F:GO:0042056; C:GO:0005576; C:GO:0005615; C:GO:0005788; C:GO:0030141; C:GO:0098992	P:MAPK cascade; P:negative regulation of endothelial cell proliferation; P:positive regulation of endothelial cell proliferation; P:peptide secretion; P:protein phosphorylation; P:inflammatory response; P:protein secretion; P:regulation of signaling receptor activity; P:endothelial cell migration; P:post-translational protein modification; P:eosinophil chemotaxis; P:induction of positive chemotax…	NA	NA
jg16720	1	1047.8	8.42999e-12	calmodulin-regulated spectrin-associated protein 2 isoform X2	4545	P:GO:0031113; P:GO:0031175; P:GO:0045664; P:GO:0050767; P:GO:0050773; P:GO:0061564; P:GO:1903358; F:GO:0005516; F:GO:0008017; F:GO:0030507; F:GO:0051011; C:GO:0005737; C:GO:0005829; C:GO:0005874; C:GO:0036449	P:regulation of microtubule polymerization; P:neuron projection development; P:regulation of neuron differentiation; P:regulation of neurogenesis; P:regulation of dendrite development; P:axon development; P:regulation of Golgi organization; F:calmodulin binding; F:microtubule binding; F:spectrin binding; F:microtubule minus-end binding; C:cytoplasm; C:cytosol; C:microtubule; C:microtubule minus-e…	NA	NA
jg16721	1	647.167	5.80694e-08	WD repeat-containing protein 47	2790	NA	NA	NA	NA
jg16736	1	2530.73	8.22261e-53	neurocan core protein-like	3675	P:GO:0007155; F:GO:0005509; F:GO:0005540; F:GO:0030246; C:GO:0005576; C:GO:0016021	P:cell adhesion; F:calcium ion binding; F:hyaluronic acid binding; F:carbohydrate binding; C:extracellular region; C:integral component of membrane	NA	NA
jg16753	1	179.221	6.98738e-48	potassium/sodium hyperpolarization-activated cyclic nucleotide-gated channel 2-like	3498	P:GO:0006954; P:GO:0007420; P:GO:0007637; P:GO:0008340; P:GO:0009636; P:GO:0014059; P:GO:0016057; P:GO:0035725; P:GO:0045475; P:GO:0045938; P:GO:0060341; P:GO:0071320; P:GO:0071321; P:GO:0071484; P:GO:0071632; P:GO:0071805; P:GO:0072718; P:GO:0086012; P:GO:0097327; P:GO:0098719; P:GO:1903294; P:GO:1904045; P:GO:1990573; P:GO:2001023; F:GO:0005198; F:GO:0005222; F:GO:0005248; F:GO:0005249; F:GO:00…	P:inflammatory response; P:brain development; P:proboscis extension reflex; P:determination of adult lifespan; P:response to toxic substance; P:regulation of dopamine secretion; P:regulation of membrane potential in photoreceptor cell; P:sodium ion transmembrane transport; P:locomotor rhythm; P:positive regulation of circadian sleep/wake cycle, sleep; P:regulation of cellular localization; P:cell…	EC:7	Translocases
jg16783	1	286.433	1.09006e-24	semaphorin-6B-like	2613	F:GO:0030215; C:GO:0005887	F:semaphorin receptor binding; C:integral component of plasma membrane	NA	NA
jg16786	1	2773.41	4.9947e-52	receptor-type tyrosine-protein phosphatase S-like isoform X2	5895	NA	NA	EC:3.1.3.48	Protein-tyrosine-phosphatase
jg16804	1	522.229	1.75073e-67	rap guanine nucleotide exchange factor 4-like isoform X1	2991	P:GO:0002793; P:GO:0007186; P:GO:0007264; P:GO:0007420; P:GO:0007507; P:GO:0014911; P:GO:0017156; P:GO:0017157; P:GO:0019933; P:GO:0021510; P:GO:0045664; P:GO:0050714; P:GO:0050767; P:GO:0050773; P:GO:0050790; P:GO:0050796; P:GO:0050805; P:GO:0061548; P:GO:1901423; P:GO:1904457; P:GO:1990090; F:GO:0005085; F:GO:0030552; F:GO:0031267; F:GO:0044877; C:GO:0001750; C:GO:0001917; C:GO:0005829; C:GO:00…	P:positive regulation of peptide secretion; P:G protein-coupled receptor signaling pathway; P:small GTPase mediated signal transduction; P:brain development; P:heart development; P:positive regulation of smooth muscle cell migration; P:calcium-ion regulated exocytosis; P:regulation of exocytosis; P:cAMP-mediated signaling; P:spinal cord development; P:regulation of neuron differentiation; P:posit…	NA	NA
jg16818	1	586.106	2.21666e-70	calsyntenin-2	2853	P:GO:0007156; P:GO:0008355; P:GO:0016339; P:GO:0034613; P:GO:0044331; P:GO:0050806; P:GO:0051965; F:GO:0005158; F:GO:0005509; C:GO:0000139; C:GO:0005615; C:GO:0005789; C:GO:0005887; C:GO:0009986; C:GO:0014069; C:GO:0016021; C:GO:0030424; C:GO:0032809; C:GO:0042995; C:GO:0045202; C:GO:0045211; C:GO:0098791	P:homophilic cell adhesion via plasma membrane adhesion molecules; P:olfactory learning; P:calcium-dependent cell-cell adhesion via plasma membrane cell adhesion molecules; P:cellular protein localization; P:cell-cell adhesion mediated by cadherin; P:positive regulation of synaptic transmission; P:positive regulation of synapse assembly; F:insulin receptor binding; F:calcium ion binding; C:Golgi …	NA	NA
jg16825	1	993.701	3.95343e-08	ras-related protein Rab-11B	657	P:GO:0000916; P:GO:0002066; P:GO:0006898; P:GO:0007112; P:GO:0007298; P:GO:0007317; P:GO:0007349; P:GO:0007394; P:GO:0008103; P:GO:0016360; P:GO:0019730; P:GO:0022416; P:GO:0030703; P:GO:0030718; P:GO:0030723; P:GO:0031532; P:GO:0032456; P:GO:0032467; P:GO:0032482; P:GO:0032989; P:GO:0034334; P:GO:0042052; P:GO:0042078; P:GO:0042998; P:GO:0045886; P:GO:0046664; P:GO:0048137; P:GO:0048210; P:GO:00…	P:actomyosin contractile ring contraction; P:columnar/cuboidal epithelial cell development; P:receptor-mediated endocytosis; P:male meiosis cytokinesis; P:border follicle cell migration; P:regulation of pole plasm oskar mRNA localization; P:cellularization; P:dorsal closure, elongation of leading edge cells; P:oocyte microtubule cytoskeleton polarization; P:sensory organ precursor cell fate deter…	EC:3.6.1; EC:3.6; EC:3	Acting on acid anhydrides; Acting on acid anhydrides; Hydrolases
jg16836	1	447.876	2.79575e-21	ras-related protein Rab-3A-like	660	P:GO:0003016; P:GO:0006886; P:GO:0007005; P:GO:0007274; P:GO:0007409; P:GO:0009791; P:GO:0014047; P:GO:0016188; P:GO:0017158; P:GO:0030324; P:GO:0031630; P:GO:0032386; P:GO:0032482; P:GO:0032781; P:GO:0036465; P:GO:0043312; P:GO:0043687; P:GO:0045054; P:GO:0046717; P:GO:0048172; P:GO:0048790; P:GO:0050975; P:GO:0051602; P:GO:0061670; P:GO:0097480; P:GO:0098693; P:GO:1900271; P:GO:1902803; P:GO:19…	P:respiratory system process; P:intracellular protein transport; P:mitochondrion organization; P:neuromuscular synaptic transmission; P:axonogenesis; P:post-embryonic development; P:glutamate secretion; P:synaptic vesicle maturation; P:regulation of calcium ion-dependent exocytosis; P:lung development; P:regulation of synaptic vesicle fusion to presynaptic active zone membrane; P:regulation of in…	EC:3.6.1; EC:3.6; EC:3	Acting on acid anhydrides; Acting on acid anhydrides; Hydrolases
jg16868	1	479.401	2.7348e-65	protein ABHD8	1443	F:GO:0016787; C:GO:0016021	F:hydrolase activity; C:integral component of membrane	EC:3	Hydrolases
jg16912	1	238.509	3.01212e-23	mitochondrial fission factor homolog A-like	864	P:GO:0002790; P:GO:0009306; P:GO:0090087; P:GO:0090141; P:GO:0090314; F:GO:0042803; C:GO:0005739; C:GO:0005777; C:GO:0005789; C:GO:0016021	P:peptide secretion; P:protein secretion; P:regulation of peptide transport; P:positive regulation of mitochondrial fission; P:positive regulation of protein targeting to membrane; F:protein homodimerization activity; C:mitochondrion; C:peroxisome; C:endoplasmic reticulum membrane; C:integral component of membrane	NA	NA
jg16917	1	2185.2	1.2368e-158	sodium/potassium-transporting ATPase subunit beta-3	840	P:GO:0006813; P:GO:0006814; C:GO:0005890	P:potassium ion transport; P:sodium ion transport; C:sodium:potassium-exchanging ATPase complex	NA	NA
jg16927	1	217.742	8.00374e-31	protein FAM78B	858	C:GO:0016021	C:integral component of membrane	NA	NA
jg16964	1	573.804	3.71009e-33	ephrin type-B receptor 3	2187	P:GO:0007411; P:GO:0007413; P:GO:0010769; P:GO:0016477; P:GO:0018108; P:GO:0022407; P:GO:0034446; P:GO:0043087; P:GO:0045664; P:GO:0046777; P:GO:0048013; P:GO:0050767; P:GO:0050770; P:GO:0051965; P:GO:0060997; F:GO:0005003; F:GO:0005524; C:GO:0005887	P:axon guidance; P:axonal fasciculation; P:regulation of cell morphogenesis involved in differentiation; P:cell migration; P:peptidyl-tyrosine phosphorylation; P:regulation of cell-cell adhesion; P:substrate adhesion-dependent cell spreading; P:regulation of GTPase activity; P:regulation of neuron differentiation; P:protein autophosphorylation; P:ephrin receptor signaling pathway; P:regulation of…	EC:2.7.10.1; EC:2.7.1; EC:2.7; EC:2	Receptor protein-tyrosine kinase; Transferring phosphorus-containing groups; Transferring phosphorus-containing groups; Transferases
jg16970	1	547.894	1.24878e-08	TSC22 domain family protein 2-like isoform X2	1830	P:GO:0006357; F:GO:0000981; C:GO:0005634; C:GO:0005737	P:regulation of transcription by RNA polymerase II; F:DNA-binding transcription factor activity, RNA polymerase II-specific; C:nucleus; C:cytoplasm	NA	NA
jg17026	1	460.322	2.49428e-38	low-density lipoprotein receptor-related protein 8-like isoform X1	2973	P:GO:0000122; P:GO:0001523; P:GO:0006508; P:GO:0006898; P:GO:0010629; P:GO:0019221; P:GO:0021517; P:GO:0021541; P:GO:0021819; P:GO:0032793; P:GO:0038026; P:GO:0045666; P:GO:0050804; P:GO:0061003; P:GO:0061098; P:GO:0098657; P:GO:1900006; F:GO:0005041; F:GO:0008035; F:GO:0019894; F:GO:0030229; F:GO:0034185; F:GO:0038025; F:GO:0048306; C:GO:0005615; C:GO:0005875; C:GO:0005901; C:GO:0014069; C:GO:00…	P:negative regulation of transcription by RNA polymerase II; P:retinoid metabolic process; P:proteolysis; P:receptor-mediated endocytosis; P:negative regulation of gene expression; P:cytokine-mediated signaling pathway; P:ventral spinal cord development; P:ammon gyrus development; P:layer formation in cerebral cortex; P:positive regulation of CREB transcription factor activity; P:reelin-mediated …	NA	NA
jg17050	1	365.903	2.53359e-81	hypothetical protein EPR50_G00129170	336	NA	NA	NA	NA
jg17051	1	3745.66	3.84867e-118	dynamin-3	2502	P:GO:0000266; P:GO:0003374; P:GO:0006897; P:GO:0007416; P:GO:0010771; P:GO:0016185; P:GO:0042713; P:GO:0045665; P:GO:0046907; P:GO:0050774; P:GO:0051491; P:GO:0051668; P:GO:0060341; P:GO:0061002; P:GO:0061025; P:GO:0097480; P:GO:0098657; P:GO:0098693; P:GO:0098884; P:GO:1903423; P:GO:1905809; P:GO:2000171; F:GO:0003924; F:GO:0005525; F:GO:0008017; F:GO:0031798; F:GO:0031802; F:GO:0042802; F:GO:00…	P:mitochondrial fission; P:dynamin family protein polymerization involved in mitochondrial fission; P:endocytosis; P:synapse assembly; P:negative regulation of cell morphogenesis involved in differentiation; P:synaptic vesicle budding from presynaptic endocytic zone membrane; P:sperm ejaculation; P:negative regulation of neuron differentiation; P:intracellular transport; P:negative regulation of …	EC:3.6.1; EC:3.6; EC:3; EC:3.6.5.5	Acting on acid anhydrides; Acting on acid anhydrides; Hydrolases; Dynamin GTPase
jg17055	1	659.882	1.20587e-31	disabled homolog 1-like isoform X1	1749	P:GO:0002119; P:GO:0002790; P:GO:0007349; P:GO:0007391; P:GO:0008045; P:GO:0009306; P:GO:0018991; P:GO:0040010; P:GO:0040017; P:GO:0042051; P:GO:0042395; P:GO:0045500; P:GO:0045807; P:GO:0048488; P:GO:0072583; P:GO:0098657; F:GO:0005118; F:GO:0017124; F:GO:0032050; F:GO:0042169; C:GO:0005798; C:GO:0005938; C:GO:0030424; C:GO:0031234; C:GO:0099568	P:nematode larval development; P:peptide secretion; P:cellularization; P:dorsal closure; P:motor neuron axon guidance; P:protein secretion; P:oviposition; P:positive regulation of growth rate; P:positive regulation of locomotion; P:compound eye photoreceptor development; P:ecdysis, collagen and cuticulin-based cuticle; P:sevenless signaling pathway; P:positive regulation of endocytosis; P:synapti…	NA	NA
jg17062	1	327.358	2.85675e-61	regulator of G-protein signaling 11	1422	P:GO:0002119; P:GO:0007186; P:GO:0007212; P:GO:0008277; P:GO:0009968; P:GO:0030845; P:GO:0032094; P:GO:0035556; P:GO:0040013; P:GO:0043051; P:GO:0043547; P:GO:0046662; P:GO:0050804; F:GO:0005096; F:GO:0031681; C:GO:0005737; C:GO:0005886; C:GO:0032991; C:GO:0044292	P:nematode larval development; P:G protein-coupled receptor signaling pathway; P:dopamine receptor signaling pathway; P:regulation of G protein-coupled receptor signaling pathway; P:negative regulation of signal transduction; P:phospholipase C-inhibiting G protein-coupled receptor signaling pathway; P:response to food; P:intracellular signal transduction; P:negative regulation of locomotion; P:re…	NA	NA
jg17100	1	321.92	8.48551e-72	pituitary adenylate cyclase-activating polypeptide type I receptor-like isoform X2	1428	P:GO:0007166; P:GO:0007186; P:GO:0007202; P:GO:0009410; P:GO:0009636; P:GO:0009725; P:GO:0010524; P:GO:0032355; P:GO:0033555; P:GO:0043950; P:GO:0045471; P:GO:0046545; P:GO:0046677; P:GO:0051057; P:GO:0060548; P:GO:0060732; F:GO:0001634; F:GO:0004999; F:GO:0008179; F:GO:0031267; F:GO:0042923; C:GO:0000139; C:GO:0005768; C:GO:0005791; C:GO:0005886; C:GO:0005887; C:GO:0005901; C:GO:0005923; C:GO:00…	P:cell surface receptor signaling pathway; P:G protein-coupled receptor signaling pathway; P:activation of phospholipase C activity; P:response to xenobiotic stimulus; P:response to toxic substance; P:response to hormone; P:positive regulation of calcium ion transport into cytosol; P:response to estradiol; P:multicellular organismal response to stress; P:positive regulation of cAMP-mediated signa…	NA	NA
jg17123	1	1206.46	2.13224e-41	adenylate cyclase activating polypeptide 1b isoform X1	705	P:GO:0001541; P:GO:0001662; P:GO:0001821; P:GO:0002865; P:GO:0002878; P:GO:0006805; P:GO:0006836; P:GO:0007187; P:GO:0007189; P:GO:0007190; P:GO:0007204; P:GO:0007218; P:GO:0007565; P:GO:0008277; P:GO:0008284; P:GO:0009150; P:GO:0009167; P:GO:0009205; P:GO:0009636; P:GO:0010469; P:GO:0010656; P:GO:0010976; P:GO:0019233; P:GO:0021983; P:GO:0030073; P:GO:0032755; P:GO:0032880; P:GO:0034260; P:GO:00…	P:ovarian follicle development; P:behavioral fear response; P:histamine secretion; P:negative regulation of acute inflammatory response to antigenic stimulus; P:negative regulation of acute inflammatory response to non-antigenic stimulus; P:xenobiotic metabolic process; P:neurotransmitter transport; P:G protein-coupled receptor signaling pathway, coupled to cyclic nucleotide second messenger; P:a…	NA	NA
jg17156	1	482.335	4.46308e-62	receptor-type tyrosine-protein phosphatase mu-like isoform X7	4626	P:GO:0035335; F:GO:0004725; C:GO:0016021	P:peptidyl-tyrosine dephosphorylation; F:protein tyrosine phosphatase activity; C:integral component of membrane	EC:3.1; EC:3.1.3.48; EC:3; EC:3.1.3	Acting on ester bonds; Protein-tyrosine-phosphatase; Hydrolases; Acting on ester bonds
jg17161	1	738.945	2.41073e-28	GTP-binding protein Rheb	555	P:GO:0000082; P:GO:0005975; P:GO:0006629; P:GO:0007264; P:GO:0007430; P:GO:0008286; P:GO:0010507; P:GO:0010770; P:GO:0010942; P:GO:0010976; P:GO:0016241; P:GO:0030307; P:GO:0030856; P:GO:0032008; P:GO:0035264; P:GO:0042594; P:GO:0042632; P:GO:0045176; P:GO:0045666; P:GO:0045727; P:GO:0045786; P:GO:0045793; P:GO:0045887; P:GO:0048168; P:GO:0048714; P:GO:0050772; P:GO:0050921; P:GO:0090070; P:GO:19…	P:G1/S transition of mitotic cell cycle; P:carbohydrate metabolic process; P:lipid metabolic process; P:small GTPase mediated signal transduction; P:terminal branching, open tracheal system; P:insulin receptor signaling pathway; P:negative regulation of autophagy; P:positive regulation of cell morphogenesis involved in differentiation; P:positive regulation of cell death; P:positive regulation of…	EC:3.6.1; EC:3.6; EC:3; EC:3.6.5.1; EC:3.6.5.2	Acting on acid anhydrides; Acting on acid anhydrides; Hydrolases; Heterotrimeric G-protein GTPase; Small monomeric GTPase
jg17172	1	130.988	9.9761e-62	netrin-G1-like isoform X1	1374	P:GO:0007409; P:GO:0099560; F:GO:0098632; C:GO:0005576; C:GO:0046658	P:axonogenesis; P:synaptic membrane adhesion; F:cell-cell adhesion mediator activity; C:extracellular region; C:anchored component of plasma membrane	NA	NA
jg17204	1	726.192	5.33509e-96	caytaxin-like	1068	NA	NA	NA	NA
jg17227	1	179.02	3.59958e-16	RNA-binding Raly-like protein	876	F:GO:0003723	F:RNA binding	NA	NA
jg17232	1	495.044	4.16978e-97	transmembrane protein 200C	1569	C:GO:0016021	C:integral component of membrane	NA	NA
jg17248	1	1526.36	2.39474e-23	microtubule cross-linking factor 1 isoform X4	5847	P:GO:0001578; P:GO:0010506; P:GO:0045197; P:GO:0051345; P:GO:0090087; P:GO:0090314; F:GO:0008017; F:GO:0042803; C:GO:0000922; C:GO:0005615; C:GO:0016324; C:GO:0016327; C:GO:0016328; C:GO:0030496; C:GO:0097427	P:microtubule bundle formation; P:regulation of autophagy; P:establishment or maintenance of epithelial cell apical/basal polarity; P:positive regulation of hydrolase activity; P:regulation of peptide transport; P:positive regulation of protein targeting to membrane; F:microtubule binding; F:protein homodimerization activity; C:spindle pole; C:extracellular space; C:apical plasma membrane; C:apic…	NA	NA
jg17253	1	671.192	1.81361e-10	metallophosphoesterase 1	1185	P:GO:0006506; P:GO:0006888; F:GO:0008081; F:GO:0030145; F:GO:0034235; F:GO:0043168; C:GO:0005654; C:GO:0005794; C:GO:0005801; C:GO:0016021; C:GO:0033116; C:GO:0070971	P:GPI anchor biosynthetic process; P:endoplasmic reticulum to Golgi vesicle-mediated transport; F:phosphoric diester hydrolase activity; F:manganese ion binding; F:GPI anchor binding; F:anion binding; C:nucleoplasm; C:Golgi apparatus; C:cis-Golgi network; C:integral component of membrane; C:endoplasmic reticulum-Golgi intermediate compartment membrane; C:endoplasmic reticulum exit site	EC:3.1.4; EC:3.1; EC:3	Acting on ester bonds; Acting on ester bonds; Hydrolases
jg17254	1	694.391	7.2065e-24	guanine nucleotide-binding protein G(olf) subunit alpha isoform X2	1140	P:GO:0007186; P:GO:0060282; P:GO:0090038; P:GO:1900195; P:GO:1905881; P:GO:2000114; P:GO:2000292; F:GO:0003924; F:GO:0005525; F:GO:0031683	P:G protein-coupled receptor signaling pathway; P:positive regulation of oocyte development; P:negative regulation of protein kinase C signaling; P:positive regulation of oocyte maturation; P:positive regulation of oogenesis; P:regulation of establishment of cell polarity; P:regulation of defecation; F:GTPase activity; F:GTP binding; F:G-protein beta/gamma-subunit complex binding	EC:3.6.1; EC:3.6; EC:3	Acting on acid anhydrides; Acting on acid anhydrides; Hydrolases
jg17278	1	236.996	7.65936e-57	alpha-N-acetylgalactosaminide alpha-2,6-sialyltransferase 5	1005	P:GO:0006486; P:GO:0006688; P:GO:0009312; P:GO:0018279; P:GO:0097503; F:GO:0001665; F:GO:0008373; C:GO:0000139; C:GO:0005794; C:GO:0016021; C:GO:0098791	P:protein glycosylation; P:glycosphingolipid biosynthetic process; P:oligosaccharide biosynthetic process; P:protein N-linked glycosylation via asparagine; P:sialylation; F:alpha-N-acetylgalactosaminide alpha-2,6-sialyltransferase activity; F:sialyltransferase activity; C:Golgi membrane; C:Golgi apparatus; C:integral component of membrane; C:Golgi apparatus subcompartment	EC:2.4.99.3; EC:2.4; EC:2	Alpha-N-acetylgalactosaminide alpha-2,6-sialyltransferase; Glycosyltransferases; Transferases
jg17317	1	375.108	4.68561e-28	kin of IRRE-like protein 1b isoform X2	2424	P:GO:0001933; P:GO:0007156; P:GO:0007157; P:GO:0007267; P:GO:0007416; P:GO:0007523; P:GO:0007588; P:GO:0008039; P:GO:0010830; P:GO:0016202; P:GO:0022603; P:GO:0030838; P:GO:0036059; P:GO:0046667; P:GO:0048668; P:GO:0048755; P:GO:0051017; P:GO:0061321; P:GO:0097206; P:GO:1901739; P:GO:2000026; F:GO:0017022; F:GO:0030165; F:GO:0050839; C:GO:0005912; C:GO:0005917; C:GO:0009986; C:GO:0016021; C:GO:00…	P:negative regulation of protein phosphorylation; P:homophilic cell adhesion via plasma membrane adhesion molecules; P:heterophilic cell-cell adhesion via plasma membrane cell adhesion molecules; P:cell-cell signaling; P:synapse assembly; P:larval visceral muscle development; P:excretion; P:synaptic target recognition; P:regulation of myotube differentiation; P:regulation of striated muscle tissu…	NA	NA
jg17329	1	461.182	5.08107e-49	G protein-activated inward rectifier potassium channel 3	1503	P:GO:0034765; P:GO:0071805; P:GO:1990573; F:GO:0015467; F:GO:0022839; F:GO:0030165; C:GO:0005887; C:GO:0016021	P:regulation of ion transmembrane transport; P:potassium ion transmembrane transport; P:potassium ion import across plasma membrane; F:G-protein activated inward rectifier potassium channel activity; F:ion gated channel activity; F:PDZ domain binding; C:integral component of plasma membrane; C:integral component of membrane	EC:7	Translocases
jg17330	1	226.353	2.60002e-84	junctional protein associated with coronary artery disease	4245	P:GO:0001934; P:GO:0043410; P:GO:0090050; P:GO:1900748; P:GO:1903589; P:GO:1903672; C:GO:0005911; C:GO:0005912; C:GO:0032587; C:GO:0048471	P:positive regulation of protein phosphorylation; P:positive regulation of MAPK cascade; P:positive regulation of cell migration involved in sprouting angiogenesis; P:positive regulation of vascular endothelial growth factor signaling pathway; P:positive regulation of blood vessel endothelial cell proliferation involved in sprouting angiogenesis; P:positive regulation of sprouting angiogenesis; C…	NA	NA
jg17344	1	186.421	4.35882e-17	cyclin-Y-like isoform X1	1038	P:GO:0000079; P:GO:0000086; P:GO:0045737; P:GO:0048589; P:GO:0050767; P:GO:0051301; P:GO:0051964; P:GO:0060828; P:GO:1904799; P:GO:2000331; F:GO:0016538; F:GO:0019901; C:GO:0000308; C:GO:0005634; C:GO:0005886; C:GO:0030424; C:GO:0030425	P:regulation of cyclin-dependent protein serine/threonine kinase activity; P:G2/M transition of mitotic cell cycle; P:positive regulation of cyclin-dependent protein serine/threonine kinase activity; P:developmental growth; P:regulation of neurogenesis; P:cell division; P:negative regulation of synapse assembly; P:regulation of canonical Wnt signaling pathway; P:regulation of neuron remodeling; P…	EC:2.7.1	Transferring phosphorus-containing groups
jg17361	1	1916.24	1.34593e-27	receptor-type tyrosine-protein phosphatase N2-like isoform X1	3006	P:GO:0007165; P:GO:0007269; P:GO:0034260; P:GO:0035335; P:GO:0035773; P:GO:0043312; P:GO:0048565; P:GO:0051046; F:GO:0005001; C:GO:0005788; C:GO:0005887; C:GO:0030672; C:GO:0043195; C:GO:0043235; C:GO:0101003	P:signal transduction; P:neurotransmitter secretion; P:negative regulation of GTPase activity; P:peptidyl-tyrosine dephosphorylation; P:insulin secretion involved in cellular response to glucose stimulus; P:neutrophil degranulation; P:digestive tract development; P:regulation of secretion; F:transmembrane receptor protein tyrosine phosphatase activity; C:endoplasmic reticulum lumen; C:integral co…	EC:3.1; EC:3.1.3.48; EC:3; EC:3.1.3	Acting on ester bonds; Protein-tyrosine-phosphatase; Hydrolases; Acting on ester bonds
jg17401	1	446.235	2.45176e-71	cadherin-24 isoform X1	4986	P:GO:0007156; F:GO:0005509; C:GO:0005886; C:GO:0016021	P:homophilic cell adhesion via plasma membrane adhesion molecules; F:calcium ion binding; C:plasma membrane; C:integral component of membrane	NA	NA
jg17402	1	707.568	1.06254e-15	capping protein, Arp2/3 and myosin-I linker protein 3 isoform X1	4254	P:GO:0010769; P:GO:0030334; P:GO:0035021; P:GO:0045664; P:GO:0048841; P:GO:0050767; P:GO:0050770; P:GO:1902667; F:GO:0032794; C:GO:0005737; C:GO:0005886	P:regulation of cell morphogenesis involved in differentiation; P:regulation of cell migration; P:negative regulation of Rac protein signal transduction; P:regulation of neuron differentiation; P:regulation of axon extension involved in axon guidance; P:regulation of neurogenesis; P:regulation of axonogenesis; P:regulation of axon guidance; F:GTPase activating protein binding; C:cytoplasm; C:plas…	NA	NA
jg17404	1	397.741	1.47096e-27	GTP-binding protein REM 2	912	P:GO:0071542; F:GO:0003925; F:GO:0005246; F:GO:0005525	P:dopaminergic neuron differentiation; F:G protein activity; F:calcium channel regulator activity; F:GTP binding	EC:3.6.1; EC:3.6; EC:3; EC:3.6.5.1; EC:3.6.5.2	Acting on acid anhydrides; Acting on acid anhydrides; Hydrolases; Heterotrimeric G-protein GTPase; Small monomeric GTPase
jg17439	1	690.56	1.07636e-78	astrotactin-1 isoform X1	3723	P:GO:0001764; P:GO:0007158; P:GO:0007626; C:GO:0005768; C:GO:0009897; C:GO:0016021	P:neuron migration; P:neuron cell-cell adhesion; P:locomotory behavior; C:endosome; C:external side of plasma membrane; C:integral component of membrane	NA	NA
jg17442	1	211.173	3.75466e-35	BMP/retinoic acid-inducible neural-specific protein 2	2112	P:GO:0045666; P:GO:0045930	P:positive regulation of neuron differentiation; P:negative regulation of mitotic cell cycle	NA	NA
jg17470	1	682.803	6.4918e-08	polypyrimidine tract-binding protein 2-like	1572	P:GO:0006376; P:GO:0006397; P:GO:0007291; P:GO:0007319; P:GO:0008103; P:GO:0008380; P:GO:0008586; P:GO:0008587; P:GO:0021510; P:GO:0021549; P:GO:0033119; P:GO:2000177; F:GO:0000900; F:GO:0003723; F:GO:0003730; F:GO:0036002; C:GO:0005634; C:GO:0005681; C:GO:0005737; C:GO:0030426; C:GO:0043025	P:mRNA splice site selection; P:mRNA processing; P:sperm individualization; P:negative regulation of oskar mRNA translation; P:oocyte microtubule cytoskeleton polarization; P:RNA splicing; P:imaginal disc-derived wing vein morphogenesis; P:imaginal disc-derived wing margin morphogenesis; P:spinal cord development; P:cerebellum development; P:negative regulation of RNA splicing; P:regulation of ne…	NA	NA
jg17478	1	718.595	6.28747e-42	kinesin-associated protein 3-like isoform X1	2334	P:GO:0006890; P:GO:0007165; P:GO:0007605; P:GO:0007608; P:GO:0008089; P:GO:0008104; P:GO:0008285; P:GO:0019886; P:GO:0030951; P:GO:0035720; P:GO:0035735; P:GO:0043066; P:GO:0046587; P:GO:0065003; P:GO:0072383; P:GO:1902856; P:GO:1902857; F:GO:0003777; F:GO:0017111; F:GO:0019894; C:GO:0000794; C:GO:0005783; C:GO:0005794; C:GO:0005813; C:GO:0005829; C:GO:0005871; C:GO:0016939; C:GO:0030993; C:GO:00…	P:retrograde vesicle-mediated transport, Golgi to endoplasmic reticulum; P:signal transduction; P:sensory perception of sound; P:sensory perception of smell; P:anterograde axonal transport; P:protein localization; P:negative regulation of cell population proliferation; P:antigen processing and presentation of exogenous peptide antigen via MHC class II; P:establishment or maintenance of microtubul…	EC:3.6.1; EC:3.6; EC:3	Acting on acid anhydrides; Acting on acid anhydrides; Hydrolases
jg17513	1	542.444	1.95642e-34	contactin-associated protein-like 2b	3948	P:GO:0003015; P:GO:0007163; P:GO:0007391; P:GO:0008039; P:GO:0008366; P:GO:0016080; P:GO:0016081; P:GO:0017156; P:GO:0019226; P:GO:0019991; P:GO:0021682; P:GO:0021756; P:GO:0021761; P:GO:0021794; P:GO:0030534; P:GO:0035151; P:GO:0035176; P:GO:0042297; P:GO:0045163; P:GO:0046907; P:GO:0048489; P:GO:0048812; P:GO:0051704; P:GO:0060857; P:GO:0061343; P:GO:0071109; P:GO:0071205; P:GO:0071625; P:GO:00…	P:heart process; P:establishment or maintenance of cell polarity; P:dorsal closure; P:synaptic target recognition; P:axon ensheathment; P:synaptic vesicle targeting; P:synaptic vesicle docking; P:calcium-ion regulated exocytosis; P:transmission of nerve impulse; P:septate junction assembly; P:nerve maturation; P:striatum development; P:limbic system development; P:thalamus development; P:adult be…	NA	NA
jg17522	1	373.323	1.48128e-53	dentin sialophosphoprotein-like isoform X3	2964	NA	NA	NA	NA
jg17525	1	215.742	2.07082e-57	disks large-associated protein 1-like isoform X1	3534	P:GO:0007268; P:GO:0035418; P:GO:0061136; P:GO:0070842; P:GO:0099562; F:GO:0019904; F:GO:0044877; F:GO:0098919; C:GO:0014069; C:GO:0045202; C:GO:0045211	P:chemical synaptic transmission; P:protein localization to synapse; P:regulation of proteasomal protein catabolic process; P:aggresome assembly; P:maintenance of postsynaptic density structure; F:protein domain specific binding; F:protein-containing complex binding; F:structural constituent of postsynaptic density; C:postsynaptic density; C:synapse; C:postsynaptic membrane	NA	NA
jg17531	1	638.102	4.34863e-42	dnaJ homolog subfamily B member 6-like	816	P:GO:0010629; P:GO:0030036; P:GO:0030198; P:GO:0032781; P:GO:0032880; P:GO:0034504; P:GO:0043154; P:GO:0045109; P:GO:0045892; P:GO:0060710; P:GO:0060715; P:GO:0060717; P:GO:0061077; P:GO:0090084; P:GO:1900034; F:GO:0001671; F:GO:0003677; F:GO:0008047; F:GO:0031072; F:GO:0042802; F:GO:0044183; F:GO:0051082; F:GO:0051087; F:GO:0060589; F:GO:0060590; C:GO:0005654; C:GO:0005813; C:GO:0005829; C:GO:00…	P:negative regulation of gene expression; P:actin cytoskeleton organization; P:extracellular matrix organization; P:positive regulation of ATPase activity; P:regulation of protein localization; P:protein localization to nucleus; P:negative regulation of cysteine-type endopeptidase activity involved in apoptotic process; P:intermediate filament organization; P:negative regulation of transcription,…	NA	NA
jg5506	1	290.552	2.30502e-59	RNA binding protein fox-1 homolog 1 isoform X1	1152	P:GO:0000381; P:GO:0006397; P:GO:0007474; P:GO:0007613; P:GO:0010628; P:GO:0017148; P:GO:0021854; P:GO:0030706; P:GO:0043484; P:GO:0045893; P:GO:0048641; P:GO:0050658; P:GO:0050885; P:GO:0060047; P:GO:2000026; P:GO:2001014; F:GO:0000976; F:GO:0003723; F:GO:0003730; F:GO:0008022; F:GO:0008134; C:GO:0005634; C:GO:0005802	P:regulation of alternative mRNA splicing, via spliceosome; P:mRNA processing; P:imaginal disc-derived wing vein specification; P:memory; P:positive regulation of gene expression; P:negative regulation of translation; P:hypothalamus development; P:germarium-derived oocyte differentiation; P:regulation of RNA splicing; P:positive regulation of transcription, DNA-templated; P:regulation of skeletal…	NA	NA
jg5511	1	300.833	7.60891e-41	F-box/LRR-repeat protein 16	1515	P:GO:0000209; P:GO:0031146; P:GO:0043687; F:GO:0004842; C:GO:0005829; C:GO:0019005	P:protein polyubiquitination; P:SCF-dependent proteasomal ubiquitin-dependent protein catabolic process; P:post-translational protein modification; F:ubiquitin-protein transferase activity; C:cytosol; C:SCF ubiquitin ligase complex	EC:2	Transferases
jg5517	1	751.381	1.77751e-28	next to BRCA1 gene 1 protein isoform X1	3801	P:GO:0001932; P:GO:0016236; P:GO:0030279; P:GO:0030500; P:GO:0032872; P:GO:0045668; P:GO:0051259; F:GO:0043130; F:GO:0051019; C:GO:0000407; C:GO:0005770; C:GO:0005776; C:GO:0005829; C:GO:0016604; C:GO:0031410	P:regulation of protein phosphorylation; P:macroautophagy; P:negative regulation of ossification; P:regulation of bone mineralization; P:regulation of stress-activated MAPK cascade; P:negative regulation of osteoblast differentiation; P:protein complex oligomerization; F:ubiquitin binding; F:mitogen-activated protein kinase binding; C:phagophore assembly site; C:late endosome; C:autophagosome; C:…	NA	NA
jg5582	1	3207.05	1.14262e-51	proline-rich protein 12	8319	P:GO:0001708; P:GO:0001764; P:GO:0002119; P:GO:0007265; P:GO:0016055; P:GO:0045138; P:GO:0051402; C:GO:0005634	P:cell fate specification; P:neuron migration; P:nematode larval development; P:Ras protein signal transduction; P:Wnt signaling pathway; P:nematode male tail tip morphogenesis; P:neuron apoptotic process; C:nucleus	NA	NA
jg5598	1	447.688	8.58049e-34	protein lin-7 homolog B	663	P:GO:0006887; P:GO:0007043; P:GO:0007269; P:GO:0015031; P:GO:0045199; P:GO:1903361; F:GO:0030165; F:GO:0097016; C:GO:0016323; C:GO:0097025; C:GO:0098793	P:exocytosis; P:cell-cell junction assembly; P:neurotransmitter secretion; P:protein transport; P:maintenance of epithelial cell apical/basal polarity; P:protein localization to basolateral plasma membrane; F:PDZ domain binding; F:L27 domain binding; C:basolateral plasma membrane; C:MPP7-DLG1-LIN7 complex; C:presynapse	NA	NA
jg5659	1	341.179	7.95991e-44	MAGUK p55 subfamily member 2a	1662	NA	NA	NA	NA
jg5734	1	402.887	3.58821e-08	RNA-binding protein FUS	1398	P:GO:0000398; P:GO:0006355; P:GO:0006367; P:GO:0008344; P:GO:0008345; P:GO:0045887; P:GO:0048749; P:GO:0071277; P:GO:1903508; F:GO:0003713; F:GO:0003723; F:GO:0003729; F:GO:0030331; F:GO:0031489; F:GO:0035255; F:GO:0042802; F:GO:0046872; F:GO:0046965; F:GO:0046966; F:GO:0051427; C:GO:0005634; C:GO:0005669; C:GO:0005844; C:GO:0043204; C:GO:0044327; C:GO:0048471	P:mRNA splicing, via spliceosome; P:regulation of transcription, DNA-templated; P:transcription initiation from RNA polymerase II promoter; P:adult locomotory behavior; P:larval locomotory behavior; P:positive regulation of synaptic assembly at neuromuscular junction; P:compound eye development; P:cellular response to calcium ion; P:positive regulation of nucleic acid-templated transcription; F:t…	NA	NA
jg5769	1	435.995	2.08034e-87	RNA binding protein fox-1 homolog 3-like isoform X6	1140	P:GO:0000381; P:GO:0006397; P:GO:0007399; P:GO:0007474; P:GO:0007613; P:GO:0010628; P:GO:0017148; P:GO:0030706; P:GO:0043484; P:GO:0045893; F:GO:0000976; F:GO:0003723; F:GO:0003730; F:GO:0008134; C:GO:0005634; C:GO:0005737; C:GO:0043204	P:regulation of alternative mRNA splicing, via spliceosome; P:mRNA processing; P:nervous system development; P:imaginal disc-derived wing vein specification; P:memory; P:positive regulation of gene expression; P:negative regulation of translation; P:germarium-derived oocyte differentiation; P:regulation of RNA splicing; P:positive regulation of transcription, DNA-templated; F:transcription cis-re…	NA	NA
jg5787	1	2649.43	2.08812e-114	HLF transcription factor, PAR bZIP family member a	891	P:GO:0000278; P:GO:0006259; P:GO:0006357; P:GO:0007275; P:GO:0007584; P:GO:0007623; P:GO:0010628; P:GO:0019216; P:GO:0040007; P:GO:0042023; P:GO:0045944; F:GO:0000977; F:GO:0001228; F:GO:0003677; F:GO:0003700; C:GO:0005634	P:mitotic cell cycle; P:DNA metabolic process; P:regulation of transcription by RNA polymerase II; P:multicellular organism development; P:response to nutrient; P:circadian rhythm; P:positive regulation of gene expression; P:regulation of lipid metabolic process; P:growth; P:DNA endoreduplication; P:positive regulation of transcription by RNA polymerase II; F:RNA polymerase II transcription regul…	NA	NA
jg5799	1	1180.56	2.64187e-87	growth arrest-specific protein 7a isoform X1	1263	NA	NA	NA	NA
jg5818	1	243.912	9.6718e-60	calcium channel, voltage-dependent, gamma subunit 2a	945	P:GO:0006612; P:GO:0007528; P:GO:0008333; P:GO:0015833; P:GO:0019226; P:GO:0034765; P:GO:0051592; P:GO:0051899; P:GO:0060081; P:GO:0060082; P:GO:0070588; P:GO:0098657; P:GO:0098943; P:GO:0098962; P:GO:0098970; P:GO:0098990; P:GO:0099590; P:GO:0099632; P:GO:1900451; P:GO:1904510; P:GO:2000969; F:GO:0005245; F:GO:0005246; F:GO:0022839; F:GO:0035255; C:GO:0005829; C:GO:0005891; C:GO:0009986; C:GO:00…	P:protein targeting to membrane; P:neuromuscular junction development; P:endosome to lysosome transport; P:peptide transport; P:transmission of nerve impulse; P:regulation of ion transmembrane transport; P:response to calcium ion; P:membrane depolarization; P:membrane hyperpolarization; P:eye blink reflex; P:calcium ion transmembrane transport; P:import into cell; P:neurotransmitter receptor tran…	EC:7	Translocases
jg5844	1	282.973	3.34041e-75	leucine-rich repeat-containing protein 4B	2205	P:GO:0006469; P:GO:0019221; P:GO:0046426; P:GO:0051965; P:GO:1902532; F:GO:0004860; F:GO:0005102; C:GO:0005737; C:GO:0005886; C:GO:0016021; C:GO:0044300	P:negative regulation of protein kinase activity; P:cytokine-mediated signaling pathway; P:negative regulation of receptor signaling pathway via JAK-STAT; P:positive regulation of synapse assembly; P:negative regulation of intracellular signal transduction; F:protein kinase inhibitor activity; F:signaling receptor binding; C:cytoplasm; C:plasma membrane; C:integral component of membrane; C:cerebe…	NA	NA
jg5847	1	694.424	7.2353e-57	synaptotagmin-C	1692	P:GO:0010976; P:GO:0017156; P:GO:0017158; P:GO:0031340; P:GO:0045666; P:GO:0046907; P:GO:0048489; P:GO:0048791; P:GO:0050769; P:GO:0051592; P:GO:0097480; P:GO:1903861; F:GO:0001786; F:GO:0005509; F:GO:0005544; F:GO:0005546; F:GO:0019905; F:GO:0030276; F:GO:0042803; F:GO:0046982; C:GO:0005768; C:GO:0005886; C:GO:0016021; C:GO:0045202	P:positive regulation of neuron projection development; P:calcium-ion regulated exocytosis; P:regulation of calcium ion-dependent exocytosis; P:positive regulation of vesicle fusion; P:positive regulation of neuron differentiation; P:intracellular transport; P:synaptic vesicle transport; P:calcium ion-regulated exocytosis of neurotransmitter; P:positive regulation of neurogenesis; P:response to c…	NA	NA
jg5848	1	209.096	3.20326e-48	hypothetical protein HST_G00165480	477	NA	NA	NA	NA
jg5851	1	968.36	3.33444e-81	SH3 and multiple ankyrin repeat domains protein 1	7344	P:GO:0007616; P:GO:0008306; P:GO:0030534; P:GO:0031646; P:GO:0032232; P:GO:0032507; P:GO:0035176; P:GO:0035418; P:GO:0042048; P:GO:0045666; P:GO:0046959; P:GO:0050769; P:GO:0050806; P:GO:0050885; P:GO:0050894; P:GO:0051704; P:GO:0060013; P:GO:0060074; P:GO:0060997; P:GO:0060999; P:GO:0065003; P:GO:0071625; P:GO:0099562; P:GO:1900006; P:GO:1900449; P:GO:2000311; P:GO:2000463; F:GO:0008022; F:GO:00…	P:long-term memory; P:associative learning; P:adult behavior; P:positive regulation of nervous system process; P:negative regulation of actin filament bundle assembly; P:maintenance of protein location in cell; P:social behavior; P:protein localization to synapse; P:olfactory behavior; P:positive regulation of neuron differentiation; P:habituation; P:positive regulation of neurogenesis; P:positiv…	NA	NA
jg5890	1	781.285	7.20204e-82	RUN domain-containing protein 3A isoform X2	1671	P:GO:0007264; P:GO:0031284; F:GO:0030250; F:GO:0030695; F:GO:0051428; C:GO:0005829; C:GO:0005886	P:small GTPase mediated signal transduction; P:positive regulation of guanylate cyclase activity; F:guanylate cyclase activator activity; F:GTPase regulator activity; F:peptide hormone receptor binding; C:cytosol; C:plasma membrane	NA	NA
jg5922	1	1120.44	1.63551e-52	MAGUK p55 subfamily member 3 isoform X1	1830	F:GO:0030165	F:PDZ domain binding	NA	NA
jg5925	1	258.236	1.99667e-78	G protein-activated inward rectifier potassium channel 1	1443	P:GO:0034765; P:GO:0071805; F:GO:0015467; C:GO:0016021	P:regulation of ion transmembrane transport; P:potassium ion transmembrane transport; F:G-protein activated inward rectifier potassium channel activity; C:integral component of membrane	EC:7	Translocases
jg5982	1	859.087	4.28316e-71	disintegrin and metalloproteinase domain-containing protein 11-like	2460	P:GO:0006508; P:GO:0006509; P:GO:0007229; P:GO:0045026; P:GO:0098609; F:GO:0004222; F:GO:0005178; C:GO:0005886; C:GO:0016021	P:proteolysis; P:membrane protein ectodomain proteolysis; P:integrin-mediated signaling pathway; P:plasma membrane fusion; P:cell-cell adhesion; F:metalloendopeptidase activity; F:integrin binding; C:plasma membrane; C:integral component of membrane	EC:3.4.24; EC:3.4; EC:3	Acting on peptide bonds (peptidases); Acting on peptide bonds (peptidases); Hydrolases
jg5993	1	390.409	6.82783e-67	zinc finger protein 385C isoform X1	1461	F:GO:0003676; F:GO:0008270; C:GO:0005634	F:nucleic acid binding; F:zinc ion binding; C:nucleus	NA	NA
jg6019	1	234.587	7.33517e-54	C1q-related factor	789	P:GO:0007626; P:GO:0016322; P:GO:0061743; P:GO:0099558; F:GO:0005102; C:GO:0005576; C:GO:0005737; C:GO:0016021; C:GO:0043083; C:GO:0044301; C:GO:0098793	P:locomotory behavior; P:neuron remodeling; P:motor learning; P:maintenance of synapse structure; F:signaling receptor binding; C:extracellular region; C:cytoplasm; C:integral component of membrane; C:synaptic cleft; C:climbing fiber; C:presynapse	NA	NA
jg6034	1	727.757	3.1934e-62	SRC kinase signaling inhibitor 1 isoform X1	5142	P:GO:0002792; P:GO:0007162; P:GO:0010769; P:GO:0030334; P:GO:0034446; P:GO:0045664; P:GO:0048814; P:GO:0050709; P:GO:0050767; P:GO:0060998; P:GO:0061001; P:GO:0061098; P:GO:0061099; F:GO:0019901; F:GO:0019904; C:GO:0005737; C:GO:0014069; C:GO:0015629; C:GO:0030027; C:GO:0030175; C:GO:0030424; C:GO:0030425; C:GO:0043025	P:negative regulation of peptide secretion; P:negative regulation of cell adhesion; P:regulation of cell morphogenesis involved in differentiation; P:regulation of cell migration; P:substrate adhesion-dependent cell spreading; P:regulation of neuron differentiation; P:regulation of dendrite morphogenesis; P:negative regulation of protein secretion; P:regulation of neurogenesis; P:regulation of de…	NA	NA
jg6039	1	8700.64	7.86544e-35	G patch domain-containing protein 8 isoform X1	4479	F:GO:0003676; F:GO:0046872	F:nucleic acid binding; F:metal ion binding	NA	NA
jg6050	1	162.73	2.09043e-67	protein ELFN1	2370	P:GO:0010923; P:GO:0050808; C:GO:0016021; C:GO:0030425; C:GO:0060076	P:negative regulation of phosphatase activity; P:synapse organization; C:integral component of membrane; C:dendrite; C:excitatory synapse	NA	NA
jg6063	1	218.896	6.76647e-25	axin-1 isoform X1	2547	P:GO:0000122; P:GO:0000209; P:GO:0001701; P:GO:0001743; P:GO:0006913; P:GO:0007367; P:GO:0007368; P:GO:0007450; P:GO:0007455; P:GO:0007507; P:GO:0007605; P:GO:0008587; P:GO:0009950; P:GO:0010628; P:GO:0010629; P:GO:0010800; P:GO:0010941; P:GO:0021797; P:GO:0021881; P:GO:0030511; P:GO:0030910; P:GO:0031101; P:GO:0031122; P:GO:0032147; P:GO:0032436; P:GO:0033138; P:GO:0033146; P:GO:0034244; P:GO:00…	P:negative regulation of transcription by RNA polymerase II; P:protein polyubiquitination; P:in utero embryonic development; P:lens placode formation; P:nucleocytoplasmic transport; P:segment polarity determination; P:determination of left/right symmetry; P:dorsal/ventral pattern formation, imaginal disc; P:eye-antennal disc morphogenesis; P:heart development; P:sensory perception of sound; P:ima…	NA	NA
jg6073	1	125.956	1.7465e-82	heparan sulfate glucosamine 3-O-sulfotransferase 4	1251	P:GO:0001745; P:GO:0007032; P:GO:0007040; P:GO:0007219; P:GO:0007474; P:GO:0008407; P:GO:0008586; P:GO:0008587; P:GO:0015012; P:GO:0016348; P:GO:0048190; P:GO:0050768; P:GO:0051036; F:GO:0008146; F:GO:0008467; C:GO:0005794; C:GO:0005796	P:compound eye morphogenesis; P:endosome organization; P:lysosome organization; P:Notch signaling pathway; P:imaginal disc-derived wing vein specification; P:chaeta morphogenesis; P:imaginal disc-derived wing vein morphogenesis; P:imaginal disc-derived wing margin morphogenesis; P:heparan sulfate proteoglycan biosynthetic process; P:imaginal disc-derived leg joint morphogenesis; P:wing disc dorsa…	EC:2.8.2.30; EC:2.8.2; EC:2; EC:2.8; EC:2.8.2.23	[Heparan sulfate]-glucosamine 3-sulfotransferase 3; Transferring sulfur-containing groups; Transferases; Transferring sulfur-containing groups; [Heparan sulfate]-glucosamine 3-sulfotransferase 1
jg6077	1	153.842	1.32992e-44	BAI1-associated protein 3	3435	P:GO:0001956; P:GO:0006887; P:GO:0007186; P:GO:0017158; P:GO:0032228; P:GO:0035774; P:GO:0042147; P:GO:0048584; P:GO:0050795; P:GO:1905413; P:GO:1990502; F:GO:0005509; F:GO:0005543; F:GO:0019905; F:GO:0043168; C:GO:0000139; C:GO:0005783; C:GO:0005829; C:GO:0005886; C:GO:0031902; C:GO:0032588; C:GO:0055038	P:positive regulation of neurotransmitter secretion; P:exocytosis; P:G protein-coupled receptor signaling pathway; P:regulation of calcium ion-dependent exocytosis; P:regulation of synaptic transmission, GABAergic; P:positive regulation of insulin secretion involved in cellular response to glucose stimulus; P:retrograde transport, endosome to Golgi; P:positive regulation of response to stimulus; …	NA	NA
jg6089	1	692.509	2.31506e-16	cell death-inducing p53-target protein 1	606	P:GO:0033209; P:GO:0042771; F:GO:0046872; C:GO:0005634; C:GO:0005765; C:GO:0098560; C:GO:0098574	P:tumor necrosis factor-mediated signaling pathway; P:intrinsic apoptotic signaling pathway in response to DNA damage by p53 class mediator; F:metal ion binding; C:nucleus; C:lysosomal membrane; C:cytoplasmic side of late endosome membrane; C:cytoplasmic side of lysosomal membrane	NA	NA
jg6101	1	489.735	6.32248e-80	protein sidekick-2 isoform X1	6702	P:GO:0007156; P:GO:0007416; P:GO:0010842; P:GO:0045216; P:GO:0060219; F:GO:0042802; C:GO:0005886; C:GO:0045202	P:homophilic cell adhesion via plasma membrane adhesion molecules; P:synapse assembly; P:retina layer formation; P:cell-cell junction organization; P:camera-type eye photoreceptor cell differentiation; F:identical protein binding; C:plasma membrane; C:synapse	NA	NA
jg6105	1	520.675	2.28779e-75	rho GTPase-activating protein 44 isoform X1	2961	P:GO:0002793; P:GO:0007165; P:GO:0007274; P:GO:0007480; P:GO:0010769; P:GO:0030837; P:GO:0035021; P:GO:0043547; P:GO:0045664; P:GO:0045887; P:GO:0048814; P:GO:0050767; P:GO:0060998; P:GO:0061001; P:GO:0098886; P:GO:0098887; P:GO:0099632; P:GO:1900144; P:GO:1990255; F:GO:0005096; F:GO:0005543; F:GO:0017124; F:GO:0031267; F:GO:0043168; C:GO:0005737; C:GO:0005829; C:GO:0014069; C:GO:0031256; C:GO:00…	P:positive regulation of peptide secretion; P:signal transduction; P:neuromuscular synaptic transmission; P:imaginal disc-derived leg morphogenesis; P:regulation of cell morphogenesis involved in differentiation; P:negative regulation of actin filament polymerization; P:negative regulation of Rac protein signal transduction; P:positive regulation of GTPase activity; P:regulation of neuron differe…	NA	NA
jg6157	1	794.391	9.06763e-68	adhesion G protein-coupled receptor L1 isoform X2	4572	P:GO:0007157; P:GO:0007166; P:GO:0007186; P:GO:0007420; P:GO:0035584; P:GO:0051965; P:GO:0090129; F:GO:0004930; F:GO:0015643; F:GO:0016524; F:GO:0030246; F:GO:0050839; C:GO:0005886; C:GO:0014069; C:GO:0016021; C:GO:0030424; C:GO:0030426; C:GO:0042734	P:heterophilic cell-cell adhesion via plasma membrane cell adhesion molecules; P:cell surface receptor signaling pathway; P:G protein-coupled receptor signaling pathway; P:brain development; P:calcium-mediated signaling using intracellular calcium source; P:positive regulation of synapse assembly; P:positive regulation of synapse maturation; F:G protein-coupled receptor activity; F:toxic substanc…	NA	NA
jg6186	1	1458.86	1.04375e-17	calmodulin-regulated spectrin-associated protein 3 isoform X1	4389	P:GO:0009792; P:GO:0010923; P:GO:0015833; P:GO:0030334; P:GO:0030951; P:GO:0031113; P:GO:0034453; P:GO:0045198; P:GO:0045218; P:GO:0051893; P:GO:0090136; P:GO:0098840; P:GO:1903358; P:GO:1903391; F:GO:0051011; F:GO:0051015; C:GO:0005737; C:GO:0005915; C:GO:0036449	P:embryo development ending in birth or egg hatching; P:negative regulation of phosphatase activity; P:peptide transport; P:regulation of cell migration; P:establishment or maintenance of microtubule cytoskeleton polarity; P:regulation of microtubule polymerization; P:microtubule anchoring; P:establishment of epithelial cell apical/basal polarity; P:zonula adherens maintenance; P:regulation of fo…	NA	NA
jg6195	1	627.15	4.12743e-61	noelin-2a isoform X1	1452	P:GO:0002790; P:GO:0007601; P:GO:0007626; P:GO:0009306; P:GO:0014032; P:GO:0051152; P:GO:1900239; P:GO:1905174; C:GO:0005576; C:GO:0005654; C:GO:0005737; C:GO:0032281; C:GO:0045202; C:GO:0097060	P:peptide secretion; P:visual perception; P:locomotory behavior; P:protein secretion; P:neural crest cell development; P:positive regulation of smooth muscle cell differentiation; P:regulation of phenotypic switching; P:regulation of vascular associated smooth muscle cell dedifferentiation; C:extracellular region; C:nucleoplasm; C:cytoplasm; C:AMPA glutamate receptor complex; C:synapse; C:synapti…	NA	NA
jg6208	1	402.058	7.54771e-88	cAMP-specific 3',5'-cyclic phosphodiesterase 4C isoform X3	2721	P:GO:0006198; P:GO:0007165; F:GO:0004115; F:GO:0046872	P:cAMP catabolic process; P:signal transduction; F:3',5'-cyclic-AMP phosphodiesterase activity; F:metal ion binding	EC:3.1.4; EC:3.1.4.17; EC:3.1; EC:3; EC:3.1.4.53	Acting on ester bonds; 3',5'-cyclic-nucleotide phosphodiesterase; Acting on ester bonds; Hydrolases; 3',5'-cyclic-AMP phosphodiesterase
jg6247	1	514.348	1.86784e-52	protein HID1	2403	P:GO:0002791; P:GO:0009408; P:GO:0030421; P:GO:0040011; P:GO:0040024; P:GO:0071244; P:GO:0071466; P:GO:0072347; P:GO:1903745; C:GO:0000138; C:GO:0005797; C:GO:0005829; C:GO:0016020; C:GO:0043005	P:regulation of peptide secretion; P:response to heat; P:defecation; P:locomotion; P:dauer larval development; P:cellular response to carbon dioxide; P:cellular response to xenobiotic stimulus; P:response to anesthetic; P:negative regulation of pharyngeal pumping; C:Golgi trans cisterna; C:Golgi medial cisterna; C:cytosol; C:membrane; C:neuron projection	NA	NA
jg6250	1	1560.73	2.29887e-23	BAH and coiled-coil domain-containing protein 1 isoform X2	8847	P:GO:0006338; P:GO:0007560; P:GO:0031497; P:GO:0031507; P:GO:0045892; F:GO:0000976; F:GO:0003682; C:GO:0000785; C:GO:0005654; C:GO:0005677; C:GO:0017053	P:chromatin remodeling; P:imaginal disc morphogenesis; P:chromatin assembly; P:heterochromatin assembly; P:negative regulation of transcription, DNA-templated; F:transcription cis-regulatory region binding; F:chromatin binding; C:chromatin; C:nucleoplasm; C:chromatin silencing complex; C:transcription repressor complex	NA	NA
jg6329	1	852.56	7.3782e-56	cAMP-dependent protein kinase type I-beta regulatory subunit isoform X1	1320	P:GO:0001932; P:GO:0050790; F:GO:0008603; F:GO:0016301; F:GO:0030552; C:GO:0005886; C:GO:0005952	P:regulation of protein phosphorylation; P:regulation of catalytic activity; F:cAMP-dependent protein kinase regulator activity; F:kinase activity; F:cAMP binding; C:plasma membrane; C:cAMP-dependent protein kinase complex	EC:2.7; EC:2	Transferring phosphorus-containing groups; Transferases
jg6334	1	2950.42	4.36464e-38	protein Z, vitamin K-dependent plasma glycoprotein a	1467	P:GO:0006508; P:GO:0007596; F:GO:0004252; F:GO:0005509; C:GO:0005576	P:proteolysis; P:blood coagulation; F:serine-type endopeptidase activity; F:calcium ion binding; C:extracellular region	EC:3.4.21; EC:3.4; EC:3; EC:3.4.21.6	Acting on peptide bonds (peptidases); Acting on peptide bonds (peptidases); Hydrolases; Coagulation factor Xa
jg6336	1	1199.15	1.20045e-19	G protein-coupled receptor, class C, group 5, member Ba isoform X1	1446	P:GO:0007186; P:GO:0007626; P:GO:0010976; P:GO:0032147; P:GO:0042593; P:GO:0043123; P:GO:0045666; P:GO:0050729; P:GO:0050769; P:GO:0050778; P:GO:0060907; P:GO:0061098; P:GO:0090263; F:GO:0001664; F:GO:0004930; F:GO:0019901; F:GO:0030295; C:GO:0005730; C:GO:0005829; C:GO:0005886; C:GO:0009986; C:GO:0016021; C:GO:0045121; C:GO:0070062	P:G protein-coupled receptor signaling pathway; P:locomotory behavior; P:positive regulation of neuron projection development; P:activation of protein kinase activity; P:glucose homeostasis; P:positive regulation of I-kappaB kinase/NF-kappaB signaling; P:positive regulation of neuron differentiation; P:positive regulation of inflammatory response; P:positive regulation of neurogenesis; P:positive…	NA	NA
jg6363	1	629.972	1.2774e-27	cytohesin-3 isoform X2	1185	P:GO:0007391; P:GO:0008586; P:GO:0014068; P:GO:0030100; P:GO:0032012; P:GO:0032014; P:GO:0032147; P:GO:0040018; P:GO:0043406; P:GO:0045785; P:GO:0046628; P:GO:0048193; P:GO:0050790; P:GO:0090162; P:GO:0110020; P:GO:2000481; F:GO:0005085; F:GO:0005547; F:GO:0042803; F:GO:0051020; C:GO:0000139; C:GO:0001726; C:GO:0005654; C:GO:0005829; C:GO:0005912; C:GO:0005923; C:GO:0030496; C:GO:0031234; C:GO:00…	P:dorsal closure; P:imaginal disc-derived wing vein morphogenesis; P:positive regulation of phosphatidylinositol 3-kinase signaling; P:regulation of endocytosis; P:regulation of ARF protein signal transduction; P:positive regulation of ARF protein signal transduction; P:activation of protein kinase activity; P:positive regulation of multicellular organism growth; P:positive regulation of MAP kina…	NA	NA
jg6370	1	865.319	1.55958e-76	testis-expressed protein 2 isoform X1	3591	F:GO:0008289; C:GO:0005783	F:lipid binding; C:endoplasmic reticulum	NA	NA
jg6406	1	1492.53	2.87267e-63	retinoic acid-induced protein 1	6231	P:GO:0001501; P:GO:0010628; P:GO:0032922; P:GO:0040015; P:GO:0045944; F:GO:0000987; F:GO:0003700; F:GO:0046872; C:GO:0005654; C:GO:0005739	P:skeletal system development; P:positive regulation of gene expression; P:circadian regulation of gene expression; P:negative regulation of multicellular organism growth; P:positive regulation of transcription by RNA polymerase II; F:cis-regulatory region sequence-specific DNA binding; F:DNA-binding transcription factor activity; F:metal ion binding; C:nucleoplasm; C:mitochondrion	NA	NA
jg6410	1	123.261	2.84747e-50	neuronal pentraxin-2a isoform X2	1347	P:GO:0008306; P:GO:0051966; C:GO:0005576; C:GO:0043160	P:associative learning; P:regulation of synaptic transmission, glutamatergic; C:extracellular region; C:acrosomal lumen	NA	NA
jg6414	1	448.366	1.35993e-52	tectonin beta-propeller repeat-containing protein 1	3579	C:GO:0000421; C:GO:0005765; C:GO:0016021	C:autophagosome membrane; C:lysosomal membrane; C:integral component of membrane	NA	NA
jg6445	1	1177.15	4.63307e-18	trinucleotide repeat-containing gene 6C protein isoform X3	5226	P:GO:0001700; P:GO:0006402; P:GO:0032880; P:GO:0035195; P:GO:0040029; P:GO:0045475; F:GO:0005515; C:GO:0000932; C:GO:1990904	P:embryonic development via the syncytial blastoderm; P:mRNA catabolic process; P:regulation of protein localization; P:gene silencing by miRNA; P:regulation of gene expression, epigenetic; P:locomotor rhythm; F:protein binding; C:P-body; C:ribonucleoprotein complex	NA	NA
jg6450	1	686.29	1.74371e-12	BUB3-interacting and GLEBS motif-containing protein ZNF207-like isoform X1	1410	P:GO:0007094; P:GO:0008608; P:GO:0048813; P:GO:0090307; F:GO:0008017; C:GO:0000776; C:GO:0005634; C:GO:0032991; C:GO:1990047	P:mitotic spindle assembly checkpoint signaling; P:attachment of spindle microtubules to kinetochore; P:dendrite morphogenesis; P:mitotic spindle assembly; F:microtubule binding; C:kinetochore; C:nucleus; C:protein-containing complex; C:spindle matrix	NA	NA
jg6451	1	308.887	2.57496e-13	protein Njmu-R1 isoform X1	1179	NA	NA	NA	NA
jg6487	1	461.935	1.28523e-39	voltage-dependent T-type calcium channel subunit alpha-1I isoform X1	7302	P:GO:0007165; P:GO:0019228; P:GO:0030317; P:GO:0035725; P:GO:0045956; P:GO:0060402; P:GO:0070509; P:GO:0070588; P:GO:0086010; F:GO:0005248; F:GO:0008332; F:GO:0022839; C:GO:0005891	P:signal transduction; P:neuronal action potential; P:flagellated sperm motility; P:sodium ion transmembrane transport; P:positive regulation of calcium ion-dependent exocytosis; P:calcium ion transport into cytosol; P:calcium ion import; P:calcium ion transmembrane transport; P:membrane depolarization during action potential; F:voltage-gated sodium channel activity; F:low voltage-gated calcium c…	EC:7	Translocases
jg6499	1	1863.67	2.12203e-127	seizure protein 6 homolog	2679	P:GO:0008344; P:GO:0021680; P:GO:0060074; P:GO:0090036; C:GO:0005783; C:GO:0043025	P:adult locomotory behavior; P:cerebellar Purkinje cell layer development; P:synapse maturation; P:regulation of protein kinase C signaling; C:endoplasmic reticulum; C:neuronal cell body	NA	NA
jg6525	1	3318.22	7.37963e-74	V-type proton ATPase 16 kDa proteolipid subunit	462	P:GO:0007042; P:GO:0015988; P:GO:1902600; F:GO:0008553; F:GO:0015078; F:GO:0016887; F:GO:0046961; C:GO:0000220; C:GO:0005774; C:GO:0016021; C:GO:0033179	P:lysosomal lumen acidification; P:energy coupled proton transmembrane transport, against electrochemical gradient; P:proton transmembrane transport; F:P-type proton-exporting transporter activity; F:proton transmembrane transporter activity; F:ATP hydrolysis activity; F:proton-transporting ATPase activity, rotational mechanism; C:vacuolar proton-transporting V-type ATPase, V0 domain; C:vacuolar …	EC:7.1.3.1; EC:3.6.1; EC:7.1.2.1; EC:3.6; EC:3; EC:7	H(+)-exporting diphosphatase; Acting on acid anhydrides; P-type H(+)-exporting transporter; Acting on acid anhydrides; Hydrolases; Translocases
jg6543	1	380.624	1.39083e-13	cerebellar degeneration-related protein 2-like	1437	P:GO:0040016; F:GO:0005515; C:GO:0005813; C:GO:0032154	P:embryonic cleavage; F:protein binding; C:centrosome; C:cleavage furrow	NA	NA
jg6551	1	483.647	8.64281e-92	neuronal pentraxin 1 like	1299	P:GO:0006839; P:GO:0007268; P:GO:0007417; P:GO:0035865; P:GO:0043653; P:GO:0060385; P:GO:0071333; C:GO:0005739; C:GO:0005886; C:GO:0043005	P:mitochondrial transport; P:chemical synaptic transmission; P:central nervous system development; P:cellular response to potassium ion; P:mitochondrial fragmentation involved in apoptotic process; P:axonogenesis involved in innervation; P:cellular response to glucose stimulus; C:mitochondrion; C:plasma membrane; C:neuron projection	NA	NA
jg6553	1	178.531	5.93104e-51	alpha-1,6-mannosylglycoprotein 6-beta-N-acetylglucosaminyltransferase B-like	2226	P:GO:0006487; F:GO:0030144; C:GO:0000139; C:GO:0016021	P:protein N-linked glycosylation; F:alpha-1,6-mannosylglycoprotein 6-beta-N-acetylglucosaminyltransferase activity; C:Golgi membrane; C:integral component of membrane	EC:2.4; EC:2; EC:2.4.1.155; EC:2.4.1	Glycosyltransferases; Transferases; Alpha-1,6-mannosyl-glycoprotein 6-beta-N-acetylglucosaminyltransferase; Glycosyltransferases
jg6570	1	584.314	1.69444e-33	voltage-dependent T-type calcium channel subunit alpha-1I-like isoform X1	7596	NA	NA	NA	NA
jg6574	1	454.18	3.39432e-110	glutamate receptor ionotropic, NMDA 2A	4224	P:GO:0000165; P:GO:0001508; P:GO:0001964; P:GO:0001975; P:GO:0006468; P:GO:0006805; P:GO:0007616; P:GO:0007626; P:GO:0008542; P:GO:0009611; P:GO:0009743; P:GO:0019722; P:GO:0021510; P:GO:0021766; P:GO:0021987; P:GO:0022008; P:GO:0030431; P:GO:0031646; P:GO:0033058; P:GO:0034220; P:GO:0035235; P:GO:0042133; P:GO:0042177; P:GO:0042220; P:GO:0042417; P:GO:0042428; P:GO:0043065; P:GO:0045471; P:GO:00…	P:MAPK cascade; P:action potential; P:startle response; P:response to amphetamine; P:protein phosphorylation; P:xenobiotic metabolic process; P:long-term memory; P:locomotory behavior; P:visual learning; P:response to wounding; P:response to carbohydrate; P:calcium-mediated signaling; P:spinal cord development; P:hippocampus development; P:cerebral cortex development; P:neurogenesis; P:sleep; P:p…	EC:7	Translocases
jg6607	1	500.541	3.77566e-75	synaptogyrin-3a	915	P:GO:0032411; P:GO:0045055; F:GO:0042169; F:GO:0047485; C:GO:0016021; C:GO:0030672; C:GO:0031594	P:positive regulation of transporter activity; P:regulated exocytosis; F:SH2 domain binding; F:protein N-terminus binding; C:integral component of membrane; C:synaptic vesicle membrane; C:neuromuscular junction	EC:1.8.3.2	Thiol oxidase
jg6646	1	415.655	3.96092e-51	glutamate receptor ionotropic, NMDA 2B	5160	P:GO:0007616; P:GO:0034220; P:GO:0035235; P:GO:0050975; P:GO:0072375; P:GO:0098655; F:GO:0004970; F:GO:0004972; F:GO:0022839; C:GO:0008328; C:GO:0016021; C:GO:0045211	P:long-term memory; P:ion transmembrane transport; P:ionotropic glutamate receptor signaling pathway; P:sensory perception of touch; P:medium-term memory; P:cation transmembrane transport; F:ionotropic glutamate receptor activity; F:NMDA glutamate receptor activity; F:ion gated channel activity; C:ionotropic glutamate receptor complex; C:integral component of membrane; C:postsynaptic membrane	EC:7	Translocases
jg6656	1	506.197	2.71421e-09	protein FAM234B	2166	C:GO:0016021	C:integral component of membrane	NA	NA
jg6686	1	196.121	2.01662e-36	protein Tob2	1212	P:GO:0001708; P:GO:0007283; P:GO:0008285; P:GO:0010468; P:GO:0023052; P:GO:0042006; P:GO:0045671; P:GO:0045778; P:GO:0060282; P:GO:1903507; P:GO:1905881; F:GO:0003714; F:GO:0042809; F:GO:0051427; C:GO:0005829; C:GO:0034399	P:cell fate specification; P:spermatogenesis; P:negative regulation of cell population proliferation; P:regulation of gene expression; P:signaling; P:masculinization of hermaphroditic germ-line; P:negative regulation of osteoclast differentiation; P:positive regulation of ossification; P:positive regulation of oocyte development; P:negative regulation of nucleic acid-templated transcription; P:po…	NA	NA
jg6705	1	294.352	8.10322e-45	equilibrative nucleoside transporter 4 isoform X1	1641	P:GO:0015844; P:GO:1901642; F:GO:0005337; F:GO:0008504; C:GO:0005886; C:GO:0016021	P:monoamine transport; P:nucleoside transmembrane transport; F:nucleoside transmembrane transporter activity; F:monoamine transmembrane transporter activity; C:plasma membrane; C:integral component of membrane	EC:7	Translocases
jg6706	1	4340.67	6.26172e-11	trinucleotide repeat-containing gene 18 protein isoform X1	9300	P:GO:0006338; P:GO:0007560; P:GO:0031497; P:GO:0031507; P:GO:0045892; F:GO:0000976; F:GO:0003682; C:GO:0000785; C:GO:0005654; C:GO:0005677; C:GO:0005739; C:GO:0005829; C:GO:0017053; C:GO:0031965	P:chromatin remodeling; P:imaginal disc morphogenesis; P:chromatin assembly; P:heterochromatin assembly; P:negative regulation of transcription, DNA-templated; F:transcription cis-regulatory region binding; F:chromatin binding; C:chromatin; C:nucleoplasm; C:chromatin silencing complex; C:mitochondrion; C:cytosol; C:transcription repressor complex; C:nuclear membrane	NA	NA
jg6733	1	447.735	4.14287e-89	GTPase IMAP family member 8	1071	F:GO:0005525	F:GTP binding	NA	NA
jg6741	1	286.204	7.65203e-70	neuronal pentraxin receptor	1659	C:GO:0016021	C:integral component of membrane	NA	NA
jg6744	1	107.696	1.0618e-19	GTPase IMAP family member 4	1470	F:GO:0005525; C:GO:0016021	F:GTP binding; C:integral component of membrane	NA	NA
jg6749	1	407.316	7.799e-05	desumoylating isopeptidase 1-like	507	P:GO:0006508; F:GO:0008233; F:GO:0042802	P:proteolysis; F:peptidase activity; F:identical protein binding	EC:3.4; EC:3	Acting on peptide bonds (peptidases); Hydrolases
jg6838	1	370.696	5.66955e-81	phospholipid phosphatase-related protein type 5-like isoform X1	1044	P:GO:0006644; P:GO:0007165; P:GO:0016311; P:GO:0046839; F:GO:0008195; F:GO:0042577; C:GO:0005887; C:GO:0016021	P:phospholipid metabolic process; P:signal transduction; P:dephosphorylation; P:phospholipid dephosphorylation; F:phosphatidate phosphatase activity; F:lipid phosphatase activity; C:integral component of plasma membrane; C:integral component of membrane	EC:3.1; EC:3; EC:3.1.3.4; EC:3.1.3	Acting on ester bonds; Hydrolases; Phosphatidate phosphatase; Acting on ester bonds
jg6854	1	872.972	4.84465e-76	caskin-1 isoform X1	4935	P:GO:0007165; F:GO:0019904; F:GO:0042802; C:GO:0005737; C:GO:0016020	P:signal transduction; F:protein domain specific binding; F:identical protein binding; C:cytoplasm; C:membrane	NA	NA
jg6876	1	366.284	2.55435e-17	serine/threonine-protein kinase BRSK2-like isoform X2	2262	P:GO:0006468; P:GO:0006487; P:GO:0007095; P:GO:0007269; P:GO:0007528; P:GO:0008306; P:GO:0009411; P:GO:0010769; P:GO:0018105; P:GO:0030010; P:GO:0045664; P:GO:0046777; P:GO:0048167; P:GO:0050767; P:GO:0050770; P:GO:0051298; P:GO:0090176; P:GO:0098693; P:GO:2000807; F:GO:0000287; F:GO:0004672; F:GO:0004674; F:GO:0005524; F:GO:0019901; F:GO:0043015; F:GO:0050321; C:GO:0005654; C:GO:0005813; C:GO:00…	P:protein phosphorylation; P:protein N-linked glycosylation; P:mitotic G2 DNA damage checkpoint signaling; P:neurotransmitter secretion; P:neuromuscular junction development; P:associative learning; P:response to UV; P:regulation of cell morphogenesis involved in differentiation; P:peptidyl-serine phosphorylation; P:establishment of cell polarity; P:regulation of neuron differentiation; P:protein…	EC:2.7.1; EC:2.7.11.26; EC:2.7.11.1; EC:2.7; EC:2	Transferring phosphorus-containing groups; [Tau protein] kinase; Non-specific serine/threonine protein kinase; Transferring phosphorus-containing groups; Transferases
jg6885	1	2224.62	2.83952e-90	vesicle-fusing ATPase isoform X1	2244	P:GO:0001921; P:GO:0002090; P:GO:0006813; P:GO:0006886; P:GO:0006890; P:GO:0006914; P:GO:0007030; P:GO:0008582; P:GO:0015833; P:GO:0016082; P:GO:0017156; P:GO:0017157; P:GO:0031629; P:GO:0035494; P:GO:0045026; P:GO:0045732; P:GO:0048172; P:GO:0048194; P:GO:0048208; P:GO:0048489; P:GO:0051960; P:GO:0060439; P:GO:0070050; P:GO:0090160; P:GO:0097480; P:GO:0098662; P:GO:1900073; F:GO:0008022; F:GO:00…	P:positive regulation of receptor recycling; P:regulation of receptor internalization; P:potassium ion transport; P:intracellular protein transport; P:retrograde vesicle-mediated transport, Golgi to endoplasmic reticulum; P:autophagy; P:Golgi organization; P:regulation of synaptic assembly at neuromuscular junction; P:peptide transport; P:synaptic vesicle priming; P:calcium-ion regulated exocytos…	EC:3.6.1; EC:3.6; EC:3; EC:3.6.4.6	Acting on acid anhydrides; Acting on acid anhydrides; Hydrolases; Vesicle-fusing ATPase
jg6907	1	695.493	3.98505e-16	histone deacetylase 5 isoform X1	3390	P:GO:0000122; P:GO:0002076; P:GO:0006338; P:GO:0006954; P:GO:0007399; P:GO:0007507; P:GO:0007616; P:GO:0009267; P:GO:0009410; P:GO:0010628; P:GO:0010832; P:GO:0016573; P:GO:0016575; P:GO:0030183; P:GO:0030279; P:GO:0031507; P:GO:0033555; P:GO:0042220; P:GO:0043393; P:GO:0045668; P:GO:0045843; P:GO:0045944; P:GO:0046627; P:GO:0048641; P:GO:0048742; P:GO:0051091; P:GO:0060359; P:GO:0061333; P:GO:00…	P:negative regulation of transcription by RNA polymerase II; P:osteoblast development; P:chromatin remodeling; P:inflammatory response; P:nervous system development; P:heart development; P:long-term memory; P:cellular response to starvation; P:response to xenobiotic stimulus; P:positive regulation of gene expression; P:negative regulation of myotube differentiation; P:histone acetylation; P:histo…	EC:3.5.1; EC:3.5.1.98; EC:3; EC:3.5	Acting on carbon-nitrogen bonds, other than peptide bonds; Histone deacetylase; Hydrolases; Acting on carbon-nitrogen bonds, other than peptide bonds
jg6918	1	1760.53	6.37413e-77	syntaxin-1B	867	P:GO:0000281; P:GO:0006836; P:GO:0006886; P:GO:0007271; P:GO:0007274; P:GO:0007317; P:GO:0007349; P:GO:0007482; P:GO:0008286; P:GO:0010468; P:GO:0010807; P:GO:0010977; P:GO:0015833; P:GO:0016081; P:GO:0017157; P:GO:0017158; P:GO:0019722; P:GO:0031629; P:GO:0031646; P:GO:0032386; P:GO:0040011; P:GO:0040014; P:GO:0045026; P:GO:0045665; P:GO:0045995; P:GO:0048791; P:GO:0050768; P:GO:0060025; P:GO:00…	P:mitotic cytokinesis; P:neurotransmitter transport; P:intracellular protein transport; P:synaptic transmission, cholinergic; P:neuromuscular synaptic transmission; P:regulation of pole plasm oskar mRNA localization; P:cellularization; P:haltere development; P:insulin receptor signaling pathway; P:regulation of gene expression; P:regulation of synaptic vesicle priming; P:negative regulation of ne…	NA	NA
jg28332	1	335.835	5.73107e-08	PH and SEC7 domain-containing protein 1-like	1308	P:GO:0007019; P:GO:0007077; P:GO:0010771; P:GO:0032012; P:GO:0033048; P:GO:0045665; P:GO:0045839; P:GO:0046602; P:GO:0046605; P:GO:0048692; P:GO:0050790; P:GO:0051494; P:GO:0060236; P:GO:1902845; F:GO:0005085; F:GO:0005543; F:GO:0051020; C:GO:0005938; C:GO:0032587; C:GO:0036449; C:GO:0099568	P:microtubule depolymerization; P:mitotic nuclear membrane disassembly; P:negative regulation of cell morphogenesis involved in differentiation; P:regulation of ARF protein signal transduction; P:negative regulation of mitotic sister chromatid segregation; P:negative regulation of neuron differentiation; P:negative regulation of mitotic nuclear division; P:regulation of mitotic centrosome separat…	NA	NA
jg28333	1	502.133	5.10964e-07	---NA---	408	NA	NA	NA	NA
jg28375	1	2391.96	9.14417e-120	beta-soluble NSF attachment protein	888	P:GO:0000281; P:GO:0001745; P:GO:0002090; P:GO:0006886; P:GO:0006891; P:GO:0007274; P:GO:0007420; P:GO:0010807; P:GO:0015833; P:GO:0016042; P:GO:0016192; P:GO:0017158; P:GO:0031629; P:GO:0032386; P:GO:0032781; P:GO:0034214; P:GO:0035249; P:GO:0035494; P:GO:0035556; P:GO:0045026; P:GO:0048488; P:GO:0048526; P:GO:0051260; P:GO:0051726; P:GO:0097480; P:GO:0098657; P:GO:0098693; P:GO:1902803; P:GO:20…	P:mitotic cytokinesis; P:compound eye morphogenesis; P:regulation of receptor internalization; P:intracellular protein transport; P:intra-Golgi vesicle-mediated transport; P:neuromuscular synaptic transmission; P:brain development; P:regulation of synaptic vesicle priming; P:peptide transport; P:lipid catabolic process; P:vesicle-mediated transport; P:regulation of calcium ion-dependent exocytosi…	EC:3.1.4; EC:3.1; EC:3; EC:3.1.4.3; EC:3.1.4.11; EC:3.1.1	Acting on ester bonds; Acting on ester bonds; Hydrolases; Phospholipase C; Phosphoinositide phospholipase C; Acting on ester bonds
jg28402	1	157.004	8.30286e-42	attractin-like protein 1 isoform X2	3837	P:GO:0007186; P:GO:0008039; C:GO:0016021	P:G protein-coupled receptor signaling pathway; P:synaptic target recognition; C:integral component of membrane	NA	NA
jg28478	1	849.3	4.2081e-23	cilia- and flagella-associated protein 36 isoform X1	1368	P:GO:0060271; F:GO:0047485; C:GO:0035869; C:GO:0097546	P:cilium assembly; F:protein N-terminus binding; C:ciliary transition zone; C:ciliary base	NA	NA
jg28481	1	2075.68	9.62235e-15	girdin isoform X6	5733	P:GO:0006275; P:GO:0010975; P:GO:0016477; P:GO:0030032; P:GO:0030705; P:GO:0031122; P:GO:0031929; P:GO:0032148; P:GO:0032956; P:GO:0042127; P:GO:0045664; P:GO:0045724; P:GO:0050767; P:GO:0051052; P:GO:0061024; P:GO:1903566; F:GO:0003779; F:GO:0008017; F:GO:0035091; F:GO:0042803; F:GO:0043168; F:GO:0043422; F:GO:0051959; C:GO:0005737; C:GO:0005783; C:GO:0005794; C:GO:0005813; C:GO:0005814; C:GO:00…	P:regulation of DNA replication; P:regulation of neuron projection development; P:cell migration; P:lamellipodium assembly; P:cytoskeleton-dependent intracellular transport; P:cytoplasmic microtubule organization; P:TOR signaling; P:activation of protein kinase B activity; P:regulation of actin cytoskeleton organization; P:regulation of cell population proliferation; P:regulation of neuron differ…	NA	NA
jg28483	1	296.125	2.11686e-07	---NA---	279	NA	NA	NA	NA
jg28484	1	692.464	1.76943e-15	calcium/calmodulin-dependent protein kinase type II subunit gamma isoform X1	1863	P:GO:0000082; P:GO:0000165; P:GO:0001666; P:GO:0006470; P:GO:0006979; P:GO:0007616; P:GO:0008049; P:GO:0008582; P:GO:0010628; P:GO:0014733; P:GO:0018105; P:GO:0018107; P:GO:0030073; P:GO:0030154; P:GO:0046777; P:GO:0048169; P:GO:0051259; P:GO:0051489; P:GO:0051924; P:GO:0051960; P:GO:0060278; P:GO:0060333; P:GO:0065009; P:GO:0072375; P:GO:0098662; P:GO:1901897; P:GO:1903076; F:GO:0004683; F:GO:00…	P:G1/S transition of mitotic cell cycle; P:MAPK cascade; P:response to hypoxia; P:protein dephosphorylation; P:response to oxidative stress; P:long-term memory; P:male courtship behavior; P:regulation of synaptic assembly at neuromuscular junction; P:positive regulation of gene expression; P:regulation of skeletal muscle adaptation; P:peptidyl-serine phosphorylation; P:peptidyl-threonine phosphor…	EC:2.7.1; EC:3.1.3.16; EC:3.1; EC:2.7; EC:2; EC:2.7.11.17; EC:3; EC:3.1.3	Transferring phosphorus-containing groups; Protein-serine/threonine phosphatase; Acting on ester bonds; Transferring phosphorus-containing groups; Transferases; Calcium/calmodulin-dependent protein kinase; Hydrolases; Acting on ester bonds
jg28519	1	842.778	2.5516e-06	mitogen-activated protein kinase kinase kinase kinase 3-like isoform X6	2769	P:GO:0007030; P:GO:0007346; P:GO:0009410; P:GO:0009411; P:GO:0009636; P:GO:0032147; P:GO:0034612; P:GO:0035332; P:GO:0040009; P:GO:0042059; P:GO:0043065; P:GO:0043406; P:GO:0045793; P:GO:0046330; P:GO:0046677; P:GO:0048149; P:GO:0070328; P:GO:1904263; F:GO:0005524; F:GO:0008349; F:GO:0017124; C:GO:0005829	P:Golgi organization; P:regulation of mitotic cell cycle; P:response to xenobiotic stimulus; P:response to UV; P:response to toxic substance; P:activation of protein kinase activity; P:response to tumor necrosis factor; P:positive regulation of hippo signaling; P:regulation of growth rate; P:negative regulation of epidermal growth factor receptor signaling pathway; P:positive regulation of apopto…	EC:2.7.1; EC:2.7.11.1; EC:2.7; EC:2	Transferring phosphorus-containing groups; Non-specific serine/threonine protein kinase; Transferring phosphorus-containing groups; Transferases
jg28527	1	151.114	1.71603e-51	CB1 cannabinoid receptor-interacting protein 1	489	P:GO:0009968; P:GO:2000272; F:GO:0008022; F:GO:0031718; C:GO:0005737; C:GO:0005886; C:GO:0043209	P:negative regulation of signal transduction; P:negative regulation of signaling receptor activity; F:protein C-terminus binding; F:type 1 cannabinoid receptor binding; C:cytoplasm; C:plasma membrane; C:myelin sheath	NA	NA
jg28528	1	1828.1	6.15699e-19	calcineurin subunit B type 1	513	P:GO:0001569; P:GO:0001837; P:GO:0006470; P:GO:0006606; P:GO:0007223; P:GO:0007507; P:GO:0010628; P:GO:0015833; P:GO:0022011; P:GO:0033173; P:GO:0038095; P:GO:0045944; P:GO:0050790; P:GO:0060487; P:GO:0099149; P:GO:0099170; F:GO:0004723; F:GO:0005509; F:GO:0005516; F:GO:0008597; F:GO:0016018; F:GO:0019902; F:GO:0019904; C:GO:0005654; C:GO:0005829; C:GO:0005955; C:GO:0042383; C:GO:0098685; C:GO:00…	P:branching involved in blood vessel morphogenesis; P:epithelial to mesenchymal transition; P:protein dephosphorylation; P:protein import into nucleus; P:Wnt signaling pathway, calcium modulating pathway; P:heart development; P:positive regulation of gene expression; P:peptide transport; P:myelination in peripheral nervous system; P:calcineurin-NFAT signaling cascade; P:Fc-epsilon receptor signal…	EC:3.1.3.16; EC:3.1; EC:3; EC:3.1.3	Protein-serine/threonine phosphatase; Acting on ester bonds; Hydrolases; Acting on ester bonds
jg28579	1	6431.65	4.49986e-08	spectrin beta chain, non-erythrocytic 1 isoform X2	7047	P:GO:0002119; P:GO:0007009; P:GO:0007026; P:GO:0007274; P:GO:0010172; P:GO:0016199; P:GO:0016358; P:GO:0040012; P:GO:0042062; P:GO:0046716; P:GO:0048790; P:GO:0051960; P:GO:0072499; F:GO:0003779; F:GO:0005546; F:GO:0008017; F:GO:0030506; C:GO:0008091; C:GO:0016327; C:GO:0016328; C:GO:0030424; C:GO:0031430; C:GO:0031594; C:GO:0031674; C:GO:0045169; C:GO:0045170; C:GO:0099568	P:nematode larval development; P:plasma membrane organization; P:negative regulation of microtubule depolymerization; P:neuromuscular synaptic transmission; P:embryonic body morphogenesis; P:axon midline choice point recognition; P:dendrite development; P:regulation of locomotion; P:long-term strengthening of neuromuscular junction; P:muscle cell cellular homeostasis; P:maintenance of presynaptic…	NA	NA
jg28603	1	720.848	3.2997e-33	fibroblast growth factor-binding protein 2	726	P:GO:0001934; P:GO:0030534; P:GO:0031646; P:GO:0043117; P:GO:0045743; P:GO:0070374; F:GO:0008201; F:GO:0017134; F:GO:0019838; F:GO:0043168; C:GO:0005576; C:GO:0005622	P:positive regulation of protein phosphorylation; P:adult behavior; P:positive regulation of nervous system process; P:positive regulation of vascular permeability; P:positive regulation of fibroblast growth factor receptor signaling pathway; P:positive regulation of ERK1 and ERK2 cascade; F:heparin binding; F:fibroblast growth factor binding; F:growth factor binding; F:anion binding; C:extracell…	NA	NA
jg28625	1	1298.91	7.90979e-91	pecanex-like protein 1 isoform X1	6351	C:GO:0016021	C:integral component of membrane	NA	NA
jg28636	1	180.036	2.23086e-50	glutamate receptor ionotropic, delta-1 isoform X1	2844	P:GO:0034220; P:GO:0035176; P:GO:0035235; P:GO:0051704; F:GO:0004970; C:GO:0016021; C:GO:0045211	P:ion transmembrane transport; P:social behavior; P:ionotropic glutamate receptor signaling pathway; P:multi-organism process; F:ionotropic glutamate receptor activity; C:integral component of membrane; C:postsynaptic membrane	EC:7	Translocases
jg28642	1	245.259	4.72344e-13	protein NDNF	1752	NA	NA	NA	NA
jg28654	1	585.441	1.75993e-58	regulator of G-protein signaling 7	1380	P:GO:0001975; P:GO:0006457; P:GO:0007186; P:GO:0007212; P:GO:0007420; P:GO:0007622; P:GO:0007631; P:GO:0008277; P:GO:0009409; P:GO:0009410; P:GO:0009636; P:GO:0009968; P:GO:0035556; P:GO:0040017; P:GO:0043547; P:GO:0045471; P:GO:0046662; P:GO:0046677; P:GO:0097366; P:GO:1901381; F:GO:0001965; F:GO:0005096; F:GO:0031681; C:GO:0005635; C:GO:0005829; C:GO:0005886; C:GO:0032991; C:GO:0044292; C:GO:00…	P:response to amphetamine; P:protein folding; P:G protein-coupled receptor signaling pathway; P:dopamine receptor signaling pathway; P:brain development; P:rhythmic behavior; P:feeding behavior; P:regulation of G protein-coupled receptor signaling pathway; P:response to cold; P:response to xenobiotic stimulus; P:response to toxic substance; P:negative regulation of signal transduction; P:intracel…	NA	NA
jg28658	1	6322.8	7.25527e-61	ankyrin-3-like isoform X8	14094	P:GO:0000281; P:GO:0006888; P:GO:0007009; P:GO:0007010; P:GO:0007528; P:GO:0010171; P:GO:0010628; P:GO:0010650; P:GO:0010960; P:GO:0019228; P:GO:0033563; P:GO:0034112; P:GO:0040018; P:GO:0043001; P:GO:0045760; P:GO:0045838; P:GO:0071286; P:GO:0071709; P:GO:0072660; P:GO:0090087; P:GO:0090314; P:GO:0098901; P:GO:0099612; P:GO:1900827; P:GO:1902260; P:GO:2000651; P:GO:2001259; F:GO:0005200; F:GO:00…	P:mitotic cytokinesis; P:endoplasmic reticulum to Golgi vesicle-mediated transport; P:plasma membrane organization; P:cytoskeleton organization; P:neuromuscular junction development; P:body morphogenesis; P:positive regulation of gene expression; P:positive regulation of cell communication by electrical coupling; P:magnesium ion homeostasis; P:neuronal action potential; P:dorsal/ventral axon guid…	NA	NA
jg28684	1	1257.36	1.81861e-26	C-terminal-binding protein 2a isoform X1	3087	P:GO:0000122; P:GO:0001700; P:GO:0006338; P:GO:0008285; P:GO:0010628; P:GO:0010629; P:GO:0016360; P:GO:0019079; P:GO:0022416; P:GO:0035220; P:GO:0035563; P:GO:0044403; P:GO:0045892; P:GO:0045944; P:GO:0048386; P:GO:0050872; P:GO:0051704; P:GO:0090090; P:GO:0090263; P:GO:1990830; F:GO:0003682; F:GO:0003713; F:GO:0003714; F:GO:0016616; F:GO:0016618; F:GO:0019901; F:GO:0030267; F:GO:0042803; F:GO:00…	P:negative regulation of transcription by RNA polymerase II; P:embryonic development via the syncytial blastoderm; P:chromatin remodeling; P:negative regulation of cell population proliferation; P:positive regulation of gene expression; P:negative regulation of gene expression; P:sensory organ precursor cell fate determination; P:viral genome replication; P:chaeta development; P:wing disc develop…	EC:1.1; EC:1; EC:1.1.1.79; EC:1.1.1; EC:1.1.1.81	Acting on the CH-OH group of donors; Oxidoreductases; Glyoxylate reductase (NADP(+)); Acting on the CH-OH group of donors; Hydroxypyruvate reductase
jg28697	1	524.739	1.34047e-80	receptor-type tyrosine-protein phosphatase epsilon-like isoform X1	2040	P:GO:0007185; P:GO:0033003; P:GO:0035335; P:GO:0046627; P:GO:0060027; F:GO:0004725; F:GO:0005001; F:GO:0042803; C:GO:0005634; C:GO:0005737; C:GO:0005886; C:GO:0016021	P:transmembrane receptor protein tyrosine phosphatase signaling pathway; P:regulation of mast cell activation; P:peptidyl-tyrosine dephosphorylation; P:negative regulation of insulin receptor signaling pathway; P:convergent extension involved in gastrulation; F:protein tyrosine phosphatase activity; F:transmembrane receptor protein tyrosine phosphatase activity; F:protein homodimerization activit…	EC:3.1; EC:3.1.3.48; EC:3; EC:3.1.3	Acting on ester bonds; Protein-tyrosine-phosphatase; Hydrolases; Acting on ester bonds
jg28705	1	1476.4	3.47333e-104	transcription factor COE3 isoform X1	1902	P:GO:0001700; P:GO:0006355; P:GO:0007367; P:GO:0007474; P:GO:0007526; P:GO:0009608; P:GO:0010628; P:GO:0010769; P:GO:0016204; P:GO:0035203; P:GO:0035289; P:GO:0035291; P:GO:0040024; P:GO:0042694; P:GO:0043065; P:GO:0045087; P:GO:0045664; P:GO:0045944; P:GO:0048580; P:GO:0048814; P:GO:0050767; P:GO:0051704; F:GO:0000978; F:GO:0001228; F:GO:0003677; F:GO:0003700; F:GO:0035035; F:GO:0042802; F:GO:00…	P:embryonic development via the syncytial blastoderm; P:regulation of transcription, DNA-templated; P:segment polarity determination; P:imaginal disc-derived wing vein specification; P:larval somatic muscle development; P:response to symbiont; P:positive regulation of gene expression; P:regulation of cell morphogenesis involved in differentiation; P:determination of muscle attachment site; P:regu…	NA	NA
jg28746	1	1504.28	3.38021e-60	neuroendocrine convertase 2	1926	P:GO:0002165; P:GO:0006508; P:GO:0006937; P:GO:0008340; P:GO:0009612; P:GO:0014057; P:GO:0016540; P:GO:0030070; P:GO:0030536; P:GO:0033500; P:GO:0034230; P:GO:0034231; P:GO:0035180; P:GO:0035187; P:GO:0045887; P:GO:0046887; P:GO:0060359; P:GO:0060456; P:GO:0061096; P:GO:0061837; P:GO:0090326; P:GO:0090474; P:GO:1900073; P:GO:1901046; P:GO:1903998; P:GO:1904014; P:GO:1904810; P:GO:1905850; P:GO:19…	P:instar larval or pupal development; P:proteolysis; P:regulation of muscle contraction; P:determination of adult lifespan; P:response to mechanical stimulus; P:positive regulation of acetylcholine secretion, neurotransmission; P:protein autoprocessing; P:insulin processing; P:larval feeding behavior; P:carbohydrate homeostasis; P:enkephalin processing; P:islet amyloid polypeptide processing; P:l…	EC:3.4.21; EC:3.4; EC:3; EC:3.4.21.94	Acting on peptide bonds (peptidases); Acting on peptide bonds (peptidases); Hydrolases; Proprotein convertase 2
jg28755	1	281.835	1.17016e-39	neurofilament light polypeptide	2319	P:GO:0032259; F:GO:0008171; C:GO:0005882	P:methylation; F:O-methyltransferase activity; C:intermediate filament	EC:2.1; EC:2; EC:2.1.1	Transferring one-carbon groups; Transferases; Transferring one-carbon groups
jg28762	1	975.801	2.47165e-69	calcium-activated potassium channel subunit alpha-1a isoform X1	2439	P:GO:0001666; P:GO:0006970; P:GO:0007605; P:GO:0007628; P:GO:0008582; P:GO:0009268; P:GO:0009410; P:GO:0009636; P:GO:0019228; P:GO:0030007; P:GO:0031960; P:GO:0032344; P:GO:0034465; P:GO:0042491; P:GO:0043525; P:GO:0043627; P:GO:0045433; P:GO:0045475; P:GO:0045794; P:GO:0046541; P:GO:0048469; P:GO:0050885; P:GO:0051289; P:GO:0051592; P:GO:0051960; P:GO:0060082; P:GO:0060083; P:GO:0060087; P:GO:00…	P:response to hypoxia; P:response to osmotic stress; P:sensory perception of sound; P:adult walking behavior; P:regulation of synaptic assembly at neuromuscular junction; P:response to pH; P:response to xenobiotic stimulus; P:response to toxic substance; P:neuronal action potential; P:cellular potassium ion homeostasis; P:response to corticosteroid; P:regulation of aldosterone metabolic process; …	EC:7	Translocases
jg28763	1	477.446	2.15897e-58	calcium-activated potassium channel subunit alpha-1 isoform X4	1914	P:GO:0001666; P:GO:0006970; P:GO:0007605; P:GO:0007628; P:GO:0008582; P:GO:0009268; P:GO:0009410; P:GO:0009636; P:GO:0019228; P:GO:0030007; P:GO:0031960; P:GO:0032344; P:GO:0034465; P:GO:0042491; P:GO:0043525; P:GO:0043627; P:GO:0045433; P:GO:0045475; P:GO:0045794; P:GO:0046541; P:GO:0048469; P:GO:0050885; P:GO:0051289; P:GO:0051592; P:GO:0051960; P:GO:0060082; P:GO:0060083; P:GO:0060087; P:GO:00…	P:response to hypoxia; P:response to osmotic stress; P:sensory perception of sound; P:adult walking behavior; P:regulation of synaptic assembly at neuromuscular junction; P:response to pH; P:response to xenobiotic stimulus; P:response to toxic substance; P:neuronal action potential; P:cellular potassium ion homeostasis; P:response to corticosteroid; P:regulation of aldosterone metabolic process; …	EC:7	Translocases
jg28769	1	1324.03	3.58525e-08	zinc finger MIZ domain-containing protein 1a isoform X1	2910	NA	NA	NA	NA
jg28779	1	1987.74	2.63411e-107	testican-2 isoform X1	1269	P:GO:0006858; P:GO:0007367; P:GO:0035592; P:GO:0048190; P:GO:0090090; P:GO:0090263; F:GO:0005509; F:GO:0017147; C:GO:0005576; C:GO:0005615	P:extracellular transport; P:segment polarity determination; P:establishment of protein localization to extracellular region; P:wing disc dorsal/ventral pattern formation; P:negative regulation of canonical Wnt signaling pathway; P:positive regulation of canonical Wnt signaling pathway; F:calcium ion binding; F:Wnt-protein binding; C:extracellular region; C:extracellular space	NA	NA
jg28805	1	428.707	1.30451e-08	leucine-rich glioma-inactivated protein 1-like	1638	P:GO:0007411; P:GO:0008283; P:GO:0030307; P:GO:0050806; P:GO:0051260; F:GO:0003824; F:GO:0005102; C:GO:0005576; C:GO:0005615; C:GO:0045202	P:axon guidance; P:cell population proliferation; P:positive regulation of cell growth; P:positive regulation of synaptic transmission; P:protein homooligomerization; F:catalytic activity; F:signaling receptor binding; C:extracellular region; C:extracellular space; C:synapse	NA	NA
jg28859	1	205.785	3.25563e-84	metal transporter CNNM1	2697	P:GO:0010960; C:GO:0016021	P:magnesium ion homeostasis; C:integral component of membrane	NA	NA
jg28900	1	963.923	2.63674e-39	mitogen-activated protein kinase 8 isoform X2	1251	P:GO:0000165; P:GO:0001503; P:GO:0001736; P:GO:0002052; P:GO:0002066; P:GO:0006355; P:GO:0006468; P:GO:0006954; P:GO:0006972; P:GO:0007258; P:GO:0007395; P:GO:0007411; P:GO:0007616; P:GO:0008340; P:GO:0009408; P:GO:0009411; P:GO:0010508; P:GO:0010628; P:GO:0010666; P:GO:0016241; P:GO:0016319; P:GO:0018105; P:GO:0018107; P:GO:0019731; P:GO:0030050; P:GO:0030858; P:GO:0031063; P:GO:0031116; P:GO:00…	P:MAPK cascade; P:ossification; P:establishment of planar polarity; P:positive regulation of neuroblast proliferation; P:columnar/cuboidal epithelial cell development; P:regulation of transcription, DNA-templated; P:protein phosphorylation; P:inflammatory response; P:hyperosmotic response; P:JUN phosphorylation; P:dorsal closure, spreading of leading edge cells; P:axon guidance; P:long-term memor…	EC:2.7.1; EC:2.7.12.1; EC:2.7.11.24; EC:2.7; EC:2	Transferring phosphorus-containing groups; Dual-specificity kinase; Mitogen-activated protein kinase; Transferring phosphorus-containing groups; Transferases
jg28982	1	1914.19	1.27234e-75	adhesion G protein-coupled receptor B3 isoform X1	4617	NA	NA	NA	NA
jg29004	1	125.473	8.36425e-54	neurexin-1a isoform X35	795	P:GO:0001525; P:GO:0007157; P:GO:0007158; P:GO:0007269; P:GO:0007411; P:GO:0010628; P:GO:0010629; P:GO:0010739; P:GO:0016339; P:GO:0021707; P:GO:0023041; P:GO:0030534; P:GO:0031646; P:GO:0033138; P:GO:0035176; P:GO:0042297; P:GO:0045184; P:GO:0045743; P:GO:0050885; P:GO:0051490; P:GO:0051704; P:GO:0051897; P:GO:0051965; P:GO:0051968; P:GO:0070374; P:GO:0071277; P:GO:0071625; P:GO:0090126; P:GO:00…	P:angiogenesis; P:heterophilic cell-cell adhesion via plasma membrane cell adhesion molecules; P:neuron cell-cell adhesion; P:neurotransmitter secretion; P:axon guidance; P:positive regulation of gene expression; P:negative regulation of gene expression; P:positive regulation of protein kinase A signaling; P:calcium-dependent cell-cell adhesion via plasma membrane cell adhesion molecules; P:cereb…	NA	NA
jg29006	1	330.145	5.49524e-64	neurexin-1a-beta isoform X33	1269	P:GO:0001525; P:GO:0007157; P:GO:0007158; P:GO:0007269; P:GO:0007411; P:GO:0010628; P:GO:0010629; P:GO:0010739; P:GO:0016339; P:GO:0021707; P:GO:0023041; P:GO:0030534; P:GO:0031646; P:GO:0033138; P:GO:0035176; P:GO:0042297; P:GO:0045184; P:GO:0045743; P:GO:0050885; P:GO:0051490; P:GO:0051704; P:GO:0051897; P:GO:0051965; P:GO:0051968; P:GO:0070374; P:GO:0071277; P:GO:0071625; P:GO:0090126; P:GO:00…	P:angiogenesis; P:heterophilic cell-cell adhesion via plasma membrane cell adhesion molecules; P:neuron cell-cell adhesion; P:neurotransmitter secretion; P:axon guidance; P:positive regulation of gene expression; P:negative regulation of gene expression; P:positive regulation of protein kinase A signaling; P:calcium-dependent cell-cell adhesion via plasma membrane cell adhesion molecules; P:cereb…	NA	NA
jg29047	1	3529.5	2.36707e-24	microtubule-associated protein futsch isoform X3	3360	P:GO:0021987; P:GO:0022008; P:GO:0022027; P:GO:0030953; P:GO:0032886; F:GO:0016922; F:GO:0019904; F:GO:0051427; C:GO:0005654; C:GO:0005829; C:GO:0005886; C:GO:0015630	P:cerebral cortex development; P:neurogenesis; P:interkinetic nuclear migration; P:astral microtubule organization; P:regulation of microtubule-based process; F:nuclear receptor binding; F:protein domain specific binding; F:hormone receptor binding; C:nucleoplasm; C:cytosol; C:plasma membrane; C:microtubule cytoskeleton	NA	NA
jg29080	1	564.33	2.91179e-132	BTB/POZ domain-containing protein 3	1554	P:GO:0021987; P:GO:0030162; P:GO:0043161; P:GO:0048813; F:GO:0031625; C:GO:0005634; C:GO:0005737; C:GO:0005829; C:GO:0019005	P:cerebral cortex development; P:regulation of proteolysis; P:proteasome-mediated ubiquitin-dependent protein catabolic process; P:dendrite morphogenesis; F:ubiquitin protein ligase binding; C:nucleus; C:cytoplasm; C:cytosol; C:SCF ubiquitin ligase complex	NA	NA
jg29108	1	1970.17	5.0213e-12	AT-rich interactive domain-containing protein 4B isoform X1	3906	P:GO:0006349; P:GO:0007283; P:GO:0010628; P:GO:0016575; P:GO:0034773; P:GO:0036124; P:GO:0045944; P:GO:0097368; P:GO:1901215; F:GO:0000976; F:GO:0000981; F:GO:0004407; C:GO:0017053; C:GO:0070822	P:regulation of gene expression by genetic imprinting; P:spermatogenesis; P:positive regulation of gene expression; P:histone deacetylation; P:histone H4-K20 trimethylation; P:histone H3-K9 trimethylation; P:positive regulation of transcription by RNA polymerase II; P:establishment of Sertoli cell barrier; P:negative regulation of neuron death; F:transcription cis-regulatory region binding; F:DNA…	EC:3.5.1; EC:3.5.1.98; EC:3.5; EC:3	Acting on carbon-nitrogen bonds, other than peptide bonds; Histone deacetylase; Acting on carbon-nitrogen bonds, other than peptide bonds; Hydrolases
jg29145	1	1069.6	2.71224e-92	actin-binding LIM protein 1a isoform X1	2346	P:GO:0007010; P:GO:0007601; P:GO:0009887; P:GO:0010591; P:GO:0010628; P:GO:0045944; P:GO:0051489; P:GO:0060271; P:GO:0072499; F:GO:0003779; F:GO:0046872; F:GO:0051015; C:GO:0001725; C:GO:0005737; C:GO:0014069; C:GO:0016323; C:GO:0030027	P:cytoskeleton organization; P:visual perception; P:animal organ morphogenesis; P:regulation of lamellipodium assembly; P:positive regulation of gene expression; P:positive regulation of transcription by RNA polymerase II; P:regulation of filopodium assembly; P:cilium assembly; P:photoreceptor cell axon guidance; F:actin binding; F:metal ion binding; F:actin filament binding; C:stress fiber; C:cy…	NA	NA
jg29176	1	2156.98	5.0849e-10	probable E3 ubiquitin-protein ligase HERC4 isoform X1	3051	P:GO:0000209; P:GO:0006511; P:GO:0007283; P:GO:0016567; P:GO:0034126; P:GO:0035331; P:GO:0045089; P:GO:0051865; P:GO:1903078; F:GO:0004842; F:GO:0061630; C:GO:0001650; C:GO:0005829	P:protein polyubiquitination; P:ubiquitin-dependent protein catabolic process; P:spermatogenesis; P:protein ubiquitination; P:positive regulation of MyD88-dependent toll-like receptor signaling pathway; P:negative regulation of hippo signaling; P:positive regulation of innate immune response; P:protein autoubiquitination; P:positive regulation of protein localization to plasma membrane; F:ubiquit…	EC:2; EC:2.3.2.26	Transferases; HECT-type E3 ubiquitin transferase
jg29203	1	847.657	6.67156e-40	proto-oncogene tyrosine-protein kinase receptor Ret isoform X1	3330	P:GO:0001657; P:GO:0001755; P:GO:0001838; P:GO:0001954; P:GO:0006919; P:GO:0007015; P:GO:0007156; P:GO:0007158; P:GO:0007411; P:GO:0007497; P:GO:0009410; P:GO:0010628; P:GO:0010769; P:GO:0010976; P:GO:0014042; P:GO:0016358; P:GO:0018108; P:GO:0030335; P:GO:0032147; P:GO:0033141; P:GO:0033619; P:GO:0033630; P:GO:0035799; P:GO:0035860; P:GO:0043406; P:GO:0045666; P:GO:0045793; P:GO:0045893; P:GO:00…	P:ureteric bud development; P:neural crest cell migration; P:embryonic epithelial tube formation; P:positive regulation of cell-matrix adhesion; P:activation of cysteine-type endopeptidase activity involved in apoptotic process; P:actin filament organization; P:homophilic cell adhesion via plasma membrane adhesion molecules; P:neuron cell-cell adhesion; P:axon guidance; P:posterior midgut develop…	EC:2.7.10.1; EC:2.7.1; EC:2.7; EC:2	Receptor protein-tyrosine kinase; Transferring phosphorus-containing groups; Transferring phosphorus-containing groups; Transferases
jg29300	1	250.833	2.00749e-53	stromal membrane-associated protein 1 isoform X1	1254	P:GO:0043547; P:GO:0045648; P:GO:1903708; P:GO:2000369; F:GO:0005096; F:GO:0030276; C:GO:0005737	P:positive regulation of GTPase activity; P:positive regulation of erythrocyte differentiation; P:positive regulation of hemopoiesis; P:regulation of clathrin-dependent endocytosis; F:GTPase activator activity; F:clathrin binding; C:cytoplasm	NA	NA
jg29301	1	381.378	6.3517e-102	galactosylgalactosylxylosylprotein 3-beta-glucuronosyltransferase 2	918	P:GO:0006486; P:GO:0016051; P:GO:0030204; P:GO:0043436; P:GO:0050650; F:GO:0015018; F:GO:0046872; C:GO:0000139; C:GO:0016021; C:GO:0098791	P:protein glycosylation; P:carbohydrate biosynthetic process; P:chondroitin sulfate metabolic process; P:oxoacid metabolic process; P:chondroitin sulfate proteoglycan biosynthetic process; F:galactosylgalactosylxylosylprotein 3-beta-glucuronosyltransferase activity; F:metal ion binding; C:Golgi membrane; C:integral component of membrane; C:Golgi apparatus subcompartment	EC:2.4; EC:2; EC:2.4.1.17; EC:2.4.1.135; EC:2.4.1	Glycosyltransferases; Transferases; Glucuronosyltransferase; Galactosylgalactosylxylosylprotein 3-beta-glucuronosyltransferase; Glycosyltransferases
jg29308	1	684.735	5.30947e-22	regulating synaptic membrane exocytosis protein 1-like isoform X1	2802	P:GO:0010628; P:GO:0010808; P:GO:0010976; P:GO:0031632; P:GO:0032388; P:GO:0045666; P:GO:0045956; P:GO:0048169; P:GO:0048791; P:GO:0050769; P:GO:0050790; P:GO:0060291; P:GO:0061669; P:GO:0097151; P:GO:0097480; P:GO:0098693; P:GO:1902805; P:GO:1903861; P:GO:2000302; P:GO:2000463; F:GO:0017124; F:GO:0019901; F:GO:0030695; F:GO:0031267; F:GO:0044325; C:GO:0005829; C:GO:0014069; C:GO:0031982; C:GO:00…	P:positive regulation of gene expression; P:positive regulation of synaptic vesicle priming; P:positive regulation of neuron projection development; P:positive regulation of synaptic vesicle fusion to presynaptic active zone membrane; P:positive regulation of intracellular transport; P:positive regulation of neuron differentiation; P:positive regulation of calcium ion-dependent exocytosis; P:regu…	NA	NA
jg29310	1	1352.69	8.70676e-173	BAF chromatin remodeling complex subunit BCL11A a isoform X1	2202	P:GO:0000122; P:GO:0007165; P:GO:0010628; P:GO:0010629; P:GO:0010770; P:GO:0010771; P:GO:0010976; P:GO:0016925; P:GO:0030183; P:GO:0030217; P:GO:0030517; P:GO:0032463; P:GO:0045665; P:GO:0045666; P:GO:0045944; P:GO:0048671; P:GO:0048672; P:GO:0090278; P:GO:1903860; P:GO:1904800; P:GO:2000171; P:GO:2000173; F:GO:0000978; F:GO:0001227; F:GO:0003714; F:GO:0019901; F:GO:0042803; F:GO:0046982; C:GO:00…	P:negative regulation of transcription by RNA polymerase II; P:signal transduction; P:positive regulation of gene expression; P:negative regulation of gene expression; P:positive regulation of cell morphogenesis involved in differentiation; P:negative regulation of cell morphogenesis involved in differentiation; P:positive regulation of neuron projection development; P:protein sumoylation; P:B ce…	NA	NA
jg29324	1	350.27	1.22791e-83	sodium/potassium/calcium exchanger 3	1944	P:GO:0006816; P:GO:0006874; P:GO:0035725; P:GO:0070588; P:GO:0071805; P:GO:0098656; F:GO:0005262; F:GO:0005509; F:GO:0008273; F:GO:0030955; F:GO:0031402; C:GO:0005886; C:GO:0005887; C:GO:0016021	P:calcium ion transport; P:cellular calcium ion homeostasis; P:sodium ion transmembrane transport; P:calcium ion transmembrane transport; P:potassium ion transmembrane transport; P:anion transmembrane transport; F:calcium channel activity; F:calcium ion binding; F:calcium, potassium:sodium antiporter activity; F:potassium ion binding; F:sodium ion binding; C:plasma membrane; C:integral component …	EC:7	Translocases
jg29331	1	256.881	2.32393e-19	zinc finger protein ZIC 4-like	1155	F:GO:0003677; F:GO:0046872; C:GO:0005634	F:DNA binding; F:metal ion binding; C:nucleus	NA	NA
jg29366	1	622.899	5.89809e-06	5'-nucleotidase, cytosolic IIa isoform X1	1797	P:GO:0006195; P:GO:0006805; P:GO:0016310; P:GO:0016311; P:GO:0034404; P:GO:0046040; P:GO:0046085; F:GO:0008253; F:GO:0042802; F:GO:0050146; C:GO:0005829	P:purine nucleotide catabolic process; P:xenobiotic metabolic process; P:phosphorylation; P:dephosphorylation; P:nucleobase-containing small molecule biosynthetic process; P:IMP metabolic process; P:adenosine metabolic process; F:5'-nucleotidase activity; F:identical protein binding; F:nucleoside phosphotransferase activity; C:cytosol	EC:2.7.1; EC:3.1; EC:2.7; EC:2; EC:3; EC:3.1.3.5; EC:2.7.1.77; EC:3.1.3	Transferring phosphorus-containing groups; Acting on ester bonds; Transferring phosphorus-containing groups; Transferases; Hydrolases; 5'-nucleotidase; Nucleoside phosphotransferase; Acting on ester bonds
jg29378	1	441.89	1.91471e-16	heterogeneous nuclear ribonucleoprotein L-like	1668	P:GO:0006397; P:GO:0007411; P:GO:0008340; P:GO:0008343; P:GO:0033120; F:GO:0003723; F:GO:0003729; C:GO:0005634	P:mRNA processing; P:axon guidance; P:determination of adult lifespan; P:adult feeding behavior; P:positive regulation of RNA splicing; F:RNA binding; F:mRNA binding; C:nucleus	NA	NA
jg29417	1	436.835	5.12723e-48	heat shock 70 kDa protein 12A isoform X1	1998	NA	NA	NA	NA
jg29424	1	1386.78	5.56878e-39	core histone macro-H2A.2	1104	P:GO:0000122; P:GO:0007420; P:GO:0007549; P:GO:0031507; P:GO:0045618; P:GO:0071169; P:GO:1901837; F:GO:0000977; F:GO:0031490; C:GO:0000785; C:GO:0001740; C:GO:0005654	P:negative regulation of transcription by RNA polymerase II; P:brain development; P:dosage compensation; P:heterochromatin assembly; P:positive regulation of keratinocyte differentiation; P:establishment of protein localization to chromatin; P:negative regulation of transcription of nucleolar large rRNA by RNA polymerase I; F:RNA polymerase II transcription regulatory region sequence-specific DNA…	NA	NA
jg20690	1	1031.67	4.27726e-09	protein AF1q	261	P:GO:0010628; P:GO:0045893; P:GO:0051901; P:GO:0090200; P:GO:0097190; P:GO:0097191; P:GO:0097193; P:GO:2001235; C:GO:0005634; C:GO:0005654; C:GO:0005737; C:GO:0005815; C:GO:0005829	P:positive regulation of gene expression; P:positive regulation of transcription, DNA-templated; P:positive regulation of mitochondrial depolarization; P:positive regulation of release of cytochrome c from mitochondria; P:apoptotic signaling pathway; P:extrinsic apoptotic signaling pathway; P:intrinsic apoptotic signaling pathway; P:positive regulation of apoptotic signaling pathway; C:nucleus; C…	EC:2.1.1.43	Transferring one-carbon groups
jg20692	1	2054.51	8.38932e-38	acidic leucine-rich nuclear phosphoprotein 32 family member E isoform X1	732	P:GO:0006334; P:GO:0006913; P:GO:0042981; P:GO:0043086; P:GO:0043486; F:GO:0019212; F:GO:0042393; C:GO:0000812; C:GO:0031410	P:nucleosome assembly; P:nucleocytoplasmic transport; P:regulation of apoptotic process; P:negative regulation of catalytic activity; P:histone exchange; F:phosphatase inhibitor activity; F:histone binding; C:Swr1 complex; C:cytoplasmic vesicle	NA	NA
jg20847	1	224.744	3.79583e-161	glutamate receptor ionotropic, NMDA 2D	5793	P:GO:0000165; P:GO:0001964; P:GO:0006468; P:GO:0007420; P:GO:0007616; P:GO:0008344; P:GO:0019722; P:GO:0034220; P:GO:0035235; P:GO:0035249; P:GO:0048167; P:GO:0050975; P:GO:0051930; P:GO:0065009; P:GO:0072375; P:GO:0097553; P:GO:0098976; F:GO:0004970; F:GO:0004972; F:GO:0005085; F:GO:0016595; F:GO:0022839; F:GO:0022849; F:GO:0031267; F:GO:0042165; C:GO:0016021; C:GO:0017146; C:GO:0045211	P:MAPK cascade; P:startle response; P:protein phosphorylation; P:brain development; P:long-term memory; P:adult locomotory behavior; P:calcium-mediated signaling; P:ion transmembrane transport; P:ionotropic glutamate receptor signaling pathway; P:synaptic transmission, glutamatergic; P:regulation of synaptic plasticity; P:sensory perception of touch; P:regulation of sensory perception of pain; P:…	EC:7	Translocases
jg20853	1	394.307	2.4767e-33	protein shisa-7 isoform X1	2019	P:GO:0007613; P:GO:0048172; P:GO:0099175; P:GO:1900273; P:GO:1901626; P:GO:1904717; F:GO:0035255; C:GO:0014069; C:GO:0016021; C:GO:0032281; C:GO:0098985	P:memory; P:regulation of short-term neuronal synaptic plasticity; P:regulation of postsynapse organization; P:positive regulation of long-term synaptic potentiation; P:regulation of postsynaptic membrane organization; P:regulation of AMPA glutamate receptor clustering; F:ionotropic glutamate receptor binding; C:postsynaptic density; C:integral component of membrane; C:AMPA glutamate receptor com…	NA	NA
jg20860	1	777.165	3.66448e-59	epsin-1-like isoform X1	2853	NA	NA	NA	NA
jg20890	1	579.527	3.06103e-53	flotillin-1a	1275	P:GO:0001934; P:GO:0002090; P:GO:0007411; P:GO:0010831; P:GO:0022603; P:GO:0022617; P:GO:0032092; P:GO:0032226; P:GO:0032728; P:GO:0033227; P:GO:0034116; P:GO:0034141; P:GO:0034976; P:GO:0035023; P:GO:0044854; P:GO:0045089; P:GO:0045807; P:GO:0048643; P:GO:0050821; P:GO:0051260; P:GO:0060355; P:GO:0070528; P:GO:0071360; P:GO:0072659; P:GO:0098657; P:GO:1901741; P:GO:1901890; P:GO:1903044; P:GO:20…	P:positive regulation of protein phosphorylation; P:regulation of receptor internalization; P:axon guidance; P:positive regulation of myotube differentiation; P:regulation of anatomical structure morphogenesis; P:extracellular matrix disassembly; P:positive regulation of protein binding; P:positive regulation of synaptic transmission, dopaminergic; P:positive regulation of interferon-beta product…	NA	NA
jg20892	1	261.718	6.19094e-27	uncharacterized protein LOC117263565	1665	C:GO:0016021	C:integral component of membrane	NA	NA
jg20900	1	5575.02	4.84738e-207	sodium/potassium-transporting ATPase subunit alpha-3a	3069	P:GO:0000003; P:GO:0001508; P:GO:0001700; P:GO:0001894; P:GO:0006883; P:GO:0006937; P:GO:0007268; P:GO:0007605; P:GO:0007613; P:GO:0007630; P:GO:0008340; P:GO:0008360; P:GO:0008542; P:GO:0009266; P:GO:0009410; P:GO:0009612; P:GO:0010248; P:GO:0019991; P:GO:0021987; P:GO:0030007; P:GO:0035158; P:GO:0035235; P:GO:0036376; P:GO:0050905; P:GO:0051124; P:GO:0051128; P:GO:0060048; P:GO:0060075; P:GO:00…	P:reproduction; P:action potential; P:embryonic development via the syncytial blastoderm; P:tissue homeostasis; P:cellular sodium ion homeostasis; P:regulation of muscle contraction; P:chemical synaptic transmission; P:sensory perception of sound; P:memory; P:jump response; P:determination of adult lifespan; P:regulation of cell shape; P:visual learning; P:response to temperature stimulus; P:resp…	EC:7.2.2.13; EC:3.6.1; EC:3.6; EC:3; EC:3.6.3.9; EC:7; EC:7.2.2.3; EC:7.2.2.6	Na(+)/K(+)-exchanging ATPase; Acting on acid anhydrides; Acting on acid anhydrides; Hydrolases; Acting on acid anhydrides; Translocases; P-type Na(+) transporter; P-type K(+) transporter
jg20928	1	261.317	3.26561e-06	LOW QUALITY PROTEIN: uncharacterized protein LOC120786776	2505	F:GO:0008270	F:zinc ion binding	NA	NA
jg20978	1	463.329	1.79111e-13	zinc finger and BTB domain-containing protein 22	2013	NA	NA	NA	NA
jg20979	1	785.205	1.24884e-52	sodium channel, voltage-gated, type I, beta b	666	P:GO:0007155; P:GO:0010765; P:GO:0010976; P:GO:0019227; P:GO:0021966; P:GO:0034765; P:GO:0035725; P:GO:0045666; P:GO:0046684; P:GO:0050769; P:GO:0060307; P:GO:0060371; P:GO:0086002; P:GO:0086047; P:GO:0086091; P:GO:2000649; F:GO:0005244; F:GO:0005248; F:GO:0017080; F:GO:0019871; F:GO:0086062; C:GO:0001518; C:GO:0014704; C:GO:0030315; C:GO:0033268; C:GO:0043025; C:GO:0043209	P:cell adhesion; P:positive regulation of sodium ion transport; P:positive regulation of neuron projection development; P:neuronal action potential propagation; P:corticospinal neuron axon guidance; P:regulation of ion transmembrane transport; P:sodium ion transmembrane transport; P:positive regulation of neuron differentiation; P:response to pyrethroid; P:positive regulation of neurogenesis; P:r…	EC:7	Translocases
jg21022	1	470.031	2.69058e-49	transcription factor AP-2-epsilon isoform X2	1344	P:GO:0000122; P:GO:0002121; P:GO:0006355; P:GO:0007485; P:GO:0008049; P:GO:0008343; P:GO:0008344; P:GO:0010628; P:GO:0010629; P:GO:0016348; P:GO:0030318; P:GO:0042127; P:GO:0045944; P:GO:0048728; F:GO:0000978; F:GO:0001228; F:GO:0003677; F:GO:0003700; F:GO:0042803; F:GO:0046982; C:GO:0005634	P:negative regulation of transcription by RNA polymerase II; P:inter-male aggressive behavior; P:regulation of transcription, DNA-templated; P:imaginal disc-derived male genitalia development; P:male courtship behavior; P:adult feeding behavior; P:adult locomotory behavior; P:positive regulation of gene expression; P:negative regulation of gene expression; P:imaginal disc-derived leg joint morpho…	NA	NA
jg21026	1	1500.9	2.32169e-94	UPF0500 protein C1orf216 homolog isoform X1	1197	NA	NA	NA	NA
jg21035	1	308.253	2.27928e-53	ephrin type-A receptor 7-like	2370	P:GO:0006468; P:GO:0018108; P:GO:0048013; F:GO:0005003; F:GO:0005005; F:GO:0005524; C:GO:0005887	P:protein phosphorylation; P:peptidyl-tyrosine phosphorylation; P:ephrin receptor signaling pathway; F:ephrin receptor activity; F:transmembrane-ephrin receptor activity; F:ATP binding; C:integral component of plasma membrane	EC:2.7.10.1; EC:2.7.1; EC:2.7; EC:2	Receptor protein-tyrosine kinase; Transferring phosphorus-containing groups; Transferring phosphorus-containing groups; Transferases
jg21061	1	794.16	1.92636e-56	double-strand-break repair protein rad21 homolog A-like	1953	P:GO:0006302; P:GO:0007062; P:GO:0007064; P:GO:0007130; P:GO:0007131; P:GO:0010628; P:GO:0010972; P:GO:0016322; P:GO:0045841; P:GO:0045876; P:GO:0045944; P:GO:0051984; P:GO:0071168; F:GO:0001228; F:GO:0003682; F:GO:0003684; F:GO:0044877; C:GO:0000795; C:GO:0000798; C:GO:0005634; C:GO:0005654; C:GO:0005705; C:GO:0005721; C:GO:0005829; C:GO:0008278; C:GO:0016363	P:double-strand break repair; P:sister chromatid cohesion; P:mitotic sister chromatid cohesion; P:synaptonemal complex assembly; P:reciprocal meiotic recombination; P:positive regulation of gene expression; P:negative regulation of G2/M transition of mitotic cell cycle; P:neuron remodeling; P:negative regulation of mitotic metaphase/anaphase transition; P:positive regulation of sister chromatid c…	NA	NA
jg21069	1	469.425	2.48862e-81	proline-rich transmembrane protein 1	726	C:GO:0016021	C:integral component of membrane	NA	NA
jg21132	1	2486.63	1.45251e-17	dual specificity protein kinase CLK2 isoform X1	1950	P:GO:0001101; P:GO:0002683; P:GO:0002790; P:GO:0006468; P:GO:0007350; P:GO:0007548; P:GO:0009306; P:GO:0010212; P:GO:0018108; P:GO:0030717; P:GO:0032526; P:GO:0034125; P:GO:0042051; P:GO:0043484; P:GO:0045088; P:GO:0045721; P:GO:0046777; P:GO:2000255; F:GO:0004672; F:GO:0004674; F:GO:0004713; F:GO:0005524; F:GO:0042802; F:GO:0046872; C:GO:0005634; C:GO:0005783; C:GO:0016607	P:response to acid chemical; P:negative regulation of immune system process; P:peptide secretion; P:protein phosphorylation; P:blastoderm segmentation; P:sex differentiation; P:protein secretion; P:response to ionizing radiation; P:peptidyl-tyrosine phosphorylation; P:oocyte karyosome formation; P:response to retinoic acid; P:negative regulation of MyD88-dependent toll-like receptor signaling pat…	EC:2.7.1; EC:2.7.12.1; EC:2.7; EC:2	Transferring phosphorus-containing groups; Dual-specificity kinase; Transferring phosphorus-containing groups; Transferases
jg21135	1	774.117	3.02356e-54	CUGBP Elav-like family member 3 isoform X2	1224	P:GO:0000381; P:GO:0007283; P:GO:0017148; P:GO:0030317; P:GO:0030575; P:GO:0032224; P:GO:0032230; P:GO:0034660; P:GO:0045664; P:GO:0048026; P:GO:0050767; P:GO:0098781; F:GO:0003727; F:GO:0003729; F:GO:0036002; F:GO:0042803; F:GO:0097322; C:GO:0005737; C:GO:0016607; C:GO:0032991	P:regulation of alternative mRNA splicing, via spliceosome; P:spermatogenesis; P:negative regulation of translation; P:flagellated sperm motility; P:nuclear body organization; P:positive regulation of synaptic transmission, cholinergic; P:positive regulation of synaptic transmission, GABAergic; P:ncRNA metabolic process; P:regulation of neuron differentiation; P:positive regulation of mRNA splici…	NA	NA
jg21136	1	289.063	6.82156e-12	---NA---	267	NA	NA	NA	NA
jg21153	1	650.501	3.77476e-76	tripartite motif-containing 46b isoform X1	2382	P:GO:0001578; P:GO:0001764; P:GO:0010771; P:GO:0030517; P:GO:0032880; P:GO:0045665; P:GO:0048490; P:GO:0097480; P:GO:0099003; P:GO:0099612; P:GO:1901953; F:GO:0008017; F:GO:0008270; C:GO:0015630; C:GO:0043194; C:GO:1990769	P:microtubule bundle formation; P:neuron migration; P:negative regulation of cell morphogenesis involved in differentiation; P:negative regulation of axon extension; P:regulation of protein localization; P:negative regulation of neuron differentiation; P:anterograde synaptic vesicle transport; P:establishment of synaptic vesicle localization; P:vesicle-mediated transport in synapse; P:protein loc…	NA	NA
jg21158	1	153.1	4.18078e-62	ephrin-A3	708	P:GO:0007267; P:GO:0007411; P:GO:0016525; P:GO:0018108; P:GO:0045664; P:GO:0048013; P:GO:0050767; P:GO:1902961; F:GO:0005005; F:GO:0046875; C:GO:0031225; C:GO:0031226	P:cell-cell signaling; P:axon guidance; P:negative regulation of angiogenesis; P:peptidyl-tyrosine phosphorylation; P:regulation of neuron differentiation; P:ephrin receptor signaling pathway; P:regulation of neurogenesis; P:positive regulation of aspartic-type endopeptidase activity involved in amyloid precursor protein catabolic process; F:transmembrane-ephrin receptor activity; F:ephrin recept…	EC:2.7.1; EC:2.7.10.1; EC:2.7; EC:2	Transferring phosphorus-containing groups; Receptor protein-tyrosine kinase; Transferring phosphorus-containing groups; Transferases
jg21232	1	496.518	1.32727e-81	CUB and sushi domain-containing protein 3	9999	P:GO:0045664; P:GO:0050767; P:GO:0050773; C:GO:0005886	P:regulation of neuron differentiation; P:regulation of neurogenesis; P:regulation of dendrite development; C:plasma membrane	NA	NA
jg21235	1	486.492	4.74609e-99	teashirt homolog 1	3387	P:GO:0000122; P:GO:0009952; P:GO:0010468; P:GO:0010629; P:GO:0042474; P:GO:0060023; F:GO:0001227; F:GO:0003677; F:GO:0003682; F:GO:0046872; C:GO:0005634	P:negative regulation of transcription by RNA polymerase II; P:anterior/posterior pattern specification; P:regulation of gene expression; P:negative regulation of gene expression; P:middle ear morphogenesis; P:soft palate development; F:DNA-binding transcription repressor activity, RNA polymerase II-specific; F:DNA binding; F:chromatin binding; F:metal ion binding; C:nucleus	NA	NA
jg21245	1	1061.4	4.69134e-126	synaptic vesicle glycoprotein 2A-like	2214	P:GO:0006836; P:GO:0006874; P:GO:0007268; P:GO:0014052; P:GO:0051588; P:GO:0055085; F:GO:0019901; F:GO:0022857; C:GO:0005783; C:GO:0005886; C:GO:0005911; C:GO:0016021; C:GO:0030285; C:GO:0030425; C:GO:0030672; C:GO:0031594; C:GO:0043025; C:GO:0043195; C:GO:0048786	P:neurotransmitter transport; P:cellular calcium ion homeostasis; P:chemical synaptic transmission; P:regulation of gamma-aminobutyric acid secretion; P:regulation of neurotransmitter transport; P:transmembrane transport; F:protein kinase binding; F:transmembrane transporter activity; C:endoplasmic reticulum; C:plasma membrane; C:cell-cell junction; C:integral component of membrane; C:integral co…	EC:7	Translocases
jg21277	1	325.263	1.8076e-60	dystrobrevin binding protein 1b isoform X2	678	C:GO:0005737; C:GO:0016021	C:cytoplasm; C:integral component of membrane	NA	NA
jg21294	1	1994.8	1.60268e-29	stathmin-2b isoform X2	723	P:GO:0007026; P:GO:0010976; P:GO:0010977; P:GO:0031110; P:GO:0031115; P:GO:0031117; P:GO:0045665; P:GO:0045666; P:GO:0050768; P:GO:0050769; P:GO:1990090; F:GO:0015631; F:GO:0048306; C:GO:0005794; C:GO:0030027; C:GO:0030426; C:GO:0031982; C:GO:0043025; C:GO:0048471	P:negative regulation of microtubule depolymerization; P:positive regulation of neuron projection development; P:negative regulation of neuron projection development; P:regulation of microtubule polymerization or depolymerization; P:negative regulation of microtubule polymerization; P:positive regulation of microtubule depolymerization; P:negative regulation of neuron differentiation; P:positive …	NA	NA
jg21304	1	459.32	1.09184e-34	type 2 phosphatidylinositol 4,5-bisphosphate 4-phosphatase isoform X1	825	P:GO:0046856; F:GO:0034597; C:GO:0005765; C:GO:0016021; C:GO:0031902	P:phosphatidylinositol dephosphorylation; F:phosphatidylinositol-4,5-bisphosphate 4-phosphatase activity; C:lysosomal membrane; C:integral component of membrane; C:late endosome membrane	EC:3.1; EC:3.1.3.78; EC:3; EC:3.1.3.66; EC:3.1.3	Acting on ester bonds; Phosphatidylinositol-4,5-bisphosphate 4-phosphatase; Hydrolases; Phosphatidylinositol-3,4-bisphosphate 4-phosphatase; Acting on ester bonds
jg21320	1	1812.9	3.9721e-60	glutamate receptor, ionotropic, N-methyl D-aspartate-associated protein 1a (glutamate binding)	1044	P:GO:0032469; P:GO:0098655; P:GO:1902108; P:GO:1902236; F:GO:0005261; F:GO:0044325; C:GO:0005739; C:GO:0005783; C:GO:0005794; C:GO:0016021	P:endoplasmic reticulum calcium ion homeostasis; P:cation transmembrane transport; P:regulation of mitochondrial membrane permeability involved in apoptotic process; P:negative regulation of endoplasmic reticulum stress-induced intrinsic apoptotic signaling pathway; F:cation channel activity; F:transmembrane transporter binding; C:mitochondrion; C:endoplasmic reticulum; C:Golgi apparatus; C:integ…	EC:7	Translocases
jg21325	1	944.91	2.68038e-09	ankyrin repeat and IBR domain-containing protein 1-like isoform X1	3858	P:GO:0000209; P:GO:0016567; P:GO:0032436; F:GO:0004842; F:GO:0031624; F:GO:0046872; F:GO:0061630; C:GO:0000151; C:GO:0005737	P:protein polyubiquitination; P:protein ubiquitination; P:positive regulation of proteasomal ubiquitin-dependent protein catabolic process; F:ubiquitin-protein transferase activity; F:ubiquitin conjugating enzyme binding; F:metal ion binding; F:ubiquitin protein ligase activity; C:ubiquitin ligase complex; C:cytoplasm	EC:2.3.2.31; EC:2	RBR-type E3 ubiquitin transferase; Transferases
jg21330	1	1619.3	1.72919e-44	V-type proton ATPase subunit C 1-B	1149	P:GO:0008286; P:GO:0009790; P:GO:0015833; P:GO:0015988; P:GO:0016241; P:GO:0030728; P:GO:0033572; P:GO:1902600; F:GO:0008553; F:GO:0015078; F:GO:0016887; F:GO:0046961; C:GO:0000221; C:GO:0005765; C:GO:0005829; C:GO:0031410; C:GO:0033180; C:GO:0033181; C:GO:0045177	P:insulin receptor signaling pathway; P:embryo development; P:peptide transport; P:energy coupled proton transmembrane transport, against electrochemical gradient; P:regulation of macroautophagy; P:ovulation; P:transferrin transport; P:proton transmembrane transport; F:P-type proton-exporting transporter activity; F:proton transmembrane transporter activity; F:ATP hydrolysis activity; F:proton-tr…	EC:7.1.3.1; EC:3.6.1; EC:7.1.2.1; EC:3.6; EC:3; EC:7	H(+)-exporting diphosphatase; Acting on acid anhydrides; P-type H(+)-exporting transporter; Acting on acid anhydrides; Hydrolases; Translocases
jg21347	1	551.668	6.57588e-67	protein CBFA2T1 isoform X4	1815	P:GO:0006091; P:GO:0010629; P:GO:0010977; P:GO:0045599; P:GO:0045665; P:GO:0045892; P:GO:0050768; P:GO:0051101; F:GO:0003700; F:GO:0003714; F:GO:0042803; F:GO:0046872; C:GO:0005634; C:GO:0005654; C:GO:0016363; C:GO:0017053	P:generation of precursor metabolites and energy; P:negative regulation of gene expression; P:negative regulation of neuron projection development; P:negative regulation of fat cell differentiation; P:negative regulation of neuron differentiation; P:negative regulation of transcription, DNA-templated; P:negative regulation of neurogenesis; P:regulation of DNA binding; F:DNA-binding transcription …	NA	NA
jg21392	1	495.667	4.23539e-39	AT-hook DNA-binding motif-containing protein 1	4422	F:GO:0003677	F:DNA binding	NA	NA
jg21404	1	2069.76	1.40395e-18	engulfment and cell motility protein 1 isoform X1	1776	P:GO:0000132; P:GO:0002066; P:GO:0007015; P:GO:0007298; P:GO:0007417; P:GO:0007520; P:GO:0016203; P:GO:0016601; P:GO:0031532; P:GO:0035262; P:GO:0038096; P:GO:0044403; P:GO:0048010; P:GO:0050690; P:GO:0060097; P:GO:0070986; P:GO:0090630; P:GO:0098657; P:GO:1901076; P:GO:1902742; P:GO:1903356; F:GO:0005547; F:GO:0017124; F:GO:0031267; F:GO:0044877; F:GO:0070064; F:GO:0070273; F:GO:0080025; C:GO:00…	P:establishment of mitotic spindle orientation; P:columnar/cuboidal epithelial cell development; P:actin filament organization; P:border follicle cell migration; P:central nervous system development; P:myoblast fusion; P:muscle attachment; P:Rac protein signal transduction; P:actin cytoskeleton reorganization; P:gonad morphogenesis; P:Fc-gamma receptor signaling pathway involved in phagocytosis; …	NA	NA
jg21410	1	369.071	7.11192e-64	gamma-aminobutyric acid type B receptor subunit 2	2814	P:GO:0007186; P:GO:0007187; P:GO:0007193; P:GO:0007194; P:GO:0007214; P:GO:0009410; P:GO:0031631; P:GO:0032223; P:GO:0032387; P:GO:0042048; P:GO:0045955; P:GO:0046676; P:GO:0071260; P:GO:0098693; P:GO:1902804; F:GO:0004965; F:GO:0046982; F:GO:0099528; C:GO:0005737; C:GO:0005886; C:GO:0016021; C:GO:0038039; C:GO:0043005; C:GO:0098878; C:GO:1902712	P:G protein-coupled receptor signaling pathway; P:G protein-coupled receptor signaling pathway, coupled to cyclic nucleotide second messenger; P:adenylate cyclase-inhibiting G protein-coupled receptor signaling pathway; P:negative regulation of adenylate cyclase activity; P:gamma-aminobutyric acid signaling pathway; P:response to xenobiotic stimulus; P:negative regulation of synaptic vesicle fusi…	NA	NA
jg21426	1	339.807	2.18811e-30	copine-4	1662	F:GO:0005544	F:calcium-dependent phospholipid binding	NA	NA
jg21429	1	1623.19	1.5138e-101	chondroitin sulfate proteoglycan 5b isoform X2	2013	P:GO:0007399; C:GO:0016021	P:nervous system development; C:integral component of membrane	NA	NA
jg21437	1	747.574	3.87311e-24	rap guanine nucleotide exchange factor 5	2685	P:GO:0007264; P:GO:0007399; P:GO:0050790; F:GO:0005085; F:GO:0030742; F:GO:0031267; C:GO:0016604	P:small GTPase mediated signal transduction; P:nervous system development; P:regulation of catalytic activity; F:guanyl-nucleotide exchange factor activity; F:GTP-dependent protein binding; F:small GTPase binding; C:nuclear body	NA	NA
jg21440	1	734.578	3.44649e-23	tax1-binding protein 1 homolog A isoform X1	2883	NA	NA	NA	NA
jg21469	1	343.623	1.02269e-47	acetylcholinesterase collagenic tail peptide	1383	P:GO:0001507; P:GO:0008582; P:GO:0042178; P:GO:0042447; P:GO:0051960; P:GO:0071340; P:GO:0090150; P:GO:0097164; F:GO:0005198; F:GO:0008201; F:GO:0043168; C:GO:0005604; C:GO:0005615; C:GO:0005886; C:GO:0031594	P:acetylcholine catabolic process in synaptic cleft; P:regulation of synaptic assembly at neuromuscular junction; P:xenobiotic catabolic process; P:hormone catabolic process; P:regulation of nervous system development; P:skeletal muscle acetylcholine-gated channel clustering; P:establishment of protein localization to membrane; P:ammonium ion metabolic process; F:structural molecule activity; F:h…	NA	NA
jg21474	1	159.385	2.38199e-66	raftlin	2307	P:GO:0001765; P:GO:0002457; P:GO:0002758; P:GO:0015833; P:GO:0032596; P:GO:0032620; P:GO:0033227; P:GO:0034138; P:GO:0040010; P:GO:0043330; P:GO:0050852; P:GO:0050853; F:GO:0003725; C:GO:0005768; C:GO:0005886; C:GO:0032991; C:GO:0045121	P:membrane raft assembly; P:T cell antigen processing and presentation; P:innate immune response-activating signal transduction; P:peptide transport; P:protein transport into membrane raft; P:interleukin-17 production; P:dsRNA transport; P:toll-like receptor 3 signaling pathway; P:positive regulation of growth rate; P:response to exogenous dsRNA; P:T cell receptor signaling pathway; P:B cell rece…	NA	NA
jg21482	1	176.558	1.73963e-101	DNA-binding protein SATB1a	2784	P:GO:0006338; F:GO:0003677; C:GO:0005634	P:chromatin remodeling; F:DNA binding; C:nucleus	NA	NA
jg21492	1	1540.86	1.86158e-44	MAGUK p55 subfamily member 6b isoform X2	1737	P:GO:0016310; P:GO:0019991; P:GO:0035001; P:GO:0035159; P:GO:0046037; P:GO:0046710; P:GO:0046940; P:GO:0065003; P:GO:1901068; F:GO:0004385; F:GO:0030165; C:GO:0005918; C:GO:0016021; C:GO:0016328	P:phosphorylation; P:septate junction assembly; P:dorsal trunk growth, open tracheal system; P:regulation of tube length, open tracheal system; P:GMP metabolic process; P:GDP metabolic process; P:nucleoside monophosphate phosphorylation; P:protein-containing complex assembly; P:guanosine-containing compound metabolic process; F:guanylate kinase activity; F:PDZ domain binding; C:septate junction; …	EC:2.7.4.4; EC:2.7.4.8; EC:2.7; EC:2; EC:2.7.4	Nucleoside-phosphate kinase; Guanylate kinase; Transferring phosphorus-containing groups; Transferases; Transferring phosphorus-containing groups
jg21502	1	604.692	8.94553e-09	cytoplasmic dynein 1 intermediate chain 1 isoform X1	1944	P:GO:0001754; P:GO:0006888; P:GO:0007051; P:GO:0007291; P:GO:0007420; P:GO:0008088; P:GO:0019886; P:GO:0032781; P:GO:0034501; P:GO:0047496; P:GO:0051642; F:GO:0003777; F:GO:0008017; F:GO:0017111; F:GO:0030507; F:GO:0034452; F:GO:0045503; F:GO:0045504; C:GO:0000776; C:GO:0000922; C:GO:0005634; C:GO:0005829; C:GO:0005868; C:GO:0036126; C:GO:0036464; C:GO:0048471; C:GO:0055037; C:GO:1904115; C:GO:19…	P:eye photoreceptor cell differentiation; P:endoplasmic reticulum to Golgi vesicle-mediated transport; P:spindle organization; P:sperm individualization; P:brain development; P:axo-dendritic transport; P:antigen processing and presentation of exogenous peptide antigen via MHC class II; P:positive regulation of ATPase activity; P:protein localization to kinetochore; P:vesicle transport along micro…	EC:3.6.1; EC:3.6; EC:3	Acting on acid anhydrides; Acting on acid anhydrides; Hydrolases
jg21506	1	1424.35	1.04964e-13	epsilon-sarcoglycan isoform X3	1257	P:GO:0001822; P:GO:0003012; P:GO:0007160; P:GO:0007420; P:GO:0007519; P:GO:0061024; F:GO:0005509; F:GO:0008307; C:GO:0005794; C:GO:0005856; C:GO:0005887; C:GO:0016012; C:GO:0016021; C:GO:0030425; C:GO:0032590; C:GO:0042383	P:kidney development; P:muscle system process; P:cell-matrix adhesion; P:brain development; P:skeletal muscle tissue development; P:membrane organization; F:calcium ion binding; F:structural constituent of muscle; C:Golgi apparatus; C:cytoskeleton; C:integral component of plasma membrane; C:sarcoglycan complex; C:integral component of membrane; C:dendrite; C:dendrite membrane; C:sarcolemma	NA	NA
jg21536	1	464.072	8.37292e-14	Integrin beta-8	1992	P:GO:0001568; P:GO:0007160; P:GO:0007229; P:GO:0010628; P:GO:0010629; P:GO:0016477; P:GO:0030198; P:GO:0033627; P:GO:0045766; P:GO:0051216; P:GO:0060674; F:GO:0005178; F:GO:0038023; F:GO:1990430; C:GO:0005925; C:GO:0008305; C:GO:0009986; C:GO:0034686	P:blood vessel development; P:cell-matrix adhesion; P:integrin-mediated signaling pathway; P:positive regulation of gene expression; P:negative regulation of gene expression; P:cell migration; P:extracellular matrix organization; P:cell adhesion mediated by integrin; P:positive regulation of angiogenesis; P:cartilage development; P:placenta blood vessel development; F:integrin binding; F:signalin…	NA	NA
jg21556	1	556.359	4.53727e-70	adhesion G protein-coupled receptor B2 isoform X2	5001	P:GO:0007186; P:GO:0007422; P:GO:0033173; P:GO:0051965; F:GO:0004930; C:GO:0005813; C:GO:0005886; C:GO:0016021	P:G protein-coupled receptor signaling pathway; P:peripheral nervous system development; P:calcineurin-NFAT signaling cascade; P:positive regulation of synapse assembly; F:G protein-coupled receptor activity; C:centrosome; C:plasma membrane; C:integral component of membrane	NA	NA
jg21611	1	654.244	5.43684e-51	thrombospondin type-1 domain-containing protein 7A	5355	P:GO:0031532; C:GO:0005886; C:GO:0098846	P:actin cytoskeleton reorganization; C:plasma membrane; C:podocyte foot	NA	NA
jg21628	1	163.448	1.19181e-43	uncharacterized protein KIAA0895 isoform X1	1521	NA	NA	NA	NA
jg21656	1	6565.38	6.69961e-46	stathmin 1a	441	P:GO:0000281; P:GO:0002066; P:GO:0007019; P:GO:0007052; P:GO:0007298; P:GO:0007409; P:GO:0007420; P:GO:0008088; P:GO:0008354; P:GO:0009615; P:GO:0031110; P:GO:0031115; P:GO:0032091; P:GO:0035024; P:GO:0048012; P:GO:0051124; P:GO:0051272; P:GO:0051497; P:GO:0061436; P:GO:0070495; P:GO:1905098; F:GO:0008017; C:GO:0005829; C:GO:0005875; C:GO:0016020; C:GO:0031594; C:GO:0043005	P:mitotic cytokinesis; P:columnar/cuboidal epithelial cell development; P:microtubule depolymerization; P:mitotic spindle organization; P:border follicle cell migration; P:axonogenesis; P:brain development; P:axo-dendritic transport; P:germ cell migration; P:response to virus; P:regulation of microtubule polymerization or depolymerization; P:negative regulation of microtubule polymerization; P:ne…	NA	NA
jg21658	1	1119.49	1.30111e-77	receptor-type tyrosine-protein phosphatase U-like isoform X1	4365	P:GO:0007185; P:GO:0008285; P:GO:0030336; P:GO:0034109; P:GO:0034394; P:GO:0035335; P:GO:0060070; F:GO:0005001; F:GO:0008013; F:GO:0042802; C:GO:0005887; C:GO:0005911	P:transmembrane receptor protein tyrosine phosphatase signaling pathway; P:negative regulation of cell population proliferation; P:negative regulation of cell migration; P:homotypic cell-cell adhesion; P:protein localization to cell surface; P:peptidyl-tyrosine dephosphorylation; P:canonical Wnt signaling pathway; F:transmembrane receptor protein tyrosine phosphatase activity; F:beta-catenin bind…	EC:3.1; EC:3.1.3.48; EC:3; EC:3.1.3	Acting on ester bonds; Protein-tyrosine-phosphatase; Hydrolases; Acting on ester bonds
jg21660	1	366.978	2.69613e-42	ras-related protein Rab-42a	657	P:GO:0006914; P:GO:0032482; F:GO:0003924; F:GO:0005525; C:GO:0005886	P:autophagy; P:Rab protein signal transduction; F:GTPase activity; F:GTP binding; C:plasma membrane	EC:3.6.1; EC:3.6; EC:3	Acting on acid anhydrides; Acting on acid anhydrides; Hydrolases
jg21681	1	224.085	3.12796e-38	glycoprotein endo-alpha-1,2-mannosidase-like protein	804	F:GO:0016798; C:GO:0000139; C:GO:0016021	F:hydrolase activity, acting on glycosyl bonds; C:Golgi membrane; C:integral component of membrane	EC:3.2; EC:3; EC:3.2.1.130	Glycosylases; Hydrolases; Glycoprotein endo-alpha-1,2-mannosidase
jg21705	1	272.724	3.61949e-55	protein FAM135B	4194	P:GO:0044255; F:GO:0052689	P:cellular lipid metabolic process; F:carboxylic ester hydrolase activity	EC:3.1; EC:3; EC:3.1.1.1	Acting on ester bonds; Hydrolases; Carboxylesterase
jg21706	1	402.679	7.27346e-74	KH domain-containing, RNA-binding, signal transduction-associated protein 3	1023	P:GO:0000381; P:GO:0006915; P:GO:0007288; P:GO:0007291; P:GO:0010608; P:GO:0019233; P:GO:0033120; P:GO:0051259; F:GO:0003723; F:GO:0003727; F:GO:0019904; F:GO:0042802; C:GO:0005634; C:GO:0016607	P:regulation of alternative mRNA splicing, via spliceosome; P:apoptotic process; P:sperm axoneme assembly; P:sperm individualization; P:posttranscriptional regulation of gene expression; P:sensory perception of pain; P:positive regulation of RNA splicing; P:protein complex oligomerization; F:RNA binding; F:single-stranded RNA binding; F:protein domain specific binding; F:identical protein binding…	NA	NA
jg21724	1	177.108	6.32018e-26	---NA---	243	NA	NA	NA	NA
jg21725	1	524.787	6.08759e-46	hippocalcin-like protein 1	582	P:GO:0007420; P:GO:0007584; P:GO:0009410; P:GO:0009636; P:GO:0019722; P:GO:0031283; P:GO:0031584; P:GO:0045762; P:GO:0048839; P:GO:0060041; P:GO:0071257; P:GO:0071277; P:GO:0072347; P:GO:0090087; P:GO:0090314; P:GO:1901385; P:GO:1901986; P:GO:1902065; P:GO:1904009; P:GO:1904010; F:GO:0003779; F:GO:0005509; F:GO:0019900; F:GO:0042802; C:GO:0005829; C:GO:0019898; C:GO:0030424; C:GO:0032590; C:GO:00…	P:brain development; P:response to nutrient; P:response to xenobiotic stimulus; P:response to toxic substance; P:calcium-mediated signaling; P:negative regulation of guanylate cyclase activity; P:activation of phospholipase D activity; P:positive regulation of adenylate cyclase activity; P:inner ear development; P:retina development in camera-type eye; P:cellular response to electrical stimulus; …	NA	NA
jg21729	1	799.138	1.07882e-59	KH domain-containing, RNA-binding, signal transduction-associated protein 1b	1089	P:GO:0000086; P:GO:0007166; P:GO:0007283; P:GO:0008283; P:GO:0009967; P:GO:0010629; P:GO:0045786; P:GO:0045892; P:GO:0045948; P:GO:0046833; P:GO:0048024; P:GO:0051259; F:GO:0003677; F:GO:0003730; F:GO:0008143; F:GO:0008266; F:GO:0017124; F:GO:0035591; F:GO:0042802; F:GO:0044877; C:GO:0005634; C:GO:0005654; C:GO:0005829; C:GO:0070618	P:G2/M transition of mitotic cell cycle; P:cell surface receptor signaling pathway; P:spermatogenesis; P:cell population proliferation; P:positive regulation of signal transduction; P:negative regulation of gene expression; P:negative regulation of cell cycle; P:negative regulation of transcription, DNA-templated; P:positive regulation of translational initiation; P:positive regulation of RNA exp…	NA	NA
jg21739	1	5350.82	8.0755e-81	MARCKS-related protein 1-B	624	P:GO:0003407; P:GO:0007417; P:GO:0008284; P:GO:0051216; F:GO:0005516; C:GO:0005737; C:GO:0005886; C:GO:0016020	P:neural retina development; P:central nervous system development; P:positive regulation of cell population proliferation; P:cartilage development; F:calmodulin binding; C:cytoplasm; C:plasma membrane; C:membrane	NA	NA
jg21747	1	4011.3	5.54469e-15	triple functional domain protein isoform X1	9342	P:GO:0001764; P:GO:0006468; P:GO:0007185; P:GO:0007186; P:GO:0008045; P:GO:0008078; P:GO:0009792; P:GO:0010770; P:GO:0010976; P:GO:0014057; P:GO:0018991; P:GO:0030838; P:GO:0032228; P:GO:0035022; P:GO:0035025; P:GO:0040012; P:GO:0040028; P:GO:0043065; P:GO:0043652; P:GO:0045599; P:GO:0045666; P:GO:0045773; P:GO:0046887; P:GO:0048808; P:GO:0060341; P:GO:0061062; P:GO:0065009; P:GO:0098657; P:GO:19…	P:neuron migration; P:protein phosphorylation; P:transmembrane receptor protein tyrosine phosphatase signaling pathway; P:G protein-coupled receptor signaling pathway; P:motor neuron axon guidance; P:mesodermal cell migration; P:embryo development ending in birth or egg hatching; P:positive regulation of cell morphogenesis involved in differentiation; P:positive regulation of neuron projection de…	EC:2.7.1; EC:2.7.11.1; EC:2.7; EC:2	Transferring phosphorus-containing groups; Non-specific serine/threonine protein kinase; Transferring phosphorus-containing groups; Transferases
jg21755	1	924.681	1.28816e-81	ubiquitin-conjugating enzyme E2Q-like protein 1	837	P:GO:0016567; F:GO:0061631; C:GO:0005634; C:GO:0005886	P:protein ubiquitination; F:ubiquitin conjugating enzyme activity; C:nucleus; C:plasma membrane	EC:2; EC:2.3.2.23	Transferases; E2 ubiquitin-conjugating enzyme
jg21775	1	545.576	1.04142e-37	macoilin-1	2037	P:GO:0023041; C:GO:0016021; C:GO:0030867; C:GO:0031965	P:neuronal signal transduction; C:integral component of membrane; C:rough endoplasmic reticulum membrane; C:nuclear membrane	NA	NA
jg21785	1	334.024	2.78894e-12	cholecystokinin	552	P:GO:0001662; P:GO:0001764; P:GO:0001836; P:GO:0006919; P:GO:0007165; P:GO:0007205; P:GO:0007409; P:GO:0007586; P:GO:0008284; P:GO:0010469; P:GO:0014049; P:GO:0032099; P:GO:0032461; P:GO:0042755; P:GO:0043065; P:GO:0050731; P:GO:0051901; P:GO:0051930; F:GO:0005179; F:GO:0005184; C:GO:0005576; C:GO:0005615; C:GO:0016020; C:GO:0030425; C:GO:0043194; C:GO:0043195; C:GO:0043203; C:GO:0043204	P:behavioral fear response; P:neuron migration; P:release of cytochrome c from mitochondria; P:activation of cysteine-type endopeptidase activity involved in apoptotic process; P:signal transduction; P:protein kinase C-activating G protein-coupled receptor signaling pathway; P:axonogenesis; P:digestion; P:positive regulation of cell population proliferation; P:regulation of signaling receptor act…	NA	NA
jg21786	1	943.35	2.14572e-64	trafficking kinesin-binding protein 1-like isoform X2	3366	P:GO:0006357; P:GO:0006493; P:GO:0006605; P:GO:0007287; P:GO:0007310; P:GO:0008333; P:GO:0010770; P:GO:0010976; P:GO:0015833; P:GO:0030382; P:GO:0045666; P:GO:0048311; P:GO:0048813; P:GO:0050772; P:GO:0098957; F:GO:0003777; F:GO:0017022; F:GO:0017111; F:GO:0030911; F:GO:0050811; C:GO:0005634; C:GO:0005739; C:GO:0005769; C:GO:0030425; C:GO:0044295; C:GO:0048471	P:regulation of transcription by RNA polymerase II; P:protein O-linked glycosylation; P:protein targeting; P:Nebenkern assembly; P:oocyte dorsal/ventral axis specification; P:endosome to lysosome transport; P:positive regulation of cell morphogenesis involved in differentiation; P:positive regulation of neuron projection development; P:peptide transport; P:sperm mitochondrion organization; P:posi…	EC:3.6.1; EC:3.6; EC:3	Acting on acid anhydrides; Acting on acid anhydrides; Hydrolases
jg21791	1	740.754	7.84277e-49	maturin	390	P:GO:0048666; C:GO:0005737	P:neuron development; C:cytoplasm	NA	NA
jg21796	1	1509.31	1.8263e-11	protein FAM49A-like isoform X2	1248	P:GO:0030833; F:GO:0031267; C:GO:0016020	P:regulation of actin filament polymerization; F:small GTPase binding; C:membrane	NA	NA
jg21827	1	3070.65	1.65007e-73	regulating synaptic membrane exocytosis protein 2-like isoform X1	5055	P:GO:0006886; P:GO:0006887; P:GO:0065007; F:GO:0031267; F:GO:0046872; C:GO:0016020; C:GO:0045202	P:intracellular protein transport; P:exocytosis; P:biological regulation; F:small GTPase binding; F:metal ion binding; C:membrane; C:synapse	NA	NA
jg23402	1	5023.4	4.25267e-92	kinase D-interacting substrate of 220 kDa B isoform X1	5244	P:GO:0010976; P:GO:0032147; P:GO:0038180; P:GO:0043406; P:GO:0045666; P:GO:0050769; F:GO:0019887; F:GO:0019901; F:GO:0030165; C:GO:0005770; C:GO:0005829; C:GO:0032991	P:positive regulation of neuron projection development; P:activation of protein kinase activity; P:nerve growth factor signaling pathway; P:positive regulation of MAP kinase activity; P:positive regulation of neuron differentiation; P:positive regulation of neurogenesis; F:protein kinase regulator activity; F:protein kinase binding; F:PDZ domain binding; C:late endosome; C:cytosol; C:protein-cont…	NA	NA
jg23437	1	722.823	4.17065e-46	centrosomal protein of 170 kDa protein B isoform X1	5166	NA	NA	NA	NA
jg23440	1	9517.89	7.10758e-26	creatine kinase B-type	1269	P:GO:0016310; P:GO:0046314; F:GO:0004111; F:GO:0005524	P:phosphorylation; P:phosphocreatine biosynthetic process; F:creatine kinase activity; F:ATP binding	EC:2.7.3.2; EC:2.7; EC:2.7.3; EC:2	Creatine kinase; Transferring phosphorus-containing groups; Transferring phosphorus-containing groups; Transferases
jg23478	1	1214.54	7.11685e-12	band 4.1-like protein 2 isoform X8	2823	P:GO:0008360; P:GO:0031032; P:GO:0051128; P:GO:1904778; F:GO:0003779; F:GO:0005200; F:GO:0030507; F:GO:0042731; C:GO:0005654; C:GO:0005829; C:GO:0005886; C:GO:0008091; C:GO:0030054; C:GO:0099738	P:regulation of cell shape; P:actomyosin structure organization; P:regulation of cellular component organization; P:positive regulation of protein localization to cell cortex; F:actin binding; F:structural constituent of cytoskeleton; F:spectrin binding; F:PH domain binding; C:nucleoplasm; C:cytosol; C:plasma membrane; C:spectrin; C:cell junction; C:cell cortex region	NA	NA
jg23479	1	1034.34	0.00036102	band 4.1-like protein 2 isoform X1	1473	P:GO:0008360; P:GO:0031032; P:GO:0051128; P:GO:1904778; F:GO:0003779; F:GO:0005200; F:GO:0030507; F:GO:0042731; C:GO:0005654; C:GO:0005829; C:GO:0005886; C:GO:0008091; C:GO:0030054; C:GO:0099738	P:regulation of cell shape; P:actomyosin structure organization; P:regulation of cellular component organization; P:positive regulation of protein localization to cell cortex; F:actin binding; F:structural constituent of cytoskeleton; F:spectrin binding; F:PH domain binding; C:nucleoplasm; C:cytosol; C:plasma membrane; C:spectrin; C:cell junction; C:cell cortex region	NA	NA
jg23549	1	329.07	9.0825e-53	leucine-rich repeat and fibronectin type-III domain-containing protein 5	2154	P:GO:0007409; P:GO:0042981; P:GO:0048085; C:GO:0005615; C:GO:0016021	P:axonogenesis; P:regulation of apoptotic process; P:adult chitin-containing cuticle pigmentation; C:extracellular space; C:integral component of membrane	NA	NA
jg23551	1	612.1	3.21323e-113	enah/Vasp-like b isoform X1	1104	P:GO:0008154; P:GO:0045010; P:GO:0051289; F:GO:0003779; F:GO:0017124; C:GO:0005737; C:GO:0005856; C:GO:0030027	P:actin polymerization or depolymerization; P:actin nucleation; P:protein homotetramerization; F:actin binding; F:SH3 domain binding; C:cytoplasm; C:cytoskeleton; C:lamellipodium	NA	NA
jg23566	1	747.014	5.57442e-147	lysosome-associated membrane glycoprotein 5	825	C:GO:0016021; C:GO:0031901; C:GO:0032584; C:GO:0032590; C:GO:0033116; C:GO:0055038	C:integral component of membrane; C:early endosome membrane; C:growth cone membrane; C:dendrite membrane; C:endoplasmic reticulum-Golgi intermediate compartment membrane; C:recycling endosome membrane	NA	NA
jg23569	1	219.336	2.5157e-17	hypothetical protein SMAX5B_008291	462	P:GO:0007420; P:GO:0016042; P:GO:0035556; P:GO:0051726; F:GO:0004435; F:GO:0005509; C:GO:0005634; C:GO:0005737	P:brain development; P:lipid catabolic process; P:intracellular signal transduction; P:regulation of cell cycle; F:phosphatidylinositol phospholipase C activity; F:calcium ion binding; C:nucleus; C:cytoplasm	EC:3.1.4.3; EC:3.1.4.11; EC:3.1.1	Phospholipase C; Phosphoinositide phospholipase C; Acting on ester bonds
jg23578	1	2051.78	7.39091e-49	secretogranin-1	1416	P:GO:0006887; P:GO:0010469; P:GO:0043687; F:GO:0005179; C:GO:0005576; C:GO:0005788; C:GO:0030141; C:GO:0030658	P:exocytosis; P:regulation of signaling receptor activity; P:post-translational protein modification; F:hormone activity; C:extracellular region; C:endoplasmic reticulum lumen; C:secretory granule; C:transport vesicle membrane	NA	NA
jg23580	1	934.055	2.79104e-40	N-ethylmaleimide-sensitive factor attachment protein, beta b	891	P:GO:0000281; P:GO:0001745; P:GO:0002090; P:GO:0006886; P:GO:0006891; P:GO:0007274; P:GO:0010807; P:GO:0015833; P:GO:0017158; P:GO:0031629; P:GO:0032386; P:GO:0032781; P:GO:0034214; P:GO:0035249; P:GO:0035494; P:GO:0045026; P:GO:0045494; P:GO:0048488; P:GO:0048526; P:GO:0051260; P:GO:0097480; P:GO:0098657; P:GO:0098693; P:GO:1902803; P:GO:2000300; F:GO:0001671; F:GO:0005483; F:GO:0008047; F:GO:00…	P:mitotic cytokinesis; P:compound eye morphogenesis; P:regulation of receptor internalization; P:intracellular protein transport; P:intra-Golgi vesicle-mediated transport; P:neuromuscular synaptic transmission; P:regulation of synaptic vesicle priming; P:peptide transport; P:regulation of calcium ion-dependent exocytosis; P:synaptic vesicle fusion to presynaptic active zone membrane; P:regulation…	NA	NA
jg23590	1	536.708	9.7418e-20	kelch-like protein 29	2628	C:GO:0005622; C:GO:0031463	C:intracellular anatomical structure; C:Cul3-RING ubiquitin ligase complex	NA	NA
jg23601	1	601.197	5.06376e-70	neurexin 3b isoform X3	3294	P:GO:0001525; P:GO:0007158; P:GO:0007165; P:GO:0007269; P:GO:0007411; P:GO:0007416; P:GO:0007612; P:GO:0030534; P:GO:0035176; P:GO:0051704; P:GO:0065009; P:GO:0071625; F:GO:0004888; F:GO:0005246; F:GO:0050839; F:GO:0097109; C:GO:0005576; C:GO:0005887; C:GO:0032991; C:GO:0042734	P:angiogenesis; P:neuron cell-cell adhesion; P:signal transduction; P:neurotransmitter secretion; P:axon guidance; P:synapse assembly; P:learning; P:adult behavior; P:social behavior; P:multi-organism process; P:regulation of molecular function; P:vocalization behavior; F:transmembrane signaling receptor activity; F:calcium channel regulator activity; F:cell adhesion molecule binding; F:neuroligi…	NA	NA
jg23605	1	777.457	1.26839e-107	neurexin 3b isoform X5	1890	P:GO:0001525; P:GO:0007158; P:GO:0007165; P:GO:0007269; P:GO:0007411; P:GO:0007416; P:GO:0007612; P:GO:0030534; P:GO:0035176; P:GO:0051704; P:GO:0065009; P:GO:0071625; F:GO:0004888; F:GO:0005246; F:GO:0050839; F:GO:0097109; C:GO:0005576; C:GO:0005887; C:GO:0016021; C:GO:0032991; C:GO:0042734	P:angiogenesis; P:neuron cell-cell adhesion; P:signal transduction; P:neurotransmitter secretion; P:axon guidance; P:synapse assembly; P:learning; P:adult behavior; P:social behavior; P:multi-organism process; P:regulation of molecular function; P:vocalization behavior; F:transmembrane signaling receptor activity; F:calcium channel regulator activity; F:cell adhesion molecule binding; F:neuroligi…	NA	NA
jg23622	1	319.288	4.8299e-42	protein FAM177A1-like isoform X1	663	NA	NA	NA	NA
jg23698	1	1031.34	1.49476e-39	protein SOGA3-like	2670	P:GO:0010506; C:GO:0005615; C:GO:0016021	P:regulation of autophagy; C:extracellular space; C:integral component of membrane	NA	NA
jg23713	1	546.025	9.66989e-92	clathrin coat assembly protein AP180 isoform X4	387	P:GO:0006511; P:GO:0007163; P:GO:0007269; P:GO:0007270; P:GO:0009791; P:GO:0010770; P:GO:0010940; P:GO:0010976; P:GO:0016185; P:GO:0042331; P:GO:0045666; P:GO:0046907; P:GO:0048268; P:GO:0050772; P:GO:0051223; P:GO:0051899; P:GO:0090087; P:GO:0097480; P:GO:0098657; P:GO:0098693; P:GO:1900244; P:GO:1900275; P:GO:1902683; P:GO:1903539; P:GO:1904006; P:GO:1905445; P:GO:2000331; P:GO:2000370; P:GO:20…	P:ubiquitin-dependent protein catabolic process; P:establishment or maintenance of cell polarity; P:neurotransmitter secretion; P:neuron-neuron synaptic transmission; P:post-embryonic development; P:positive regulation of cell morphogenesis involved in differentiation; P:positive regulation of necrotic cell death; P:positive regulation of neuron projection development; P:synaptic vesicle budding …	NA	NA
jg23714	1	1432.83	1.46883e-120	clathrin coat assembly protein AP180-like isoform X1	1800	P:GO:0006511; P:GO:0007163; P:GO:0007269; P:GO:0007270; P:GO:0009791; P:GO:0010770; P:GO:0010940; P:GO:0010976; P:GO:0016185; P:GO:0042331; P:GO:0045666; P:GO:0046907; P:GO:0048268; P:GO:0050772; P:GO:0051223; P:GO:0051899; P:GO:0090087; P:GO:0097480; P:GO:0098657; P:GO:0098693; P:GO:1900244; P:GO:1900275; P:GO:1902683; P:GO:1903539; P:GO:1904006; P:GO:1905445; P:GO:2000331; P:GO:2000370; P:GO:20…	P:ubiquitin-dependent protein catabolic process; P:establishment or maintenance of cell polarity; P:neurotransmitter secretion; P:neuron-neuron synaptic transmission; P:post-embryonic development; P:positive regulation of cell morphogenesis involved in differentiation; P:positive regulation of necrotic cell death; P:positive regulation of neuron projection development; P:synaptic vesicle budding …	NA	NA
jg23715	1	253.946	4.31747e-74	---NA---	210	NA	NA	NA	NA
jg23719	1	532.318	1.47896e-84	failed axon connections homolog	1233	NA	NA	NA	NA
jg23747	1	523.497	5.27228e-52	protein LRATD1	789	NA	NA	NA	NA
jg23752	1	605.859	1.30915e-59	protein phosphatase 1 regulatory subunit 14C	429	P:GO:0007165; P:GO:0032515; P:GO:0042325; P:GO:0043086; F:GO:0004864; F:GO:0004865; C:GO:0005737; C:GO:0016020	P:signal transduction; P:negative regulation of phosphoprotein phosphatase activity; P:regulation of phosphorylation; P:negative regulation of catalytic activity; F:protein phosphatase inhibitor activity; F:protein serine/threonine phosphatase inhibitor activity; C:cytoplasm; C:membrane	NA	NA
jg23795	1	734.774	4.79922e-126	E3 ubiquitin-protein ligase RNF19B isoform X1	1956	NA	NA	EC:2.3.2.31	RBR-type E3 ubiquitin transferase
jg23797	1	422.874	8.6999e-30	zinc finger protein 513a isoform X1	2112	NA	NA	NA	NA
jg23833	1	288.638	5.75901e-17	tubulin alpha-1B chain isoform X1	987	P:GO:0007010; P:GO:0007017; F:GO:0003924; F:GO:0005200; F:GO:0005525; C:GO:0005737; C:GO:0005874	P:cytoskeleton organization; P:microtubule-based process; F:GTPase activity; F:structural constituent of cytoskeleton; F:GTP binding; C:cytoplasm; C:microtubule	EC:3.6.1; EC:3.6; EC:3	Acting on acid anhydrides; Acting on acid anhydrides; Hydrolases
jg23836	1	1010.9	2.62051e-25	nuclear receptor coactivator 7 isoform X1	2448	P:GO:0008340; P:GO:0009408; P:GO:0010628; P:GO:0045944; P:GO:1900408; P:GO:1902083; P:GO:1903204; F:GO:0016922; F:GO:0030374; F:GO:0051427; C:GO:0005622	P:determination of adult lifespan; P:response to heat; P:positive regulation of gene expression; P:positive regulation of transcription by RNA polymerase II; P:negative regulation of cellular response to oxidative stress; P:negative regulation of peptidyl-cysteine S-nitrosylation; P:negative regulation of oxidative stress-induced neuron death; F:nuclear receptor binding; F:nuclear receptor coacti…	NA	NA
jg23885	1	1411.66	9.90707e-140	wiskott-Aldrich syndrome protein family member 1 isoform X1	1752	P:GO:0006898; P:GO:0016601; P:GO:0030036; P:GO:0030838; P:GO:0035046; P:GO:0051388; P:GO:0072673; P:GO:0097484; P:GO:0098657; P:GO:1990416; P:GO:2000601; F:GO:0003779; F:GO:0034237; F:GO:0071933; C:GO:0005737; C:GO:0005741; C:GO:0005856; C:GO:0005938; C:GO:0015629; C:GO:0030027; C:GO:0031209; C:GO:0032154; C:GO:0045120; C:GO:0099568	P:receptor-mediated endocytosis; P:Rac protein signal transduction; P:actin cytoskeleton organization; P:positive regulation of actin filament polymerization; P:pronuclear migration; P:positive regulation of neurotrophin TRK receptor signaling pathway; P:lamellipodium morphogenesis; P:dendrite extension; P:import into cell; P:cellular response to brain-derived neurotrophic factor stimulus; P:posi…	NA	NA
jg23890	1	1296.75	4.90177e-05	SAM and SH3 domain-containing protein 1a isoform X1	4224	P:GO:0007608	P:sensory perception of smell	NA	NA
jg23897	1	668.353	5.09783e-47	syntaxin-binding protein 5a isoform X1	3219	P:GO:0002791; P:GO:0006893; P:GO:0007163; P:GO:0007409; P:GO:0007616; P:GO:0016082; P:GO:0017156; P:GO:0043547; P:GO:0045921; P:GO:0046907; P:GO:0048489; P:GO:0050708; P:GO:0097480; P:GO:1900073; P:GO:1902075; F:GO:0005096; F:GO:0017075; F:GO:0031267; C:GO:0005829; C:GO:0005892; C:GO:0008021; C:GO:0030141; C:GO:0031201; C:GO:0031594	P:regulation of peptide secretion; P:Golgi to plasma membrane transport; P:establishment or maintenance of cell polarity; P:axonogenesis; P:long-term memory; P:synaptic vesicle priming; P:calcium-ion regulated exocytosis; P:positive regulation of GTPase activity; P:positive regulation of exocytosis; P:intracellular transport; P:synaptic vesicle transport; P:regulation of protein secretion; P:esta…	NA	NA
jg23925	1	5760.42	1.60345e-11	nesprin-1 isoform X2	26643	F:GO:0003779; C:GO:0005640; C:GO:0016021	F:actin binding; C:nuclear outer membrane; C:integral component of membrane	NA	NA
jg23938	1	1416.21	7.18401e-07	Tubby-related protein 4	4923	P:GO:0035493; P:GO:0043687; P:GO:0061512; P:GO:0099536; F:GO:0035091; F:GO:0043168; C:GO:0005829; C:GO:0005929	P:SNARE complex assembly; P:post-translational protein modification; P:protein localization to cilium; P:synaptic signaling; F:phosphatidylinositol binding; F:anion binding; C:cytosol; C:cilium	NA	NA
jg23958	1	707.147	9.22199e-51	otoferlin isoform X5	6255	P:GO:0007605; P:GO:0010996; P:GO:0016082; P:GO:0017156; P:GO:0046907; P:GO:0048489; P:GO:0050885; P:GO:0061025; P:GO:0090102; P:GO:0097480; F:GO:0005509; F:GO:0035612; C:GO:0005789; C:GO:0005829; C:GO:0016021; C:GO:0016323; C:GO:0030672; C:GO:0045177; C:GO:0048787	P:sensory perception of sound; P:response to auditory stimulus; P:synaptic vesicle priming; P:calcium-ion regulated exocytosis; P:intracellular transport; P:synaptic vesicle transport; P:neuromuscular process controlling balance; P:membrane fusion; P:cochlea development; P:establishment of synaptic vesicle localization; F:calcium ion binding; F:AP-2 adaptor complex binding; C:endoplasmic reticulu…	NA	NA
jg23993	1	727.108	4.00441e-113	glutamate receptor ionotropic, kainate 2-like isoform X2	1761	P:GO:0001662; P:GO:0001932; P:GO:0006357; P:GO:0006874; P:GO:0006886; P:GO:0007274; P:GO:0015833; P:GO:0019228; P:GO:0019722; P:GO:0030510; P:GO:0035235; P:GO:0035725; P:GO:0043113; P:GO:0043179; P:GO:0043524; P:GO:0043525; P:GO:0046328; P:GO:0048169; P:GO:0048172; P:GO:0050806; P:GO:0051967; P:GO:0060025; P:GO:0060079; P:GO:0060080; P:GO:0070588; P:GO:0071805; F:GO:0005234; F:GO:0015277; F:GO:00…	P:behavioral fear response; P:regulation of protein phosphorylation; P:regulation of transcription by RNA polymerase II; P:cellular calcium ion homeostasis; P:intracellular protein transport; P:neuromuscular synaptic transmission; P:peptide transport; P:neuronal action potential; P:calcium-mediated signaling; P:regulation of BMP signaling pathway; P:ionotropic glutamate receptor signaling pathway…	EC:7	Translocases
jg23994	1	240.75	1.86588e-97	glutamate receptor ionotropic, kainate 2-like isoform X2	993	P:GO:0001662; P:GO:0001932; P:GO:0006357; P:GO:0006874; P:GO:0006886; P:GO:0007274; P:GO:0015833; P:GO:0019228; P:GO:0019722; P:GO:0030510; P:GO:0034220; P:GO:0035235; P:GO:0035725; P:GO:0043113; P:GO:0043179; P:GO:0043524; P:GO:0043525; P:GO:0046328; P:GO:0048169; P:GO:0048172; P:GO:0050806; P:GO:0051967; P:GO:0060025; P:GO:0060079; P:GO:0060080; P:GO:0070588; P:GO:0071805; F:GO:0004970; F:GO:00…	P:behavioral fear response; P:regulation of protein phosphorylation; P:regulation of transcription by RNA polymerase II; P:cellular calcium ion homeostasis; P:intracellular protein transport; P:neuromuscular synaptic transmission; P:peptide transport; P:neuronal action potential; P:calcium-mediated signaling; P:regulation of BMP signaling pathway; P:ion transmembrane transport; P:ionotropic gluta…	EC:7	Translocases
jg24069	1	1024.68	2.02148e-87	gephyrin isoform X7	2502	P:GO:0006605; P:GO:0006777; P:GO:0007416; P:GO:0007529; P:GO:0010038; P:GO:0015833; P:GO:0018315; P:GO:0032324; P:GO:0040034; P:GO:0046039; P:GO:0051260; P:GO:0072579; P:GO:0097112; P:GO:0098880; P:GO:0098970; P:GO:1901068; F:GO:0005102; F:GO:0008940; F:GO:0015631; F:GO:0030674; F:GO:0042803; F:GO:0043546; F:GO:0061598; F:GO:0061599; F:GO:0098879; C:GO:0005634; C:GO:0005737; C:GO:0005886; C:GO:00…	P:protein targeting; P:Mo-molybdopterin cofactor biosynthetic process; P:synapse assembly; P:establishment of synaptic specificity at neuromuscular junction; P:response to metal ion; P:peptide transport; P:molybdenum incorporation into molybdenum-molybdopterin complex; P:molybdopterin cofactor biosynthetic process; P:regulation of development, heterochronic; P:GTP metabolic process; P:protein hom…	EC:2.10.1.1; EC:1; EC:1.7.99.4; EC:2.7; EC:2; EC:2.7.7.75; EC:1.7; EC:2.7.7	Molybdopterin molybdotransferase; Oxidoreductases; Nitrate reductase; Transferring phosphorus-containing groups; Transferases; Molybdopterin adenylyltransferase; Acting on other nitrogenous compounds as donors; Transferring phosphorus-containing groups
jg24079	1	537.243	6.13828e-123	sodium/potassium/calcium exchanger 4 isoform X1	1785	P:GO:0006816; P:GO:0006874; P:GO:0007608; P:GO:0035725; P:GO:0070588; P:GO:0071805; P:GO:0097186; P:GO:0098656; F:GO:0005262; F:GO:0005509; F:GO:0008273; F:GO:0030955; F:GO:0031402; C:GO:0005737; C:GO:0005887; C:GO:0120199	P:calcium ion transport; P:cellular calcium ion homeostasis; P:sensory perception of smell; P:sodium ion transmembrane transport; P:calcium ion transmembrane transport; P:potassium ion transmembrane transport; P:amelogenesis; P:anion transmembrane transport; F:calcium channel activity; F:calcium ion binding; F:calcium, potassium:sodium antiporter activity; F:potassium ion binding; F:sodium ion bi…	EC:7	Translocases
jg24108	1	1988.74	3.17819e-16	receptor-type tyrosine-protein phosphatase kappa isoform X3	4491	P:GO:0007179; P:GO:0010629; P:GO:0010839; P:GO:0030336; P:GO:0031175; P:GO:0034333; P:GO:0034394; P:GO:0034614; P:GO:0034644; P:GO:0035335; P:GO:0045786; P:GO:0045892; P:GO:0048041; F:GO:0005001; F:GO:0008013; F:GO:0019901; F:GO:0045295; C:GO:0001750; C:GO:0005887; C:GO:0005912; C:GO:0009986; C:GO:0030424; C:GO:0030425; C:GO:0031256; C:GO:0043025; C:GO:0043231	P:transforming growth factor beta receptor signaling pathway; P:negative regulation of gene expression; P:negative regulation of keratinocyte proliferation; P:negative regulation of cell migration; P:neuron projection development; P:adherens junction assembly; P:protein localization to cell surface; P:cellular response to reactive oxygen species; P:cellular response to UV; P:peptidyl-tyrosine dep…	EC:3.1; EC:3.1.3.48; EC:3; EC:3.1.3	Acting on ester bonds; Protein-tyrosine-phosphatase; Hydrolases; Acting on ester bonds
jg24121	1	221.514	2.00132e-45	ras-related protein Rab-15	642	P:GO:0002790; P:GO:0006904; P:GO:0007269; P:GO:0009306; P:GO:0017157; P:GO:0032482; F:GO:0003924; F:GO:0005525; F:GO:0032550; C:GO:0016020	P:peptide secretion; P:vesicle docking involved in exocytosis; P:neurotransmitter secretion; P:protein secretion; P:regulation of exocytosis; P:Rab protein signal transduction; F:GTPase activity; F:GTP binding; F:purine ribonucleoside binding; C:membrane	EC:3.6.1; EC:3.6; EC:3	Acting on acid anhydrides; Acting on acid anhydrides; Hydrolases
jg24143	1	1138.44	5.9853e-74	neuroendocrine protein 7B2	750	P:GO:0006886; P:GO:0006937; P:GO:0007218; P:GO:0010466; P:GO:0010952; P:GO:0015833; P:GO:0016486; P:GO:0046883; F:GO:0005525; F:GO:0016504; F:GO:0030414; F:GO:0032550; F:GO:0051082; C:GO:0005576; C:GO:0005634; C:GO:0030141	P:intracellular protein transport; P:regulation of muscle contraction; P:neuropeptide signaling pathway; P:negative regulation of peptidase activity; P:positive regulation of peptidase activity; P:peptide transport; P:peptide hormone processing; P:regulation of hormone secretion; F:GTP binding; F:peptidase activator activity; F:peptidase inhibitor activity; F:purine ribonucleoside binding; F:unfo…	NA	NA
jg24170	1	431.878	1.002e-122	transcription factor AP-2-beta isoform X2	1569	P:GO:0000122; P:GO:0002121; P:GO:0007485; P:GO:0008049; P:GO:0008343; P:GO:0008344; P:GO:0010628; P:GO:0010629; P:GO:0016348; P:GO:0042127; P:GO:0045944; P:GO:0048728; F:GO:0000977; F:GO:0000981; C:GO:0005634	P:negative regulation of transcription by RNA polymerase II; P:inter-male aggressive behavior; P:imaginal disc-derived male genitalia development; P:male courtship behavior; P:adult feeding behavior; P:adult locomotory behavior; P:positive regulation of gene expression; P:negative regulation of gene expression; P:imaginal disc-derived leg joint morphogenesis; P:regulation of cell population proli…	NA	NA
jg24173	1	820.34	2.02059e-115	low-density lipoprotein receptor-related protein 11	1671	P:GO:0010951; F:GO:0004867; C:GO:0016021	P:negative regulation of endopeptidase activity; F:serine-type endopeptidase inhibitor activity; C:integral component of membrane	NA	NA
jg24178	1	567.581	1.23716e-38	kinesin-like protein KIF3C isoform X2	2214	P:GO:0006890; P:GO:0007608; P:GO:0008089; P:GO:0010976; P:GO:0019886; P:GO:0030951; P:GO:0035735; P:GO:0045666; P:GO:0050769; P:GO:0072384; F:GO:0003777; F:GO:0008017; F:GO:0016887; F:GO:0019894; C:GO:0005829; C:GO:0005871; C:GO:0008021; C:GO:0016020; C:GO:0030425; C:GO:0030426; C:GO:0030993; C:GO:0035371; C:GO:0043025; C:GO:0071598; C:GO:0097542; C:GO:1990904	P:retrograde vesicle-mediated transport, Golgi to endoplasmic reticulum; P:sensory perception of smell; P:anterograde axonal transport; P:positive regulation of neuron projection development; P:antigen processing and presentation of exogenous peptide antigen via MHC class II; P:establishment or maintenance of microtubule cytoskeleton polarity; P:intraciliary transport involved in cilium assembly;…	EC:3.6.1; EC:3.6; EC:3	Acting on acid anhydrides; Acting on acid anhydrides; Hydrolases
jg24183	1	2744.38	3.40344e-68	dihydropyrimidinase-related protein 5-like	1995	P:GO:0007411; F:GO:0008017; F:GO:0016810; C:GO:0005737; C:GO:0005874	P:axon guidance; F:microtubule binding; F:hydrolase activity, acting on carbon-nitrogen (but not peptide) bonds; C:cytoplasm; C:microtubule	EC:3.5; EC:3	Acting on carbon-nitrogen bonds, other than peptide bonds; Hydrolases
jg24215	1	489.817	1.52306e-81	protein FAM184A isoform X2	3468	NA	NA	NA	NA
jg24295	1	732.946	3.51826e-86	myelin transcription factor 1-like, a isoform X1	4020	P:GO:0000122; P:GO:0006355; P:GO:0010628; P:GO:0010629; P:GO:0045944; P:GO:0048665; P:GO:0048666; F:GO:0001227; F:GO:0001228; F:GO:0003677; F:GO:0003713; F:GO:0008270; F:GO:0044323; F:GO:0050897; C:GO:0005634	P:negative regulation of transcription by RNA polymerase II; P:regulation of transcription, DNA-templated; P:positive regulation of gene expression; P:negative regulation of gene expression; P:positive regulation of transcription by RNA polymerase II; P:neuron fate specification; P:neuron development; F:DNA-binding transcription repressor activity, RNA polymerase II-specific; F:DNA-binding transc…	NA	NA
jg24343	1	1917.96	5.53877e-117	visinin-like protein 1	723	F:GO:0005509	F:calcium ion binding	NA	NA
jg24352	1	318.138	5.42677e-91	kinesin-like protein KIF26B	5910	P:GO:0007018; F:GO:0005524; F:GO:0008017	P:microtubule-based movement; F:ATP binding; F:microtubule binding	NA	NA
jg24411	1	219.37	4.66306e-27	5'-nucleotidase domain-containing protein 1	861	P:GO:0016311; F:GO:0008253; F:GO:0016787; F:GO:0046872	P:dephosphorylation; F:5'-nucleotidase activity; F:hydrolase activity; F:metal ion binding	EC:3.1; EC:3; EC:3.1.3.5; EC:3.1.3	Acting on ester bonds; Hydrolases; 5'-nucleotidase; Acting on ester bonds
jg24508	1	1051.49	2.78389e-113	stathmin-4	567	P:GO:0002066; P:GO:0007019; P:GO:0007298; P:GO:0008088; P:GO:0008354; P:GO:0031110; P:GO:0031175; P:GO:0045664; P:GO:0051124; P:GO:1902749; F:GO:0008017; C:GO:0005794; C:GO:0005875; C:GO:0031594; C:GO:0043005	P:columnar/cuboidal epithelial cell development; P:microtubule depolymerization; P:border follicle cell migration; P:axo-dendritic transport; P:germ cell migration; P:regulation of microtubule polymerization or depolymerization; P:neuron projection development; P:regulation of neuron differentiation; P:synaptic assembly at neuromuscular junction; P:regulation of cell cycle G2/M phase transition; …	NA	NA
jg24511	1	4870.12	7.98539e-100	synaptosomal-associated protein 25-A	615	P:GO:0000281; P:GO:0001504; P:GO:0007409; P:GO:0007616; P:GO:0007626; P:GO:0008306; P:GO:0010975; P:GO:0016081; P:GO:0016082; P:GO:0016197; P:GO:0030252; P:GO:0030431; P:GO:0031629; P:GO:0031915; P:GO:0032024; P:GO:0035493; P:GO:0043312; P:GO:0045026; P:GO:0045664; P:GO:0048489; P:GO:0048791; P:GO:0050767; P:GO:0051963; P:GO:0060291; P:GO:0071805; P:GO:0097480; P:GO:0098881; P:GO:0098967; P:GO:00…	P:mitotic cytokinesis; P:neurotransmitter uptake; P:axonogenesis; P:long-term memory; P:locomotory behavior; P:associative learning; P:regulation of neuron projection development; P:synaptic vesicle docking; P:synaptic vesicle priming; P:endosomal transport; P:growth hormone secretion; P:sleep; P:synaptic vesicle fusion to presynaptic active zone membrane; P:positive regulation of synaptic plasti…	EC:7	Translocases
jg24512	1	1597.75	9.58034e-78	---NA---	255	NA	NA	NA	NA
jg6979	1	165.683	1.09599e-64	seizure protein 6 homolog	1428	C:GO:0016021	C:integral component of membrane	NA	NA
jg7017	1	562.351	1.26492e-65	small G protein signaling modulator 2 isoform X1	3453	P:GO:0006886; P:GO:0015833; P:GO:0031338; P:GO:0090630; P:GO:1990502; F:GO:0005096; F:GO:0031267; C:GO:0000138; C:GO:0005769; C:GO:0005797; C:GO:0005829	P:intracellular protein transport; P:peptide transport; P:regulation of vesicle fusion; P:activation of GTPase activity; P:dense core granule maturation; F:GTPase activator activity; F:small GTPase binding; C:Golgi trans cisterna; C:early endosome; C:Golgi medial cisterna; C:cytosol	NA	NA
jg7035	1	187.181	1.1566e-65	leucine-rich repeat and fibronectin type III domain-containing protein 1-like protein	1923	P:GO:0007409; C:GO:0005615; C:GO:0005886; C:GO:0009986; C:GO:0016021	P:axonogenesis; C:extracellular space; C:plasma membrane; C:cell surface; C:integral component of membrane	NA	NA
jg7070	1	194.603	2.2782e-09	WD repeat-containing protein 20	2049	P:GO:0016579	P:protein deubiquitination	NA	NA
jg7076	1	375.461	8.2993e-77	polypeptide N-acetylgalactosaminyltransferase 17	1734	P:GO:0006486; F:GO:0004653; F:GO:0030246; C:GO:0000139; C:GO:0016021	P:protein glycosylation; F:polypeptide N-acetylgalactosaminyltransferase activity; F:carbohydrate binding; C:Golgi membrane; C:integral component of membrane	EC:2.4; EC:2; EC:2.4.1.41; EC:2.4.1	Glycosyltransferases; Transferases; Polypeptide N-acetylgalactosaminyltransferase; Glycosyltransferases
jg7089	1	426.249	3.01252e-41	histone acetyltransferase KAT6B	3255	NA	NA	NA	NA
jg7094	1	1063.68	2.05672e-44	spectrin beta chain, non-erythrocytic 4-like isoform X1	8088	P:GO:0051693; F:GO:0003779; F:GO:0005200; F:GO:0005543; C:GO:0008091	P:actin filament capping; F:actin binding; F:structural constituent of cytoskeleton; F:phospholipid binding; C:spectrin	NA	NA
jg7112	1	505.412	0.000102947	MAP/microtubule affinity-regulating kinase 4-like isoform X1	2352	P:GO:0006468; F:GO:0005524; F:GO:0106310; C:GO:0030425	P:protein phosphorylation; F:ATP binding; F:protein serine kinase activity; C:dendrite	EC:2.7.1; EC:2.7.11.1; EC:2.7; EC:2	Transferring phosphorus-containing groups; Non-specific serine/threonine protein kinase; Transferring phosphorus-containing groups; Transferases
jg7123	1	1076.05	3.21944e-23	flotillin-2	1287	P:GO:0001765; P:GO:0002793; P:GO:0008544; P:GO:0010629; P:GO:0035011; P:GO:0035593; P:GO:0044860; P:GO:0045661; P:GO:0050821; P:GO:0061357; P:GO:0072659; P:GO:1902992; P:GO:1903905; F:GO:0002020; F:GO:0005198; F:GO:0035255; F:GO:0046982; C:GO:0001931; C:GO:0002080; C:GO:0005768; C:GO:0005912; C:GO:0016020; C:GO:0016323; C:GO:0016600; C:GO:0030027; C:GO:0030139; C:GO:0044291; C:GO:0048471	P:membrane raft assembly; P:positive regulation of peptide secretion; P:epidermis development; P:negative regulation of gene expression; P:melanotic encapsulation of foreign target; P:positive regulation of Wnt signaling pathway by establishment of Wnt protein localization to extracellular region; P:protein localization to plasma membrane raft; P:regulation of myoblast differentiation; P:protein …	NA	NA
jg7162	1	336.586	3.53507e-90	synapse differentiation-inducing gene protein 1	738	C:GO:0016021	C:integral component of membrane	NA	NA
jg7196	1	697.902	1.41603e-08	nectin cell adhesion molecule 1b	1467	P:GO:0002089; P:GO:0002934; P:GO:0006826; P:GO:0006955; P:GO:0007155; P:GO:0007156; P:GO:0007157; P:GO:0007165; P:GO:0007411; P:GO:0008037; P:GO:0019062; P:GO:0034332; P:GO:0046598; P:GO:0051704; P:GO:0051960; P:GO:0051963; P:GO:0060041; P:GO:0070166; P:GO:1902414; F:GO:0005102; F:GO:0015026; F:GO:0030246; F:GO:0042803; F:GO:0046790; F:GO:0046982; F:GO:0050839; C:GO:0005576; C:GO:0005887; C:GO:00…	P:lens morphogenesis in camera-type eye; P:desmosome organization; P:iron ion transport; P:immune response; P:cell adhesion; P:homophilic cell adhesion via plasma membrane adhesion molecules; P:heterophilic cell-cell adhesion via plasma membrane cell adhesion molecules; P:signal transduction; P:axon guidance; P:cell recognition; P:virion attachment to host cell; P:adherens junction organization; …	NA	NA
jg7210	1	1661.92	2.70237e-70	teneurin-4 isoform X1	8601	P:GO:0001702; P:GO:0001941; P:GO:0007156; P:GO:0007157; P:GO:0007165; P:GO:0007274; P:GO:0007276; P:GO:0007413; P:GO:0008045; P:GO:0008584; P:GO:0008585; P:GO:0009792; P:GO:0010976; P:GO:0016200; P:GO:0022416; P:GO:0030421; P:GO:0031122; P:GO:0031643; P:GO:0032289; P:GO:0034110; P:GO:0034116; P:GO:0040017; P:GO:0040032; P:GO:0040039; P:GO:0045467; P:GO:0045666; P:GO:0048058; P:GO:0048499; P:GO:00…	P:gastrulation with mouth forming second; P:postsynaptic membrane organization; P:homophilic cell adhesion via plasma membrane adhesion molecules; P:heterophilic cell-cell adhesion via plasma membrane cell adhesion molecules; P:signal transduction; P:neuromuscular synaptic transmission; P:gamete generation; P:axonal fasciculation; P:motor neuron axon guidance; P:male gonad development; P:female g…	NA	NA
jg7217	1	663.565	2.79095e-21	guanylyl cyclase-activating protein 3	1332	P:GO:0031284; F:GO:0005509; F:GO:0008048; C:GO:0110165	P:positive regulation of guanylate cyclase activity; F:calcium ion binding; F:calcium sensitive guanylate cyclase activator activity; C:cellular anatomical entity	NA	NA
jg7230	1	762.097	1.17102e-54	microtubule-associated tumor suppressor candidate 2 isoform X1	3660	F:GO:0008017; F:GO:0042803; C:GO:0005634; C:GO:0015630; C:GO:0045171	F:microtubule binding; F:protein homodimerization activity; C:nucleus; C:microtubule cytoskeleton; C:intercellular bridge	NA	NA
jg7254	1	465.354	6.28389e-17	serine/threonine-protein kinase DCLK1-like isoform X1	2253	P:GO:0001764; P:GO:0006468; P:GO:0007026; P:GO:0009615; P:GO:0016197; P:GO:0018105; P:GO:0018107; P:GO:0021952; P:GO:0030900; P:GO:0035556; P:GO:0040001; P:GO:0046777; P:GO:0048675; P:GO:0048813; P:GO:0051704; P:GO:1900181; F:GO:0004672; F:GO:0004683; F:GO:0005516; F:GO:0005524; F:GO:0008017; F:GO:0009931; C:GO:0005634; C:GO:0005737; C:GO:0005813; C:GO:0005875; C:GO:0005887; C:GO:0014069; C:GO:00…	P:neuron migration; P:protein phosphorylation; P:negative regulation of microtubule depolymerization; P:response to virus; P:endosomal transport; P:peptidyl-serine phosphorylation; P:peptidyl-threonine phosphorylation; P:central nervous system projection neuron axonogenesis; P:forebrain development; P:intracellular signal transduction; P:establishment of mitotic spindle localization; P:protein au…	EC:2.7.1; EC:2.7.11.1; EC:2.7; EC:2; EC:2.7.11.17	Transferring phosphorus-containing groups; Non-specific serine/threonine protein kinase; Transferring phosphorus-containing groups; Transferases; Calcium/calmodulin-dependent protein kinase
jg7257	1	1648.04	2.47245e-62	putative nucleotidyltransferase MAB21L1	1080	P:GO:0008284; P:GO:0009653; P:GO:0009792; P:GO:0043010; P:GO:0045165; F:GO:0000166; F:GO:0016779; F:GO:0046872; C:GO:0005634; C:GO:0016021	P:positive regulation of cell population proliferation; P:anatomical structure morphogenesis; P:embryo development ending in birth or egg hatching; P:camera-type eye development; P:cell fate commitment; F:nucleotide binding; F:nucleotidyltransferase activity; F:metal ion binding; C:nucleus; C:integral component of membrane	EC:2.7; EC:2; EC:2.7.7	Transferring phosphorus-containing groups; Transferases; Transferring phosphorus-containing groups
jg7267	1	3179.82	2.94621e-16	protein furry homolog isoform X1	9177	P:GO:0008407; P:GO:0010628; P:GO:0010769; P:GO:0035317; P:GO:0042052; P:GO:0043086; P:GO:0045664; P:GO:0045860; P:GO:0045893; P:GO:0048601; P:GO:0048800; P:GO:0048814; P:GO:0050767; P:GO:0070593; P:GO:0090527; P:GO:1904428; F:GO:0004857; F:GO:0005515; C:GO:0005938; C:GO:0030424; C:GO:0030425; C:GO:0030427; C:GO:0044297; C:GO:0045177; C:GO:0099568	P:chaeta morphogenesis; P:positive regulation of gene expression; P:regulation of cell morphogenesis involved in differentiation; P:imaginal disc-derived wing hair organization; P:rhabdomere development; P:negative regulation of catalytic activity; P:regulation of neuron differentiation; P:positive regulation of protein kinase activity; P:positive regulation of transcription, DNA-templated; P:ooc…	NA	NA
jg7269	1	456.009	7.408e-30	beta 3-glucosyltransferase a	1497	P:GO:0036066; F:GO:0016757; C:GO:0005789; C:GO:0016021	P:protein O-linked fucosylation; F:glycosyltransferase activity; C:endoplasmic reticulum membrane; C:integral component of membrane	EC:2.4; EC:2	Glycosyltransferases; Transferases
jg7278	1	1874.13	7.96415e-87	roundabout homolog 2 isoform X4	4683	P:GO:0001656; P:GO:0001657; P:GO:0001764; P:GO:0003148; P:GO:0003180; P:GO:0003184; P:GO:0003272; P:GO:0007156; P:GO:0007419; P:GO:0007426; P:GO:0007432; P:GO:0008039; P:GO:0008045; P:GO:0009649; P:GO:0010770; P:GO:0010976; P:GO:0016199; P:GO:0016319; P:GO:0021884; P:GO:0021891; P:GO:0022409; P:GO:0031290; P:GO:0032870; P:GO:0033563; P:GO:0035050; P:GO:0035385; P:GO:0035481; P:GO:0035904; P:GO:00…	P:metanephros development; P:ureteric bud development; P:neuron migration; P:outflow tract septum morphogenesis; P:aortic valve morphogenesis; P:pulmonary valve morphogenesis; P:endocardial cushion formation; P:homophilic cell adhesion via plasma membrane adhesion molecules; P:ventral cord development; P:tracheal outgrowth, open tracheal system; P:salivary gland boundary specification; P:synaptic…	NA	NA
jg7287	1	4754.23	1.97032e-29	amyloid-beta A4 precursor protein-binding family B member 1 isoform X1	2058	P:GO:0002119; P:GO:0007631; P:GO:0009792; F:GO:0001540	P:nematode larval development; P:feeding behavior; P:embryo development ending in birth or egg hatching; F:amyloid-beta binding	NA	NA
jg7307	1	2696.31	3.9903e-33	14-3-3 protein gamma-B	744	NA	NA	NA	NA
jg7322	1	429.29	8.06586e-26	dynein light chain 2, cytoplasmic isoform X1	324	P:GO:0006888; P:GO:0007017; P:GO:0016236; P:GO:0019886; P:GO:0032781; P:GO:0035735; F:GO:0003676; F:GO:0008092; F:GO:0042803; F:GO:0045505; F:GO:0046982; F:GO:0051959; F:GO:0097110; C:GO:0005737; C:GO:0005813; C:GO:0005829; C:GO:0005868; C:GO:0005874; C:GO:0005886; C:GO:0030286; C:GO:0031475; C:GO:0097542	P:endoplasmic reticulum to Golgi vesicle-mediated transport; P:microtubule-based process; P:macroautophagy; P:antigen processing and presentation of exogenous peptide antigen via MHC class II; P:positive regulation of ATPase activity; P:intraciliary transport involved in cilium assembly; F:nucleic acid binding; F:cytoskeletal protein binding; F:protein homodimerization activity; F:dynein intermed…	NA	NA
jg7345	1	128.66	3.17281e-56	reticulon-4 receptor-like 1b	1353	NA	NA	NA	NA
jg7360	1	220.943	1.52239e-64	leucine-rich repeat and fibronectin type III domain-containing protein 1	2277	P:GO:0007409; C:GO:0005615; C:GO:0005886; C:GO:0009986; C:GO:0016021	P:axonogenesis; C:extracellular space; C:plasma membrane; C:cell surface; C:integral component of membrane	NA	NA
jg7362	1	1512.54	1.04052e-36	dixin-A isoform X1	1383	P:GO:0001934; P:GO:0010770; P:GO:0010976; P:GO:0021695; P:GO:0021799; P:GO:0021869; P:GO:0032956; P:GO:0043010; P:GO:0045665; P:GO:0045666; P:GO:0046330; P:GO:0050768; P:GO:0050772; P:GO:0060070; P:GO:0070507; P:GO:0090263; F:GO:0019904; F:GO:0031435; F:GO:0042803; F:GO:0043015; C:GO:0005829; C:GO:0005912; C:GO:0005925; C:GO:0032991; C:GO:0043025; C:GO:0043679	P:positive regulation of protein phosphorylation; P:positive regulation of cell morphogenesis involved in differentiation; P:positive regulation of neuron projection development; P:cerebellar cortex development; P:cerebral cortex radially oriented cell migration; P:forebrain ventricular zone progenitor cell division; P:regulation of actin cytoskeleton organization; P:camera-type eye development; …	NA	NA
jg7366	1	1079.04	4.0759e-87	neural cell adhesion molecule 1b isoform X2	3693	P:GO:0000165; P:GO:0001746; P:GO:0001928; P:GO:0006468; P:GO:0007156; P:GO:0007413; P:GO:0007568; P:GO:0007614; P:GO:0008045; P:GO:0008355; P:GO:0008360; P:GO:0008582; P:GO:0009410; P:GO:0009636; P:GO:0010288; P:GO:0014012; P:GO:0014823; P:GO:0016319; P:GO:0016338; P:GO:0017157; P:GO:0021794; P:GO:0031100; P:GO:0033555; P:GO:0034109; P:GO:0035158; P:GO:0042059; P:GO:0042220; P:GO:0045665; P:GO:00…	P:MAPK cascade; P:Bolwig's organ morphogenesis; P:regulation of exocyst assembly; P:protein phosphorylation; P:homophilic cell adhesion via plasma membrane adhesion molecules; P:axonal fasciculation; P:aging; P:short-term memory; P:motor neuron axon guidance; P:olfactory learning; P:regulation of cell shape; P:regulation of synaptic assembly at neuromuscular junction; P:response to xenobiotic sti…	NA	NA
jg7370	1	529.262	5.6762e-94	protein turtle homolog B isoform X1	4386	P:GO:0007156; P:GO:0007414; P:GO:0007629; P:GO:0007638; P:GO:0008039; P:GO:0009967; P:GO:0010769; P:GO:0016199; P:GO:0030537; P:GO:0045467; P:GO:0045664; P:GO:0048814; P:GO:0050767; P:GO:0050806; P:GO:0070593; P:GO:0097151; F:GO:0019900; F:GO:0098632; C:GO:0005887; C:GO:0030425; C:GO:0043025; C:GO:0060077	P:homophilic cell adhesion via plasma membrane adhesion molecules; P:axonal defasciculation; P:flight behavior; P:mechanosensory behavior; P:synaptic target recognition; P:positive regulation of signal transduction; P:regulation of cell morphogenesis involved in differentiation; P:axon midline choice point recognition; P:larval behavior; P:R7 cell development; P:regulation of neuron differentiati…	NA	NA
jg7372	1	304.897	4.38899e-49	junctional adhesion molecule C	909	P:GO:0007155; F:GO:0042803; F:GO:0046982; C:GO:0016021	P:cell adhesion; F:protein homodimerization activity; F:protein heterodimerization activity; C:integral component of membrane	NA	NA
jg7393	1	455.722	4.52056e-48	microtubule-associated protein 6 homolog isoform X2	996	P:GO:0010770; P:GO:0010976; P:GO:0019896; P:GO:0032418; P:GO:0045666; P:GO:0048813; P:GO:0050772; P:GO:0070507; F:GO:0008017; C:GO:0005794; C:GO:0005874; C:GO:0030424; C:GO:0030425; C:GO:0048471; C:GO:0099503	P:positive regulation of cell morphogenesis involved in differentiation; P:positive regulation of neuron projection development; P:axonal transport of mitochondrion; P:lysosome localization; P:positive regulation of neuron differentiation; P:dendrite morphogenesis; P:positive regulation of axonogenesis; P:regulation of microtubule cytoskeleton organization; F:microtubule binding; C:Golgi apparatu…	NA	NA
jg7468	1	255.29	1.66401e-55	syntaxin-1A isoform X1	864	P:GO:0000281; P:GO:0001956; P:GO:0006836; P:GO:0006886; P:GO:0007271; P:GO:0007274; P:GO:0007317; P:GO:0007349; P:GO:0007482; P:GO:0008286; P:GO:0009629; P:GO:0010701; P:GO:0010807; P:GO:0016081; P:GO:0017157; P:GO:0019221; P:GO:0019722; P:GO:0031629; P:GO:0031646; P:GO:0032386; P:GO:0035493; P:GO:0040011; P:GO:0040014; P:GO:0045026; P:GO:0045956; P:GO:0045995; P:GO:0050796; P:GO:0060281; P:GO:00…	P:mitotic cytokinesis; P:positive regulation of neurotransmitter secretion; P:neurotransmitter transport; P:intracellular protein transport; P:synaptic transmission, cholinergic; P:neuromuscular synaptic transmission; P:regulation of pole plasm oskar mRNA localization; P:cellularization; P:haltere development; P:insulin receptor signaling pathway; P:response to gravity; P:positive regulation of n…	NA	NA
jg7472	1	449.563	4.86044e-16	SH2B adapter protein 2	2091	P:GO:0001922; P:GO:0001934; P:GO:0007165; P:GO:0007399; P:GO:0007596; P:GO:0008284; P:GO:0008286; P:GO:0014068; P:GO:0019221; P:GO:0030036; P:GO:0030307; P:GO:0038202; P:GO:0042593; P:GO:0046325; P:GO:0046425; P:GO:0046578; P:GO:0050851; P:GO:0050873; P:GO:0060180; P:GO:0070328; P:GO:0070374; P:GO:1904778; F:GO:0005068; F:GO:0008269; F:GO:0035591; F:GO:0042802; C:GO:0001725; C:GO:0001726; C:GO:00…	P:B-1 B cell homeostasis; P:positive regulation of protein phosphorylation; P:signal transduction; P:nervous system development; P:blood coagulation; P:positive regulation of cell population proliferation; P:insulin receptor signaling pathway; P:positive regulation of phosphatidylinositol 3-kinase signaling; P:cytokine-mediated signaling pathway; P:actin cytoskeleton organization; P:positive regu…	NA	NA
jg7495	1	325.395	2.50501e-56	tetratricopeptide repeat protein 9B	747	NA	NA	NA	NA
jg7548	1	441.698	5.2809e-40	Down syndrome cell adhesion molecule-like protein 1 homolog isoform X1	6270	P:GO:0001709; P:GO:0007155; P:GO:0007156; P:GO:0007162; P:GO:0007409; P:GO:0007416; P:GO:0007417; P:GO:0007420; P:GO:0009953; P:GO:0010842; P:GO:0016338; P:GO:0048704; P:GO:0060219; P:GO:0070593; F:GO:0042803; C:GO:0005886; C:GO:0009986; C:GO:0016021; C:GO:0045202	P:cell fate determination; P:cell adhesion; P:homophilic cell adhesion via plasma membrane adhesion molecules; P:negative regulation of cell adhesion; P:axonogenesis; P:synapse assembly; P:central nervous system development; P:brain development; P:dorsal/ventral pattern formation; P:retina layer formation; P:calcium-independent cell-cell adhesion via plasma membrane cell-adhesion molecules; P:emb…	NA	NA
jg7552	1	402.233	6.17783e-32	FXYD domain-containing ion transport regulator 6-like	381	P:GO:0043269; P:GO:2000649; F:GO:0017080; F:GO:0099106; C:GO:0005887; C:GO:0016021	P:regulation of ion transport; P:regulation of sodium ion transmembrane transporter activity; F:sodium channel regulator activity; F:ion channel regulator activity; C:integral component of plasma membrane; C:integral component of membrane	NA	NA
jg7565	1	327.816	9.4316e-104	short stature homeobox protein 2 isoform X2	870	P:GO:0000122; P:GO:0001649; P:GO:0002053; P:GO:0002063; P:GO:0003170; P:GO:0003209; P:GO:0006357; P:GO:0010628; P:GO:0010629; P:GO:0010770; P:GO:0010831; P:GO:0010976; P:GO:0032330; P:GO:0035115; P:GO:0045666; P:GO:0045880; P:GO:0045944; P:GO:0048557; P:GO:0048743; P:GO:0050772; P:GO:0060272; P:GO:0060351; P:GO:0060415; P:GO:2000172; F:GO:0000981; F:GO:0001227; F:GO:0003677; F:GO:0043565; C:GO:00…	P:negative regulation of transcription by RNA polymerase II; P:osteoblast differentiation; P:positive regulation of mesenchymal cell proliferation; P:chondrocyte development; P:heart valve development; P:cardiac atrium morphogenesis; P:regulation of transcription by RNA polymerase II; P:positive regulation of gene expression; P:negative regulation of gene expression; P:positive regulation of cell…	NA	NA
jg7579	1	176.759	8.53871e-62	dopamine receptor D2a	1767	P:GO:0001659; P:GO:0001666; P:GO:0001933; P:GO:0001963; P:GO:0001975; P:GO:0001976; P:GO:0002027; P:GO:0002028; P:GO:0002031; P:GO:0002052; P:GO:0002092; P:GO:0006805; P:GO:0006914; P:GO:0007187; P:GO:0007194; P:GO:0007195; P:GO:0007270; P:GO:0007409; P:GO:0007416; P:GO:0007608; P:GO:0007615; P:GO:0007616; P:GO:0007625; P:GO:0007628; P:GO:0008285; P:GO:0008542; P:GO:0009636; P:GO:0010039; P:GO:00…	P:temperature homeostasis; P:response to hypoxia; P:negative regulation of protein phosphorylation; P:synaptic transmission, dopaminergic; P:response to amphetamine; P:nervous system process involved in regulation of systemic arterial blood pressure; P:regulation of heart rate; P:regulation of sodium ion transport; P:G protein-coupled receptor internalization; P:positive regulation of neuroblast …	NA	NA
jg7580	1	507.155	4.66008e-151	sodium channel subunit beta-3 isoform X1	678	P:GO:0007399; P:GO:0010460; P:GO:0010765; P:GO:0019233; P:GO:0034765; P:GO:0035725; P:GO:0060371; P:GO:0060373; P:GO:0072659; P:GO:0086005; P:GO:0086012; P:GO:0086014; P:GO:0086015; P:GO:0086091; P:GO:2000649; F:GO:0005244; F:GO:0005272; F:GO:0017080; F:GO:0044325; F:GO:0086006; C:GO:0001518; C:GO:0030018	P:nervous system development; P:positive regulation of heart rate; P:positive regulation of sodium ion transport; P:sensory perception of pain; P:regulation of ion transmembrane transport; P:sodium ion transmembrane transport; P:regulation of atrial cardiac muscle cell membrane depolarization; P:regulation of ventricular cardiac muscle cell membrane depolarization; P:protein localization to plasm…	EC:7	Translocases
jg7597	1	2459.9	1.12601e-12	histone-lysine N-methyltransferase 2A isoform X1	13539	P:GO:0008285; P:GO:0008542; P:GO:0009791; P:GO:0009952; P:GO:0010628; P:GO:0018026; P:GO:0032411; P:GO:0032922; P:GO:0035162; P:GO:0035640; P:GO:0043984; P:GO:0044648; P:GO:0045652; P:GO:0045944; P:GO:0048172; P:GO:0048536; P:GO:0048873; P:GO:0051571; P:GO:0060216; P:GO:0065003; P:GO:0071440; P:GO:0080182; P:GO:1901674; P:GO:1902036; P:GO:1905269; P:GO:1905642; P:GO:2000615; P:GO:2001040; F:GO:00…	P:negative regulation of cell population proliferation; P:visual learning; P:post-embryonic development; P:anterior/posterior pattern specification; P:positive regulation of gene expression; P:peptidyl-lysine monomethylation; P:positive regulation of transporter activity; P:circadian regulation of gene expression; P:embryonic hemopoiesis; P:exploration behavior; P:histone H4-K16 acetylation; P:hi…	EC:2.1; EC:2.1.1.43; EC:2; EC:2.1.1.354; EC:2.1.1	Transferring one-carbon groups; Transferring one-carbon groups; Transferases; [Histone H3]-lysine(4) N-trimethyltransferase; Transferring one-carbon groups
jg7616	1	170.258	3.34274e-41	---NA---	249	NA	NA	NA	NA
jg7617	1	182.484	6.6444e-39	coiled-coil domain-containing protein 92	849	NA	NA	NA	NA
jg7627	1	452.346	8.9788e-33	NAD(+) hydrolase SARM1	2139	P:GO:0002683; P:GO:0009749; P:GO:0010769; P:GO:0034128; P:GO:0042981; P:GO:0045088; P:GO:0045664; P:GO:0048678; P:GO:0048814; P:GO:0050767; P:GO:1901214; C:GO:0005829; C:GO:0005874; C:GO:0030424; C:GO:0030425; C:GO:0031315; C:GO:0043025; C:GO:0045202	P:negative regulation of immune system process; P:response to glucose; P:regulation of cell morphogenesis involved in differentiation; P:negative regulation of MyD88-independent toll-like receptor signaling pathway; P:regulation of apoptotic process; P:regulation of innate immune response; P:regulation of neuron differentiation; P:response to axon injury; P:regulation of dendrite morphogenesis; P…	NA	NA
jg7632	1	6351.15	3.70838e-60	crystallin, beta B1, like 3	759	NA	NA	NA	NA
jg7650	1	130.534	9.69774e-79	leucine-rich repeat and fibronectin type III domain-containing protein 1-like protein isoform X1	2028	C:GO:0016021	C:integral component of membrane	NA	NA
jg7670	1	759.179	4.04095e-07	rho guanine nucleotide exchange factor 17-like	3180	P:GO:0007186; P:GO:0030036; P:GO:0043065; P:GO:0050790; P:GO:0051056; F:GO:0005085; F:GO:0031267; C:GO:0005829	P:G protein-coupled receptor signaling pathway; P:actin cytoskeleton organization; P:positive regulation of apoptotic process; P:regulation of catalytic activity; P:regulation of small GTPase mediated signal transduction; F:guanyl-nucleotide exchange factor activity; F:small GTPase binding; C:cytosol	NA	NA
jg7683	1	400.95	3.50332e-82	glutamate receptor 4a isoform X2	1479	P:GO:0034220; P:GO:0035235; F:GO:0004970; C:GO:0016021; C:GO:0045211	P:ion transmembrane transport; P:ionotropic glutamate receptor signaling pathway; F:ionotropic glutamate receptor activity; C:integral component of membrane; C:postsynaptic membrane	EC:7	Translocases
jg7729	1	878.58	2.92436e-16	cGMP-dependent 3',5'-cyclic phosphodiesterase isoform X2	2844	P:GO:0000122; P:GO:0001101; P:GO:0003170; P:GO:0003281; P:GO:0006198; P:GO:0007187; P:GO:0007193; P:GO:0007602; P:GO:0007635; P:GO:0008340; P:GO:0009636; P:GO:0010446; P:GO:0010469; P:GO:0010628; P:GO:0010629; P:GO:0010753; P:GO:0010754; P:GO:0010821; P:GO:0030224; P:GO:0034404; P:GO:0035904; P:GO:0036006; P:GO:0040018; P:GO:0042308; P:GO:0042326; P:GO:0042542; P:GO:0043116; P:GO:0043117; P:GO:00…	P:negative regulation of transcription by RNA polymerase II; P:response to acid chemical; P:heart valve development; P:ventricular septum development; P:cAMP catabolic process; P:G protein-coupled receptor signaling pathway, coupled to cyclic nucleotide second messenger; P:adenylate cyclase-inhibiting G protein-coupled receptor signaling pathway; P:phototransduction; P:chemosensory behavior; P:de…	EC:3.1.4; EC:3.1.4.17; EC:3.1; EC:3.1.4.35; EC:3; EC:3.1.4.53; EC:7	Acting on ester bonds; 3',5'-cyclic-nucleotide phosphodiesterase; Acting on ester bonds; 3',5'-cyclic-GMP phosphodiesterase; Hydrolases; 3',5'-cyclic-AMP phosphodiesterase; Translocases
jg7761	1	690.514	9.60394e-65	A-kinase anchor protein SPHKAP isoform X1	4719	P:GO:0010738; F:GO:0051018; C:GO:0005739; C:GO:0030018	P:regulation of protein kinase A signaling; F:protein kinase A binding; C:mitochondrion; C:Z disc	NA	NA
jg7785	1	431.273	7.3011e-61	sodium channel subunit beta-2	690	P:GO:0007268; P:GO:0007399; P:GO:0046684; P:GO:0060371; P:GO:0086002; P:GO:0086012; P:GO:0086091; P:GO:2000649; F:GO:0017080; F:GO:0086006; C:GO:0001518	P:chemical synaptic transmission; P:nervous system development; P:response to pyrethroid; P:regulation of atrial cardiac muscle cell membrane depolarization; P:cardiac muscle cell action potential involved in contraction; P:membrane depolarization during cardiac muscle cell action potential; P:regulation of heart rate by cardiac conduction; P:regulation of sodium ion transmembrane transporter act…	EC:7	Translocases
jg7792	1	746.004	9.37495e-88	SLIT and NTRK-like protein 3	2622	P:GO:0007409; P:GO:0051965; P:GO:1905606; F:GO:0004104; C:GO:0005886; C:GO:0016021	P:axonogenesis; P:positive regulation of synapse assembly; P:regulation of presynapse assembly; F:cholinesterase activity; C:plasma membrane; C:integral component of membrane	EC:3.1; EC:3; EC:3.1.1.8; EC:3.1.1.1	Acting on ester bonds; Hydrolases; Cholinesterase; Carboxylesterase
jg7798	1	1094.54	3.40793e-59	neuroserpin	1251	P:GO:0007417; P:GO:0007422; P:GO:0010951; P:GO:0010976; P:GO:0030155; P:GO:0045666; P:GO:0050769; F:GO:0004867; C:GO:0005615; C:GO:0016021; C:GO:0034774; C:GO:0043025	P:central nervous system development; P:peripheral nervous system development; P:negative regulation of endopeptidase activity; P:positive regulation of neuron projection development; P:regulation of cell adhesion; P:positive regulation of neuron differentiation; P:positive regulation of neurogenesis; F:serine-type endopeptidase inhibitor activity; C:extracellular space; C:integral component of m…	NA	NA
jg7812	1	170.031	2.99248e-44	voltage-gated potassium channel subunit beta-1 isoform X3	1194	P:GO:0007420; P:GO:0007507; P:GO:0007519; P:GO:0007611; P:GO:0008152; P:GO:0034765; P:GO:0045445; P:GO:0045938; P:GO:0051259; P:GO:0060539; P:GO:0071805; P:GO:1902260; F:GO:0004033; F:GO:0005249; F:GO:0015459; F:GO:0019904; F:GO:0022839; F:GO:0044325; F:GO:0047834; F:GO:0070402; C:GO:0005737; C:GO:0005829; C:GO:0005886; C:GO:0008076; C:GO:0016021; C:GO:0031234; C:GO:0032839; C:GO:0043204; C:GO:00…	P:brain development; P:heart development; P:skeletal muscle tissue development; P:learning or memory; P:metabolic process; P:regulation of ion transmembrane transport; P:myoblast differentiation; P:positive regulation of circadian sleep/wake cycle, sleep; P:protein complex oligomerization; P:diaphragm development; P:potassium ion transmembrane transport; P:negative regulation of delayed rectifier…	EC:1.1; EC:1; EC:1.1.1; EC:1.1.1.122; EC:7	Acting on the CH-OH group of donors; Oxidoreductases; Acting on the CH-OH group of donors; D-threo-aldose 1-dehydrogenase; Translocases
jg7827	1	1263.62	9.05459e-139	Down syndrome cell adhesion molecule homolog isoform X1	6270	P:GO:0007156; P:GO:0007162; P:GO:0007416; P:GO:0007626; P:GO:0010770; P:GO:0010842; P:GO:0010976; P:GO:0042327; P:GO:0045666; P:GO:0048813; P:GO:0048842; P:GO:0060060; P:GO:0060219; P:GO:0070593; P:GO:1902669; C:GO:0005887; C:GO:0030426; C:GO:0045202	P:homophilic cell adhesion via plasma membrane adhesion molecules; P:negative regulation of cell adhesion; P:synapse assembly; P:locomotory behavior; P:positive regulation of cell morphogenesis involved in differentiation; P:retina layer formation; P:positive regulation of neuron projection development; P:positive regulation of phosphorylation; P:positive regulation of neuron differentiation; P:d…	NA	NA
jg7867	1	340.234	1.94878e-47	kin of IRRE-like protein 3 isoform X3	2493	P:GO:0001764; P:GO:0002121; P:GO:0007156; P:GO:0007157; P:GO:0007267; P:GO:0007416; P:GO:0007523; P:GO:0008039; P:GO:0010830; P:GO:0016202; P:GO:0021740; P:GO:0021766; P:GO:0022603; P:GO:0030097; P:GO:0036059; P:GO:0046667; P:GO:0048668; P:GO:0048755; P:GO:0051017; P:GO:0051704; P:GO:0061321; P:GO:0072102; P:GO:0097206; P:GO:1901739; P:GO:2000026; F:GO:0030165; F:GO:0050839; C:GO:0005576; C:GO:00…	P:neuron migration; P:inter-male aggressive behavior; P:homophilic cell adhesion via plasma membrane adhesion molecules; P:heterophilic cell-cell adhesion via plasma membrane cell adhesion molecules; P:cell-cell signaling; P:synapse assembly; P:larval visceral muscle development; P:synaptic target recognition; P:regulation of myotube differentiation; P:regulation of striated muscle tissue develop…	NA	NA
jg7875	1	178.078	3.71278e-73	G protein-activated inward rectifier potassium channel 4	774	P:GO:0034765; P:GO:0071805; P:GO:0086091; P:GO:0098914; P:GO:0098915; P:GO:1990573; F:GO:0015467; F:GO:0022839; F:GO:0086089; F:GO:1902282; C:GO:0008076; C:GO:0009897; C:GO:0016021; C:GO:0030315	P:regulation of ion transmembrane transport; P:potassium ion transmembrane transport; P:regulation of heart rate by cardiac conduction; P:membrane repolarization during atrial cardiac muscle cell action potential; P:membrane repolarization during ventricular cardiac muscle cell action potential; P:potassium ion import across plasma membrane; F:G-protein activated inward rectifier potassium channe…	EC:7	Translocases
jg7884	1	441.151	1.01422e-68	galactosylgalactosylxylosylprotein 3-beta-glucuronosyltransferase 1 isoform X1	1080	P:GO:0005975; P:GO:0006486; P:GO:0030204; P:GO:0043436; P:GO:0050650; F:GO:0008499; F:GO:0015018; F:GO:0046872; C:GO:0000139; C:GO:0005789; C:GO:0005796; C:GO:0016021; C:GO:0098791	P:carbohydrate metabolic process; P:protein glycosylation; P:chondroitin sulfate metabolic process; P:oxoacid metabolic process; P:chondroitin sulfate proteoglycan biosynthetic process; F:UDP-galactose:beta-N-acetylglucosamine beta-1,3-galactosyltransferase activity; F:galactosylgalactosylxylosylprotein 3-beta-glucuronosyltransferase activity; F:metal ion binding; C:Golgi membrane; C:endoplasmic …	EC:2.4; EC:2; EC:2.4.1.17; EC:2.4.1.135; EC:2.4.1	Glycosyltransferases; Transferases; Glucuronosyltransferase; Galactosylgalactosylxylosylprotein 3-beta-glucuronosyltransferase; Glycosyltransferases
jg7927	1	371.597	6.55648e-48	ankyrin repeat domain-containing protein 13B	1941	C:GO:0005769; C:GO:0005770; C:GO:0005886	C:early endosome; C:late endosome; C:plasma membrane	NA	NA
jg7953	1	855.226	3.04468e-37	beta-secretase 1	1578	P:GO:0006508; P:GO:0006509; P:GO:0007613; P:GO:0030163; P:GO:0044267; P:GO:0048167; P:GO:0050435; F:GO:0001540; F:GO:0004190; F:GO:0008238; F:GO:0008798; F:GO:0019899; C:GO:0005764; C:GO:0005769; C:GO:0005770; C:GO:0005771; C:GO:0005783; C:GO:0005788; C:GO:0005794; C:GO:0005802; C:GO:0005886; C:GO:0005887; C:GO:0009986; C:GO:0010008; C:GO:0016021; C:GO:0030424; C:GO:0030425; C:GO:0045121; C:GO:00…	P:proteolysis; P:membrane protein ectodomain proteolysis; P:memory; P:protein catabolic process; P:cellular protein metabolic process; P:regulation of synaptic plasticity; P:amyloid-beta metabolic process; F:amyloid-beta binding; F:aspartic-type endopeptidase activity; F:exopeptidase activity; F:beta-aspartyl-peptidase activity; F:enzyme binding; C:lysosome; C:early endosome; C:late endosome; C:m…	EC:3.4.23; EC:3.4.19.5; EC:3.4; EC:3; EC:3.4.19; EC:3.4.23.46; EC:3.4.23.45	Acting on peptide bonds (peptidases); Beta-aspartyl-peptidase; Acting on peptide bonds (peptidases); Hydrolases; Acting on peptide bonds (peptidases); Memapsin 2; Memapsin 1
jg7997	1	1417.64	1.73791e-42	integral membrane protein 2Ca	786	P:GO:0010977; P:GO:0042985; P:GO:0045665; P:GO:0050768; P:GO:2001238; F:GO:0001540; F:GO:0005524; C:GO:0005764; C:GO:0005794; C:GO:0005886; C:GO:0016021; C:GO:0048471; C:GO:0070062	P:negative regulation of neuron projection development; P:negative regulation of amyloid precursor protein biosynthetic process; P:negative regulation of neuron differentiation; P:negative regulation of neurogenesis; P:positive regulation of extrinsic apoptotic signaling pathway; F:amyloid-beta binding; F:ATP binding; C:lysosome; C:Golgi apparatus; C:plasma membrane; C:integral component of membr…	NA	NA
jg8015	1	389.809	3.80896e-63	calsyntenin-2-like	2700	P:GO:0007156; P:GO:0008355; P:GO:0016339; P:GO:0034613; P:GO:0044331; P:GO:0050806; P:GO:0051965; F:GO:0005158; F:GO:0005509; C:GO:0000139; C:GO:0005615; C:GO:0005789; C:GO:0005887; C:GO:0009986; C:GO:0014069; C:GO:0016021; C:GO:0030424; C:GO:0032809; C:GO:0042995; C:GO:0045202; C:GO:0045211; C:GO:0098791	P:homophilic cell adhesion via plasma membrane adhesion molecules; P:olfactory learning; P:calcium-dependent cell-cell adhesion via plasma membrane cell adhesion molecules; P:cellular protein localization; P:cell-cell adhesion mediated by cadherin; P:positive regulation of synaptic transmission; P:positive regulation of synapse assembly; F:insulin receptor binding; F:calcium ion binding; C:Golgi …	NA	NA
jg8036	1	195.143	1.74338e-32	E3 ubiquitin-protein ligase rnf152-B-like	771	F:GO:0046872; C:GO:0016021	F:metal ion binding; C:integral component of membrane	NA	NA
jg8049	1	343.325	1.77452e-22	zinc finger and BTB domain-containing protein 44 isoform X2	1413	P:GO:0006357; F:GO:0000981	P:regulation of transcription by RNA polymerase II; F:DNA-binding transcription factor activity, RNA polymerase II-specific	NA	NA
jg8138	1	1527.72	9.08825e-48	secretogranin-2	2061	P:GO:0000165; P:GO:0001525; P:GO:0001937; P:GO:0001938; P:GO:0002790; P:GO:0006468; P:GO:0006954; P:GO:0009306; P:GO:0010469; P:GO:0043542; P:GO:0043687; P:GO:0048245; P:GO:0050930; P:GO:2000352; P:GO:2001237; F:GO:0005125; F:GO:0042056; C:GO:0005576; C:GO:0005615; C:GO:0005788; C:GO:0030141; C:GO:0098992	P:MAPK cascade; P:angiogenesis; P:negative regulation of endothelial cell proliferation; P:positive regulation of endothelial cell proliferation; P:peptide secretion; P:protein phosphorylation; P:inflammatory response; P:protein secretion; P:regulation of signaling receptor activity; P:endothelial cell migration; P:post-translational protein modification; P:eosinophil chemotaxis; P:induction of p…	NA	NA
jg8148	1	850.894	5.71231e-71	CAP-Gly domain-containing linker protein 3 isoform X1	1965	P:GO:0001934; P:GO:0010803; P:GO:0010828; P:GO:0015031; P:GO:0015833; P:GO:0018230; P:GO:0031115; P:GO:0043065; P:GO:0044091; P:GO:0045444; P:GO:0045807; P:GO:1903078; F:GO:0008017; F:GO:0035594; C:GO:0000139; C:GO:0005829; C:GO:0005886; C:GO:0031901; C:GO:0032588; C:GO:0045121; C:GO:0055038	P:positive regulation of protein phosphorylation; P:regulation of tumor necrosis factor-mediated signaling pathway; P:positive regulation of glucose transmembrane transport; P:protein transport; P:peptide transport; P:peptidyl-L-cysteine S-palmitoylation; P:negative regulation of microtubule polymerization; P:positive regulation of apoptotic process; P:membrane biogenesis; P:fat cell differentiat…	NA	NA
jg8221	1	267.556	5.16374e-52	segment polarity protein dishevelled homolog DVL-3-like	1953	P:GO:0000132; P:GO:0001714; P:GO:0001737; P:GO:0002066; P:GO:0003148; P:GO:0007298; P:GO:0007346; P:GO:0007367; P:GO:0007391; P:GO:0007435; P:GO:0008045; P:GO:0008356; P:GO:0008585; P:GO:0008587; P:GO:0010628; P:GO:0010770; P:GO:0010976; P:GO:0016201; P:GO:0016348; P:GO:0021953; P:GO:0031290; P:GO:0032053; P:GO:0032231; P:GO:0032880; P:GO:0035019; P:GO:0035159; P:GO:0035262; P:GO:0035309; P:GO:00…	P:establishment of mitotic spindle orientation; P:endodermal cell fate specification; P:establishment of imaginal disc-derived wing hair orientation; P:columnar/cuboidal epithelial cell development; P:outflow tract septum morphogenesis; P:border follicle cell migration; P:regulation of mitotic cell cycle; P:segment polarity determination; P:dorsal closure; P:salivary gland morphogenesis; P:motor …	NA	NA
jg8241	1	401.322	1.92022e-73	neuronal tyrosine-phosphorylated phosphoinositide-3-kinase adapter 2 isoform X2	1086	P:GO:0014065; P:GO:0016310; P:GO:0048812; F:GO:0016301	P:phosphatidylinositol 3-kinase signaling; P:phosphorylation; P:neuron projection morphogenesis; F:kinase activity	EC:2.7; EC:2	Transferring phosphorus-containing groups; Transferases
jg14915	1	518.966	7.99051e-13	plexin A3	4461	P:GO:0010771; P:GO:0021612; P:GO:0021637; P:GO:0021766; P:GO:0021785; P:GO:0021860; P:GO:0045665; P:GO:0048696; P:GO:0048755; P:GO:0048843; P:GO:0050919; P:GO:0051495; P:GO:0060272; P:GO:0071526; P:GO:1902287; P:GO:1902668; F:GO:0017154; F:GO:0042803; C:GO:0002116; C:GO:0005634; C:GO:0005886; C:GO:0016021; C:GO:0030054	P:negative regulation of cell morphogenesis involved in differentiation; P:facial nerve structural organization; P:trigeminal nerve structural organization; P:hippocampus development; P:branchiomotor neuron axon guidance; P:pyramidal neuron development; P:negative regulation of neuron differentiation; P:regulation of collateral sprouting in absence of injury; P:branching morphogenesis of a nerve;…	NA	NA
jg14938	1	407.074	4.34867e-16	FYVE, RhoGEF and PH domain-containing protein 1 isoform X1	3069	P:GO:0007186; P:GO:0008360; P:GO:0009887; P:GO:0030036; P:GO:0043065; P:GO:0043087; P:GO:0046847; P:GO:0050790; P:GO:0051056; P:GO:0051128; F:GO:0005085; F:GO:0031267; F:GO:0046872; C:GO:0001726; C:GO:0005737; C:GO:0005794; C:GO:0005829; C:GO:0005856; C:GO:0030027	P:G protein-coupled receptor signaling pathway; P:regulation of cell shape; P:animal organ morphogenesis; P:actin cytoskeleton organization; P:positive regulation of apoptotic process; P:regulation of GTPase activity; P:filopodium assembly; P:regulation of catalytic activity; P:regulation of small GTPase mediated signal transduction; P:regulation of cellular component organization; F:guanyl-nucle…	NA	NA
jg14945	1	1804.19	4.24521e-73	proprotein convertase subtilisin/kexin type 1 inhibitor, like	1986	P:GO:0010951; F:GO:0004866	P:negative regulation of endopeptidase activity; F:endopeptidase inhibitor activity	NA	NA
jg14950	1	363.997	1.60612e-65	FERM domain-containing protein 4B	1845	P:GO:0008104; P:GO:0034454; C:GO:0005737; C:GO:0005814; C:GO:0120103	P:protein localization; P:microtubule anchoring at centrosome; C:cytoplasm; C:centriole; C:centriolar subdistal appendage	NA	NA
jg14970	1	2162.85	5.98391e-87	V-type proton ATPase subunit S1	348	P:GO:0001934; P:GO:0006879; P:GO:0007568; P:GO:0008219; P:GO:0008286; P:GO:0015833; P:GO:0015988; P:GO:0033572; P:GO:0036295; P:GO:0045669; P:GO:0045778; P:GO:0045780; P:GO:0045851; P:GO:0045921; P:GO:0046852; P:GO:0051656; P:GO:0070374; P:GO:1902600; P:GO:1903012; P:GO:2001206; F:GO:0005215; F:GO:0031267; C:GO:0010008; C:GO:0016021; C:GO:0033180; C:GO:0033181	P:positive regulation of protein phosphorylation; P:cellular iron ion homeostasis; P:aging; P:cell death; P:insulin receptor signaling pathway; P:peptide transport; P:energy coupled proton transmembrane transport, against electrochemical gradient; P:transferrin transport; P:cellular response to increased oxygen levels; P:positive regulation of osteoblast differentiation; P:positive regulation of …	EC:7	Translocases
jg14986	1	1254.05	3.21962e-14	neural cell adhesion molecule L1.1-like isoform X2	3867	P:GO:0000132; P:GO:0001932; P:GO:0003384; P:GO:0007156; P:GO:0007157; P:GO:0007158; P:GO:0007159; P:GO:0007160; P:GO:0007173; P:GO:0007413; P:GO:0007560; P:GO:0008045; P:GO:0008049; P:GO:0008050; P:GO:0008366; P:GO:0009792; P:GO:0010628; P:GO:0010811; P:GO:0014823; P:GO:0016319; P:GO:0019991; P:GO:0021682; P:GO:0022409; P:GO:0031103; P:GO:0033563; P:GO:0033564; P:GO:0033631; P:GO:0034109; P:GO:00…	P:establishment of mitotic spindle orientation; P:regulation of protein phosphorylation; P:apical constriction involved in gastrulation; P:homophilic cell adhesion via plasma membrane adhesion molecules; P:heterophilic cell-cell adhesion via plasma membrane cell adhesion molecules; P:neuron cell-cell adhesion; P:leukocyte cell-cell adhesion; P:cell-matrix adhesion; P:epidermal growth factor recep…	NA	NA
jg14991	1	283.757	1.94383e-70	PDZ domain-containing protein 4-like	3303	C:GO:0005654; C:GO:0005730; C:GO:0005739	C:nucleoplasm; C:nucleolus; C:mitochondrion	EC:2.3.2.27	RING-type E3 ubiquitin transferase
jg15058	1	151.19	4.89092e-53	ganglioside-induced differentiation-associated protein 1-like 1	1101	P:GO:0006749; F:GO:0004364; C:GO:0005737; C:GO:0016021	P:glutathione metabolic process; F:glutathione transferase activity; C:cytoplasm; C:integral component of membrane	EC:2.5.1; EC:2.5.1.18; EC:2	Transferring alkyl or aryl groups, other than methyl groups; Glutathione transferase; Transferases
jg15073	1	331.35	2.69674e-61	E3 ubiquitin-protein ligase MARCHF9	1014	F:GO:0008270; C:GO:0005795; C:GO:0005802; C:GO:0016021	F:zinc ion binding; C:Golgi stack; C:trans-Golgi network; C:integral component of membrane	EC:2.3.2.27	RING-type E3 ubiquitin transferase
jg15076	1	1177.96	2.85087e-54	arf-GAP with GTPase, ANK repeat and PH domain-containing protein 2 isoform X1	3540	P:GO:0010513; P:GO:0010628; P:GO:0014068; P:GO:0016197; P:GO:0030036; P:GO:0032147; P:GO:0033601; P:GO:0036445; P:GO:0042177; P:GO:0043524; P:GO:0045944; P:GO:0046427; P:GO:0048259; P:GO:0050790; P:GO:0055059; P:GO:0060582; P:GO:0060749; P:GO:0061903; P:GO:0072089; P:GO:0072375; P:GO:0090630; P:GO:0098722; P:GO:2000026; P:GO:2001240; F:GO:0003924; F:GO:0005096; F:GO:0005524; F:GO:0005525; F:GO:00…	P:positive regulation of phosphatidylinositol biosynthetic process; P:positive regulation of gene expression; P:positive regulation of phosphatidylinositol 3-kinase signaling; P:endosomal transport; P:actin cytoskeleton organization; P:activation of protein kinase activity; P:positive regulation of mammary gland epithelial cell proliferation; P:neuronal stem cell division; P:negative regulation o…	EC:3.6.1; EC:3.6; EC:3	Acting on acid anhydrides; Acting on acid anhydrides; Hydrolases
jg15094	1	3873.16	2.79471e-34	rab GDP dissociation inhibitor alpha	1344	P:GO:0007264; P:GO:0010770; P:GO:0010771; P:GO:0010976; P:GO:0015031; P:GO:0032482; P:GO:0045665; P:GO:0045666; P:GO:0045773; P:GO:0050771; P:GO:0050790; P:GO:0051056; P:GO:0051592; P:GO:0090087; P:GO:0090315; F:GO:0005093; F:GO:0005096; F:GO:0031267; C:GO:0005737; C:GO:0005829; C:GO:0030424; C:GO:0030496; C:GO:0032991; C:GO:0043025; C:GO:0043209	P:small GTPase mediated signal transduction; P:positive regulation of cell morphogenesis involved in differentiation; P:negative regulation of cell morphogenesis involved in differentiation; P:positive regulation of neuron projection development; P:protein transport; P:Rab protein signal transduction; P:negative regulation of neuron differentiation; P:positive regulation of neuron differentiation…	NA	NA
jg15107	1	662.706	1.63685e-107	teashirt homolog 2	3081	P:GO:0000122; P:GO:0003156; P:GO:0007380; P:GO:0007384; P:GO:0007450; P:GO:0007473; P:GO:0007476; P:GO:0007479; P:GO:0007480; P:GO:0007494; P:GO:0008258; P:GO:0010468; P:GO:0010628; P:GO:0010629; P:GO:0016055; P:GO:0035214; P:GO:0045705; P:GO:0045944; P:GO:0048701; P:GO:0048730; P:GO:0051094; P:GO:0051240; P:GO:0061330; P:GO:2000026; P:GO:2000497; F:GO:0001227; F:GO:0003677; F:GO:0003682; F:GO:00…	P:negative regulation of transcription by RNA polymerase II; P:regulation of animal organ formation; P:specification of segmental identity, head; P:specification of segmental identity, thorax; P:dorsal/ventral pattern formation, imaginal disc; P:wing disc proximal/distal pattern formation; P:imaginal disc-derived wing morphogenesis; P:leg disc proximal/distal pattern formation; P:imaginal disc-de…	NA	NA
jg15132	1	736.921	4.2028e-70	homeodomain-interacting protein kinase 1 isoform X2	3303	P:GO:0000045; P:GO:0000122; P:GO:0006468; P:GO:0006979; P:GO:0008284; P:GO:0008340; P:GO:0008586; P:GO:0008587; P:GO:0009408; P:GO:0009952; P:GO:0010628; P:GO:0010629; P:GO:0010803; P:GO:0010842; P:GO:0030182; P:GO:0034333; P:GO:0035331; P:GO:0042332; P:GO:0042771; P:GO:0043067; P:GO:0043388; P:GO:0045747; P:GO:0045766; P:GO:0045880; P:GO:0046622; P:GO:0048596; P:GO:0048749; P:GO:0050821; P:GO:00…	P:autophagosome assembly; P:negative regulation of transcription by RNA polymerase II; P:protein phosphorylation; P:response to oxidative stress; P:positive regulation of cell population proliferation; P:determination of adult lifespan; P:imaginal disc-derived wing vein morphogenesis; P:imaginal disc-derived wing margin morphogenesis; P:response to heat; P:anterior/posterior pattern specification…	EC:2.7.1; EC:2.7.11.1; EC:2.7; EC:2	Transferring phosphorus-containing groups; Non-specific serine/threonine protein kinase; Transferring phosphorus-containing groups; Transferases
jg15153	1	839.966	0.000129004	membrane-associated guanylate kinase, WW and PDZ domain-containing protein 3a isoform X3	3471	P:GO:0006915; P:GO:0007616; P:GO:0032880; P:GO:0043507; P:GO:0046037; P:GO:0046328; P:GO:0046330; P:GO:0046710; P:GO:0046940; P:GO:0046959; P:GO:1901068; F:GO:0004385; F:GO:0005109; F:GO:0008013; F:GO:0035254; F:GO:0060090; C:GO:0005634; C:GO:0005886; C:GO:0005912; C:GO:0005923; C:GO:0045202	P:apoptotic process; P:long-term memory; P:regulation of protein localization; P:positive regulation of JUN kinase activity; P:GMP metabolic process; P:regulation of JNK cascade; P:positive regulation of JNK cascade; P:GDP metabolic process; P:nucleoside monophosphate phosphorylation; P:habituation; P:guanosine-containing compound metabolic process; F:guanylate kinase activity; F:frizzled binding…	EC:2.7.4.4; EC:2.7.4.8; EC:2.7; EC:2; EC:2.7.4	Nucleoside-phosphate kinase; Guanylate kinase; Transferring phosphorus-containing groups; Transferases; Transferring phosphorus-containing groups
jg15163	1	966.215	2.22229e-21	plexin-A2 isoform X1	5706	P:GO:0001756; P:GO:0010769; P:GO:0021785; P:GO:0021915; P:GO:0021935; P:GO:0030334; P:GO:0045664; P:GO:0048841; P:GO:0050767; P:GO:0050770; P:GO:0051640; P:GO:0051642; P:GO:0060037; P:GO:0060174; P:GO:0071526; P:GO:1902667; F:GO:0017154; F:GO:0042802; C:GO:0002116; C:GO:0005887	P:somitogenesis; P:regulation of cell morphogenesis involved in differentiation; P:branchiomotor neuron axon guidance; P:neural tube development; P:cerebellar granule cell precursor tangential migration; P:regulation of cell migration; P:regulation of neuron differentiation; P:regulation of axon extension involved in axon guidance; P:regulation of neurogenesis; P:regulation of axonogenesis; P:org…	NA	NA
jg15172	1	370.167	3.95096e-08	heme transporter hrg1-B	435	P:GO:0015886; P:GO:0055085; F:GO:0015232; F:GO:0020037; C:GO:0005765; C:GO:0005886; C:GO:0010008; C:GO:0016021	P:heme transport; P:transmembrane transport; F:heme transmembrane transporter activity; F:heme binding; C:lysosomal membrane; C:plasma membrane; C:endosome membrane; C:integral component of membrane	EC:7	Translocases
jg15183	1	356.427	9.68924e-57	inactive dipeptidyl peptidase 10	2370	P:GO:0006508; F:GO:0004177; F:GO:0008236; F:GO:0008239; C:GO:0016021	P:proteolysis; F:aminopeptidase activity; F:serine-type peptidase activity; F:dipeptidyl-peptidase activity; C:integral component of membrane	EC:3.4.11; EC:3.4; EC:3.4.14.1; EC:3; EC:3.4.14.5; EC:3.4.14.4; EC:3.4.14.2	Acting on peptide bonds (peptidases); Acting on peptide bonds (peptidases); Dipeptidyl-peptidase I; Hydrolases; Dipeptidyl-peptidase IV; Dipeptidyl-peptidase III; Dipeptidyl-peptidase II
jg15211	1	622.016	5.79637e-71	transcriptional repressor scratch 2	960	P:GO:0000122; P:GO:0010629; P:GO:0043516; P:GO:0043523; P:GO:0050767; P:GO:1902042; P:GO:2000177; P:GO:2001222; F:GO:0000977; F:GO:0001227; F:GO:0005515; C:GO:0000228; C:GO:0000785; C:GO:0016604	P:negative regulation of transcription by RNA polymerase II; P:negative regulation of gene expression; P:regulation of DNA damage response, signal transduction by p53 class mediator; P:regulation of neuron apoptotic process; P:regulation of neurogenesis; P:negative regulation of extrinsic apoptotic signaling pathway via death domain receptors; P:regulation of neural precursor cell proliferation; …	NA	NA
jg15223	1	180.869	8.77562e-37	XK-related protein 7	1692	C:GO:0016021	C:integral component of membrane	NA	NA
jg15235	1	770.023	3.90109e-94	dnaJ (Hsp40) homolog, subfamily C, member 5aa	600	P:GO:0006457; P:GO:0016079; P:GO:0017156; P:GO:0043312; P:GO:0043524; P:GO:0046907; P:GO:0048489; P:GO:0070050; P:GO:0097480; P:GO:1900073; P:GO:1903035; F:GO:0043008; C:GO:0005886; C:GO:0008021; C:GO:0035577; C:GO:0035579; C:GO:0061176; C:GO:0061177; C:GO:0061202	P:protein folding; P:synaptic vesicle exocytosis; P:calcium-ion regulated exocytosis; P:neutrophil degranulation; P:negative regulation of neuron apoptotic process; P:intracellular transport; P:synaptic vesicle transport; P:neuron cellular homeostasis; P:establishment of synaptic vesicle localization; P:regulation of neuromuscular synaptic transmission; P:negative regulation of response to woundi…	NA	NA
jg15241	1	413.146	4.80729e-76	basic salivary proline-rich protein 4 isoform X1	1413	P:GO:0035556; P:GO:0050852; P:GO:0050853; P:GO:0050868; C:GO:0005886; C:GO:0016021; C:GO:0045121	P:intracellular signal transduction; P:T cell receptor signaling pathway; P:B cell receptor signaling pathway; P:negative regulation of T cell activation; C:plasma membrane; C:integral component of membrane; C:membrane raft	NA	NA
jg15256	1	2654.41	1.45828e-128	synaptophysin b	882	C:GO:0008021; C:GO:0016021	C:synaptic vesicle; C:integral component of membrane	NA	NA
jg15262	1	333.263	4.38647e-39	membrane-associated guanylate kinase, WW and PDZ domain-containing protein 2 isoform X1	4482	P:GO:0016310; F:GO:0016301; C:GO:0016020; C:GO:0030054	P:phosphorylation; F:kinase activity; C:membrane; C:cell junction	EC:2.7; EC:2	Transferring phosphorus-containing groups; Transferases
jg15264	1	422.532	4.92783e-121	PDZ domain-containing protein 4-like isoform X1	2805	C:GO:0005654; C:GO:0005730; C:GO:0005739	C:nucleoplasm; C:nucleolus; C:mitochondrion	EC:2.3.2.27	RING-type E3 ubiquitin transferase
jg15268	1	288.057	1.49339e-58	probable G-protein coupled receptor 173	1212	P:GO:0007186; F:GO:0004930; C:GO:0016021	P:G protein-coupled receptor signaling pathway; F:G protein-coupled receptor activity; C:integral component of membrane	NA	NA
jg15285	1	587.646	7.83026e-94	calmodulin-binding transcription activator 1 isoform X5	5454	P:GO:0006357; F:GO:0003677	P:regulation of transcription by RNA polymerase II; F:DNA binding	NA	NA
jg15316	1	991.232	5.42426e-36	FERM domain-containing protein 4B isoform X2	2931	P:GO:0051493; P:GO:0090162; P:GO:1903729; C:GO:0001726; C:GO:0005737; C:GO:0005813; C:GO:0005856; C:GO:0005912; C:GO:0005923; C:GO:0032154	P:regulation of cytoskeleton organization; P:establishment of epithelial cell polarity; P:regulation of plasma membrane organization; C:ruffle; C:cytoplasm; C:centrosome; C:cytoskeleton; C:adherens junction; C:bicellular tight junction; C:cleavage furrow	NA	NA
jg15326	1	1077.56	9.31872e-53	synaptotagmin-2-like isoform X1	1290	P:GO:0007317; P:GO:0008345; P:GO:0010940; P:GO:0010976; P:GO:0017158; P:GO:0030421; P:GO:0031340; P:GO:0043051; P:GO:0044087; P:GO:0045666; P:GO:0045995; P:GO:0046907; P:GO:0046928; P:GO:0048488; P:GO:0048489; P:GO:0048791; P:GO:0050769; P:GO:0050803; P:GO:0060024; P:GO:0060281; P:GO:0097480; P:GO:0098657; P:GO:1900073; P:GO:1902875; P:GO:1903429; P:GO:1903861; F:GO:0001786; F:GO:0005509; F:GO:00…	P:regulation of pole plasm oskar mRNA localization; P:larval locomotory behavior; P:positive regulation of necrotic cell death; P:positive regulation of neuron projection development; P:regulation of calcium ion-dependent exocytosis; P:defecation; P:positive regulation of vesicle fusion; P:regulation of pharyngeal pumping; P:regulation of cellular component biogenesis; P:positive regulation of ne…	NA	NA
jg15337	1	1552.54	5.01828e-97	protein kinase C and casein kinase substrate in neurons protein 1	1323	P:GO:0007015; P:GO:0016310; P:GO:0048666; P:GO:0097320; F:GO:0016301; C:GO:0005829; C:GO:0030659; C:GO:0032587; C:GO:0043005; C:GO:0045202	P:actin filament organization; P:phosphorylation; P:neuron development; P:plasma membrane tubulation; F:kinase activity; C:cytosol; C:cytoplasmic vesicle membrane; C:ruffle membrane; C:neuron projection; C:synapse	EC:2.7; EC:2	Transferring phosphorus-containing groups; Transferases
jg15353	1	429.389	1.13518e-86	mitogen-activated protein kinase kinase kinase 12	2874	P:GO:0006325; P:GO:0007030; P:GO:0007254; P:GO:0007283; P:GO:0007616; P:GO:0010770; P:GO:0016572; P:GO:0018105; P:GO:0018107; P:GO:0032147; P:GO:0043406; P:GO:0045666; P:GO:0046777; P:GO:0048674; P:GO:0048689; P:GO:0048691; P:GO:0048841; P:GO:0072375; P:GO:1902667; P:GO:1905868; P:GO:2000331; P:GO:2000672; F:GO:0004709; F:GO:0005524; F:GO:0008022; F:GO:0019901; F:GO:0031625; F:GO:0042803; F:GO:01…	P:chromatin organization; P:Golgi organization; P:JNK cascade; P:spermatogenesis; P:long-term memory; P:positive regulation of cell morphogenesis involved in differentiation; P:histone phosphorylation; P:peptidyl-serine phosphorylation; P:peptidyl-threonine phosphorylation; P:activation of protein kinase activity; P:positive regulation of MAP kinase activity; P:positive regulation of neuron diffe…	EC:2.7.11.25; EC:2.7.1; EC:2.7; EC:2	Mitogen-activated protein kinase kinase kinase; Transferring phosphorus-containing groups; Transferring phosphorus-containing groups; Transferases
jg15364	1	810.853	9.83161e-40	adenylate cyclase type 6-like	3630	P:GO:0003091; P:GO:0006171; P:GO:0006182; P:GO:0007187; P:GO:0007189; P:GO:0007193; P:GO:0007212; P:GO:0007623; P:GO:0010977; P:GO:0019933; P:GO:0022011; P:GO:0035556; P:GO:0035811; P:GO:0045665; P:GO:0050768; P:GO:0060282; P:GO:0061478; P:GO:0071229; P:GO:0071236; P:GO:0071377; P:GO:0071380; P:GO:0071398; P:GO:0071466; P:GO:0072660; P:GO:0097746; P:GO:1900195; P:GO:1904117; P:GO:1904322; P:GO:19…	P:renal water homeostasis; P:cAMP biosynthetic process; P:cGMP biosynthetic process; P:G protein-coupled receptor signaling pathway, coupled to cyclic nucleotide second messenger; P:adenylate cyclase-activating G protein-coupled receptor signaling pathway; P:adenylate cyclase-inhibiting G protein-coupled receptor signaling pathway; P:dopamine receptor signaling pathway; P:circadian rhythm; P:nega…	EC:4; EC:4.6; EC:4.6.1.1; EC:4.6.1.2	Lyases; Phosphorus-oxygen lyases; Adenylate cyclase; Guanylate cyclase
jg15366	1	280.99	3.35095e-38	voltage-dependent L-type calcium channel subunit beta-4-like isoform X2	1188	P:GO:0070588; F:GO:0005245; C:GO:0005891	P:calcium ion transmembrane transport; F:voltage-gated calcium channel activity; C:voltage-gated calcium channel complex	EC:7	Translocases
jg15376	1	964.969	6.64241e-23	nuclear receptor coactivator 3-like	4605	P:GO:0006325; P:GO:0008584; P:GO:0010628; P:GO:0016573; P:GO:0030307; P:GO:0030521; P:GO:0033148; P:GO:0035264; P:GO:0035624; P:GO:0043066; P:GO:0043697; P:GO:0045618; P:GO:0045893; P:GO:0045944; P:GO:0051091; P:GO:0060068; P:GO:0060713; P:GO:0060744; P:GO:0071392; P:GO:0072091; P:GO:1902459; P:GO:2000035; P:GO:2000737; F:GO:0000977; F:GO:0000993; F:GO:0001228; F:GO:0003682; F:GO:0004402; F:GO:00…	P:chromatin organization; P:male gonad development; P:positive regulation of gene expression; P:histone acetylation; P:positive regulation of cell growth; P:androgen receptor signaling pathway; P:positive regulation of intracellular estrogen receptor signaling pathway; P:multicellular organism growth; P:receptor transactivation; P:negative regulation of apoptotic process; P:cell dedifferentiation…	EC:2.3; EC:2; EC:2.3.1.48; EC:2.3.1	Acyltransferases; Transferases; Histone acetyltransferase; Acyltransferases
jg15400	1	171.556	5.81976e-96	calcium-responsive transactivator-like isoform X1	1251	P:GO:0010628; P:GO:0045666; P:GO:0045893; P:GO:0050775; P:GO:1900006; F:GO:0003677; F:GO:0003700; F:GO:0003713; C:GO:0000776; C:GO:0000794; C:GO:0005829; C:GO:0016604; C:GO:0071565	P:positive regulation of gene expression; P:positive regulation of neuron differentiation; P:positive regulation of transcription, DNA-templated; P:positive regulation of dendrite morphogenesis; P:positive regulation of dendrite development; F:DNA binding; F:DNA-binding transcription factor activity; F:transcription coactivator activity; C:kinetochore; C:condensed nuclear chromosome; C:cytosol; C…	NA	NA
jg15414	1	3261.25	6.33988e-233	sodium- and chloride-dependent GABA transporter 1a	2133	P:GO:0003333; P:GO:0006836; P:GO:0007268; P:GO:0015718; P:GO:0015812; P:GO:0035725; P:GO:0055085; P:GO:0071260; P:GO:0098656; F:GO:0005328; F:GO:0005332; C:GO:0005887; C:GO:0043005; C:GO:0043025; C:GO:0097386	P:amino acid transmembrane transport; P:neurotransmitter transport; P:chemical synaptic transmission; P:monocarboxylic acid transport; P:gamma-aminobutyric acid transport; P:sodium ion transmembrane transport; P:transmembrane transport; P:cellular response to mechanical stimulus; P:anion transmembrane transport; F:neurotransmitter:sodium symporter activity; F:gamma-aminobutyric acid:sodium sympor…	EC:7	Translocases
jg15416	1	854.728	3.66023e-57	synapsin-2a isoform X1	1662	P:GO:0007269; P:GO:0046928; P:GO:0060341; F:GO:0005524; F:GO:0008092; F:GO:0046983; F:GO:0048306; C:GO:0005886; C:GO:0008021; C:GO:0014069; C:GO:0030672; C:GO:0031201; C:GO:0043195; C:GO:0043209	P:neurotransmitter secretion; P:regulation of neurotransmitter secretion; P:regulation of cellular localization; F:ATP binding; F:cytoskeletal protein binding; F:protein dimerization activity; F:calcium-dependent protein binding; C:plasma membrane; C:synaptic vesicle; C:postsynaptic density; C:synaptic vesicle membrane; C:SNARE complex; C:terminal bouton; C:myelin sheath	NA	NA
jg15422	1	2091.68	6.43341e-42	IQ motif and SEC7 domain-containing protein 1-like isoform X7	3393	NA	NA	NA	NA
jg15437	1	912.411	1.09393e-11	serine/threonine-protein kinase WNK2-like isoform X1	8391	P:GO:0001933; P:GO:0006468; P:GO:0007411; P:GO:0008285; P:GO:0035220; P:GO:0046777; P:GO:0050801; P:GO:0070373; P:GO:0090263; P:GO:1903288; P:GO:2000651; F:GO:0004674; F:GO:0005524; F:GO:0106310; C:GO:0005829	P:negative regulation of protein phosphorylation; P:protein phosphorylation; P:axon guidance; P:negative regulation of cell population proliferation; P:wing disc development; P:protein autophosphorylation; P:ion homeostasis; P:negative regulation of ERK1 and ERK2 cascade; P:positive regulation of canonical Wnt signaling pathway; P:positive regulation of potassium ion import across plasma membrane…	EC:2.7.1; EC:2.7.11.1; EC:2.7; EC:2	Transferring phosphorus-containing groups; Non-specific serine/threonine protein kinase; Transferring phosphorus-containing groups; Transferases
jg15469	1	879.47	3.57904e-46	proline-rich transmembrane protein 3	3144	C:GO:0016021	C:integral component of membrane	NA	NA
jg15508	1	918.072	5.81365e-71	dedicator of cytokinesis protein 3-like isoform X3	6240	P:GO:0000132; P:GO:0007369; P:GO:0007417; P:GO:0045466; P:GO:0070986; P:GO:0090630; P:GO:0098657; P:GO:1901076; P:GO:1902742; P:GO:1903356; P:GO:1903997; F:GO:0005085; F:GO:0017124; F:GO:0031267; C:GO:0005829; C:GO:0005886; C:GO:0032045	P:establishment of mitotic spindle orientation; P:gastrulation; P:central nervous system development; P:R7 cell differentiation; P:left/right axis specification; P:activation of GTPase activity; P:import into cell; P:positive regulation of engulfment of apoptotic cell; P:apoptotic process involved in development; P:positive regulation of distal tip cell migration; P:positive regulation of non-mem…	NA	NA
jg15509	1	353.991	1.41434e-05	poly(rC)-binding protein 4-like	1341	P:GO:0006977; P:GO:0043488; P:GO:0048025; P:GO:0090068; P:GO:1902163; F:GO:0003723; F:GO:0003730; C:GO:0005634; C:GO:0005829	P:DNA damage response, signal transduction by p53 class mediator resulting in cell cycle arrest; P:regulation of mRNA stability; P:negative regulation of mRNA splicing, via spliceosome; P:positive regulation of cell cycle process; P:negative regulation of DNA damage response, signal transduction by p53 class mediator resulting in transcription of p21 class mediator; F:RNA binding; F:mRNA 3'-UTR b…	NA	NA
jg15514	1	438.294	4.13287e-36	metabotropic glutamate receptor 7-like	2730	P:GO:0001661; P:GO:0001662; P:GO:0007186; P:GO:0007187; P:GO:0007196; P:GO:0007605; P:GO:0007614; P:GO:0010884; P:GO:0014050; P:GO:0019226; P:GO:0030534; P:GO:0031279; P:GO:0043524; P:GO:0051966; P:GO:0065008; P:GO:0070588; F:GO:0001642; F:GO:0004930; F:GO:0005245; F:GO:0005246; F:GO:0005509; F:GO:0005516; F:GO:0010855; F:GO:0016595; F:GO:0022839; F:GO:0030165; F:GO:0042803; F:GO:0048306; F:GO:00…	P:conditioned taste aversion; P:behavioral fear response; P:G protein-coupled receptor signaling pathway; P:G protein-coupled receptor signaling pathway, coupled to cyclic nucleotide second messenger; P:adenylate cyclase-inhibiting G protein-coupled glutamate receptor signaling pathway; P:sensory perception of sound; P:short-term memory; P:positive regulation of lipid storage; P:negative regulati…	EC:7	Translocases
jg15548	1	331.593	1.3078e-20	spermatogenesis-associated protein 2	1704	P:GO:0007283; F:GO:0020037; C:GO:0001650; C:GO:0005737	P:spermatogenesis; F:heme binding; C:fibrillar center; C:cytoplasm	NA	NA
jg15590	1	629.947	1.81559e-47	cyclin-dependent kinase 16-like isoform X3	1470	NA	NA	EC:2.7.11.22	Cyclin-dependent kinase
jg15594	1	268.662	7.70901e-46	potassium voltage-gated channel subfamily D member 3 isoform X1	1863	P:GO:0007268; P:GO:0008306; P:GO:0034765; P:GO:0051260; P:GO:0071773; P:GO:0071805; P:GO:0086013; P:GO:0086091; P:GO:0097623; P:GO:0099625; P:GO:1990573; F:GO:0005249; F:GO:0005250; F:GO:0022839; F:GO:0044325; C:GO:0005901; C:GO:0008076; C:GO:0030425; C:GO:0043025; C:GO:0097038	P:chemical synaptic transmission; P:associative learning; P:regulation of ion transmembrane transport; P:protein homooligomerization; P:cellular response to BMP stimulus; P:potassium ion transmembrane transport; P:membrane repolarization during cardiac muscle cell action potential; P:regulation of heart rate by cardiac conduction; P:potassium ion export across plasma membrane; P:ventricular cardi…	EC:7	Translocases
jg15604	1	284.175	6.63115e-87	voltage-dependent calcium channel subunit alpha-2/delta-3 isoform X1	2610	P:GO:0007274; P:GO:0034765; P:GO:0045886; P:GO:0048488; P:GO:0050965; P:GO:0065009; P:GO:0070588; P:GO:0097352; P:GO:0098657; P:GO:1990314; F:GO:0005244; F:GO:0005245; F:GO:0005246; F:GO:0005262; F:GO:0022839; C:GO:0005891; C:GO:0016021; C:GO:0048786	P:neuromuscular synaptic transmission; P:regulation of ion transmembrane transport; P:negative regulation of synaptic assembly at neuromuscular junction; P:synaptic vesicle endocytosis; P:detection of temperature stimulus involved in sensory perception of pain; P:regulation of molecular function; P:calcium ion transmembrane transport; P:autophagosome maturation; P:import into cell; P:cellular res…	EC:7	Translocases
jg15606	1	543.612	2.09798e-117	ATPase H+ transporting accessory protein 1 like b	1026	P:GO:1902600; C:GO:0016021; C:GO:0033180	P:proton transmembrane transport; C:integral component of membrane; C:proton-transporting V-type ATPase, V1 domain	NA	NA
jg15607	1	168.636	3.43637e-15	beta-1,4-galactosyltransferase 3	1287	P:GO:0005975; P:GO:0006486; P:GO:0006682; P:GO:0009636; P:GO:0018146; P:GO:0043436; P:GO:0045747; F:GO:0003831; F:GO:0016757; F:GO:0033207; C:GO:0000139; C:GO:0005829; C:GO:0016021; C:GO:0032580	P:carbohydrate metabolic process; P:protein glycosylation; P:galactosylceramide biosynthetic process; P:response to toxic substance; P:keratan sulfate biosynthetic process; P:oxoacid metabolic process; P:positive regulation of Notch signaling pathway; F:beta-N-acetylglucosaminylglycopeptide beta-1,4-galactosyltransferase activity; F:glycosyltransferase activity; F:beta-1,4-N-acetylgalactosaminylt…	EC:2.4.1.90; EC:2.4; EC:2.4.1.38; EC:2; EC:2.4.1.22; EC:2.4.1	N-acetyllactosamine synthase; Glycosyltransferases; Beta-N-acetylglucosaminylglycopeptide beta-1,4-galactosyltransferase; Transferases; Lactose synthase; Glycosyltransferases
jg15624	1	296.139	2.80277e-45	potassium voltage-gated channel subfamily A member 3	564	P:GO:0001508; P:GO:0007611; P:GO:0007619; P:GO:0007637; P:GO:0008345; P:GO:0009584; P:GO:0034765; P:GO:0045838; P:GO:0045938; P:GO:0048047; P:GO:0048150; P:GO:0048675; P:GO:0050909; P:GO:0051260; P:GO:0060025; P:GO:0071242; P:GO:0071466; P:GO:0071805; P:GO:1903351; F:GO:0005249; F:GO:0005251; F:GO:0022839; C:GO:0008076	P:action potential; P:learning or memory; P:courtship behavior; P:proboscis extension reflex; P:larval locomotory behavior; P:detection of visible light; P:regulation of ion transmembrane transport; P:positive regulation of membrane potential; P:positive regulation of circadian sleep/wake cycle, sleep; P:mating behavior, sex discrimination; P:behavioral response to ether; P:axon extension; P:sens…	EC:7	Translocases
jg15648	1	1723.64	8.91587e-27	neuron navigator 1-like isoform X1	6861	P:GO:0001578; P:GO:0001764; P:GO:0022008; C:GO:0015630; C:GO:0043194	P:microtubule bundle formation; P:neuron migration; P:neurogenesis; C:microtubule cytoskeleton; C:axon initial segment	NA	NA
jg15661	1	220.955	5.91476e-80	chemokine-like protein TAFA-2	483	NA	NA	NA	NA
jg15701	1	755.804	1.02769e-39	ADP-ribosylation factor 3	495	P:GO:0006661; P:GO:0006886; P:GO:0006890; P:GO:0015833; P:GO:0016192; F:GO:0003924; F:GO:0005525; F:GO:0032550; C:GO:0000139; C:GO:0005886; C:GO:0098791	P:phosphatidylinositol biosynthetic process; P:intracellular protein transport; P:retrograde vesicle-mediated transport, Golgi to endoplasmic reticulum; P:peptide transport; P:vesicle-mediated transport; F:GTPase activity; F:GTP binding; F:purine ribonucleoside binding; C:Golgi membrane; C:plasma membrane; C:Golgi apparatus subcompartment	EC:3.6.1; EC:3.6; EC:3	Acting on acid anhydrides; Acting on acid anhydrides; Hydrolases
jg15722	1	459.864	1.14167e-07	zinc finger protein 385A-like isoform X2	1212	F:GO:0003676; F:GO:0008270	F:nucleic acid binding; F:zinc ion binding	NA	NA
jg15734	1	1945.11	1.01658e-90	neural cell adhesion molecule L1.2 isoform X1	3837	P:GO:0000132; P:GO:0001932; P:GO:0003384; P:GO:0007156; P:GO:0007157; P:GO:0007158; P:GO:0007159; P:GO:0007160; P:GO:0007173; P:GO:0007413; P:GO:0007560; P:GO:0008045; P:GO:0008049; P:GO:0008050; P:GO:0008366; P:GO:0009792; P:GO:0010811; P:GO:0014823; P:GO:0016319; P:GO:0019991; P:GO:0021682; P:GO:0022409; P:GO:0033563; P:GO:0033564; P:GO:0033631; P:GO:0034109; P:GO:0035011; P:GO:0035151; P:GO:00…	P:establishment of mitotic spindle orientation; P:regulation of protein phosphorylation; P:apical constriction involved in gastrulation; P:homophilic cell adhesion via plasma membrane adhesion molecules; P:heterophilic cell-cell adhesion via plasma membrane cell adhesion molecules; P:neuron cell-cell adhesion; P:leukocyte cell-cell adhesion; P:cell-matrix adhesion; P:epidermal growth factor recep…	NA	NA
jg15738	1	2243.98	2.36333e-20	serine/threonine-protein kinase WNK2 isoform X5	7602	P:GO:0006468; P:GO:0007411; P:GO:0010800; P:GO:0035220; P:GO:0035556; P:GO:0043066; P:GO:0046777; P:GO:0050801; P:GO:0051928; P:GO:0090188; P:GO:0090263; P:GO:0090279; P:GO:1903078; P:GO:1903288; P:GO:2000651; F:GO:0004674; F:GO:0005524; F:GO:0008200; F:GO:0019869; F:GO:0106310; C:GO:0005829; C:GO:0005912; C:GO:0005923	P:protein phosphorylation; P:axon guidance; P:positive regulation of peptidyl-threonine phosphorylation; P:wing disc development; P:intracellular signal transduction; P:negative regulation of apoptotic process; P:protein autophosphorylation; P:ion homeostasis; P:positive regulation of calcium ion transport; P:negative regulation of pancreatic juice secretion; P:positive regulation of canonical Wn…	EC:2.7.1; EC:2.7.11.1; EC:2.7; EC:2	Transferring phosphorus-containing groups; Non-specific serine/threonine protein kinase; Transferring phosphorus-containing groups; Transferases
jg15751	1	320.556	1.16436e-38	voltage-dependent L-type calcium channel subunit beta-4 isoform X1	1326	P:GO:0007528; P:GO:0031646; P:GO:0050806; P:GO:0050852; P:GO:0050966; P:GO:0060402; P:GO:0061577; P:GO:0070588; P:GO:0072659; P:GO:0090087; P:GO:0090314; P:GO:0090650; P:GO:0098903; P:GO:1901386; P:GO:1901843; P:GO:1902630; P:GO:1905788; P:GO:2000463; F:GO:0005245; F:GO:0008331; F:GO:0019901; F:GO:0022839; C:GO:0005891; C:GO:0016324; C:GO:1990454	P:neuromuscular junction development; P:positive regulation of nervous system process; P:positive regulation of synaptic transmission; P:T cell receptor signaling pathway; P:detection of mechanical stimulus involved in sensory perception of pain; P:calcium ion transport into cytosol; P:calcium ion transmembrane transport via high voltage-gated calcium channel; P:calcium ion transmembrane transpor…	EC:7	Translocases
jg15752	1	466.437	3.20754e-16	rho family GTPase 1b	615	P:GO:0007015; P:GO:0007162; P:GO:0007264; P:GO:0016322; F:GO:0003924; F:GO:0005102; F:GO:0005525; C:GO:0005829; C:GO:0005886; C:GO:0005912; C:GO:0015629; C:GO:0043231	P:actin filament organization; P:negative regulation of cell adhesion; P:small GTPase mediated signal transduction; P:neuron remodeling; F:GTPase activity; F:signaling receptor binding; F:GTP binding; C:cytosol; C:plasma membrane; C:adherens junction; C:actin cytoskeleton; C:intracellular membrane-bounded organelle	EC:3.6.1; EC:3.6; EC:3	Acting on acid anhydrides; Acting on acid anhydrides; Hydrolases
jg15762	1	3419.92	1.39149e-78	sodium channel, voltage gated, type VIII, alpha subunit a isoform X1	5880	P:GO:0007422; P:GO:0007517; P:GO:0007605; P:GO:0007628; P:GO:0009636; P:GO:0019228; P:GO:0035725; P:GO:0042552; P:GO:0050905; P:GO:0086010; F:GO:0005248; F:GO:0031402; C:GO:0001518; C:GO:0030018; C:GO:0030425; C:GO:0033268; C:GO:0043025; C:GO:0043194	P:peripheral nervous system development; P:muscle organ development; P:sensory perception of sound; P:adult walking behavior; P:response to toxic substance; P:neuronal action potential; P:sodium ion transmembrane transport; P:myelination; P:neuromuscular process; P:membrane depolarization during action potential; F:voltage-gated sodium channel activity; F:sodium ion binding; C:voltage-gated sodiu…	EC:7	Translocases
jg15796	1	1171.14	1.89579e-12	RNA-binding protein 15	2553	P:GO:0000122; P:GO:0000381; P:GO:0001569; P:GO:0007221; P:GO:0009048; P:GO:0010628; P:GO:0010629; P:GO:0035222; P:GO:0038163; P:GO:0045638; P:GO:0045652; P:GO:0048536; P:GO:0048749; P:GO:0060412; P:GO:0060674; P:GO:0080009; P:GO:0090263; P:GO:1903707; P:GO:2000737; F:GO:0003723; F:GO:0003729; C:GO:0016607; C:GO:0036396	P:negative regulation of transcription by RNA polymerase II; P:regulation of alternative mRNA splicing, via spliceosome; P:branching involved in blood vessel morphogenesis; P:positive regulation of transcription of Notch receptor target; P:dosage compensation by inactivation of X chromosome; P:positive regulation of gene expression; P:negative regulation of gene expression; P:wing disc pattern fo…	NA	NA
jg15809	1	331.426	7.61959e-112	amphoterin-induced protein 1	1122	P:GO:0007155; P:GO:0007413; P:GO:0007420; P:GO:0042552; C:GO:0005887	P:cell adhesion; P:axonal fasciculation; P:brain development; P:myelination; C:integral component of plasma membrane	NA	NA
jg15858	1	2520.6	2.51766e-29	calsyntenin-1 isoform X1	1719	P:GO:0001558; P:GO:0006874; P:GO:0007156; P:GO:0008355; P:GO:0016339; P:GO:0034613; P:GO:0044331; P:GO:0050806; P:GO:0051965; F:GO:0001540; F:GO:0005158; F:GO:0005509; F:GO:0019894; F:GO:0042988; C:GO:0000139; C:GO:0005615; C:GO:0005887; C:GO:0009986; C:GO:0014069; C:GO:0016021; C:GO:0030424; C:GO:0032809; C:GO:0042995; C:GO:0045202; C:GO:0045211	P:regulation of cell growth; P:cellular calcium ion homeostasis; P:homophilic cell adhesion via plasma membrane adhesion molecules; P:olfactory learning; P:calcium-dependent cell-cell adhesion via plasma membrane cell adhesion molecules; P:cellular protein localization; P:cell-cell adhesion mediated by cadherin; P:positive regulation of synaptic transmission; P:positive regulation of synapse asse…	NA	NA
jg15868	1	1784.79	4.68002e-19	kinesin-like protein KIF1B isoform X5	3462	NA	NA	NA	NA
jg15885	1	686.171	3.50832e-48	contactin-4 isoform X1	3090	P:GO:0007158; P:GO:0007411; P:GO:0007413; P:GO:0007420; P:GO:0008366; P:GO:0019991; P:GO:0021682; P:GO:0045197; P:GO:0045665; P:GO:0048167; P:GO:0050768; P:GO:0060857; P:GO:0061343; C:GO:0005576; C:GO:0005886; C:GO:0005918; C:GO:0016021; C:GO:0030424	P:neuron cell-cell adhesion; P:axon guidance; P:axonal fasciculation; P:brain development; P:axon ensheathment; P:septate junction assembly; P:nerve maturation; P:establishment or maintenance of epithelial cell apical/basal polarity; P:negative regulation of neuron differentiation; P:regulation of synaptic plasticity; P:negative regulation of neurogenesis; P:establishment of glial blood-brain bar…	NA	NA
[truncated: 4,253 more rows]
