# Supplementary material for: The transcriptional landscape underlying larval development and metamorphosis in the Malabar grouper (Epinephelus malabaricus)
Source: eLife. 2024 Aug 9;13:RP94573. doi: 10.7554/eLife.94573 (PMC11315451; doi:10.7554/eLife.94573)
Supplement: Supplementary file 1. [file elife-94573-supp1.xlsx]

## Sheet: Suppl. File 1
Supplementary File 1: Differentially expressed, upregulated and downregulated genes between consecutive time points.
Contrast	Differentially Expressed Gene	Upregulated genes	Downregulated Genes
D01 vs. D03	14830	7151	7679
D03 vs. D06	8381	4464	3917
D06 vs. D10	1844	790	1054
D10 vs. D13	1976	671	1305
D13 vs. D18	191	81	110
D18 vs. D32	10774	5320	5454
D32 vs. D60	2654	967	1687
D60 vs. Juvenile	6963	3259	3704
